# Supplementary material for: An expedient metal-free cascade route to chromonyl diene scaffolds: thermodynamic vs. kinetic control
Source: Royal Society of Chemistry journal article supplement (doi:10.1039/d2ra05704b), 2022-01-01
Supplement: d2ra05704b1.pdf [file d2ra05704b1.pdf]

## Supporting Information

### An expedient metal-free cascade route to chromonyl diene scaffolds: thermodynamic vs kinetic control

Abdolali Alizadeh,<sup>\*,a</sup> Akram Bagherinejad,<sup>a</sup> Jasmine Kayanian,<sup>a</sup> and Robert Vianello<sup>b</sup>

<sup>a</sup>Department of Chemistry, Tarbiat Modares University, P.O. Box 14115-175, Tehran, Iran

<sup>b</sup>Laboratory for the Computational Design and Synthesis of Functional Materials, Department of Organic Chemistry and Biochemistry, Rud-er Bos'kovic' Institute, Bijenic'ka 54, 10000 Zagreb, Croatia

aalizadeh@modares.ac.ir

#### The Table of Contents

|                                                                                                                                                                                                                                                                                         |         |
|-----------------------------------------------------------------------------------------------------------------------------------------------------------------------------------------------------------------------------------------------------------------------------------------|---------|
| Title, author's name, address, and Table of contents                                                                                                                                                                                                                                    | S1-S2   |
| Experimental and general procedure for the synthesis of <b>3</b>                                                                                                                                                                                                                        | S3      |
| Characteristic data for compounds <b>3a-3i</b>                                                                                                                                                                                                                                          | S3-S17  |
| Crystal data for <b>3b</b>                                                                                                                                                                                                                                                              | S7      |
| <sup>1</sup> H, <sup>13</sup> C NMR, IR, and Mass spectra of compounds <b>3a-3i</b>                                                                                                                                                                                                     | S18-S52 |
| <b>Computational Section</b>                                                                                                                                                                                                                                                            | S53-S54 |
| <b>Table 1.</b> Relative energies of <i>s</i> -trans, <i>s</i> -trans compared to <i>s</i> -trans, <i>s</i> -cis-conformers calculated using various DFT functionals and basis sets                                                                                                     | S55     |
| <b>Table 2.</b> B3LYP/6-3G(d) global electronic chemical potential, $\mu$ , chemical hardness, $\eta$ , electrophilicity, $\omega$ , and nucleophilicity, $N$ , in eV, of chromonyl barbituric's acid <b>1b</b> , neutral diene <b>A</b> , and carbanion <b>B</b> in CH <sub>3</sub> CN | S56     |
| <b>Fig 1.</b> Reaction profiles for the kinetic studies of the proposed <b>In<sub>1b</sub></b> and spirobarbiturate species <b>C</b> calculated at the B3LYP/6-31G(d) level of theory.                                                                                                  |         |
| <b>Table 3:</b> Single point energy <b>P<sub>3b</sub></b> and <b>P<sub>3'b</sub></b> compounds with different methods                                                                                                                                                                   | S57-S60 |
| A comparison of the computational and experimental NMR data for <b>3'b</b>                                                                                                                                                                                                              | S61     |
| A comparison of the computational and experimental NMR data for <b>3b</b>                                                                                                                                                                                                               | S62     |
| <b>Table 4.</b> Thermodynamic parameters for reactants at b3lyp/6-31g (d) level of theory                                                                                                                                                                                               | S63-S71 |

|                                                                                                                                                                                                                                                                                                                                                                |           |
|----------------------------------------------------------------------------------------------------------------------------------------------------------------------------------------------------------------------------------------------------------------------------------------------------------------------------------------------------------------|-----------|
| <b>Table 5.</b> Thermodynamic parameters for TS <sub>1</sub> at b3lyp/6-31g (d) level of theory                                                                                                                                                                                                                                                                | S72-S86   |
| <b>Table 6.</b> Thermodynamic parameters for intermediates <b>1a-1i</b> at b3lyp/6-31g (d) level of theory                                                                                                                                                                                                                                                     | S87-S101  |
| <b>Table 7.</b> Thermodynamic parameters for TS <sub>2</sub> [1,5]-H shift at b3lyp/6-31g (d) level of theory                                                                                                                                                                                                                                                  | S102-S116 |
| <b>Table 8.</b> Thermodynamic parameters for TS <sub>2</sub> [1,3]-H shift at b3lyp/6-31g (d) level of theory                                                                                                                                                                                                                                                  | S117-S129 |
| <b>Table 9.</b> Thermodynamic parameters for Intermediates <b>2a-2i</b> [1,5]-H shift at b3lyp/6-31g (d) level of theory                                                                                                                                                                                                                                       | S130-S144 |
| <b>Table 10.</b> Thermodynamic parameters for intermediates <b>2a-2i</b> [1,3]-H shift at b3lyp/6-31g (d) level of theory                                                                                                                                                                                                                                      | S145-S159 |
| <b>Table 11.</b> Thermodynamic parameters for TS <sub>3</sub> at b3lyp/6-31g (d) level of theory in cycloaddition step                                                                                                                                                                                                                                         | S160-S169 |
| <b>Table 12.</b> thermodynamic parameters for Intermediates <b>3a-3e</b> at b3lyp/6-31g (d) level of theory                                                                                                                                                                                                                                                    | S170-S179 |
| <b>Table 13.</b> thermodynamic parameters for TS <sub>3</sub> at b3lyp/6-31g (d) level of theory in the liberalization step of 1,3-Dimethyl barbituric acid.                                                                                                                                                                                                   | S180-S187 |
| <b>Table 14.</b> Thermodynamic parameters for Products ( <b>f-i</b> ) at b3lyp/6-31g (d) level of theory                                                                                                                                                                                                                                                       | S188-S193 |
| <b>Table 15.</b> Thermodynamic parameters for TS <sub>4</sub> at b3lyp/6-31g (d) level of theory                                                                                                                                                                                                                                                               | S194-S203 |
| <b>Table 16.</b> Thermodynamic parameters for TS annulation at b3lyp/6-31g (d) level of theory                                                                                                                                                                                                                                                                 | S204-S207 |
| <b>Table 17.</b> Thermodynamic parameters for Products ( <b>P<sub>a-e</sub></b> and <b>P<sub>a'-e'</sub></b> ) at M062x-def2tzvp// b3lyp/6-31g (d) level of theory                                                                                                                                                                                             | S208-S226 |
| <b>Fig. 2.</b> Relative Gibbs free energies for the mechanism of [1,3] and [1,5]-H-transfer (all values in kcal mol <sup>-1</sup> )                                                                                                                                                                                                                            | S227      |
| <b>Table 17.</b> Electron density ( $\rho$ BCP), Laplacian ( $\nabla^2\rho$ BCP), potential energy (V BCP), kinetic energy (G BCP), total electron energy densities (HBCP= GBCP-VBCP,) and interaction energy ( $\Delta\text{EHB} = \frac{1}{2} \text{VBCP}$ ), calculated at the respective bond critical points, by M06-2X/def2-tzvp in acetonitrile solvent | S228      |
| <b>Fig. 3.</b> The molecular graph of stereoisomers <b>P<sub>3b</sub></b> , <b>P<sub>3b'</sub></b> .                                                                                                                                                                                                                                                           | S229      |
| <b>Reference</b>                                                                                                                                                                                                                                                                                                                                               | S230-S231 |

## Experimental

The chromonyl barbituric's acid, and ylidenemalononitrile were prepared according to the reported procedure. All other chemicals and solvents were purchased from Merck or Aldrich and were used without further purification. Elemental analyses for C, H, and N were performed using a Heraeus CHN–O–Rapid analyzer. Mass spectra were recorded on a FINNIGAN-MATT 8430 mass spectrometer operating at an ionization potential of 70 eV. <sup>1</sup>H NMR (300 MHz), and <sup>13</sup>C NMR (75 MHz) spectra were obtained using Bruker DRX-300 AVANCE and Bruker DRX-400 AVANCE spectrometers. IR spectra were recorded as KBr pellets on a NICOLET FT-IR 100 spectrometer; absorbencies are reported in cm<sup>-1</sup>.

### General procedure for preparation of compounds 3a, 3b, 3c, 3e, and 3g.

A mixture of 3-formylchromone **1** (1.0 mmol) and 1,3-dimethylbarbituric acid (1.0 mmol) in HOAc/H<sub>2</sub>O was magnetically stirred for 0.5 h. The resulting yellow precipitation (0.75 mmol) was reacted with the carbanion obtained from alkylidene malononitrile **2** (1.0 mmol) with piperidine (10 mol%) in MeCN. After completion of the reaction at ambient temperature, the precipitate was washed with acetone to afford the pure products in high yield.

### General procedure for preparation of compounds 3d, 3f, 3h, and 3i.

A mixture of 3-formylchromone **1** (1.0 mmol) and 1,3-dimethylbarbituric acid in HOAc/H<sub>2</sub>O was magnetically stirred for 0.5 h. The resulting yellow precipitation (0.75 mmol) was reacted with the carbanion obtained from alkylidene malononitrile **2** (1.0 mmol) with piperidine (10 mol%) in MeCN. After completion of the reaction at refluxing temperature (80 °C), the precipitate was washed with acetone to afford the pure products in high yield.

**(2E,4E)-2-[Amino(1,3-dimethyl-2,4,6-trioxotetrahydro-5(2H)-pyrimidinylidene)methyl]-5-(4-oxo-4H-chromen-3-yl)-3-phenyl-2,4-pentadienenitrile (3a).**

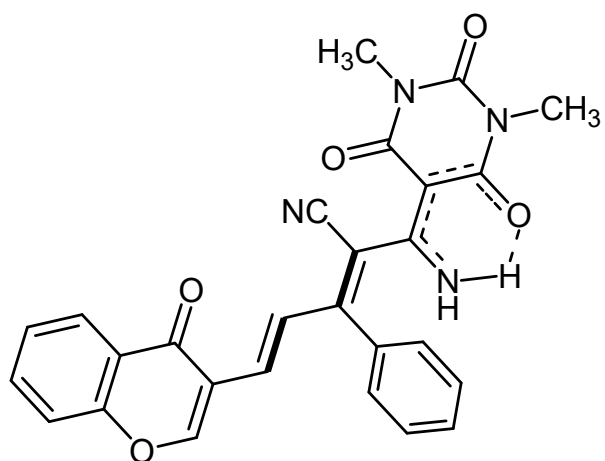

Cream powder, mp = 189-190 °C, 0.301 g, yield: 72%. IR (KBr) ( $\nu_{\max}$ ,  $\text{cm}^{-1}$ ): 3331 (NH), 2213 (CN), 1717, 1638 and 1614 (C=O), 1556 and 1463 (Ar). Anal. Calcd. for  $\text{C}_{27}\text{H}_{20}\text{N}_4\text{O}_5$  (480.47): C, 67.49; H, 4.20; N, 11.66%. Found: C, 67.44; H, 4.17; N, 11.61%. MS (EI, 70 eV):  $m/z$  (%) = 480 (100), 453 (55), 365 (91), 337 (98), 190 (36), 171 (34), 129 (35), 121 (80), 92 (95), 77 (49).  $^1\text{H}$  NMR (300.13 MHz,  $\text{DMSO}-d_6$ ):  $\delta_{\text{H}}$  3.13 (3H, s,  $\text{CH}_3$ ), 3.23 (3H, s,  $\text{CH}_3$ ), 6.26 (1H, d,  $^3J_{\text{HH}} = 15.7$  Hz,  $\text{CH}^4$ ), 7.17 (1H, t,  $^3J_{\text{HH}} = 7.3$  Hz,  $\text{CH}_{\text{para}}$  of Ph), 7.38-7.61 (5H, m, 4 CH of Ph and  $\text{CH}^8$  of chromone), 7.65 (1H, t,  $^3J_{\text{HH}} = 8.4$  Hz,  $\text{CH}^6$  of chromone), 7.82 (1H, td,  $^3J_{\text{HH}} = 8.6$  Hz,  $^4J_{\text{HH}} = 1.7$  Hz,  $\text{CH}^7$  of chromone), 7.97 (1H, d,  $^3J_{\text{HH}} = 15.8$  Hz,  $\text{CH}^5$ ), 8.07 (1H, dd,  $^3J_{\text{HH}} = 7.9$  Hz,  $^4J_{\text{HH}} = 1.6$  Hz,  $\text{CH}^5$  of chromone), 8.67 (1H, s,  $\text{CH}^2$  of chromone), 9.99 (1H, d,  $^2J_{\text{HH}} = 3.9$  Hz, NH), 10.93 (1H, d,  $^2J_{\text{HH}} = 4.0$  Hz, NH).  $^{13}\text{C}$  NMR (75.00 MHz,  $\text{DMSO}-d_6$ ):  $\delta_{\text{C}}$  27.39 ( $\text{CH}_3$ ), 27.61 ( $\text{CH}_3$ ), 90.22 ( $\text{C}^5$ ), 109.11 (C-CN), 116.47 (CN), 118.79 ( $\text{CH}^8$  of chromone), 118.91 ( $\text{C}^{4\text{a}}$  of chromone), 123.39 ( $\text{CH}^6$  of chromone), 125.46 ( $\text{CH}^4$  of chromone), 125.99 ( $\text{CH}^4$  of chromone), 126.93 ( $\text{C}^3$  of chromone), 128.65 (2  $\text{CH}_{\text{ortho}}$  of Ph), 129.09 (2  $\text{CH}_{\text{meta}}$  of Ph), 129.33 ( $\text{CH}_{\text{para}}$  of Ph), 133.55 ( $\text{CH}^7$  of chromone), 134.48 ( $\text{CH}^5$ ), 135.25 ( $\text{C}_{\text{ipso}}$  of Ph), 150.89 ( $\text{C}^3$ ), 153.77 ( $\text{CH}^2$  of chromone), 154.94 (C=O), 159.74 ( $\text{C}^{8\text{a}}$  of chromone), 161.10 (C=O), 163.09 (C=O), 164.75 (C-NH<sub>2</sub>), 175.25 (C=O).

**(2E,4E)-2-[Amino(1,3-dimethyl-2,4,6-trioxotetrahydro-5(2H)-pyrimidinylidene)methyl]-5-(4-oxo-4H-chromen-3-yl)-3-phenyl-2,4-pentadienenitrile (3'a).**

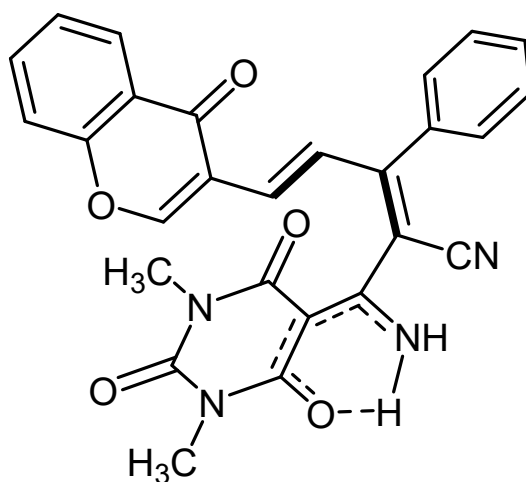

Cream powder, mp = 189-190 °C, 0.301 g, yield: 72%. IR (KBr) ( $\nu_{\max}$ ,  $\text{cm}^{-1}$ ): 3331 (NH), 2213 (CN), 1717, 1638 and 1614 (C=O), 1556 and 1463 (Ar). Anal. Calcd. for  $\text{C}_{27}\text{H}_{20}\text{N}_4\text{O}_5$  (480.47): C, 67.49; H, 4.20; N, 11.66%. Found: C, 67.44; H, 4.17; N, 11.61%. MS (EI, 70 eV):  $m/z$  (%) = 480 (100), 453 (55), 365 (91), 337 (98), 190 (36), 171 (34), 129 (35), 121 (80), 92 (95), 77 (49).  $^1\text{H}$  NMR (300.13 MHz,  $\text{DMSO}-d_6$ ):  $\delta_{\text{H}}$  3.09 (3H, s,  $\text{CH}_3$ ), 3.16 (3H, s,  $\text{CH}_3$ ), 6.29 (1H, d,  $^3J_{\text{HH}} = 15.5$  Hz,  $\text{CH}^4$ ), 7.16 (1H, t,  $^3J_{\text{HH}} = 7.3$  Hz,  $\text{CH}_{\text{para}}$  of Ph), 7.38-7.61 (5H, m, 4 CH of Ph and  $\text{CH}^8$  of chromone), 7.66 (1H, t,  $^3J_{\text{HH}} = 8.4$  Hz,  $\text{CH}^6$  of chromone), 7.79 (1H, td,  $^3J_{\text{HH}} = 8.6$  Hz,  $^4J_{\text{HH}} = 1.7$  Hz,  $\text{CH}^7$  of chromone), 8.17 (1H, dd,  $^3J_{\text{HH}} = 8.0$  Hz,  $^4J_{\text{HH}} = 1.7$  Hz,  $\text{CH}^5$  of chromone), 8.57 (1H, d,  $^3J_{\text{HH}} = 15.6$  Hz,  $\text{CH}^5$ ), 8.65 (1H, s,  $\text{CH}^2$  of chromone), 9.44 (1H, d,  $^2J_{\text{HH}} = 4.0$  Hz, NH), 10.37 (1H, d,  $^2J_{\text{HH}} = 4.2$  Hz, NH).  $^{13}\text{C}$  NMR (75.00 MHz,  $\text{DMSO}-d_6$ ):  $\delta_{\text{C}}$  27.22 ( $\text{CH}_3$ ), 27.61 ( $\text{CH}_3$ ), 90.77 ( $\text{C}^5$ ), 108.71 (C-CN), 115.56 (CN), 118.79 ( $\text{CH}^8$  of chromone), 118.79 ( $\text{C}^{4\text{a}}$  of chromone), 123.51 ( $\text{CH}^6$  of chromone), 125.54 ( $\text{CH}^5$  of chromone), 126.05 ( $\text{CH}^4$ ), 126.93 ( $\text{C}^3$  of chromone), 128.43 (2  $\text{CH}_{\text{meta}}$  of Ph), 128.70 (2  $\text{CH}_{\text{ortho}}$  of Ph), 129.10 ( $\text{CH}_{\text{para}}$  of Ph), 132.73 ( $\text{CH}^7$  of chromone), 133.24 ( $\text{CH}^5$ ), 135.25 ( $\text{C}_{\text{ipso}}$  of Ph), 150.84 ( $\text{C}^3$ ), 154.57 ( $\text{CH}^2$  of chromone), 154.94 (C=O), 159.39 ( $\text{C}^{8\text{a}}$  of chromone), 161.37 (C=O), 163.52 (C=O), 164.24 (C-NH<sub>2</sub>), 175.37 (C=O).

**(2E,4E)-2-[Amino(1,3-dimethyl-2,4,6-trioxotetrahydro-5(2H)-pyrimidinylidene)methyl]-3-(4-methoxyphenyl)-5-(4-oxo-4H-chromen-3-yl)-2,4-pentadienenitrile (3b).**

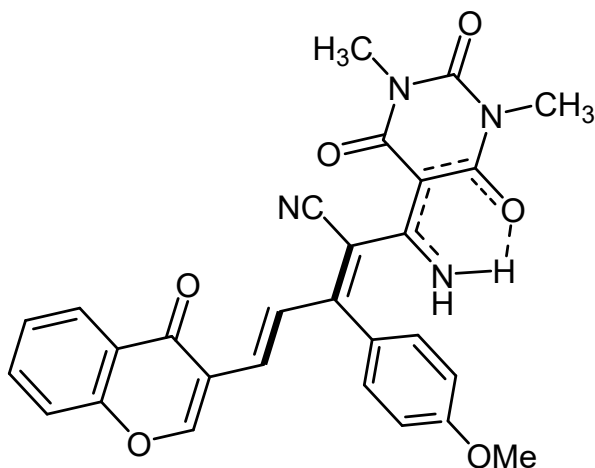

Cream powder, mp = 195-196 °C, 0.428 g, yield: 84%. IR (KBr) ( $\nu_{\max}$ ,  $\text{cm}^{-1}$ ): 3420 (NH), 2213 (CN), 1716, 1643 and 1615 (C=O), 1557 and 1463 (Ar). Anal. Calcd. for  $\text{C}_{28}\text{H}_{22}\text{N}_4\text{O}_6$  (510.50): C, 65.88; H, 4.34; N, 10.97%. Found: C, 65.84; H, 4.29; N, 10.93%. MS (EI, 70 eV):  $m/z$  (%) = 510 (100), 453 (55), 365 (91), 337 (98), 190 (36), 171 (34), 129 (35), 121 (80), 92 (95), 77 (49).  $^1\text{H}$  NMR (300.13 MHz,  $\text{DMSO}-d_6$ ):  $\delta_{\text{H}}$  3.13 (3H, s,  $\text{CH}_3$ ), 3.23 (3H, s,  $\text{CH}_3$ ), 3.85 (3H, s,  $\text{OCH}_3$ ), 6.32 (1H, d,  $^3J_{\text{HH}} = 15.6$  Hz,  $\text{CH}^4$ ), 6.97 (1H, d,  $^3J_{\text{HH}} = 8.3$  Hz,  $\text{CH}^8$  of chromone), 7.14 (2H, d,  $^3J_{\text{HH}} = 8.2$  Hz, 2 CH of Ar), 7.44 (2H, d,  $^3J_{\text{HH}} = 8.2$  Hz, 2 CH of Ar), 7.65 (1H, t,  $^3J_{\text{HH}} = 7.8$  Hz,  $\text{CH}^6$  of chromone), 7.79 (1H, t,  $^3J_{\text{HH}} = 8.0$  Hz,  $\text{CH}^7$  of chromone), 7.94 (1H, d,  $^3J_{\text{HH}} = 15.6$  Hz,  $\text{CH}^5$ ), 8.07 (1H, d,  $^3J_{\text{HH}} = 7.9$  Hz,  $\text{CH}^5$  of chromone), 8.69 (1H, s,  $\text{CH}^2$  of chromone), 9.94 (1H, d,  $^2J_{\text{HH}} = 4.0$  Hz, NH), 10.92 (1H, d,  $^2J_{\text{HH}} = 4.0$  Hz, NH).  $^{13}\text{C}$  NMR (75.00 MHz,  $\text{DMSO}-d_6$ ):  $\delta_{\text{C}}$  27.38 ( $\text{CH}_3$ ), 27.61 ( $\text{CH}_3$ ), 55.17 ( $\text{OCH}_3$ ), 90.21 ( $\text{C}^5$ ), 108.60 (C-CN), 114.02 (2 CH of Ar), 116.74 (CN), 118.64 ( $\text{C}^{4a}$  of chromone), 119.03 ( $\text{CH}^8$  of chromone), 123.42 ( $\text{CH}^6$  of chromone), 125.56 ( $\text{C}^3$  of chromone), 125.68 ( $\text{CH}^5$  of chromone), 127.25 ( $\text{CH}^4$ ), 129.65 ( $\text{C}_{\text{ipso}}$  of Ar), 130.34 ( $\text{CH}^5$ ), 130.75 (2 CH of Ar), 134.57 ( $\text{CH}^7$  of chromone), 150.89 ( $\text{C}^3$ ), 153.65 ( $\text{CH}^2$  of chromone), 154.96 (C=O), 159.36 ( $\text{C}_{\text{ipso}}\text{-OCH}_3$ ), 159.99 ( $\text{C}^{8a}$  of chromone), 161.07 (C=O), 163.39 (C=O), 164.79 (C-NH<sub>2</sub>), 175.26 (C=O). Crystal data for **3b**  $\text{C}_{28}\text{H}_{22}\text{N}_4\text{O}_6$  (CCDC 1970238):  $M_{\text{w}} = 575.55$ , orthorhombic, P 21 21 21,  $a = 9.7052(19)$  Å,  $b = 13.015(3)$  Å,  $c = 19.712(4)$  Å,  $\alpha = 90.00$ ,  $\beta = 90.00$ ,  $\gamma = 90.00$ ,  $V = 2489.9(9)$  Å<sup>3</sup>,  $Z = 4$ ,  $D_{\text{c}} = 1.395$  mg/m<sup>3</sup>,  $F(000) = 1096$ , crystal dimension  $0.25 \times 0.20 \times 0.15$  mm, radiation, Mo K $\alpha$  ( $\lambda = 0.71073$  Å),  $2.1 \leq 2\theta \leq 25.0$ , intensity data were collected at 293.15 K with a

Bruker APEX area-detector diffractometer, and employing  $\omega/2\theta$  scanning technique, in the range of  $-11 \leq h \leq 11$ ,  $-15 \leq k \leq 15$ ,  $-23 \leq l \leq 21$ ; the structure was solved by a direct method, all non-hydrogen atoms were positioned and anisotropic thermal parameters refined from 4325 observed reflections with  $R(\text{int}) = 0.0750$  by a full-matrix least-squares technique converged to  $R1 = 0.0490$ , and  $wR2 = 0.1234$  [ $I > 2\sigma(I)$ ].

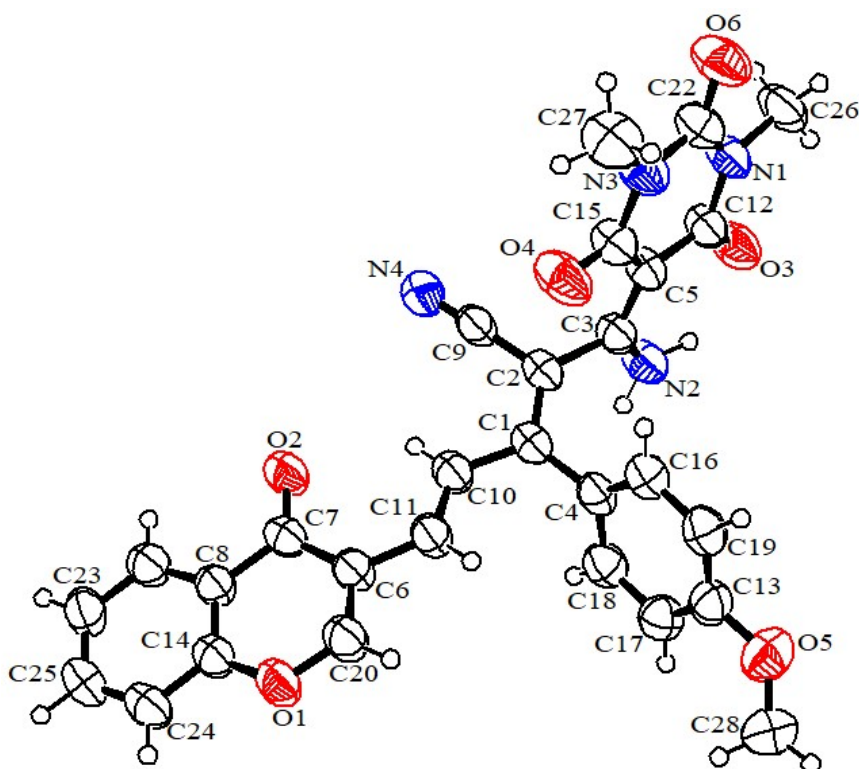

Ortep diagram of **3b**

**(2E,4E)-2-[Amino(1,3-dimethyl-2,4,6-trioxotetrahydro-5(2H)-pyrimidinylidene)methyl]-3-(4-methoxyphenyl)-5-(4-oxo-4H-chromen-3-yl)-2,4-pentadienenitrile (3'b).**

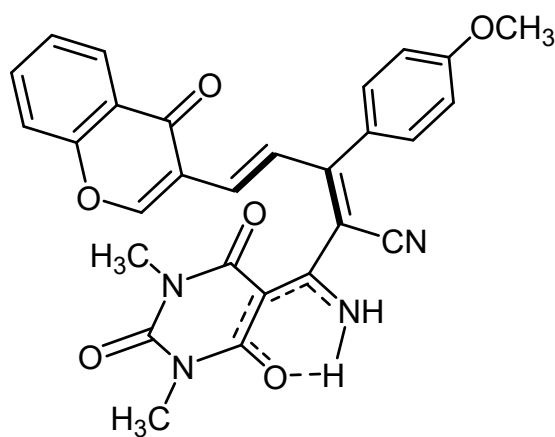

Cream powder, mp = 195-196 °C, 0.428 g, yield: 84%. IR (KBr) ( $\nu_{\max}$ ,  $\text{cm}^{-1}$ ): 3420 (NH), 2213 (CN), 1716, 1643 and 1615 (C=O), 1557 and 1463 (Ar). Anal. Calcd. for  $\text{C}_{28}\text{H}_{22}\text{N}_4\text{O}_6$  (510.50): C, 65.88; H, 4.34; N, 10.97%. Found: C, 65.84; H, 4.29; N, 10.93%. MS (EI, 70 eV):  $m/z$  (%) = 510 (100), 453 (55), 365 (91), 337 (98), 190 (36), 171 (34), 129 (35), 121 (80), 92 (95), 77 (49).  $^1\text{H}$  NMR (300.13 MHz,  $\text{DMSO-}d_6$ ):  $\delta_{\text{H}}$  3.11 (3H, s,  $\text{CH}_3$ ), 3.17 (3H, s,  $\text{CH}_3$ ), 3.76 (3H, s,  $\text{OCH}_3$ ), 6.36 (1H, d,  $^3J_{\text{HH}} = 15.6$  Hz,  $\text{CH}^4$ ), 6.97 (1H, d,  $^3J_{\text{HH}} = 8.3$  Hz,  $\text{CH}^8$  of chromone), 7.11 (2H, d,  $^3J_{\text{HH}} = 8.3$  Hz, 2 CH of Ar), 7.49 (2H, d,  $^3J_{\text{HH}} = 8.1$  Hz, 2 CH of Ar), 7.65 (1H, t,  $^3J_{\text{HH}} = 7.8$  Hz,  $\text{CH}^6$  of chromone), 7.83 (1H, t,  $^3J_{\text{HH}} = 8.0$  Hz,  $\text{CH}^7$  of chromone), 8.17 (1H, d,  $^3J_{\text{HH}} = 8.0$  Hz,  $\text{CH}^5$  of chromone), 8.53 (1H, d,  $^3J_{\text{HH}} = 15.5$  Hz,  $\text{CH}^5$ ), 8.66 (1H, s,  $\text{CH}^2$  of chromone), 9.39 (1H, d,  $^2J_{\text{HH}} = 4.0$  Hz, NH), 10.40 (1H, d,  $^2J_{\text{HH}} = 4.0$  Hz, NH).  $^{13}\text{C}$  NMR (75.00 MHz,  $\text{DMSO-}d_6$ ):  $\delta_{\text{C}}$  27.23 ( $\text{CH}_3$ ), 27.29 ( $\text{CH}_3$ ), 55.06 ( $\text{OCH}_3$ ), 90.85 ( $\text{C}^5$ ), 100.31 (C-CN), 114.02 (2 CH of Ar), 115.75 (CN), 118.33 ( $\text{C}^{4a}$  of chromone), 118.92 ( $\text{CH}^8$  of chromone), 123.54 ( $\text{CH}^6$  of chromone), 125.56 ( $\text{CH}^5$  of chromone), 126.00 ( $\text{C}^3$  of chromone), 127.23 ( $\text{CH}^4$ ), 129.57 ( $\text{C}_{\text{ipso}}$  of Ar), 130.33 (2 CH of Ar), 130.37 ( $\text{CH}^5$ ), 133.18 ( $\text{CH}^7$  of chromone), 150.89 ( $\text{C}^3$ ), 154.65 ( $\text{CH}^2$  of chromone), 154.96 (C=O), 159.61 ( $\text{C}_{\text{ipso-OCH}_3}$ ), 159.79 ( $\text{C}^{8a}$  of chromone), 161.38 (C=O), 163.99 (C=O), 164.33 (C-NH<sub>2</sub>), 175.38 (C=O).

**(2E,4E)-2-[Amino(1,3-dimethyl-2,4,6-trioxotetrahydro-5(2H)-pyrimidinylidene)methyl]-3-(2,3-dimethoxyphenyl)-5-(4-oxo-4H-chromen-3-yl)-2,4-pentadienenitrile (3c).**

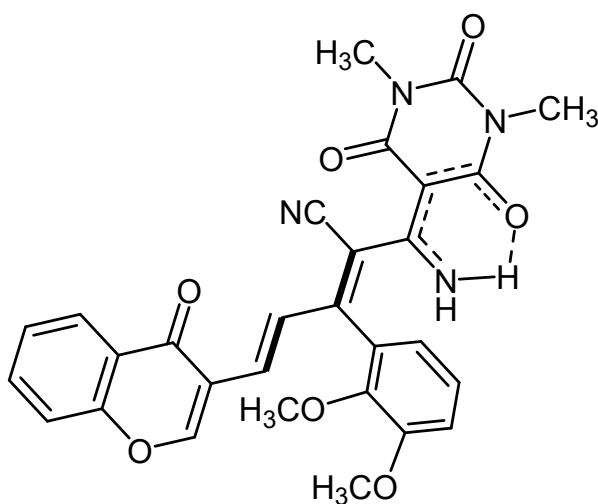



Cream powder, mp = 197-198 °C, 0.421 g, yield: 78%. IR (KBr) ( $\nu_{\max}$ ,  $\text{cm}^{-1}$ ): 3332 (NH), 2215 (CN), 1712, 1648 and 1615 (C=O), 1547 and 1467 (Ar). Anal. Calcd. for  $\text{C}_{29}\text{H}_{24}\text{N}_4\text{O}_7$  (540.52): C, 64.44; H, 4.48; N, 10.37%. Found: C, 64.41; H, 4.45; N, 10.34%. MS (EI, 70 eV):  $m/z$  (%) = 540 (9), 431 (7), 384 (11), 319 (17), 121 (11), 92 (10), 43 (100).  $^1\text{H}$  NMR (300.13 MHz,  $\text{DMSO-}d_6$ ):  $\delta_{\text{H}}$  3.13 (3H, s,  $\text{CH}_3$ ), 3.23 (3H, s,  $\text{CH}_3$ ), 3.80 (3H, s,  $\text{OCH}_3$ ), 3.85 (3H, s,  $\text{OCH}_3$ ), 6.39 (1H, d,  $^3J_{\text{HH}} = 15.6$  Hz,  $\text{CH}^4$ ), 6.73 (1H, d,  $^3J_{\text{HH}} = 7.5$  Hz, CH of Ar), 7.05 (1H, t,  $^3J_{\text{HH}} = 7.9$  Hz, CH of Ar), 7.17 (1H, d,  $^3J_{\text{HH}} = 8.0$  Hz, CH of Ar), 7.49 (1H, t,  $^3J_{\text{HH}} = 8.1$  Hz,  $\text{CH}^6$  of chromone), 7.68 (1H, d,  $^3J_{\text{HH}} = 8.4$  Hz,  $\text{CH}^8$  of chromone), 7.80 (1H, t,  $^3J_{\text{HH}} = 8.7$  Hz,  $\text{CH}^7$  of chromone), 7.94 (1H, d,  $^3J_{\text{HH}} = 15.6$  Hz,  $\text{CH}^5$ ), 8.17 (1H, d,  $^3J_{\text{HH}} = 7.9$  Hz,  $\text{CH}^5$  of chromone), 8.69 (1H, s,  $\text{CH}^2$  of chromone), 9.93 (1H, d,  $^2J_{\text{HH}} = 4.1$  Hz, NH), 10.92 (1H, d,  $^2J_{\text{HH}} = 4.0$  Hz, NH).  $^{13}\text{C}$  NMR (75.00 MHz,  $\text{DMSO-}d_6$ ):  $\delta_{\text{C}}$  27.38 ( $\text{CH}_3$ ), 27.58 ( $\text{CH}_3$ ), 55.15 ( $\text{OCH}_3$ ), 55.73 ( $\text{OCH}_3$ ), 90.78 ( $\text{C}^5$ ), 108.25 (C-CN), 111.53 (CN), 112.73 (CH of Ar), 115.72 (CH of Ar), 116.77 (CH of Ar), 118.67 ( $\text{C}^3$  of chromone), 118.91 ( $\text{CH}^8$  of chromone), 121.58 ( $\text{C}^{4a}$  of chromone), 122.17 ( $\text{C}_{\text{ipso}}$  of Ar), 123.54 ( $\text{CH}^6$  of chromone), 125.69 ( $\text{CH}^5$  of chromone), 127.26 ( $\text{CH}^4$ ), 129.38 ( $\text{CH}^5$ ), 134.28 ( $\text{CH}^7$  of chromone), 148.04 ( $\text{C}_{\text{ipso-OCH}_3}$ ), 149.60 ( $\text{C}_{\text{ipso-OCH}_3}$ ), 150.89 ( $\text{C}^3$ ), 153.73 ( $\text{CH}^2$  of chromone), 154.94 (C=O), 159.47 ( $\text{C}^{8a}$  of chromone), 161.04 (C=O), 163.40 (C=O), 164.76 (C-NH<sub>2</sub>), 175.30 (C=O).

**(2E,4E)-2-[Amino(1,3-dimethyl-2,4,6-trioxotetrahydro-5(2H)-pyrimidinylidene)methyl]-3-(2,3-dimethoxyphenyl)-5-(4-oxo-4H-chromen-3-yl)-2,4-pentadienenitrile (3'c).**

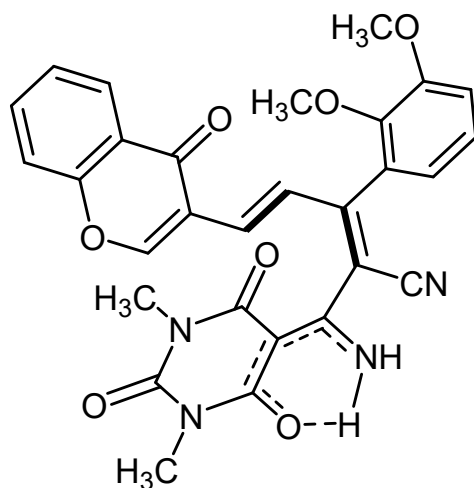

Cream powder, mp = 197-198 °C, 0.421 g, yield: 78%. IR (KBr) ( $\nu_{\max}$ ,  $\text{cm}^{-1}$ ): 3332 (NH), 2215 (CN), 1712, 1648 and 1615 (C=O), 1547 and 1467 (Ar). Anal. Calcd. for  $\text{C}_{29}\text{H}_{24}\text{N}_4\text{O}_7$  (540.52): C, 64.44; H, 4.48; N, 10.37%. Found: C, 64.41; H, 4.45; N, 10.34%. MS (EI, 70 eV):  $m/z$  (%) = 540 (9), 431 (7), 384 (11), 319 (17), 121 (11), 92 (10), 43 (100).  $^1\text{H}$  NMR (300.13 MHz,  $\text{DMSO}-d_6$ ):  $\delta_{\text{H}}$  3.11 (3H, s,  $\text{CH}_3$ ), 3.16 (3H, s,  $\text{CH}_3$ ), 3.62 (3H, s,  $\text{OCH}_3$ ), 3.75 (3H, s,  $\text{OCH}_3$ ), 6.42 (1H, d,  $^3J_{\text{HH}} = 15.6$  Hz,  $\text{CH}^4$ ), 6.70 (1H, d,  $^3J_{\text{HH}} = 7.5$  Hz, CH of Ar), 6.99 (1H, d,  $^3J_{\text{HH}} = 8.0$  Hz, CH of Ar), 7.06 (1H, t,  $^3J_{\text{HH}} = 7.9$  Hz, CH of Ar), 7.54 (1H, t,  $^3J_{\text{HH}} = 8.1$  Hz,  $\text{CH}^6$  of chromone), 7.64 (1H, d,  $^3J_{\text{HH}} = 8.4$  Hz,  $\text{CH}^8$  of chromone), 7.83 (1H, t,  $^3J_{\text{HH}} = 8.7$  Hz,  $\text{CH}^7$  of chromone), 8.07 (1H, d,  $^3J_{\text{HH}} = 8.0$  Hz,  $\text{CH}^5$  of chromone), 8.54 (1H, d,  $^3J_{\text{HH}} = 15.5$  Hz,  $\text{CH}^5$ ), 8.72 (1H, s,  $\text{CH}^2$  of chromone), 9.44 (1H, bs, NH), 10.42 (1H, bs, NH).  $^{13}\text{C}$  NMR (75.00 MHz,  $\text{DMSO}-d_6$ ):  $\delta_{\text{C}}$  27.22 ( $\text{CH}_3$ ), 27.57 ( $\text{CH}_3$ ), 54.34 ( $\text{OCH}_3$ ), 54.55 ( $\text{OCH}_3$ ), 90.16 ( $\text{C}^5$ ), 108.51 (C-CN), 111.32 (CN), 112.31 (CH of Ar), 115.72 (CH of Ar), 116.77 (CH of Ar), 118.33 ( $\text{C}^3$  of chromone), 119.04 ( $\text{CH}^8$  of chromone), 121.26 ( $\text{C}^{4a}$  of chromone), 122.16 ( $\text{C}_{\text{ipso}}$  of Ar), 123.42 ( $\text{CH}^6$  of chromone), 125.69 ( $\text{CH}^5$  of chromone), 127.26 ( $\text{CH}^4$ ), 129.25 ( $\text{CH}^5$ ), 134.61 ( $\text{CH}^7$  of chromone), 148.33 ( $\text{C}_{\text{ipso}}\text{-OCH}_3$ ), 149.23 ( $\text{C}_{\text{ipso}}\text{-OCH}_3$ ), 150.84 ( $\text{C}^3$ ), 154.73 ( $\text{CH}^2$  of chromone), 154.94 (C=O), 159.85 ( $\text{C}^{8a}$  of chromone), 161.43 (C=O), 164.03 (C=O), 164.27 (C-NH<sub>2</sub>), 175.42 (C=O).

**(2E,4E)-2-[Amino(1,3-dimethyl-2,4,6-trioxotetrahydro-5(2H)-pyrimidinylidene)methyl]-5-(6-chloro-4-oxo-4H-chromen-3-yl)-3-phenyl-2,4-pentadienenitrile (3d).**

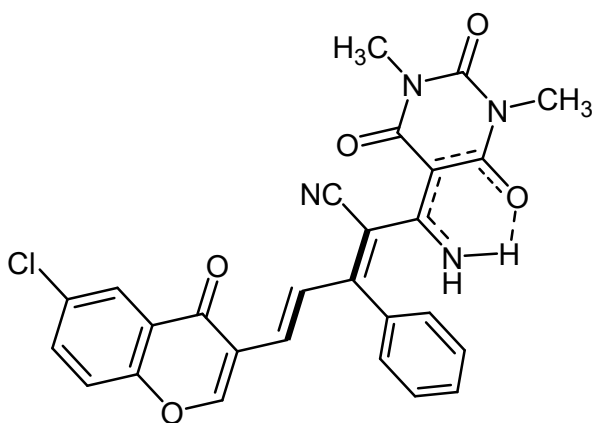

Cream powder, mp = 189-190 °C, 0.344 g, yield: 67%. IR (KBr) ( $\nu_{\max}$ ,  $\text{cm}^{-1}$ ): 3429 (NH), 2229 (CN), 1647 and 1607 (C=O), 1559 and 1467 (Ar). Anal. Calcd. for  $\text{C}_{27}\text{H}_{19}\text{ClN}_4\text{O}_5$  (514.92): C, 62.98; H, 3.72; N, 10.88%. Found: C, 62.95; H, 3.69; N, 10.84%. MS (EI, 70 eV):  $m/z$  (%) = 514 (50), 487 (100), 399 (48), 371 (52), 190 (55), 155 (61), 126 (96), 98 (29), 58 (71).  $^1\text{H}$  NMR (300.13 MHz,  $\text{DMSO-}d_6$ ):  $\delta_{\text{H}}$  3.14 (3H, s,  $\text{CH}_3$ ), 3.24 (3H, s,  $\text{CH}_3$ ), 6.24 (1H, d,  $^3J_{\text{HH}} = 15.6$  Hz,  $\text{CH}^4$ ), 7.16 (1H, td,  $^3J_{\text{HH}} = 7.0$  Hz,  $^4J_{\text{HH}} = 2.0$  Hz,  $\text{CH}_{\text{para}}$  of Ph), 7.48 (2H, dd,  $^3J_{\text{HH}} = 7.8$  Hz,  $^4J_{\text{HH}} = 1.7$  Hz, 2  $\text{CH}_{\text{ortho}}$  of Ph), 7.58 (2H, t,  $^3J_{\text{HH}} = 7.1$  Hz, 2  $\text{CH}_{\text{meta}}$  of Ph), 7.73 (1H, d,  $^3J_{\text{HH}} = 8.9$  Hz,  $\text{CH}^8$  of chromone), 7.89 (1H, dd,  $^3J_{\text{HH}} = 9.0$  Hz,  $^4J_{\text{HH}} = 2.5$  Hz,  $\text{CH}^7$  of chromone), 7.94 (1H, d,  $^3J_{\text{HH}} = 15.7$  Hz,  $\text{CH}^5$ ), 8.01 (1H, d,  $^4J_{\text{HH}} = 2.5$  Hz,  $\text{CH}^5$  of chromone), 8.69 (1H, s,  $\text{CH}^2$  of chromone), 9.98 (1H, bs, NH), 10.91 (1H, bs, NH).  $^{13}\text{C}$  NMR (75.00 MHz,  $\text{DMSO-}d_6$ ):  $\delta_{\text{C}}$  27.36 ( $\text{CH}_3$ ), 27.59 ( $\text{CH}_3$ ), 90.24 ( $\text{C}^5$ ), 109.32 (C-CN), 116.40 (CN), 118.95 ( $\text{CH}^8$  of chromone), 120.95 ( $\text{C}^3$  of chromone), 124.51 ( $\text{CH}^5$  of chromone), 124.51 ( $\text{C}^{4a}$  of chromone), 128.63 (2  $\text{CH}_{\text{meta}}$  of Ph), 129.07 (2  $\text{CH}_{\text{ortho}}$  of Ph), 129.14 ( $\text{CH}^4$ ), 129.33 ( $\text{CH}_{\text{para}}$  of Ph), 130.42 ( $\text{CH}^5$ ), 132.26 ( $\text{C}_{\text{ipso-Cl}}$ ), 134.26 ( $\text{C}_{\text{ipso}}$  of Ph), 135.18 ( $\text{CH}^7$  of chromone), 150.87 ( $\text{C}^3$ ), 153.52 (C=O), 153.59 ( $\text{CH}^2$  of chromone), 159.49 ( $\text{C}^{8a}$  of chromone), 161.09 (C=O), 163.03 (C=O), 174.17 (C-NH<sub>2</sub>), 174.72 (C=O).

**(2E,4E)-2-[Amino(1,3-dimethyl-2,4,6-trioxotetrahydro-5(2H)-pyrimidinylidene)methyl]-5-(6-chloro-4-oxo-4H-chromen-3-yl)-3-phenyl-2,4-pentadienenitrile (3'd).**

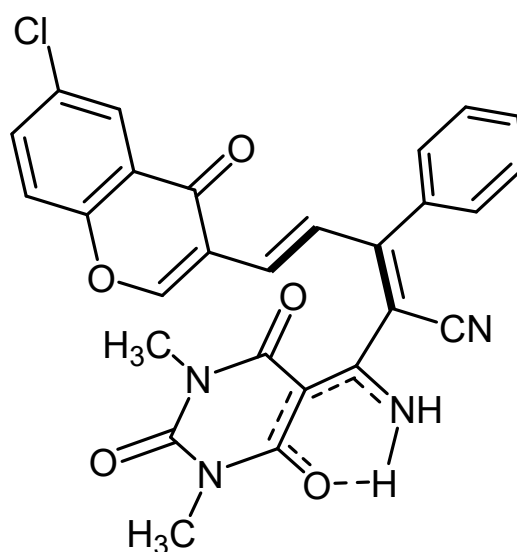

Cream powder, mp = 189-190 °C, 0.344 g, yield: 67%. IR (KBr) ( $\nu_{\max}$ ,  $\text{cm}^{-1}$ ): 3429 (NH), 2229 (CN), 1647 and 1607 (C=O), 1559 and 1467 (Ar). Anal. Calcd. for  $\text{C}_{27}\text{H}_{19}\text{ClN}_4\text{O}_5$  (514.92): C, 62.98; H, 3.72; N, 10.88%. Found: C, 62.95; H, 3.69; N, 10.84%. MS (EI, 70 eV):  $m/z$  (%) = 514 (50), 487 (100), 399 (48), 371 (52), 190 (55), 155 (61), 126 (96), 98 (29), 58 (71).  $^1\text{H}$  NMR (300.13 MHz,  $\text{DMSO-}d_6$ ):  $\delta_{\text{H}}$  3.09 (3H, s,  $\text{CH}_3$ ), 3.16 (3H, s,  $\text{CH}_3$ ), 6.28 (1H, d,  $^3J_{\text{HH}} = 15.6$  Hz,  $\text{CH}^4$ ), 7.15 (1H, t,  $^3J_{\text{HH}} = 7.0$  Hz,  $\text{CH}_{\text{para}}$  of Ph), 7.38-7.59 (4H, m, 4 CH of Ph), 7.77 (1H, d,  $^3J_{\text{HH}} = 9.1$  Hz,  $\text{CH}^8$  of chromone), 7.85 (1H, dd,  $^3J_{\text{HH}} = 8.7$  Hz,  $^4J_{\text{HH}} = 2.5$  Hz,  $\text{CH}^7$  of chromone), 8.11 (1H, d,  $^4J_{\text{HH}} = 2.6$  Hz,  $\text{CH}^5$  of chromone), 8.54 (1H, d,  $^3J_{\text{HH}} = 15.5$  Hz,  $\text{CH}^5$ ), 8.72 (1H, s,  $\text{CH}^2$  of chromone), 9.44 (1H, bs, NH), 10.36 (1H, bs, NH).  $^{13}\text{C}$  NMR (75.00 MHz,  $\text{DMSO-}d_6$ ):  $\delta_{\text{C}}$  27.19 ( $\text{CH}_3$ ), 27.59 ( $\text{CH}_3$ ), 90.78 ( $\text{C}^5$ ), 108.96 (C-CN), 115.49 (CN), 118.83 ( $\text{CH}^8$  of chromone), 120.99 ( $\text{C}^3$  of chromone), 124.44 ( $\text{CH}^5$  of chromone), 124.63 ( $\text{C}^{4a}$  of chromone), 127.26 ( $\text{CH}^4$ ), 128.41 (2  $\text{CH}_{\text{meta}}$  of Ph), 128.68 (2  $\text{CH}_{\text{ortho}}$  of Ph), 129.62 ( $\text{CH}_{\text{para}}$  of Ph), 130.48 ( $\text{CH}^5$ ), 132.74 ( $\text{C}_{\text{ipso-Cl}}$ ), 133.48 ( $\text{CH}^7$  of chromone), 134.26 ( $\text{C}_{\text{ipso}}$  of Ph), 150.81 ( $\text{C}^3$ ), 153.52 (C=O), 154.40 ( $\text{CH}^2$  of chromone), 159.84 ( $\text{C}^{8a}$  of chromone), 161.36 (C=O), 163.46 (C=O), 174.23 (C-NH<sub>2</sub>), 174.28 (C=O).

**(2E,4E)-2-[Amino(1,3-dimethyl-2,4,6-trioxotetrahydro-5(2H)-pyrimidinylidene)methyl]-5-(6-chloro-4-oxo-4H-chromen-3-yl)-3-(2-chlorophenyl)-2,4-pentadienenitrile (3e).**

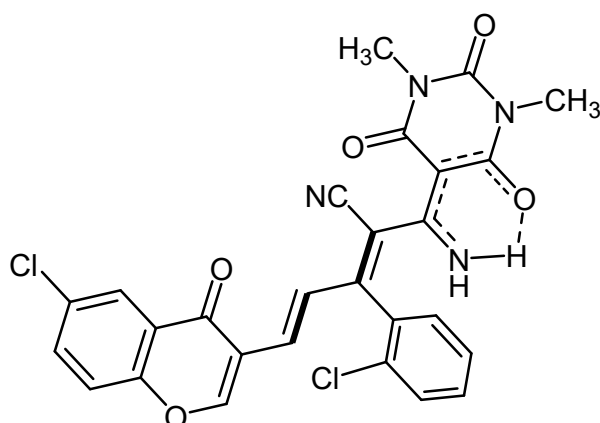

Cream powder, mp = 196-197 °C, 0.345 g, yield: 63%. IR (KBr) ( $\nu_{\max}$ ,  $\text{cm}^{-1}$ ): 3323 (NH), 2223 (CN), 1712, 1650 and 1610 (C=O), 1553 and 1467 (Ar). Anal. Calcd. for  $\text{C}_{27}\text{H}_{18}\text{Cl}_2\text{N}_4\text{O}_5$  (549.36): C, 59.03; H, 3.30; N, 10.20%. Found: C, 58.98; H, 3.27; N, 10.16%. MS (EI, 70 eV):  $m/z$  (%) = 548

(1), 535 (9), 411 (58), 409 (100), 357 (55), 205 (95), 126 (40), 98 (18), 75 (20), 63 (26).  $^1\text{H}$  NMR (300.13 MHz, DMSO- $d_6$ ):  $\delta_{\text{H}}$  3.06 (3H, s, CH<sub>3</sub>), 3.13 (3H, s, CH<sub>3</sub>), 6.10 (1H, d,  $^3J_{\text{HH}} = 16.4$  Hz, CH<sup>4</sup>), 6.98 (1H, d,  $^3J_{\text{HH}} = 7.5$  Hz, CH of Ar), 7.34-7.65 (3H, m, 3 CH of Ar), 7.74 (1H, d,  $^3J_{\text{HH}} = 16.2$  Hz, CH<sup>5</sup>), 7.76 (1H, d,  $^3J_{\text{HH}} = 9.2$  Hz, CH<sup>8</sup> of chromone), 7.88 (1H, dd,  $^3J_{\text{HH}} = 9.0$  Hz,  $^4J_{\text{HH}} = 2.6$  Hz, CH<sup>7</sup> of chromone), 8.11 (1H, d,  $^4J_{\text{HH}} = 2.6$  Hz, CH<sup>5</sup> of chromone), 8.71 (1H, s, CH<sup>2</sup> of chromone), 9.23 (1H, bs, NH), 10.40 (1H, bs, NH).  $^{13}\text{C}$  NMR (75.00 MHz, DMSO- $d_6$ ):  $\delta_{\text{C}}$  27.61 (CH<sub>3</sub>), 27.44 (CH<sub>3</sub>), 82.02 (C<sup>5</sup>), 106.24 (C-CN), 115.70 (CN), 118.67 (CH<sup>8</sup> of chromone), 119.71 (C<sup>3</sup> of chromone), 121.23 (C<sup>4a</sup> of chromone), 124.58 (CH<sup>5</sup> of chromone), 126.60 (CH of Ar), 127.19 (CH<sup>4</sup>), 129.38 (CH of Ar), 129.85 (CH of Ar), 130.47 (CH of Ar), 130.89 (C<sub>ipso</sub> of Ar), 131.09 (C<sub>ipso</sub>-Cl), 132.03 (C<sub>ipso</sub>-Cl), 132.15 (CH<sup>5</sup>), 134.13 (CH<sup>7</sup> of chromone), 150.80 (C<sup>3</sup>), 153.55 (C=O), 153.55 (CH<sup>2</sup> of chromone), 158.13 (C<sup>8a</sup> of chromone), 160.78 (C=O), 164.66 (C=O), 168.24 (C-NH<sub>2</sub>), 174.39 (C=O).

**(2E,4E)-2-[Amino(1,3-dimethyl-2,4,6-trioxotetrahydro-5(2H)-pyrimidinylidene)methyl]-5-(6-chloro-4-oxo-4H-chromen-3-yl)-3-(2-chlorophenyl)-2,4-pentadienenitrile (3'e).**

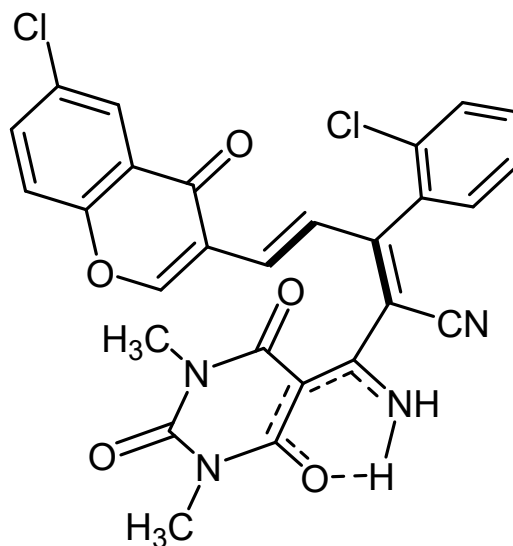

Cream powder, mp = 196-197 °C, 0.345 g, yield: 63%. IR (KBr) ( $\nu_{\text{max}}$ ,  $\text{cm}^{-1}$ ): 3323 (NH), 2223 (CN), 1712, 1650 and 1610 (C=O), 1553 and 1467 (Ar). Anal. Calcd. for C<sub>27</sub>H<sub>18</sub>Cl<sub>2</sub>N<sub>4</sub>O<sub>5</sub> (549.36): C, 59.03; H, 3.30; N, 10.20%. Found: C, 58.98; H, 3.27; N, 10.16%. MS (EI, 70 eV):  $m/z$  (%) = 548

(1), 535 (9), 411 (58), 409 (100), 357 (55), 205 (95), 126 (40), 98 (18), 75 (20), 63 (26).  $^1\text{H}$  NMR (300.13 MHz, DMSO- $d_6$ ):  $\delta_{\text{H}}$  3.09 (3H, s, CH<sub>3</sub>), 3.16 (3H, s, CH<sub>3</sub>), 6.04 (1H, d,  $^3J_{\text{HH}} = 15.5$  Hz, CH<sup>4</sup>), 7.34-7.65 (4H, m, 4 CH of Ar), 7.76 (1H, d,  $^3J_{\text{HH}} = 9.2$  Hz, CH<sup>8</sup> of chromone), 7.85 (1H, dd,  $^3J_{\text{HH}} = 9.7$  Hz,  $^4J_{\text{HH}} = 2.6$  Hz, CH<sup>7</sup> of chromone), 7.99 (1H, d,  $^4J_{\text{HH}} = 2.5$  Hz, CH<sup>5</sup> of chromone), 8.54 (1H, d,  $^3J_{\text{HH}} = 15.6$  Hz, CH<sup>5</sup>), 8.71 (1H, s, CH<sup>2</sup> of chromone), 9.52 (1H, bs, NH), 9.93 (1H, bs, NH).  $^{13}\text{C}$  NMR (75.00 MHz, DMSO- $d_6$ ):  $\delta_{\text{C}}$  27.23 (CH<sub>3</sub>), 28.01 (CH<sub>3</sub>), 82.02 (C<sup>5</sup>), 106.24 (C-CN), 115.09 (CN), 118.78 (CH<sup>8</sup> of chromone), 119.71 (C<sup>3</sup> of chromone), 120.86 (C<sup>4a</sup> of chromone), 124.58 (CH<sup>5</sup> of chromone), 126.49 (CH of Ar), 127.72 (CH<sup>4</sup>), 129.72 (CH of Ar), 130.08 (CH of Ar), 130.47 (CH of Ar), 130.84 (CH<sup>5</sup>), 131.17 (C<sub>ipso</sub>-Cl), 131.94 (C<sub>ipso</sub>-Cl), 132.10 (C<sub>ipso</sub> of Ar), 134.56 (CH<sup>7</sup> of chromone), 150.80 (C<sup>3</sup>), 153.55 (C=O), 153.55 (CH<sup>2</sup> of chromone), 158.13 (C<sup>8a</sup> of chromone), 160.78 (C=O), 164.66 (C=O), 168.24 (C-NH<sub>2</sub>), 174.25 (C=O).

**[(2E)-1-(2-Chlorophenyl)-3-(4-oxo-4H-chromen-3-yl)-2-propen-1-ylidene]malononitrile (3f).**

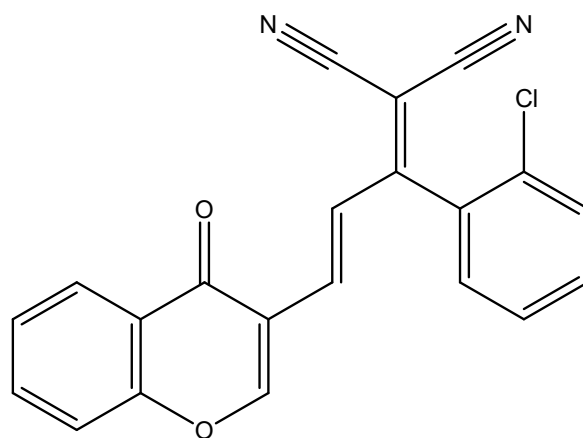

Yellow powder, mp = 234-235 °C, 0.268 g, yield: 75%. IR (KBr) ( $\nu_{\text{max}}$ , cm<sup>-1</sup>): 2225 (CN), 1653 and 1618 (C=O), 1563 and 1466 (Ar). Anal. Calcd. for C<sub>21</sub>H<sub>11</sub>ClN<sub>2</sub>O<sub>2</sub> (358.78): C, 70.30; H, 3.09; N, 7.81%. Found: C, 70.26; H, 2.97; N, 7.78%. MS (EI, 70 eV):  $m/z$  (%) = 358 (28), 323 (60), 295 (15), 171 (100), 120 (13), 92 (45), 64 (18).  $^1\text{H}$  NMR (300.13 MHz, DMSO- $d_6$ ):  $\delta_{\text{H}}$  6.60 (1H, d,  $^3J_{\text{HH}} = 15.2$  Hz, CH<sup>3</sup>), 7.51 (1H, t,  $^3J_{\text{HH}} = 7.9$  Hz, CH<sup>8</sup> of chromone), 7.57 (1H, t,  $^3J_{\text{HH}} = 7.8$  Hz, CH<sup>6</sup> of chromone), 7.60 (1H, d,  $^3J_{\text{HH}} = 7.7$  Hz, CH of Ar), 7.65 (1H, t,  $^3J_{\text{HH}} = 7.7$  Hz, CH of Ar), 7.70 (1H, d,  $^3J_{\text{HH}} = 7.9$  Hz, CH of Ar), 7.73 (1H, d,  $^3J_{\text{HH}} = 7.8$  Hz, CH of Ar), 7.85 (1H, t,  $^3J_{\text{HH}} = 7.9$  Hz, CH<sup>7</sup>

of chromone), 8.17 (1H, d,  $^3J_{\text{HH}} = 8.0$  Hz, CH<sup>5</sup> of chromone), 8.66 (1H, d,  $^3J_{\text{HH}} = 15.3$  Hz, CH<sup>2</sup>), 8.87 (1H, s, CH<sup>2</sup> of chromone). <sup>13</sup>C NMR (75.00 MHz, DMSO-*d*<sub>6</sub>):  $\delta_{\text{C}}$  83.35 (C-CN), 112.38 (CN), 112.99 (CN), 118.16 (C<sup>3</sup> of chromone), 118.62 (CH<sup>8</sup> of chromone), 123.50 (C<sup>4a</sup> of chromone), 125.53 (CH<sup>6</sup> of chromone), 125.61 (CH<sup>5</sup> of chromone), 126.50 (CH of Ar), 127.93 (CH of Ar), 130.16 (CH of Ar), 130.57 (CH of Ar), 131.08 (C<sub>ipso</sub> of Ar), 131.51 (C<sub>ipso</sub>-Cl), 132.29 (CH<sup>2</sup>), 134.88 (CH<sup>7</sup> of chromone), 141.47 (CH<sup>3</sup>), 154.83 (CH<sup>2</sup> of chromone), 163.60 (C<sup>8a</sup> of chromone), 169.82 (C<sup>1</sup>), 175.32 (C=O).

**[(2*E*)-3-(6-Chloro-4-oxo-4*H*-chromen-3-yl)-1-phenyl-2-propen-1-ylidene]malononitrile (3g).**

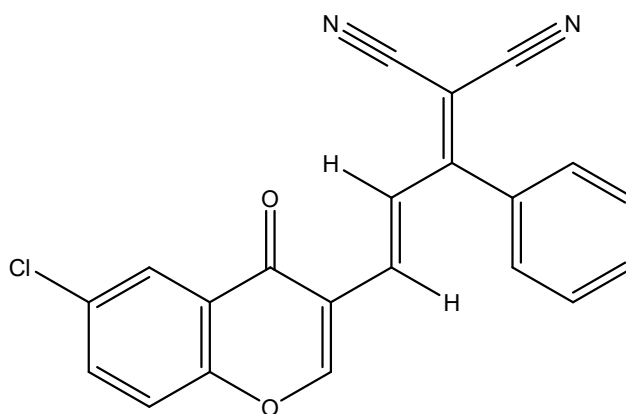

Yellow powder, mp = 233-234 °C, 0.279 g, yield: 78%. IR (KBr) ( $\nu_{\text{max}}$ , cm<sup>-1</sup>): 2229 (CN), 1647 and 1607 (C=O), 1559 and 1467 (Ar). Anal. Calcd. for C<sub>21</sub>H<sub>11</sub>ClN<sub>2</sub>O<sub>2</sub> (358.78): C, 70.30; H, 3.09; N, 7.81%. Found: C, 70.27; H, 2.98; N, 7.77%. MS (EI, 70 eV): *m/z* (%) = 358 (28), 323 (60), 295 (15), 171 (100), 120 (13), 92 (45), 64 (18). <sup>1</sup>H NMR (300.13 MHz, DMSO-*d*<sub>6</sub>):  $\delta_{\text{H}}$  6.68 (1H, d,  $^3J_{\text{HH}} = 15.3$  Hz, CH<sup>3</sup>), 7.49 (2H, t,  $^3J_{\text{HH}} = 7.0$  Hz, 2 CH<sub>meta</sub> of Ph), 7.61 (2H, d,  $^3J_{\text{HH}} = 7.1$  Hz, 2 CH<sub>ortho</sub> of Ph), 7.62 (1H, t,  $^3J_{\text{HH}} = 7.0$  Hz, CH<sub>para</sub> of Ph), 7.78 (1H, d,  $^3J_{\text{HH}} = 9.0$  Hz, CH<sup>8</sup> of chromone), 7.89 (1H, dd,  $^3J_{\text{HH}} = 8.9$  Hz,  $^4J_{\text{HH}} = 2.6$  Hz, CH<sup>7</sup> of chromone), 8.09 (1H, d,  $^3J_{\text{HH}} = 2.6$  Hz, CH<sup>5</sup> of chromone), 8.60 (1H, d,  $^3J_{\text{HH}} = 15.4$  Hz, CH<sup>2</sup>), 8.87 (1H, s, CH<sup>2</sup> of chromone). <sup>13</sup>C NMR (75.00 MHz, DMSO-*d*<sub>6</sub>):  $\delta_{\text{C}}$  81.92 (C-CN), 113.06 (CN), 113.86 (CN), 118.35 (CH<sup>8</sup> of chromone), 121.31 (C<sup>3</sup> of chromone), 124.51 (C<sup>4a</sup> of chromone), 124.69 (CH<sup>5</sup> of chromone), 126.90 (2 CH<sub>meta</sub> of Ph), 129.07 (2CH<sub>ortho</sub> of Ph), 129.39 (CH<sub>para</sub> of Ph), 130.89 (CH<sup>2</sup>), 131.19 (C<sub>ipso</sub>-Cl), 132.51 (CH<sup>7</sup> of

chromone), 134.66 ( $C_{ipso}$  of Ar), 141.11 ( $CH^3$ ), 153.47 ( $CH^2$  of chromone), 163.09 ( $C^{8a}$  of chromone), 171.88 ( $C^1$ ), 174.22 ( $C=O$ ).

**[(2E)-3-(6-Chloro-4-oxo-4H-chromen-3-yl)-1-(4-methoxyphenyl)-2-propen-1-ylidene]malononitrile (3h)**

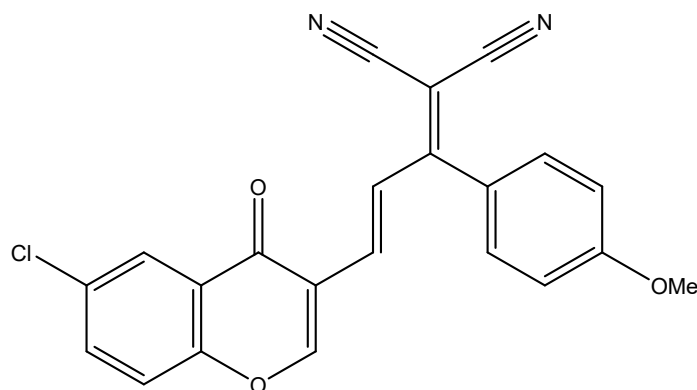

Yellow powder, mp = 238-234 °C, 0.314 g, yield: 81%. IR (KBr) ( $\nu_{max}$ ,  $cm^{-1}$ ): 2225 (CN), 1647 and 1600 ( $C=O$ ), 1560 and 1467 (Ar). Anal. Calcd. for  $C_{22}H_{13}ClN_2O_3$  (388.80): C, 67.96; H, 3.37; N, 7.21%. Found: C, 67.94; H, 3.35; N, 7.19%. MS (EI, 70 eV):  $m/z$  (%) = 388 (79), 361 (19), 323 (100), 205 (35), 164 (18), 126 (23), 63 (16).  $^1H$  NMR (300.13 MHz,  $DMSO-d_6$ ):  $\delta_H$  3.86 (3H, s,  $CH_3$ ), 6.76 (1H, d,  $^3J_{HH} = 15.4$  Hz,  $CH^3$ ), 7.16 (2H, d,  $^3J_{HH} = 8.8$  Hz, 2 CH of Ar), 7.47 (2H, d,  $^3J_{HH} = 8.8$  Hz, 2 CH of Ar), 7.79 (1H, d,  $^3J_{HH} = 9.0$  Hz,  $CH^8$  of chromone), 7.90 (1H, dd,  $^3J_{HH} = 9.0$  Hz,  $^4J_{HH} = 2.5$  Hz,  $CH^7$  of chromone), 8.11 (1H, d,  $^3J_{HH} = 2.5$  Hz,  $CH^5$  of chromone), 8.57 (1H, dd,  $^3J_{HH} = 15.3$  Hz,  $^4J_{HH} = 2.0$  Hz,  $CH^2$ ), 8.89 (1H, d,  $^4J_{HH} = 2.1$  Hz,  $CH^2$  of chromone).  $^{13}C$  NMR (75.00 MHz,  $DMSO-d_6$ ):  $\delta_C$  55.48 ( $CH_3$ ), 80.43 ( $C-CN$ ), 113.44 (CN), 114.33 (CN), 114.40 (2 CH of Ar), 118.46 ( $CH^8$  of chromone), 121.14 ( $C^3$  of chromone), 124.48 ( $CH^5$  of chromone), 124.61 ( $C^{4a}$  of chromone), 124.71 ( $CH^2$ ), 127.13 ( $C_{ipso}$  of Ar), 130.84 ( $C_{ipso}-Cl$ ), 131.29 (2 CH of Ar), 134.63 ( $CH^7$  of chromone), 140.95 ( $CH^2$ ), 153.49 ( $CH^2$  of chromone), 161.65 ( $C_{ipso}-OCH_3$ ), 162.92 ( $C^{8a}$  of chromone), 171.60 ( $C^1$ ), 174.26 ( $C=O$ ).



**[(2E)-3-(6-Chloro-4-oxo-4H-chromen-3-yl)-1-(2,3-dimethoxyphenyl)-2-propen-1-ylidene]malononitrile (3i)**

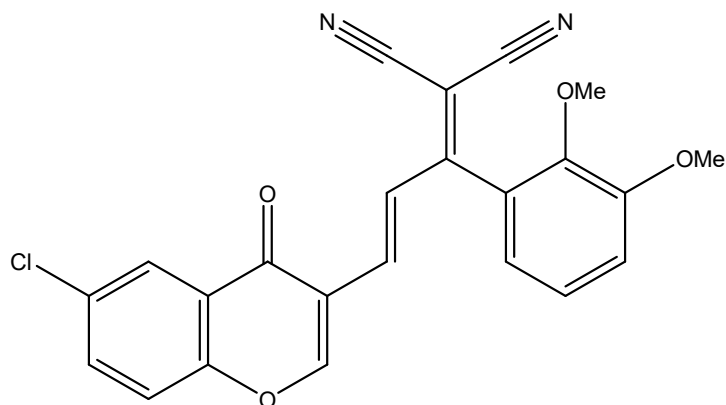

Yellow powder, mp = 237-239 °C, 0.259 g, yield: 62%. IR (KBr) ( $\nu_{\max}$ ,  $\text{cm}^{-1}$ ): 2215 (CN), 1664 and 1619 (C=O), 1580 and 1469 (Ar). Anal. Calcd. for  $\text{C}_{23}\text{H}_{15}\text{ClN}_2\text{O}_4$  (418.83): C, 65.96; H, 3.61; N, 6.69%. Found: C, 65.93; H, 3.58; N, 6.66%. MS (EI, 70 eV):  $m/z$  (%) = 418 (18), 370 (12), 260 (24), 217 (26), 190 (24), 154 (44), 126 (100), 98 (35), 63 (56).  $^1\text{H}$  NMR (300.13 MHz,  $\text{DMSO}-d_6$ ):  $\delta_{\text{H}}$  3.80 (3H, s,  $\text{CH}_3$ ), 3.81 (3H, s,  $\text{CH}_3$ ), 6.86 (1H, d,  $^3J_{\text{HH}} = 15.2$  Hz,  $\text{CH}^3$ ), 6.87 (1H, d,  $^3J_{\text{HH}} = 8.3$  Hz, CH of Ar), 7.12 (1H, t,  $^3J_{\text{HH}} = 8.0$  Hz, CH of Ar), 7.15 (1H, d,  $^3J_{\text{HH}} = 15.2$  Hz,  $\text{CH}^2$ ), 7.19 (1H, d,  $^3J_{\text{HH}} = 8.4$  Hz, CH of Ar), 7.90 (1H, d,  $^3J_{\text{HH}} = 9.0$  Hz,  $\text{CH}^8$  of chromone), 7.94 (1H, dd,  $^3J_{\text{HH}} = 9.0$  Hz,  $^4J_{\text{HH}} = 2.8$  Hz,  $\text{CH}^7$  of chromone), 8.08 (1H, d,  $^3J_{\text{HH}} = 2.7$  Hz,  $\text{CH}^5$  of chromone), 8.75 (1H, d,  $^4J_{\text{HH}} = 2.8$  Hz,  $\text{CH}^2$  of chromone). Due to the low solubility, the carbon spectrum could not be analyzed.

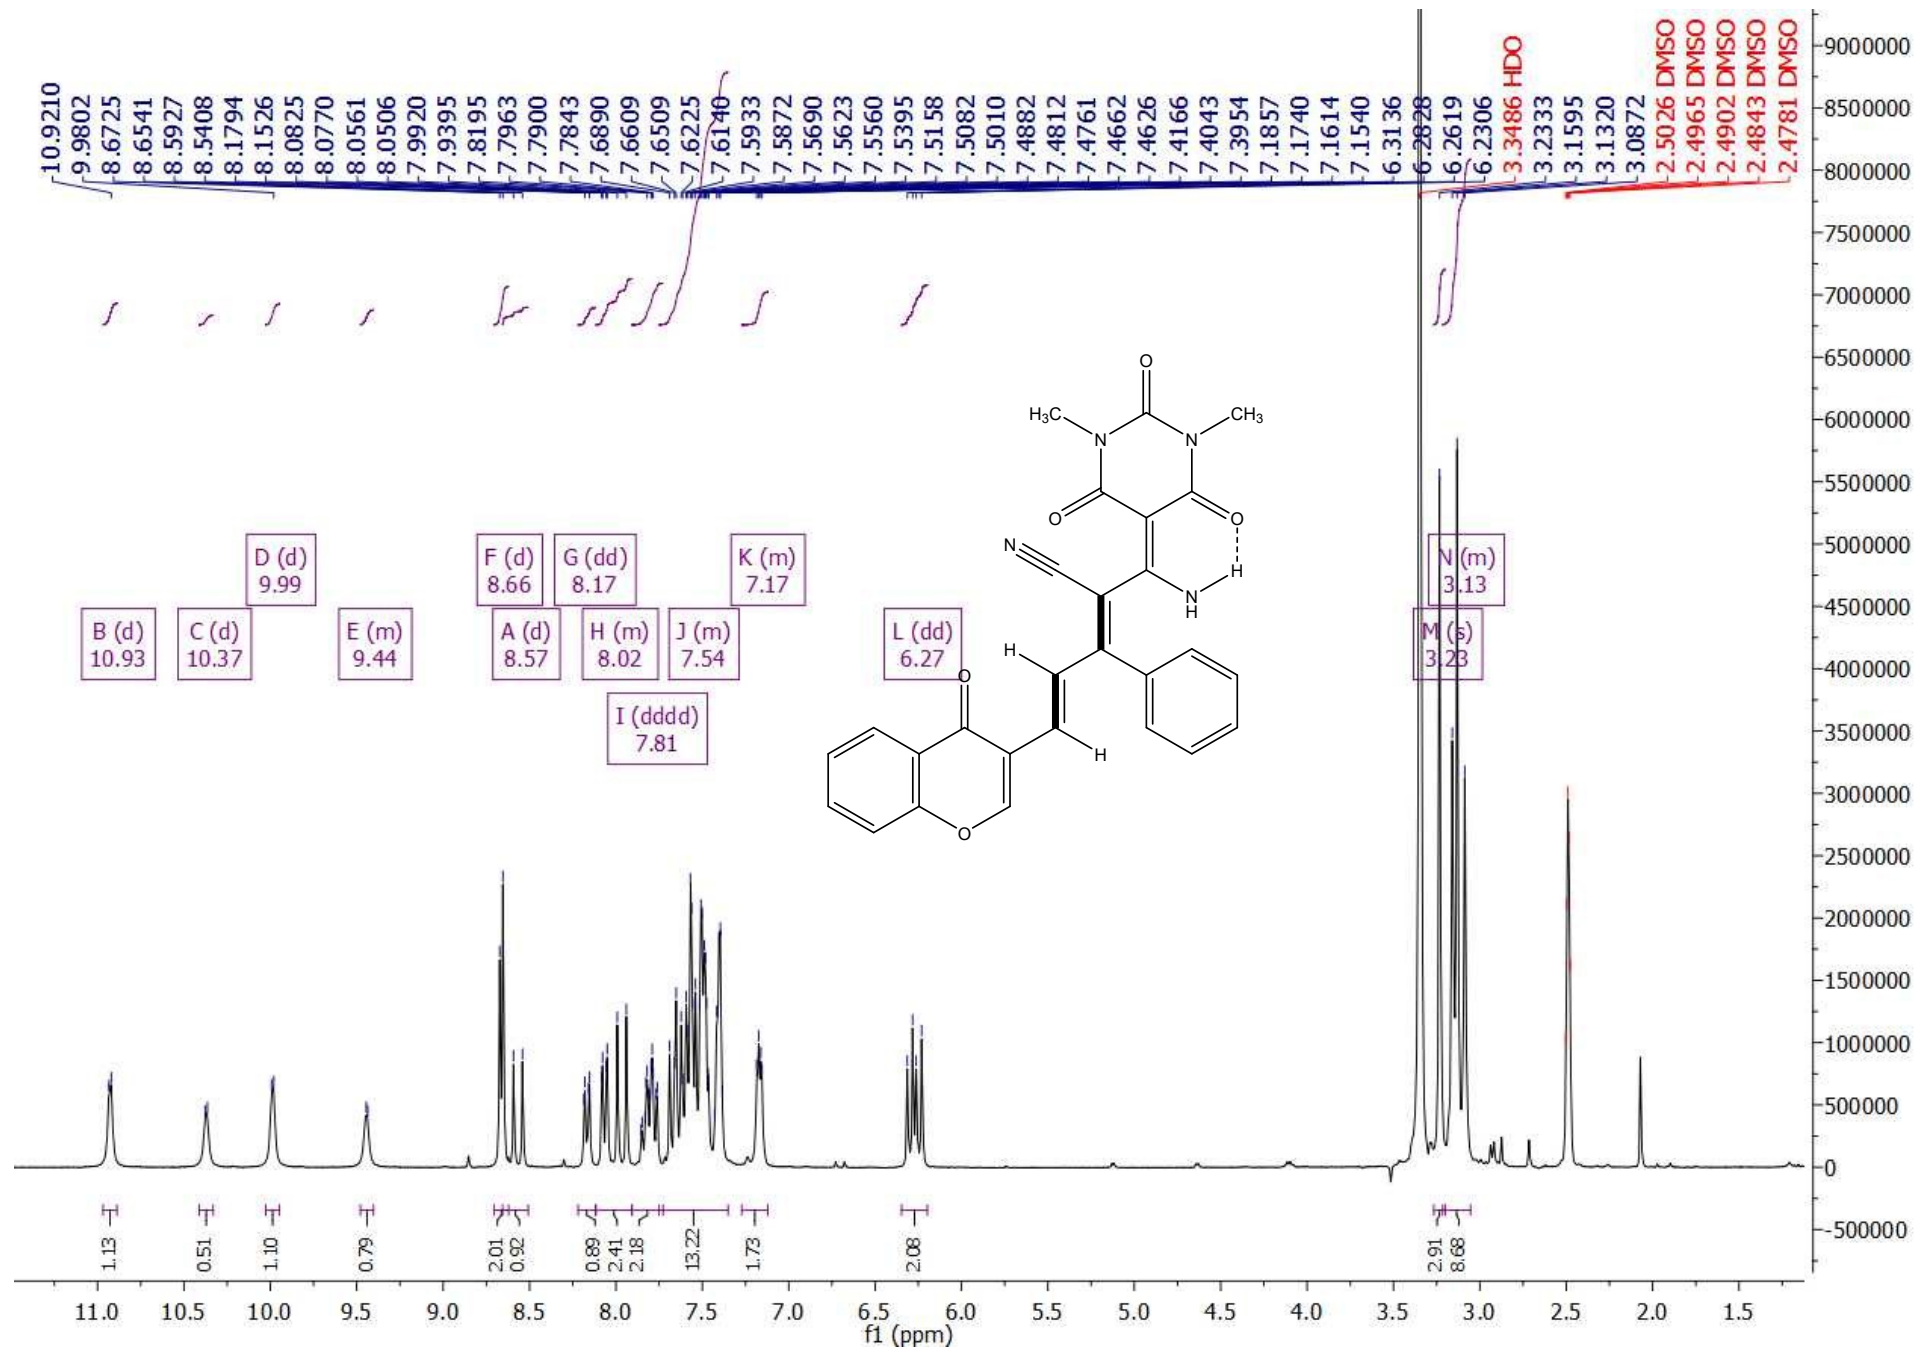

<sup>1</sup>H NMR of 3a

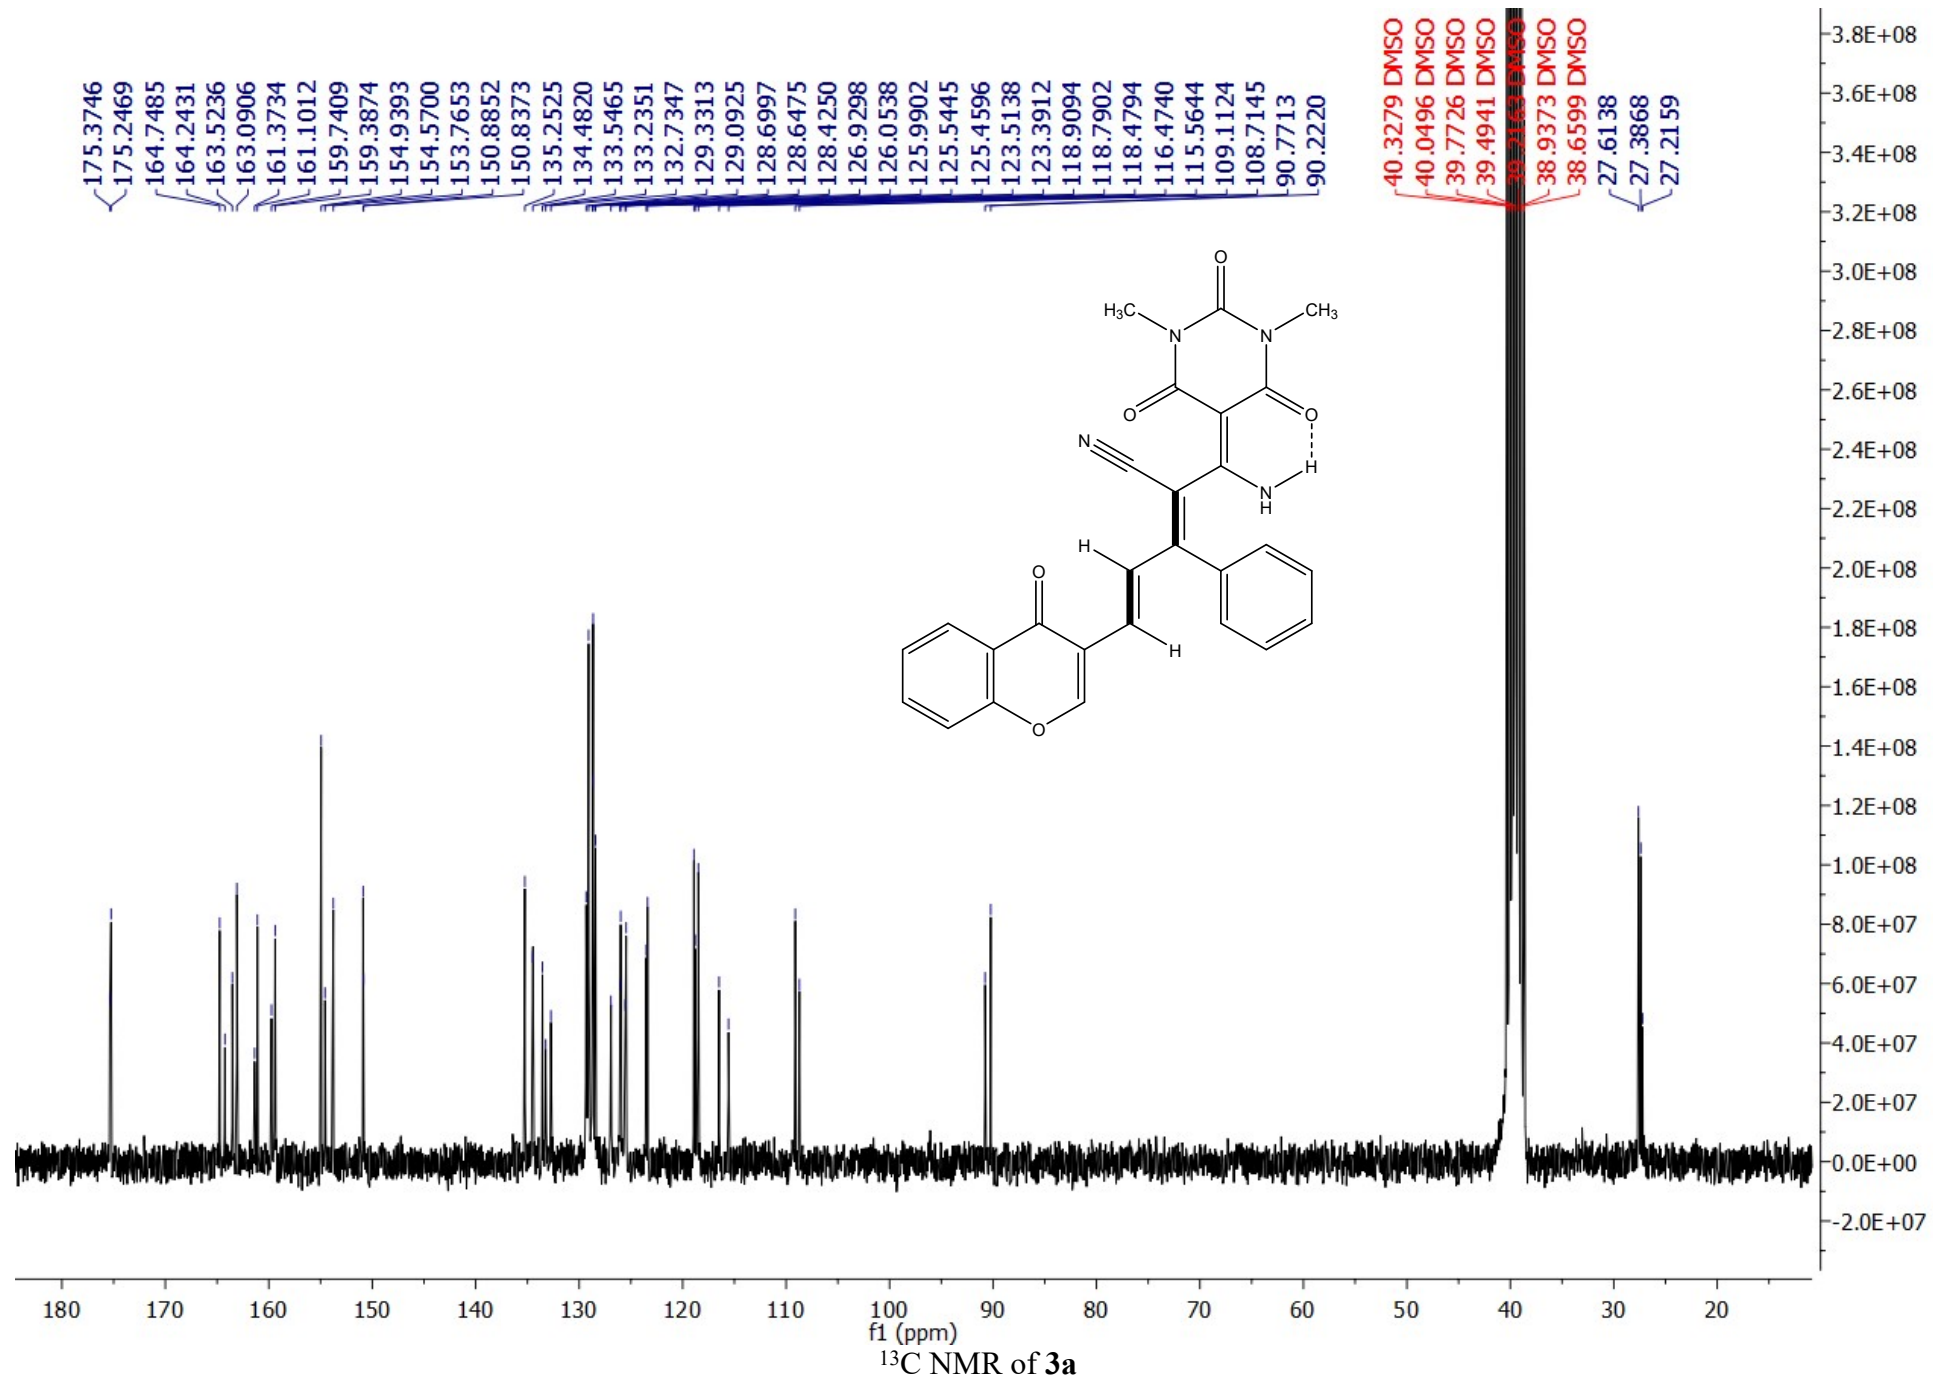

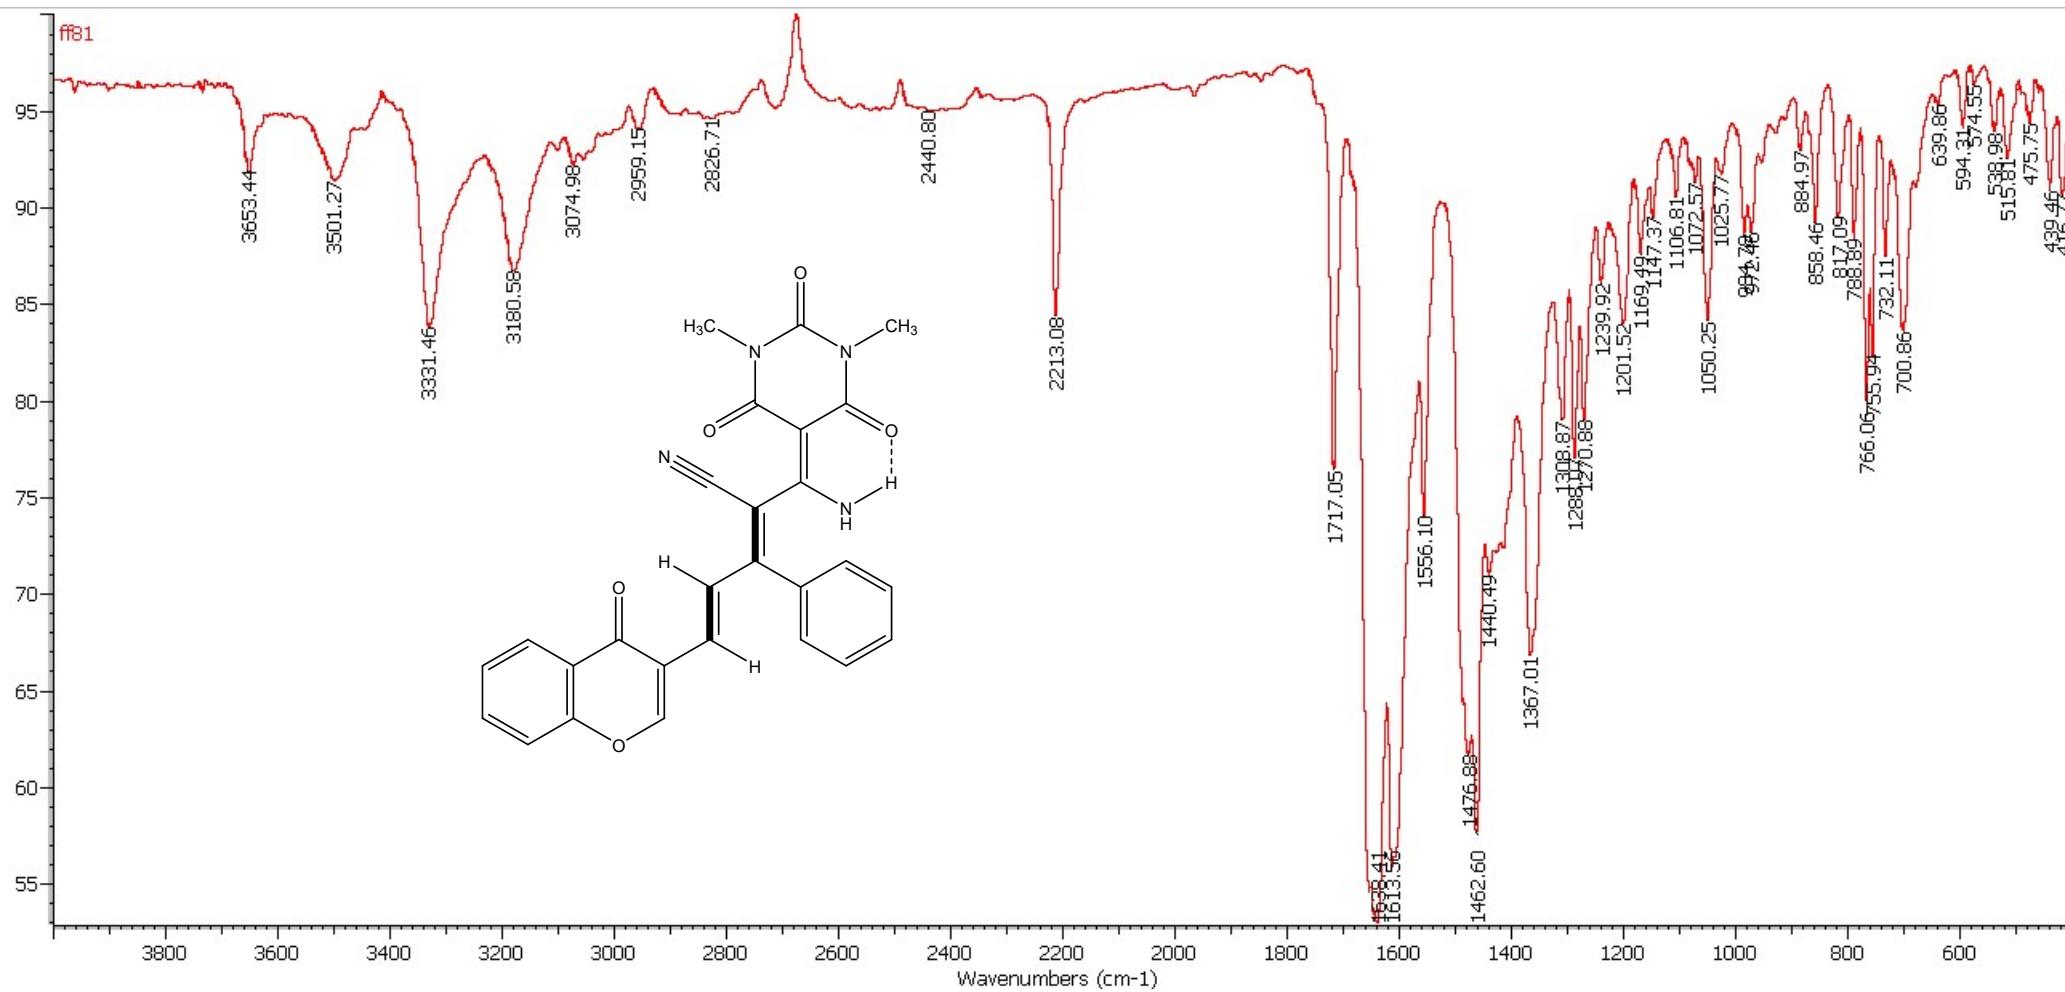

IR of 3a

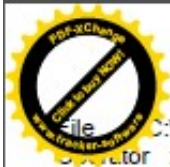

File: C:\MSDCHEM\3\DATA\Snapshot\FF75.d

Operator:

Acquired: 1 Feb 2021 11:14 using AcqMethod default.m

Instrument: DIRECT PROBE

Sample Name:

Misc Info:

Vial Number: 1

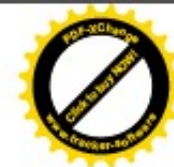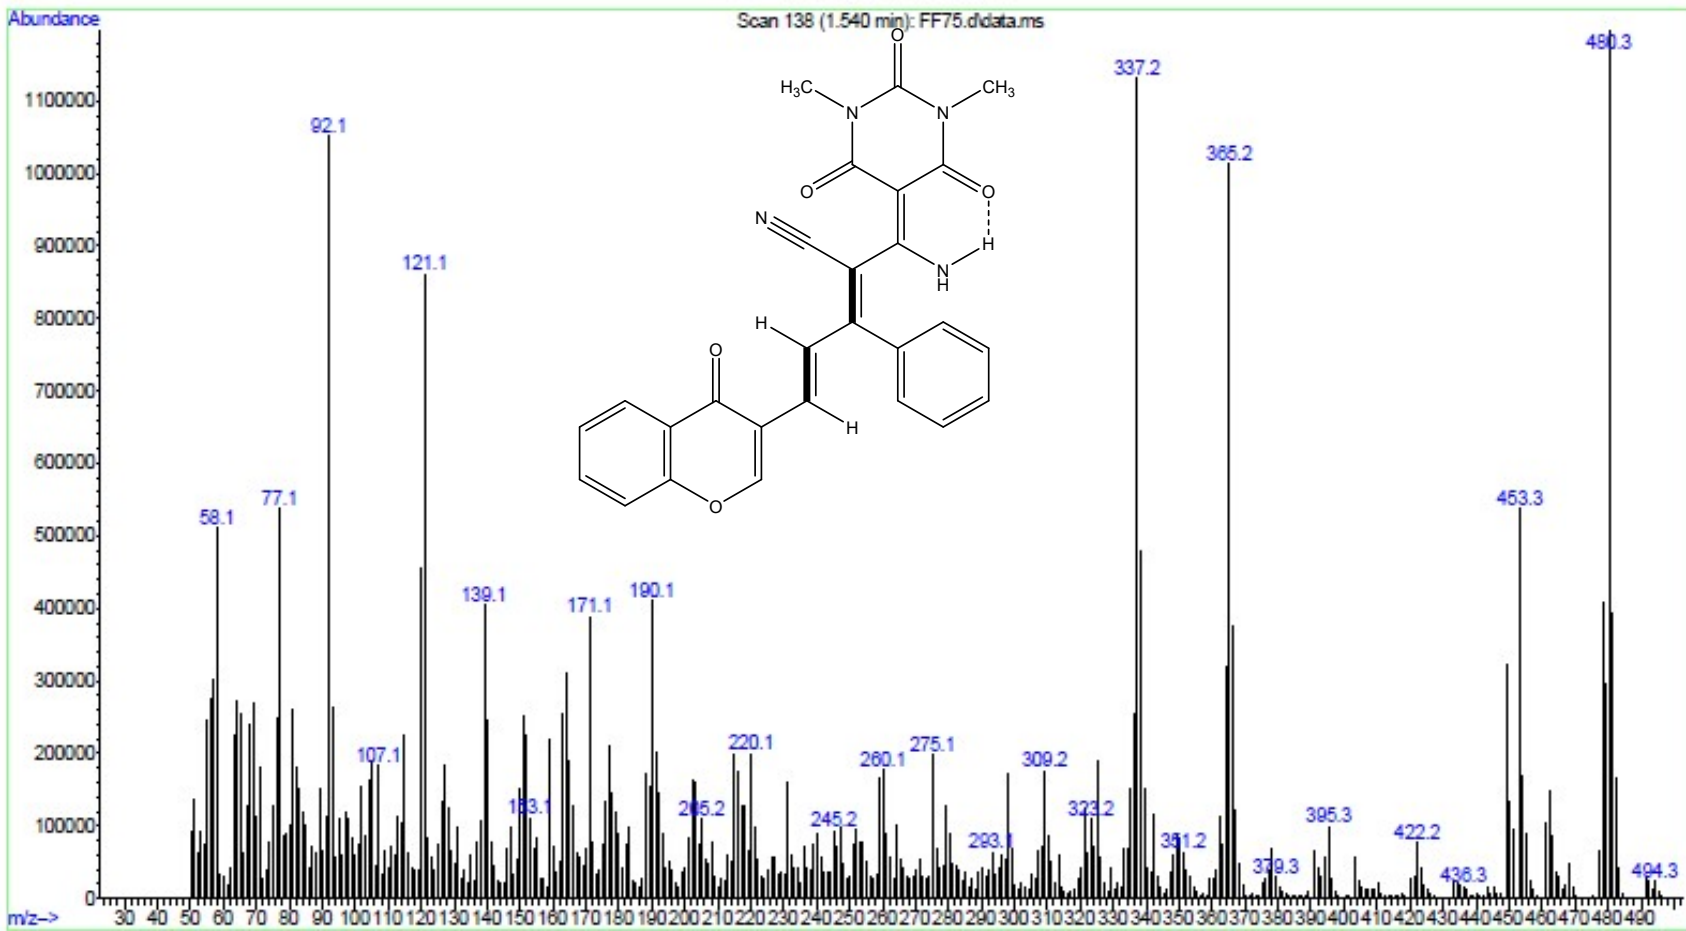

Mass of compound 3a

S21



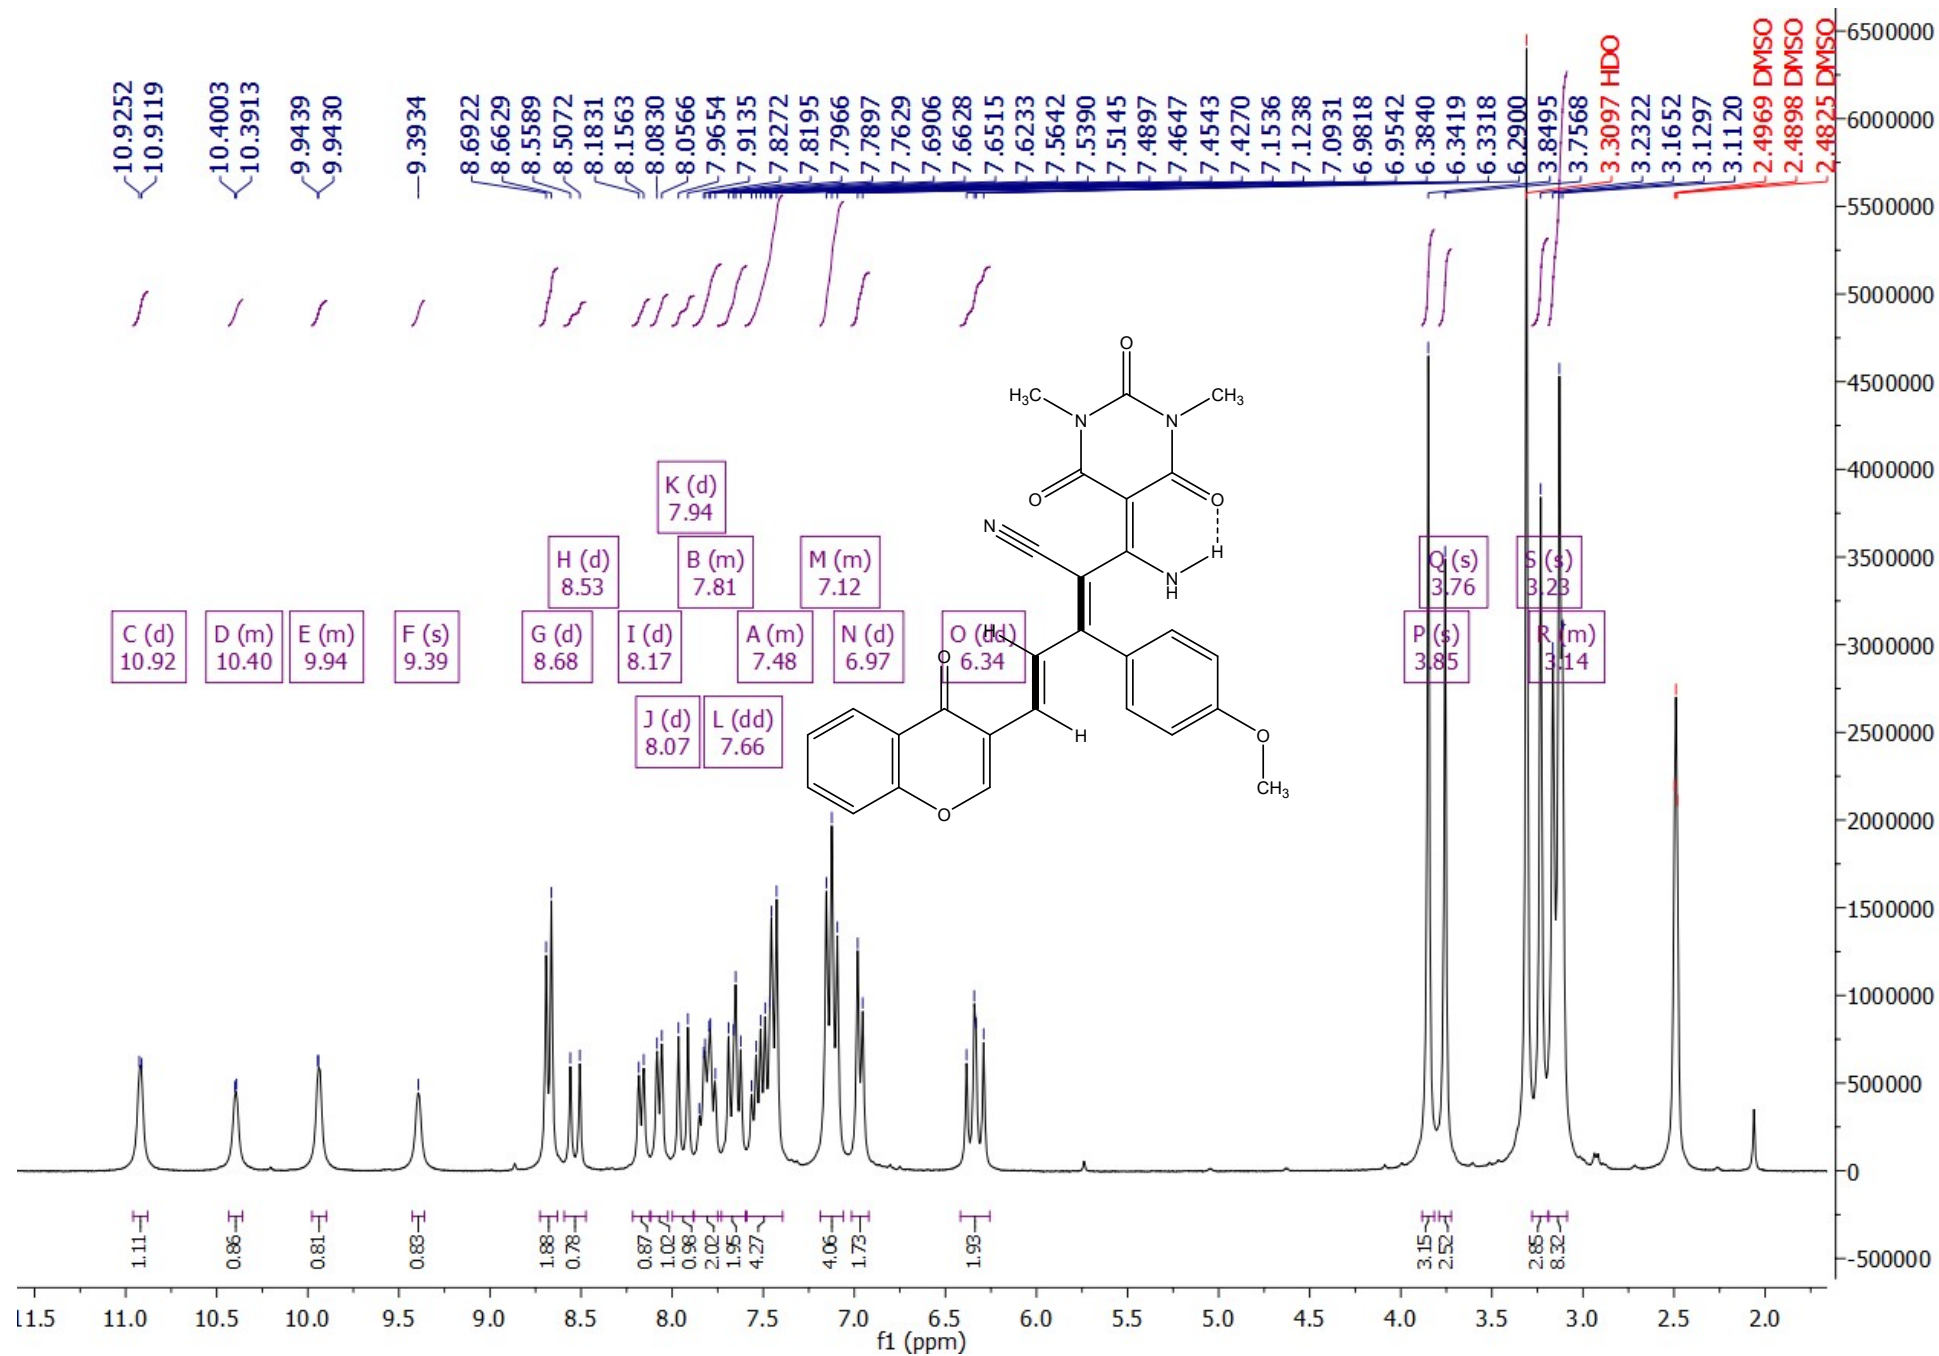

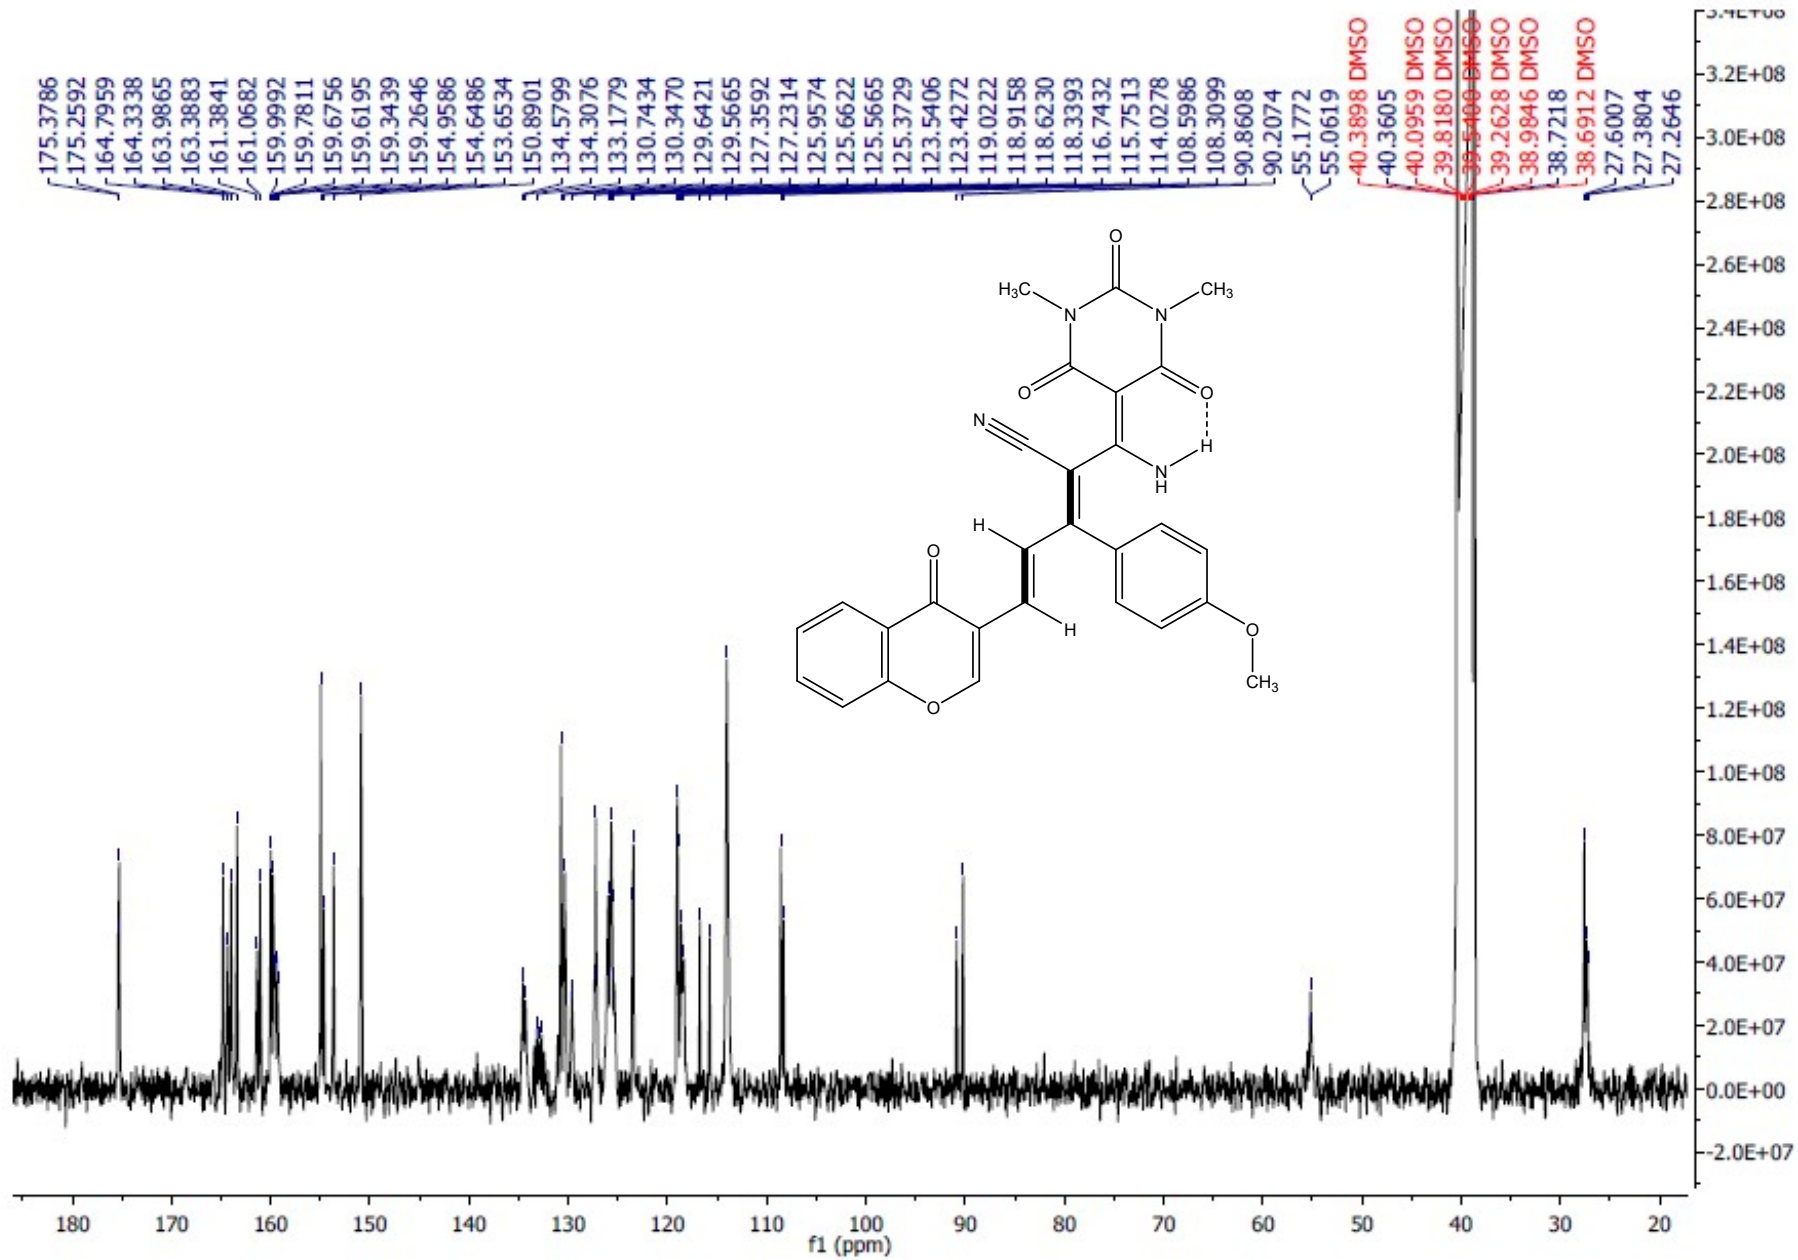

<sup>13</sup>C NMR of **3b**

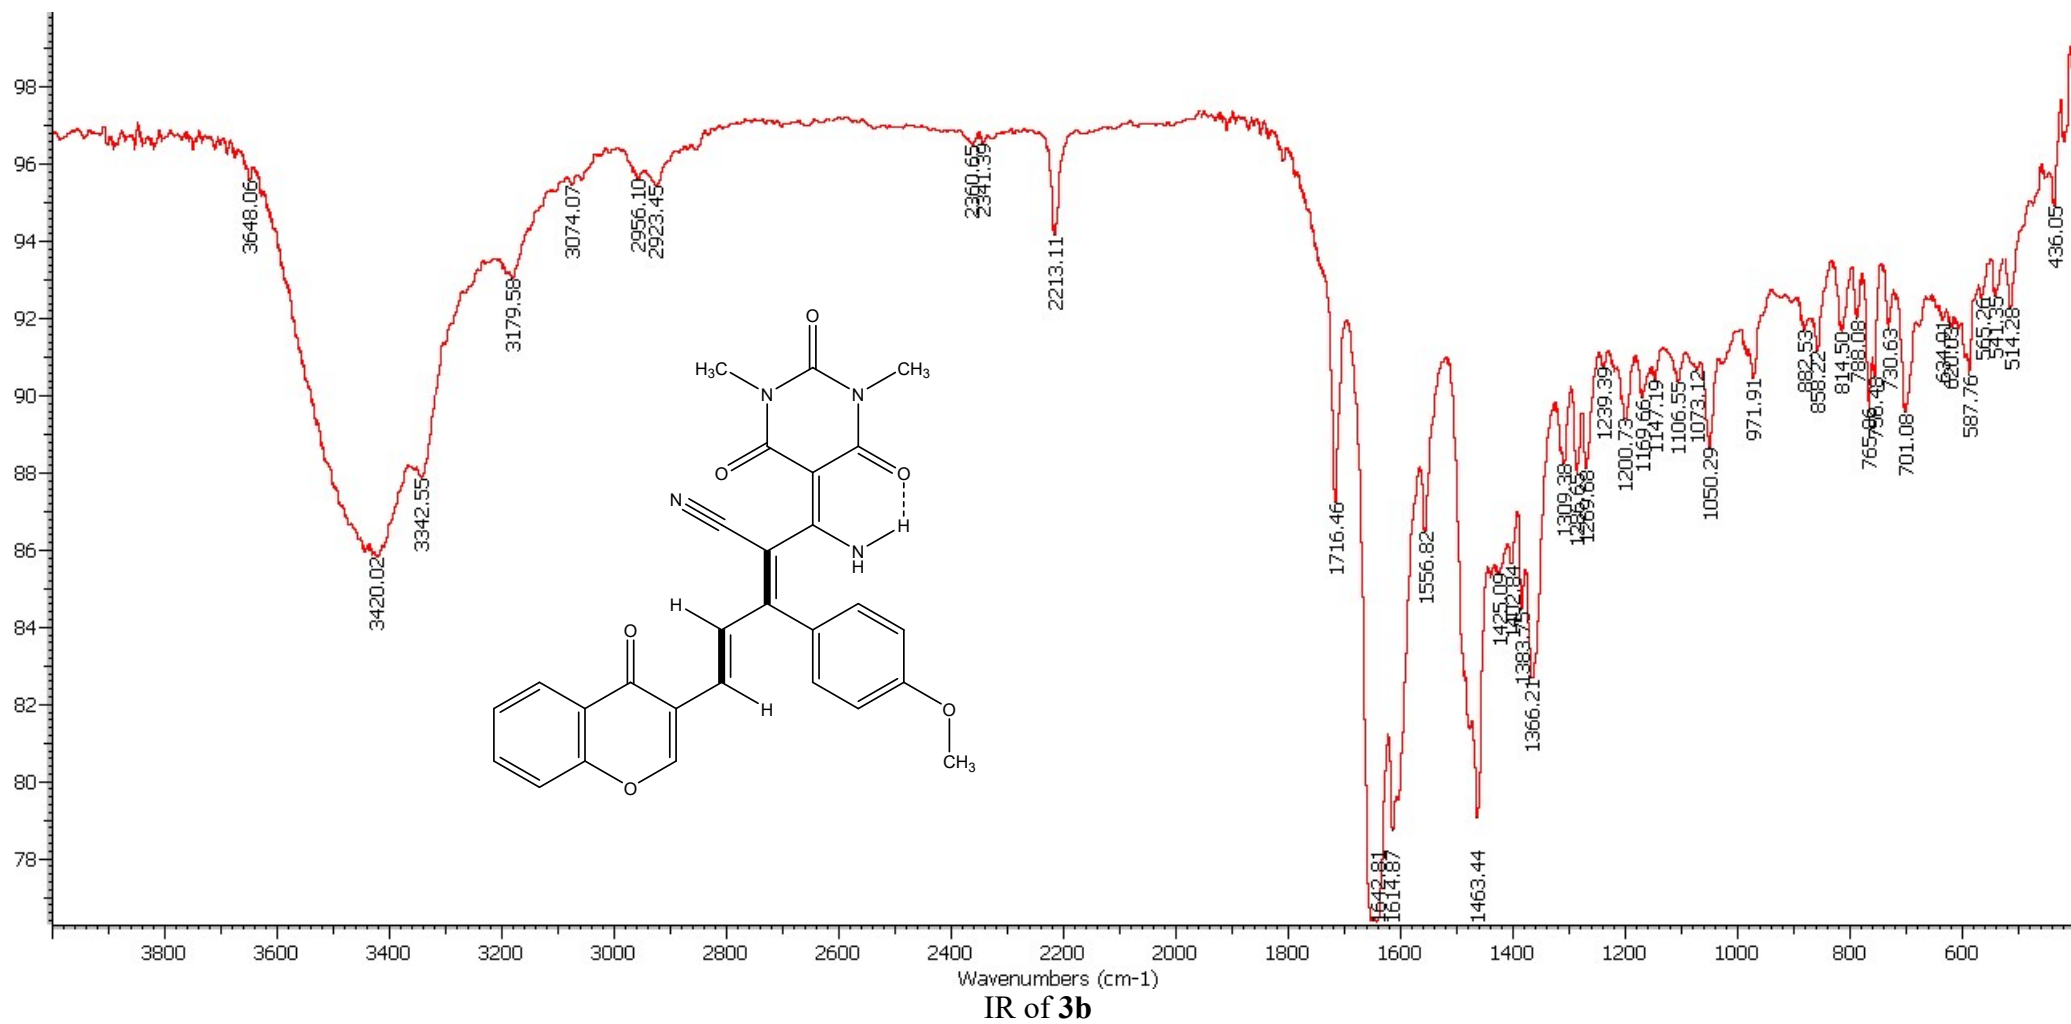



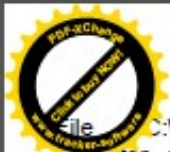

File: C:\MSDCHEM\3\DATA\Snapshot\FF-81-1.d

Operator:

Acquired: 6 Oct 2021 12:24 using AcqMethod default.m

Instrument: DIRECT PROBE

Sample Name:

Misc Info:

Vial Number: 1

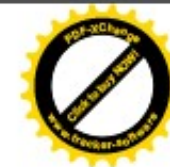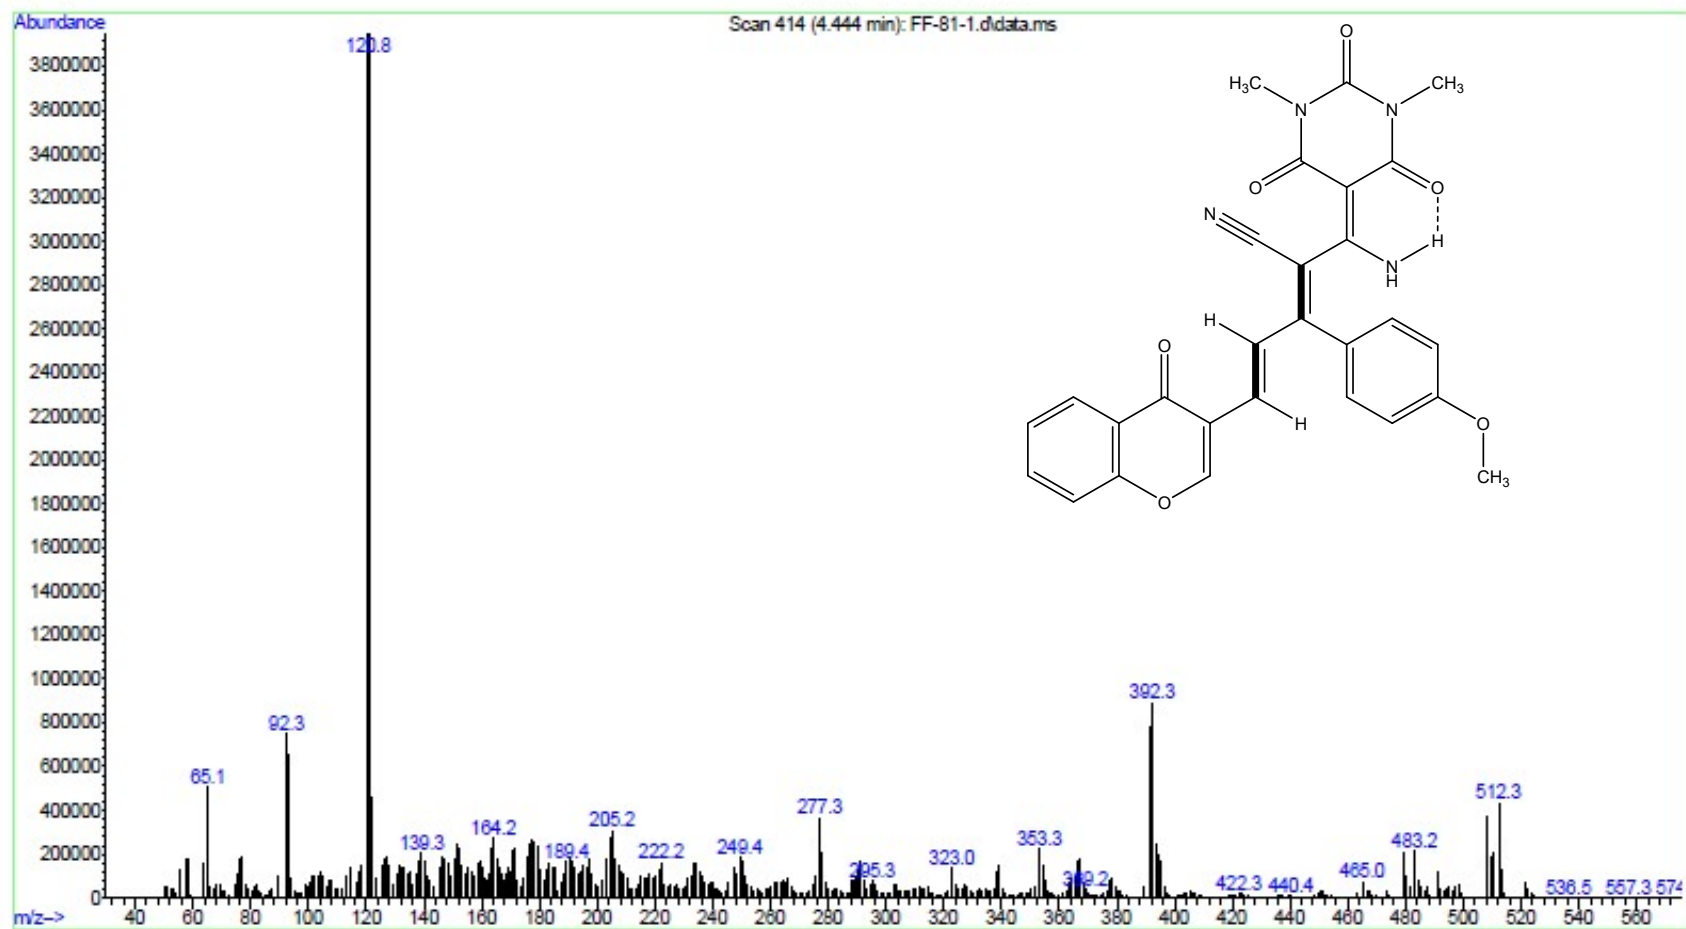

Mass of compound **3b**

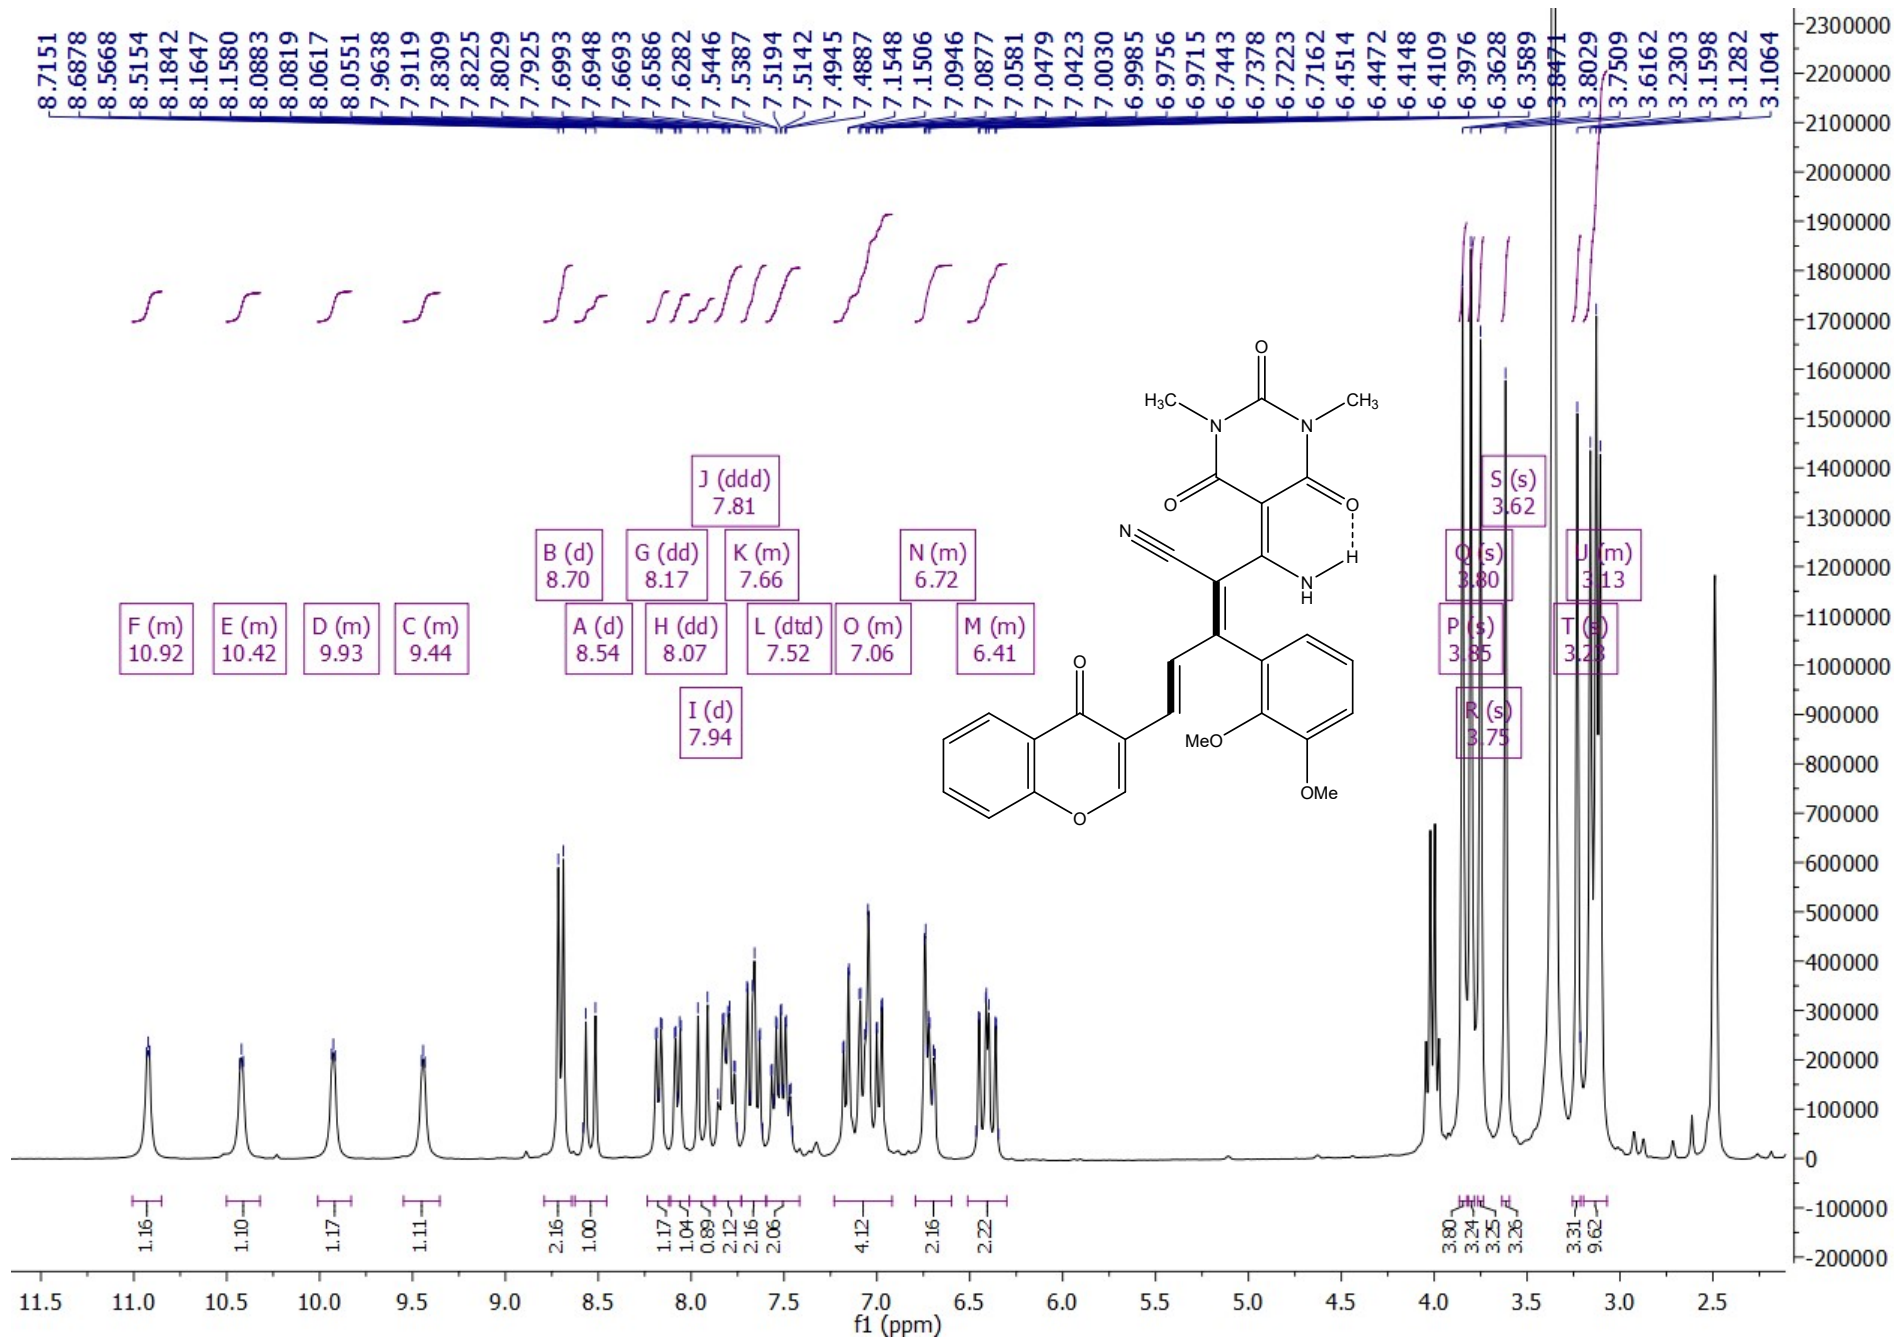

<sup>1</sup>H NMR of 3c

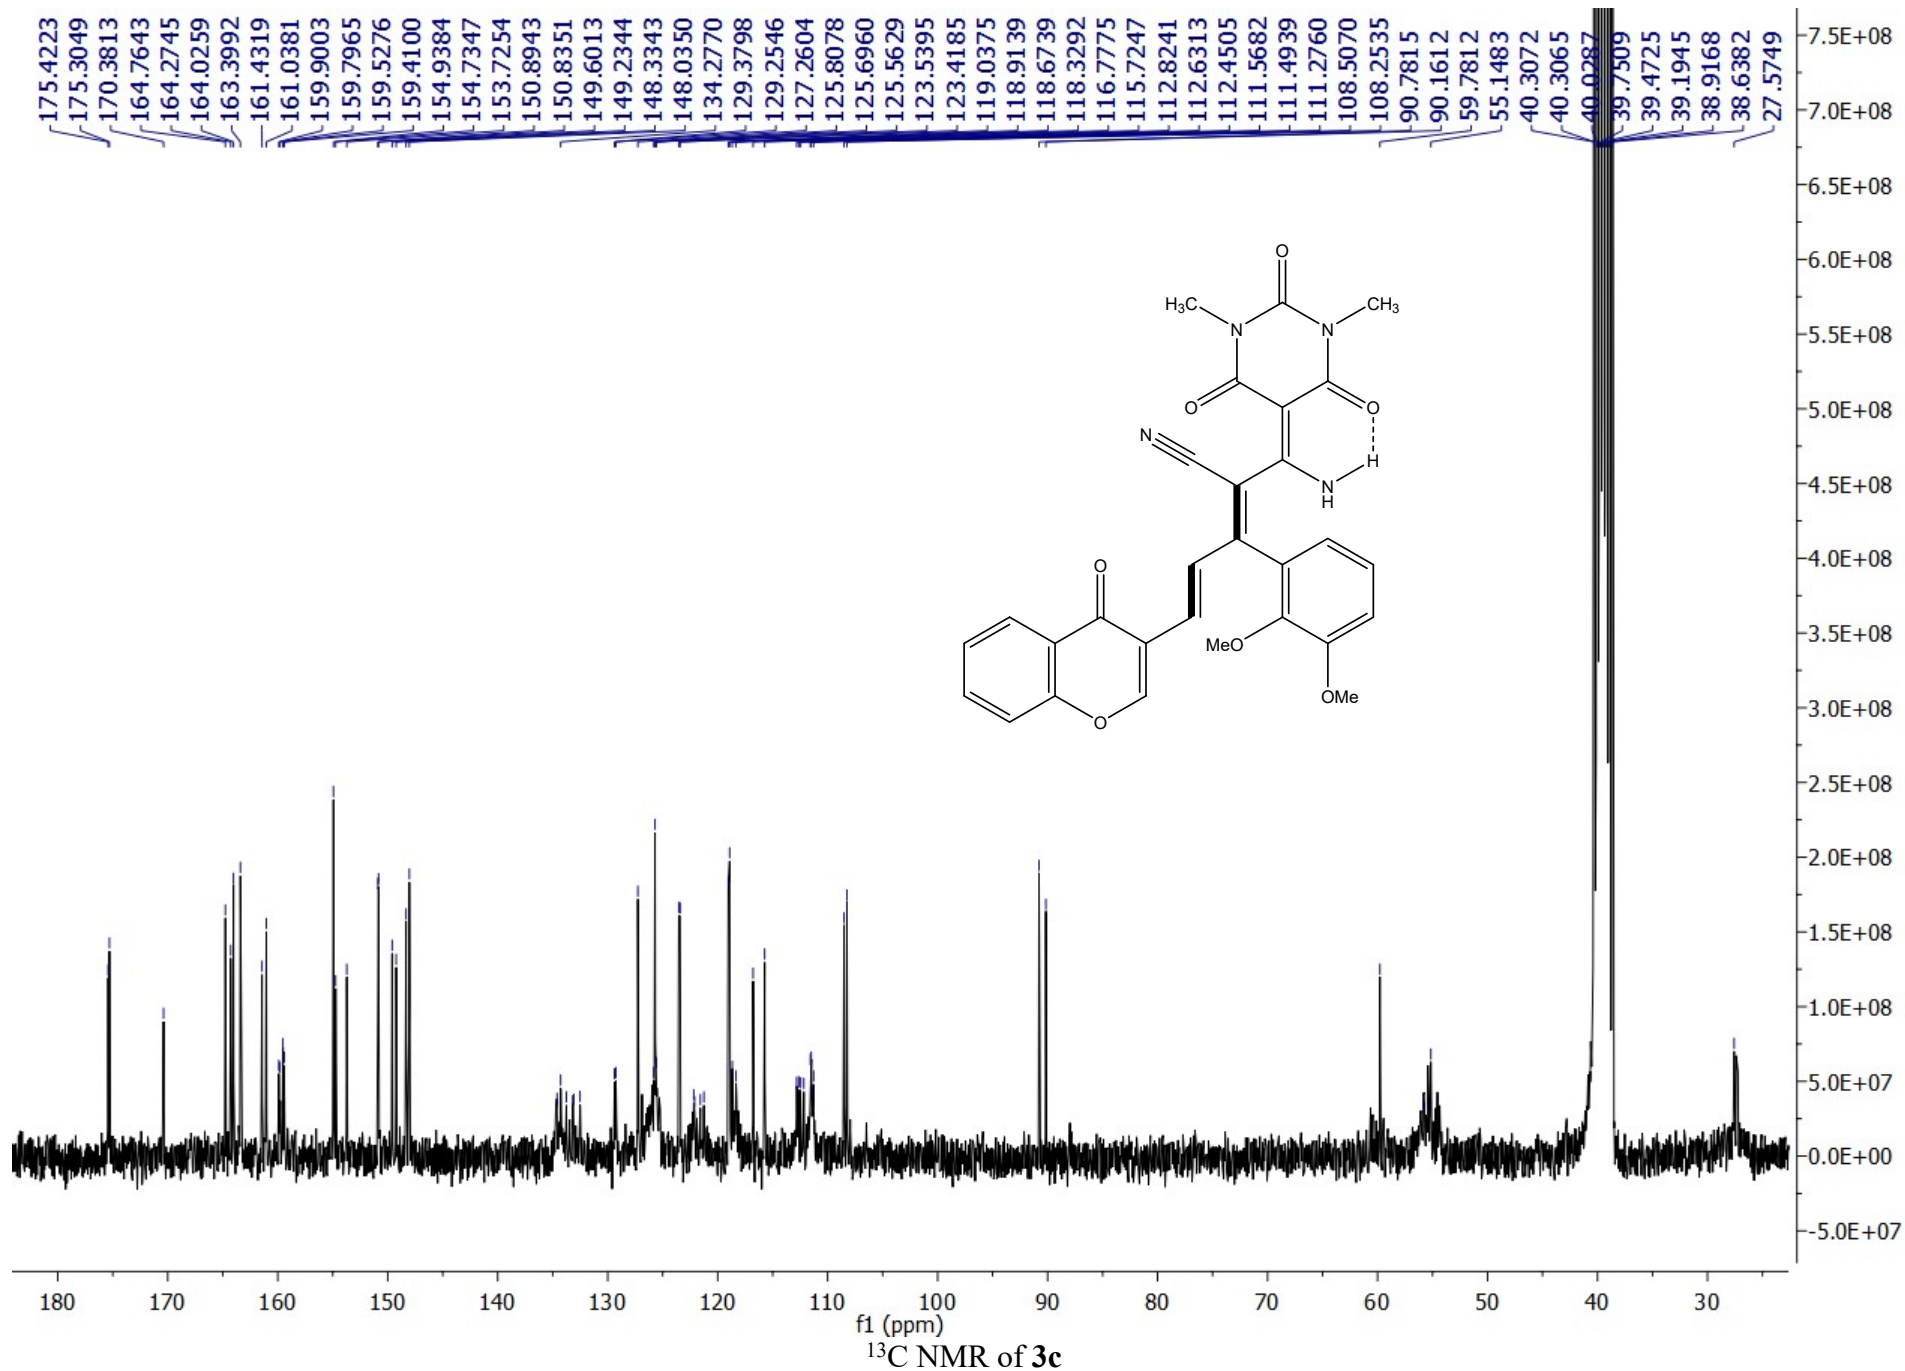

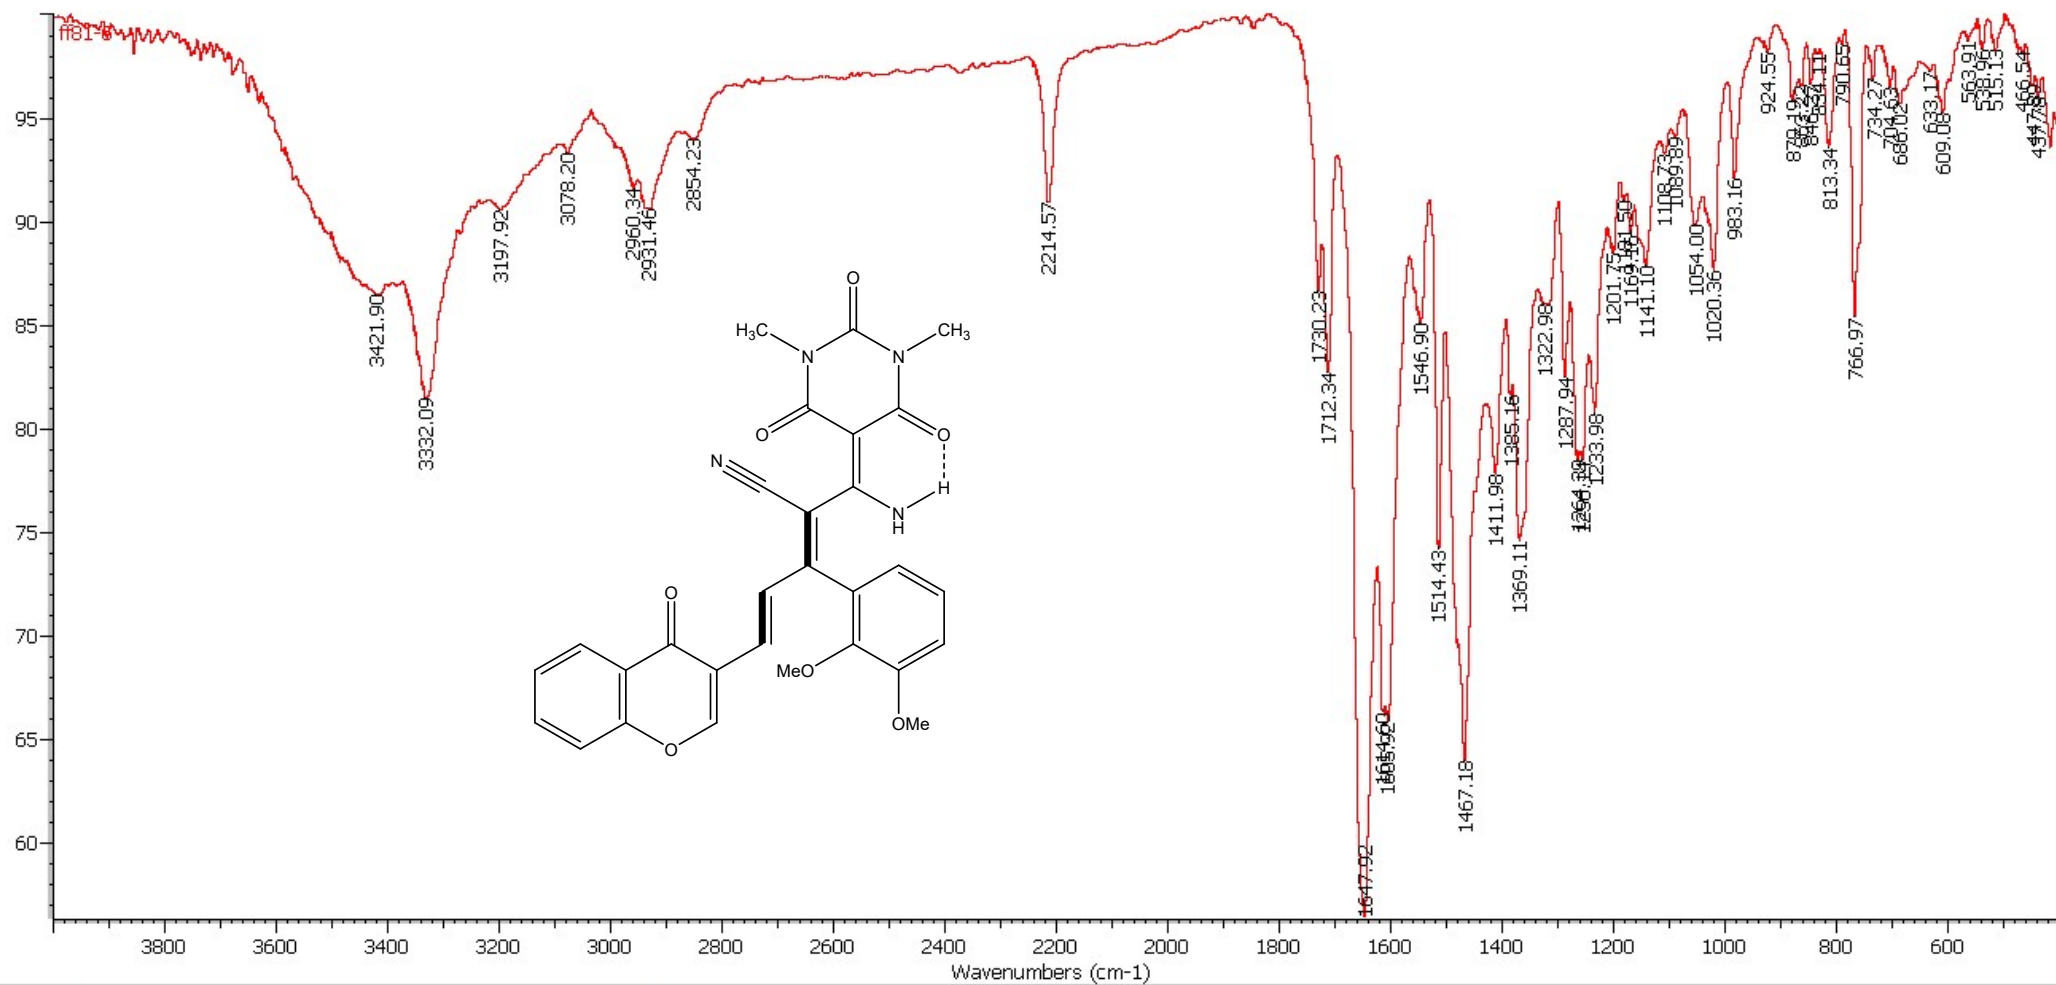

IR of 3c

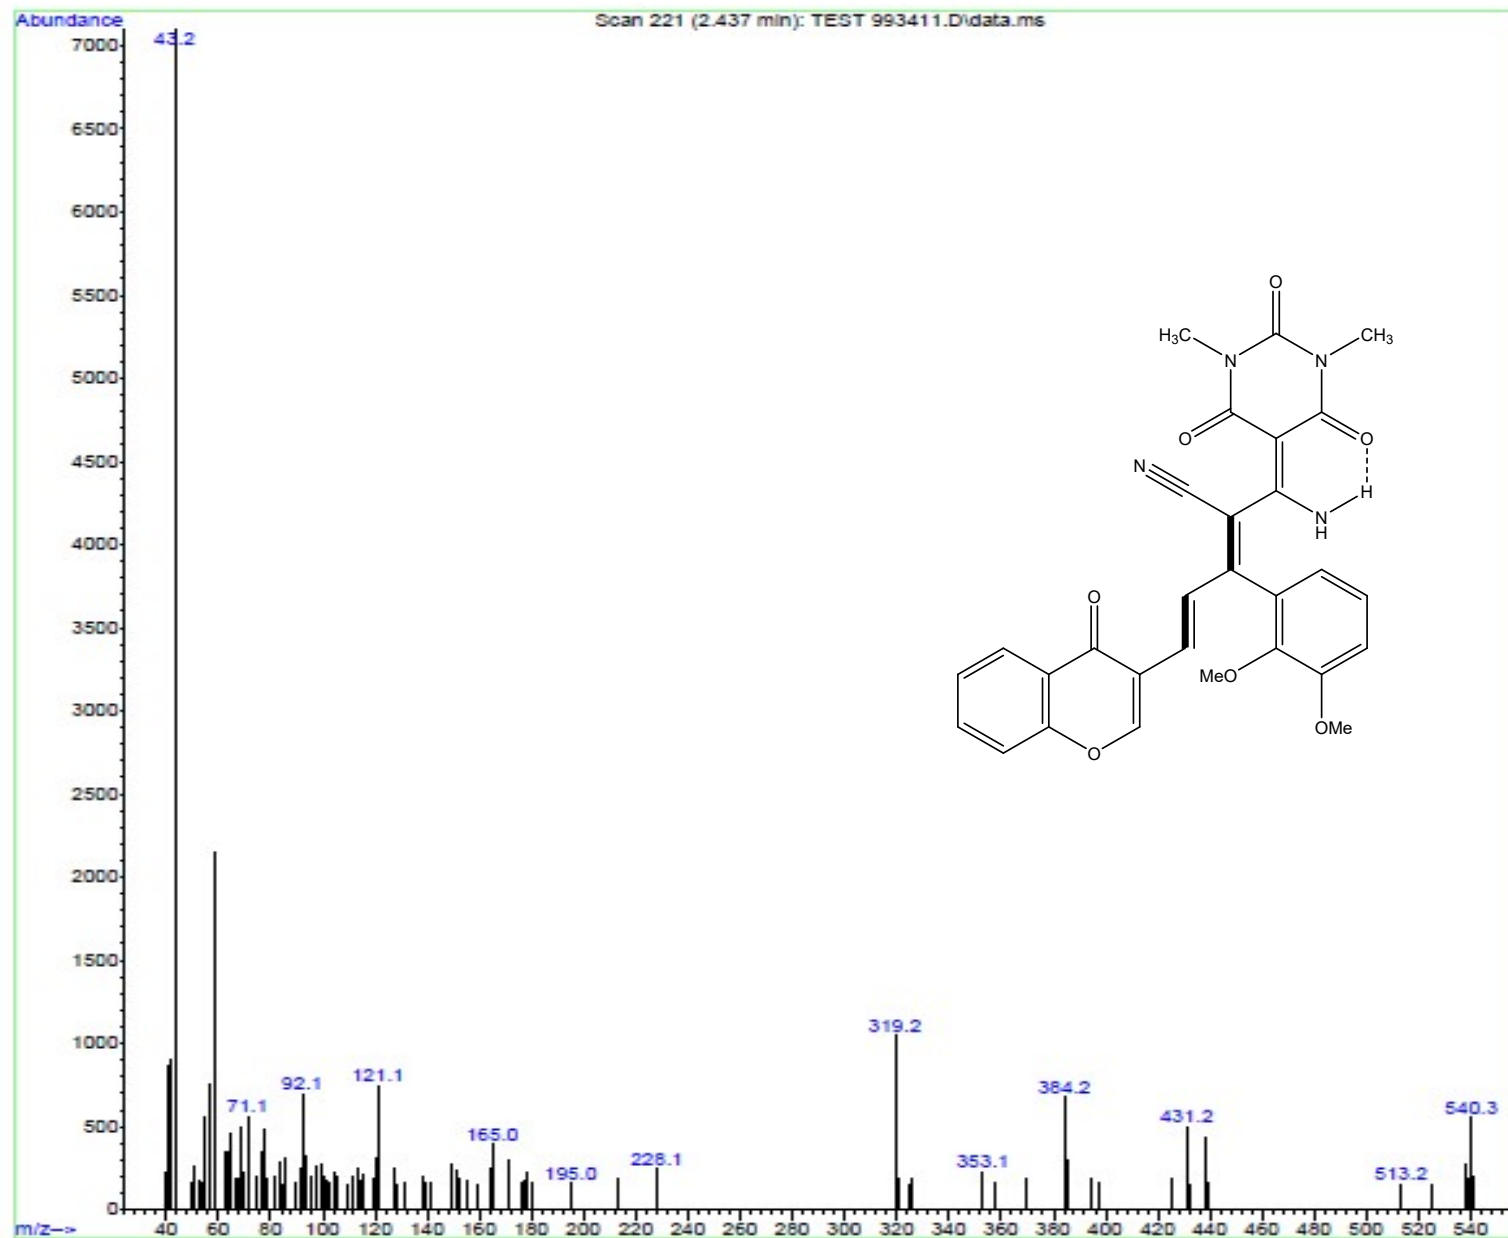

Mass of compound **3c**

S29



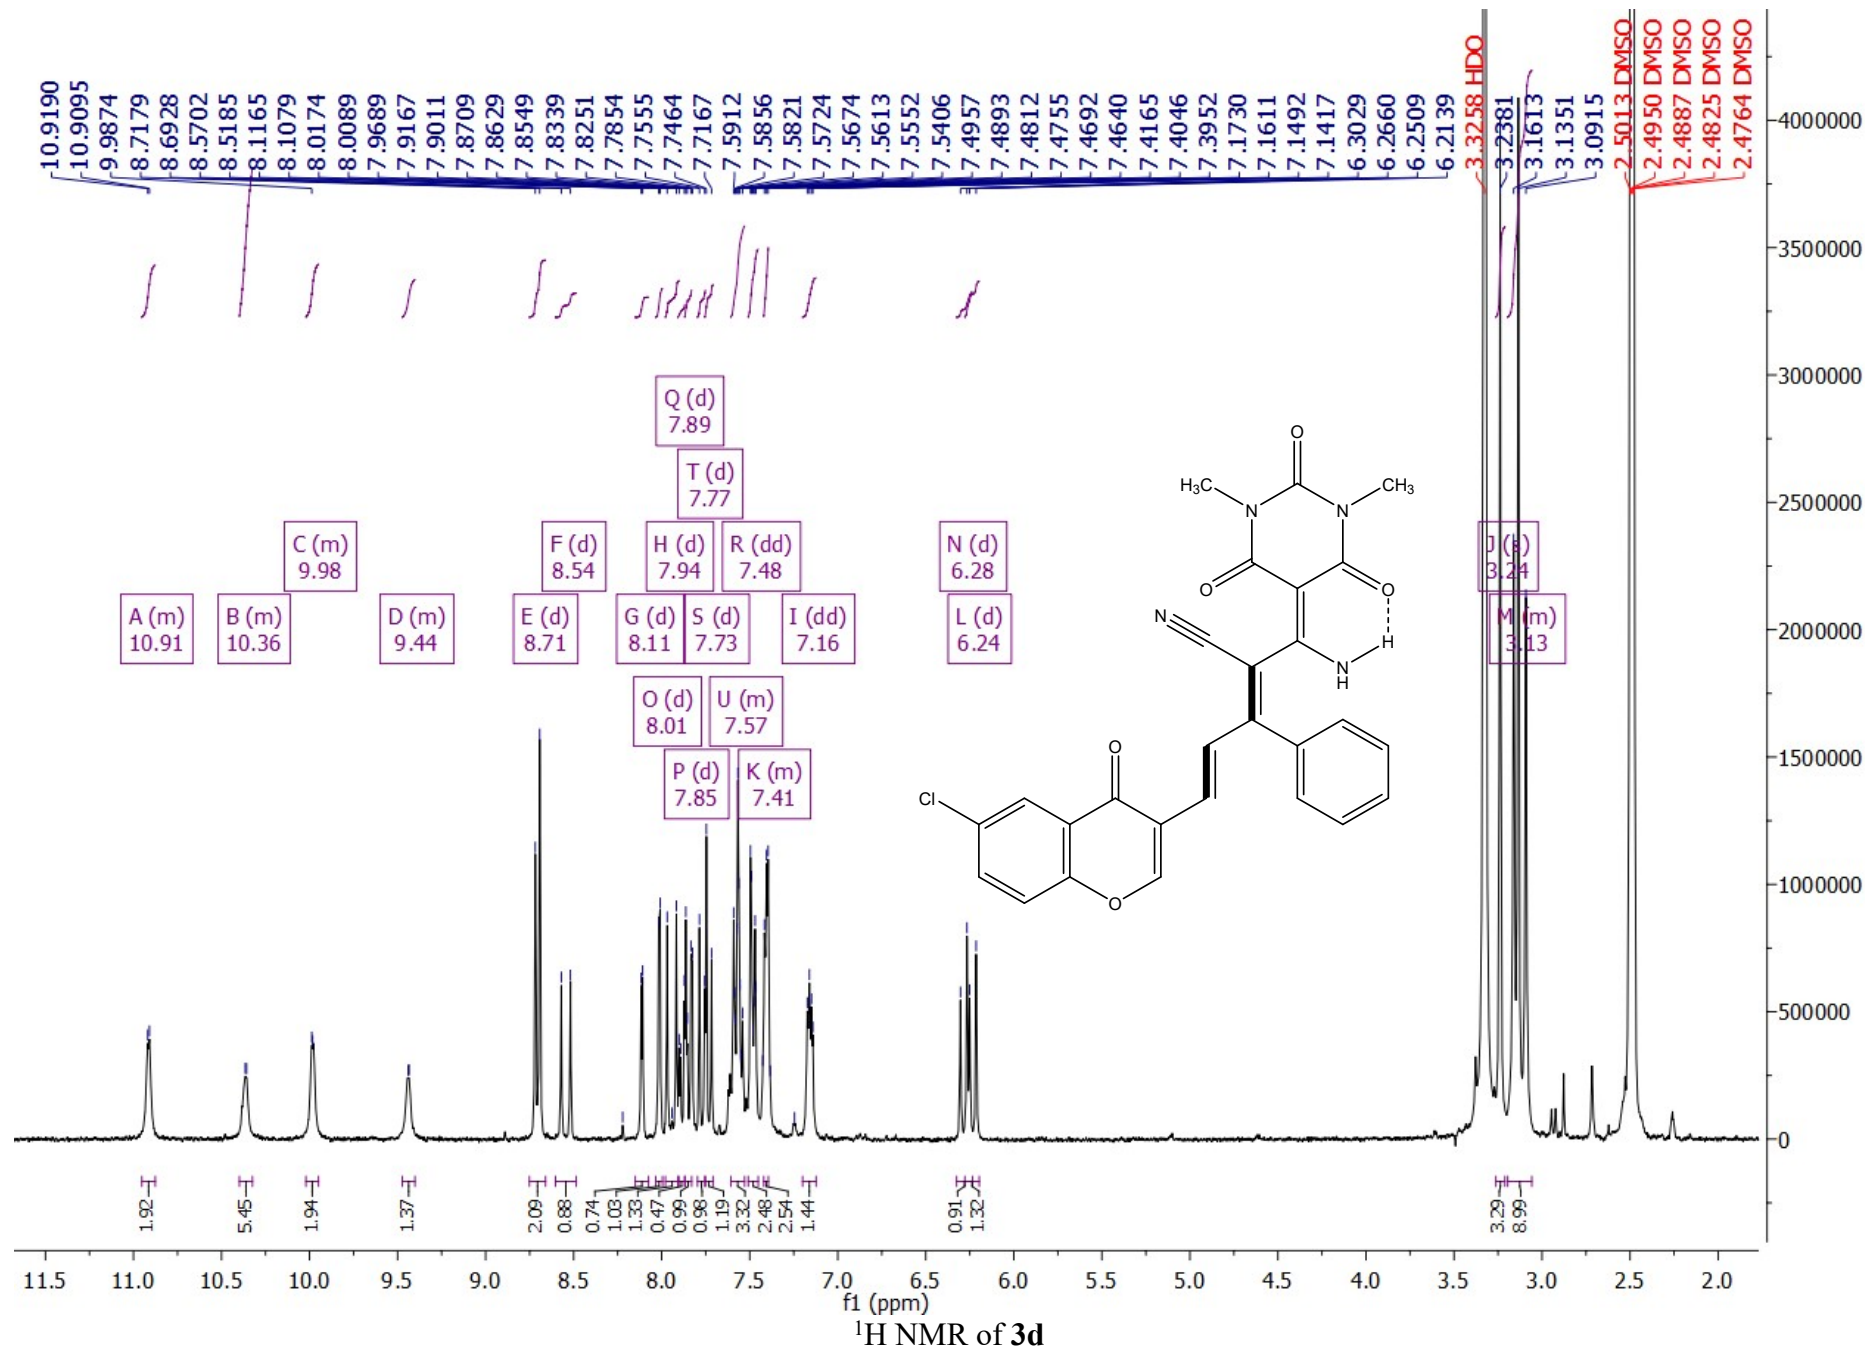

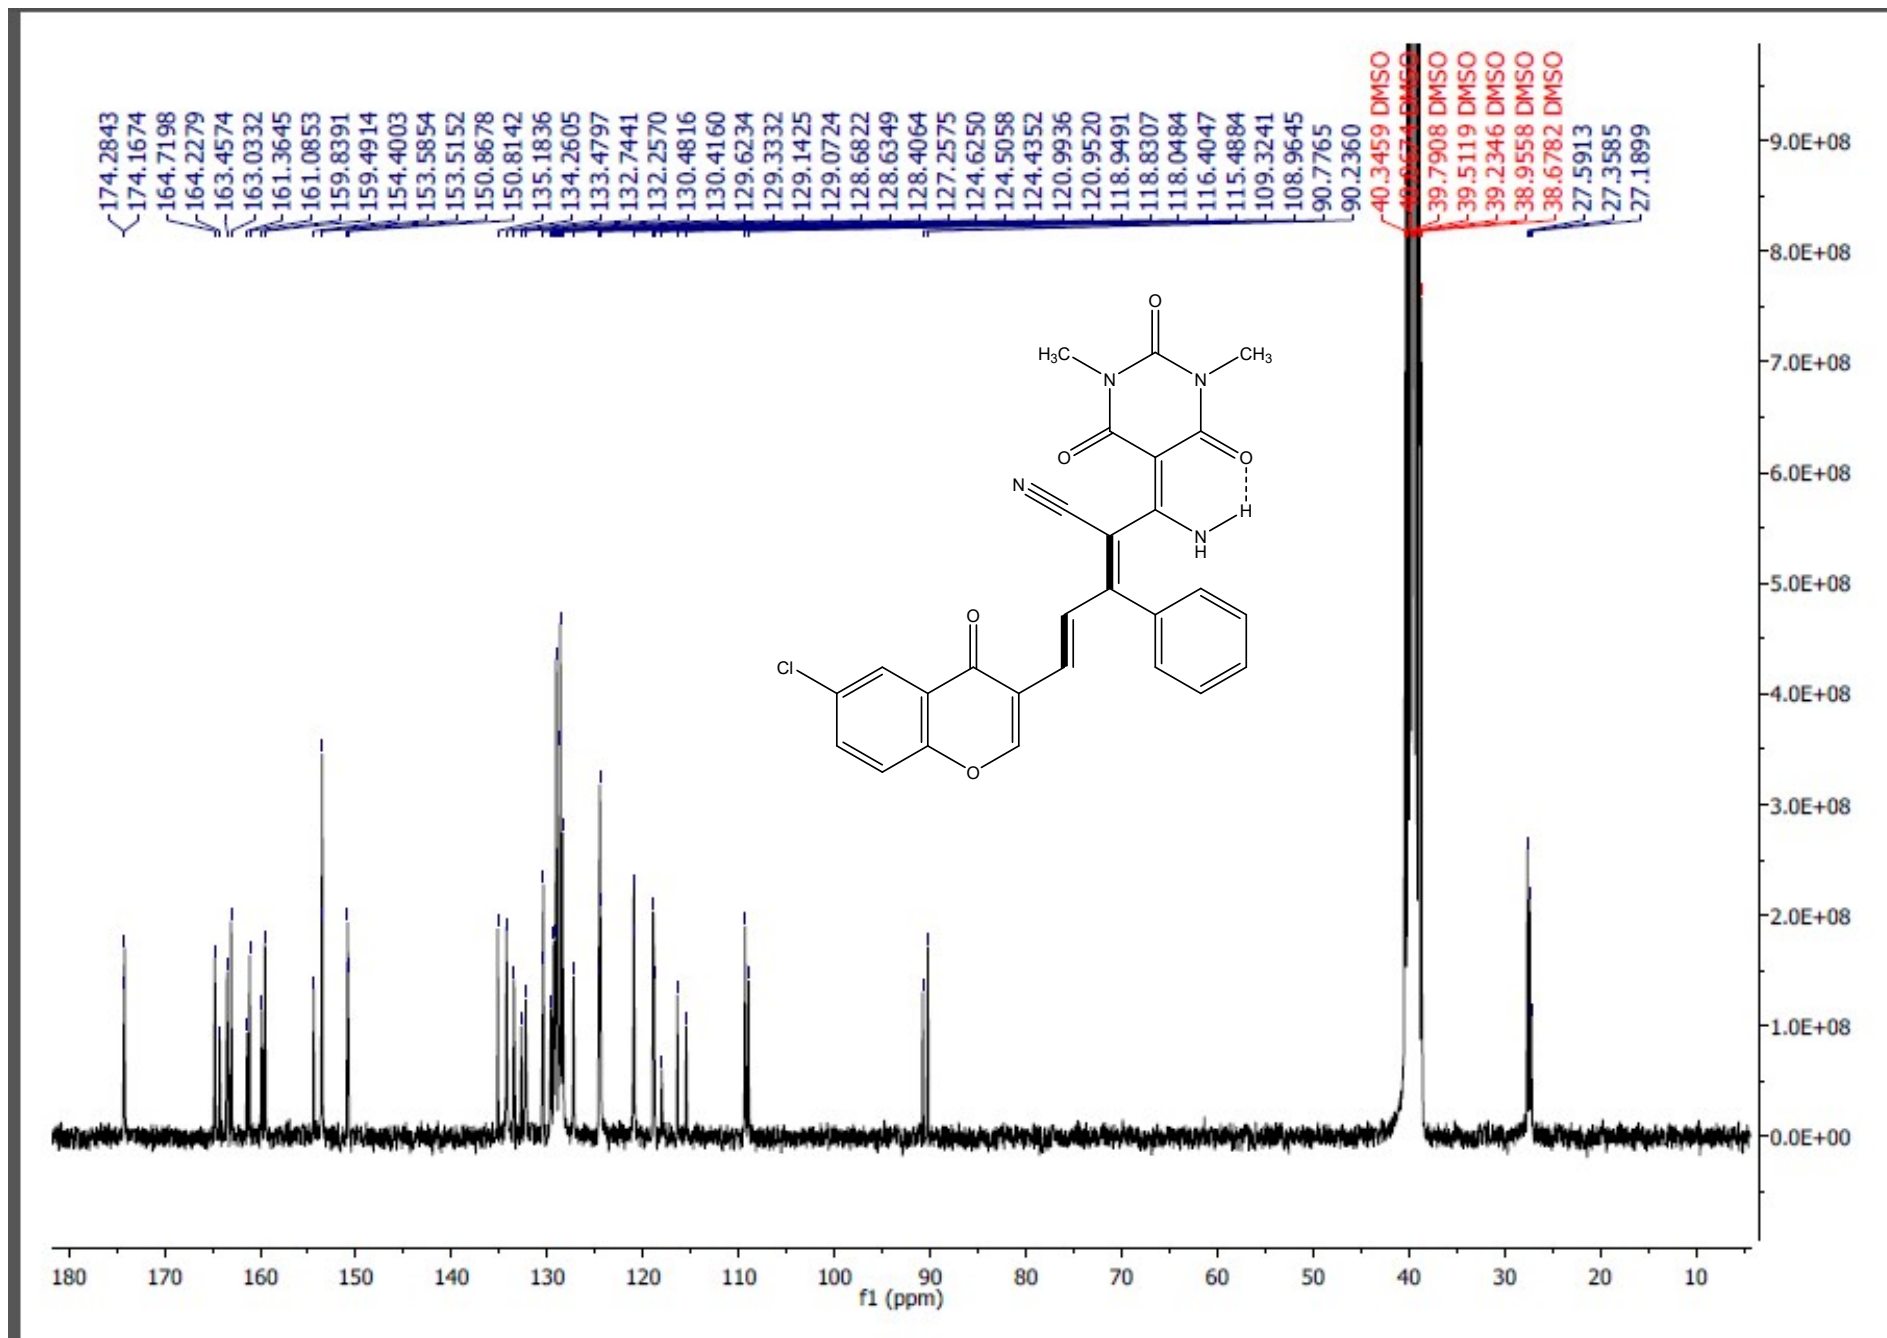

<sup>13</sup>C NMR of 3d

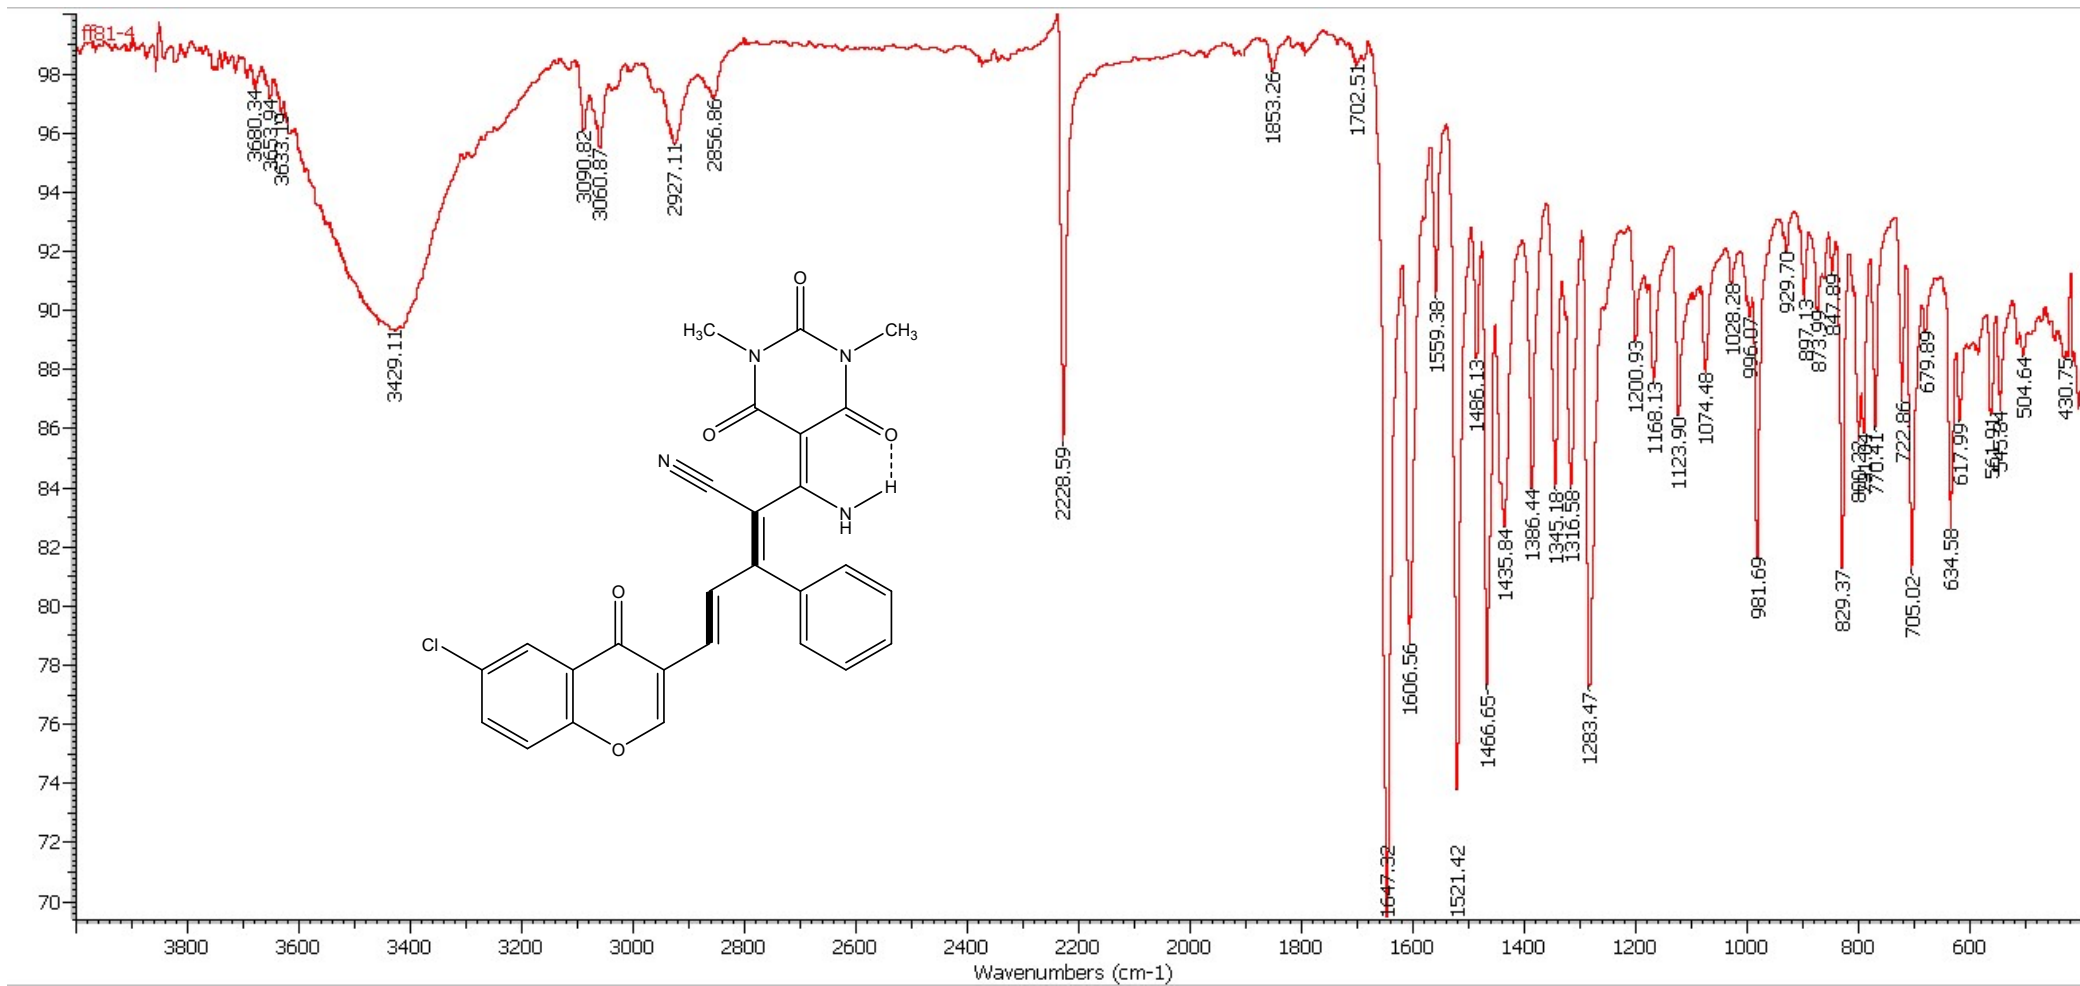

IR of 3d



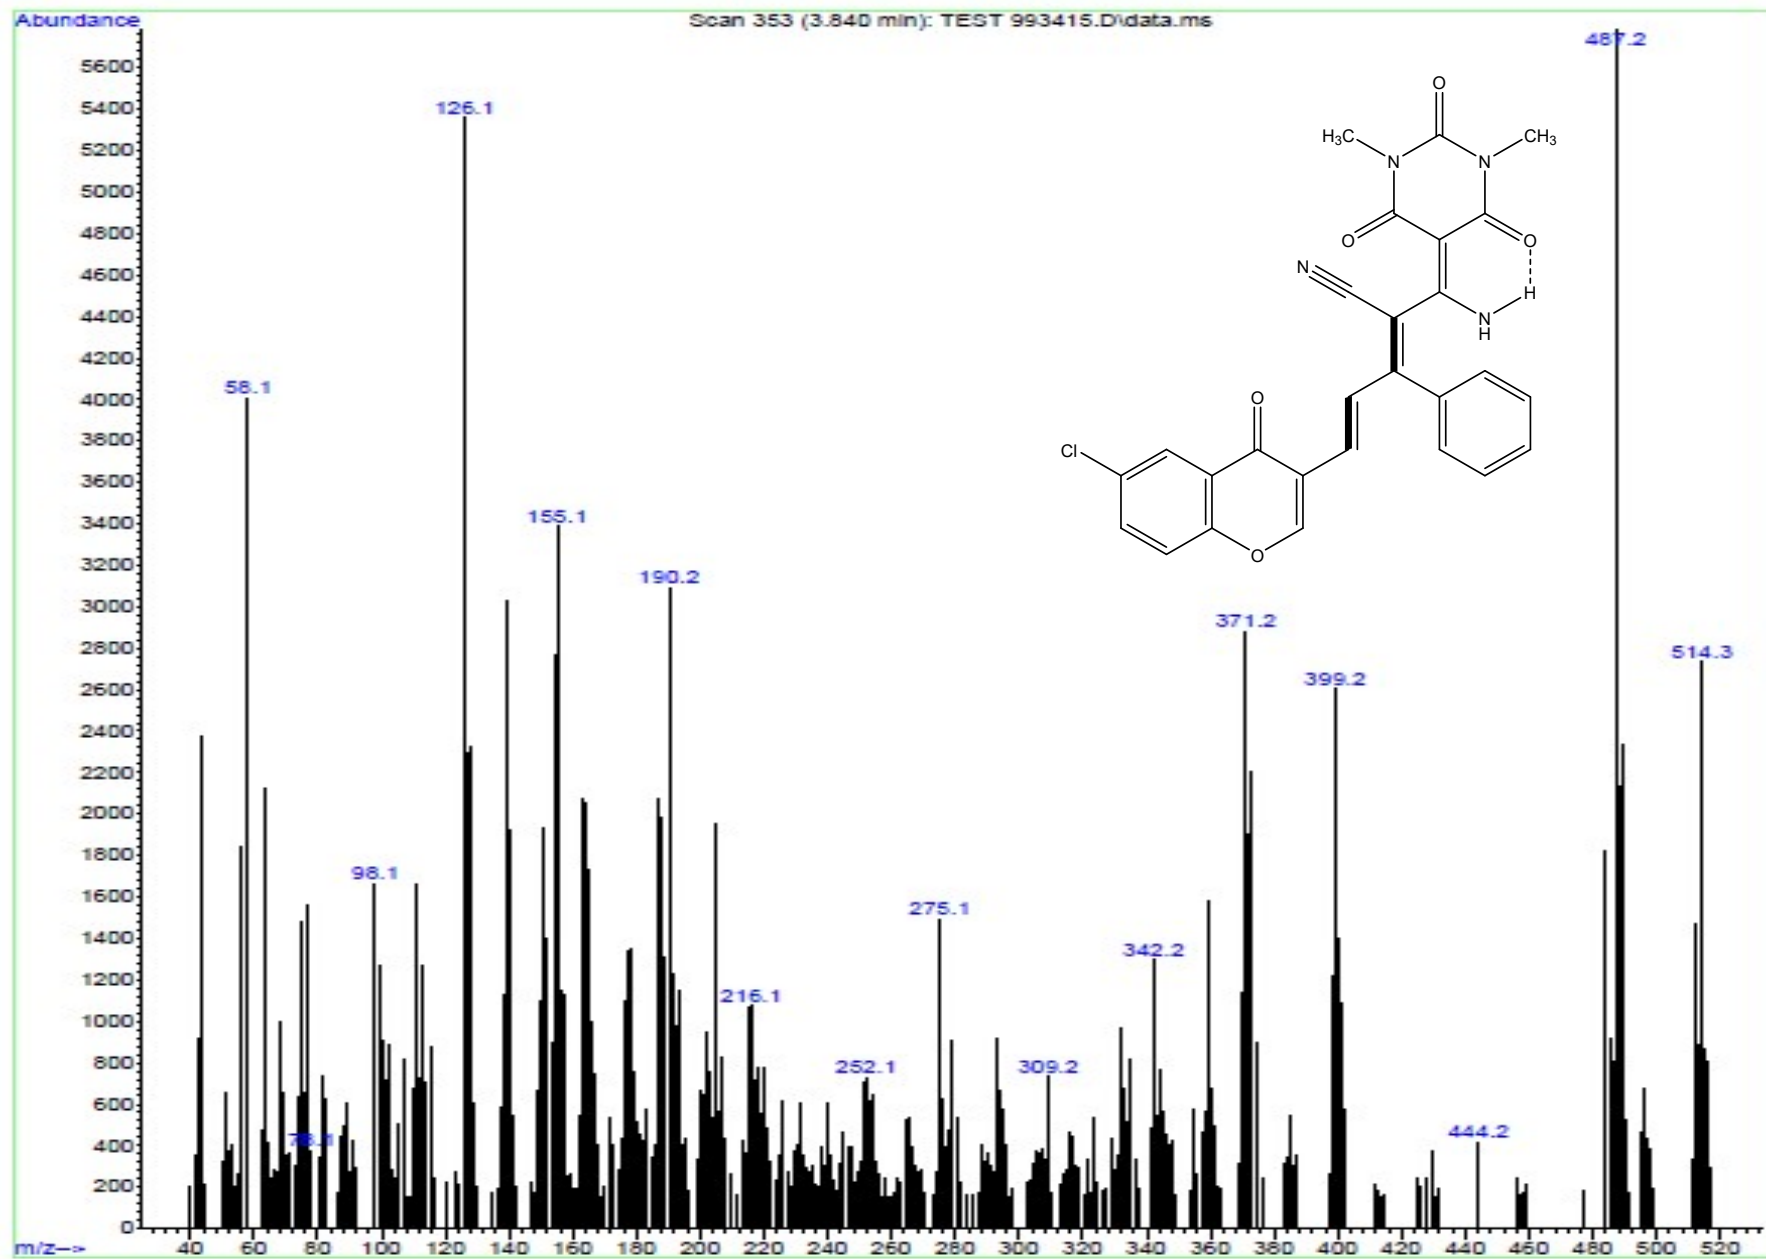

Mass of compound **3d**

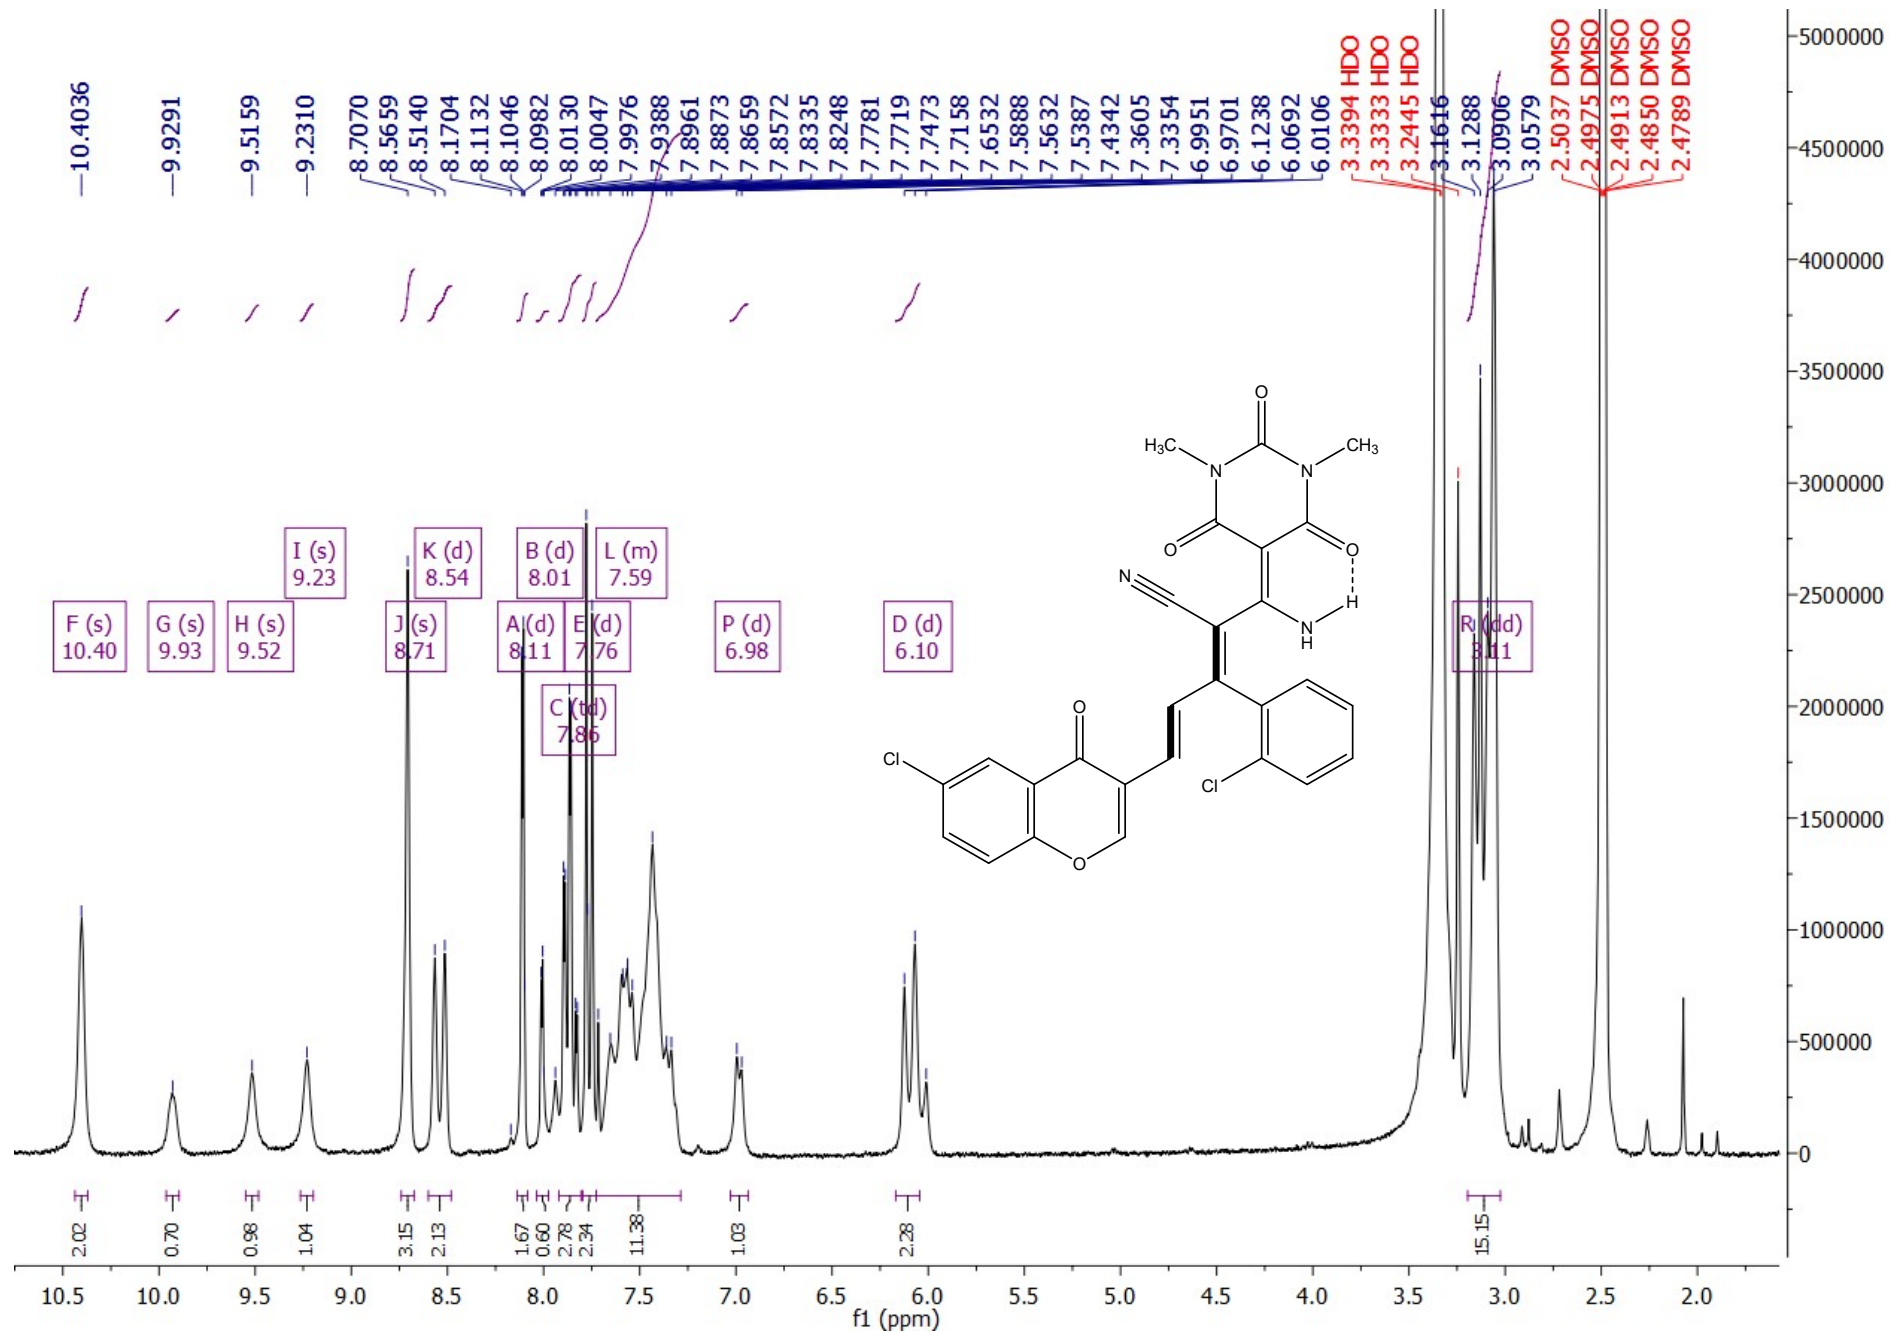

<sup>1</sup>H NMR of **3e**

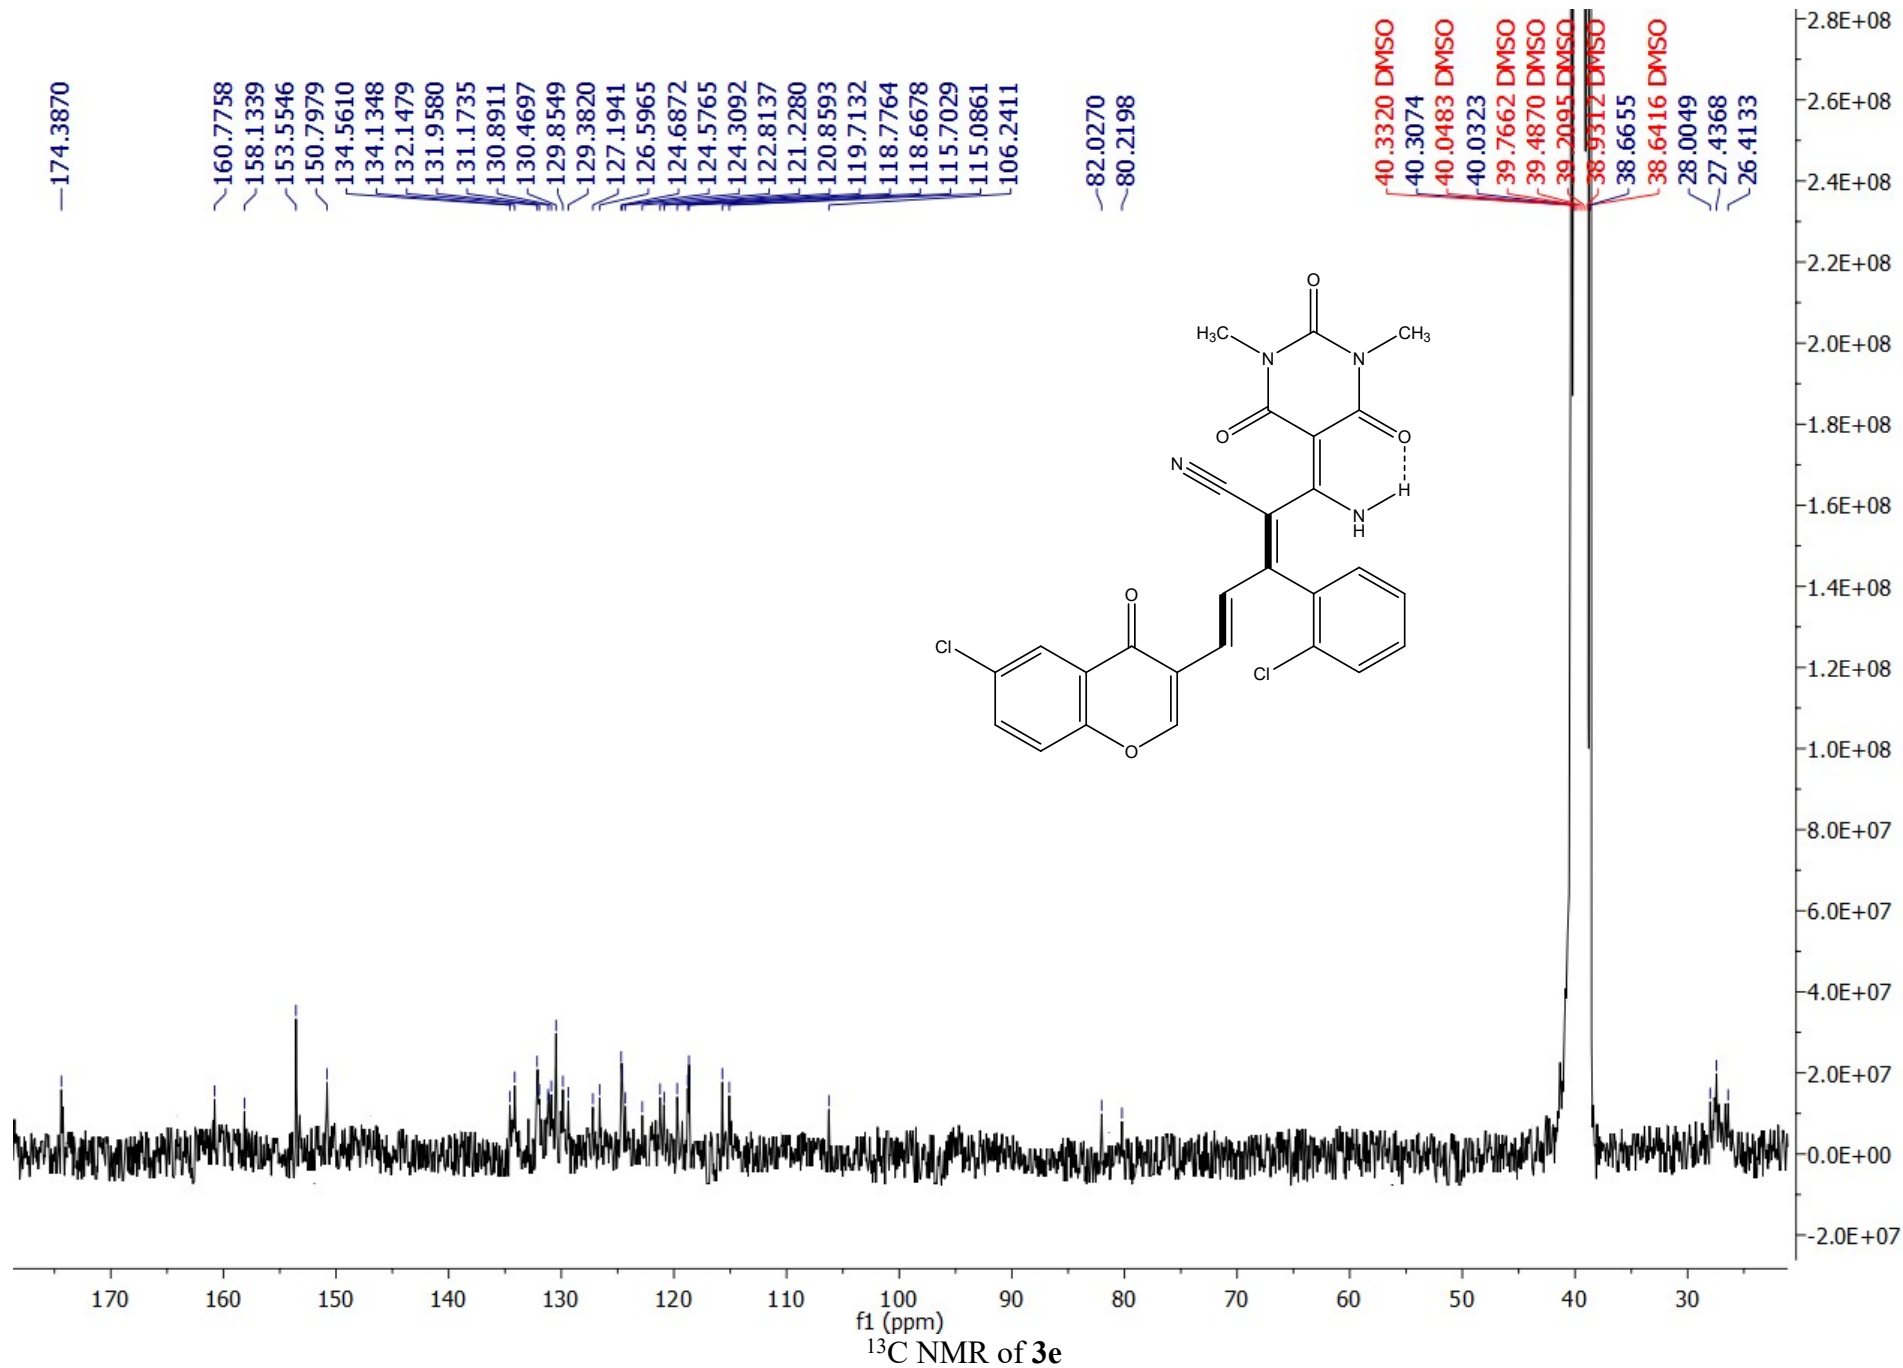

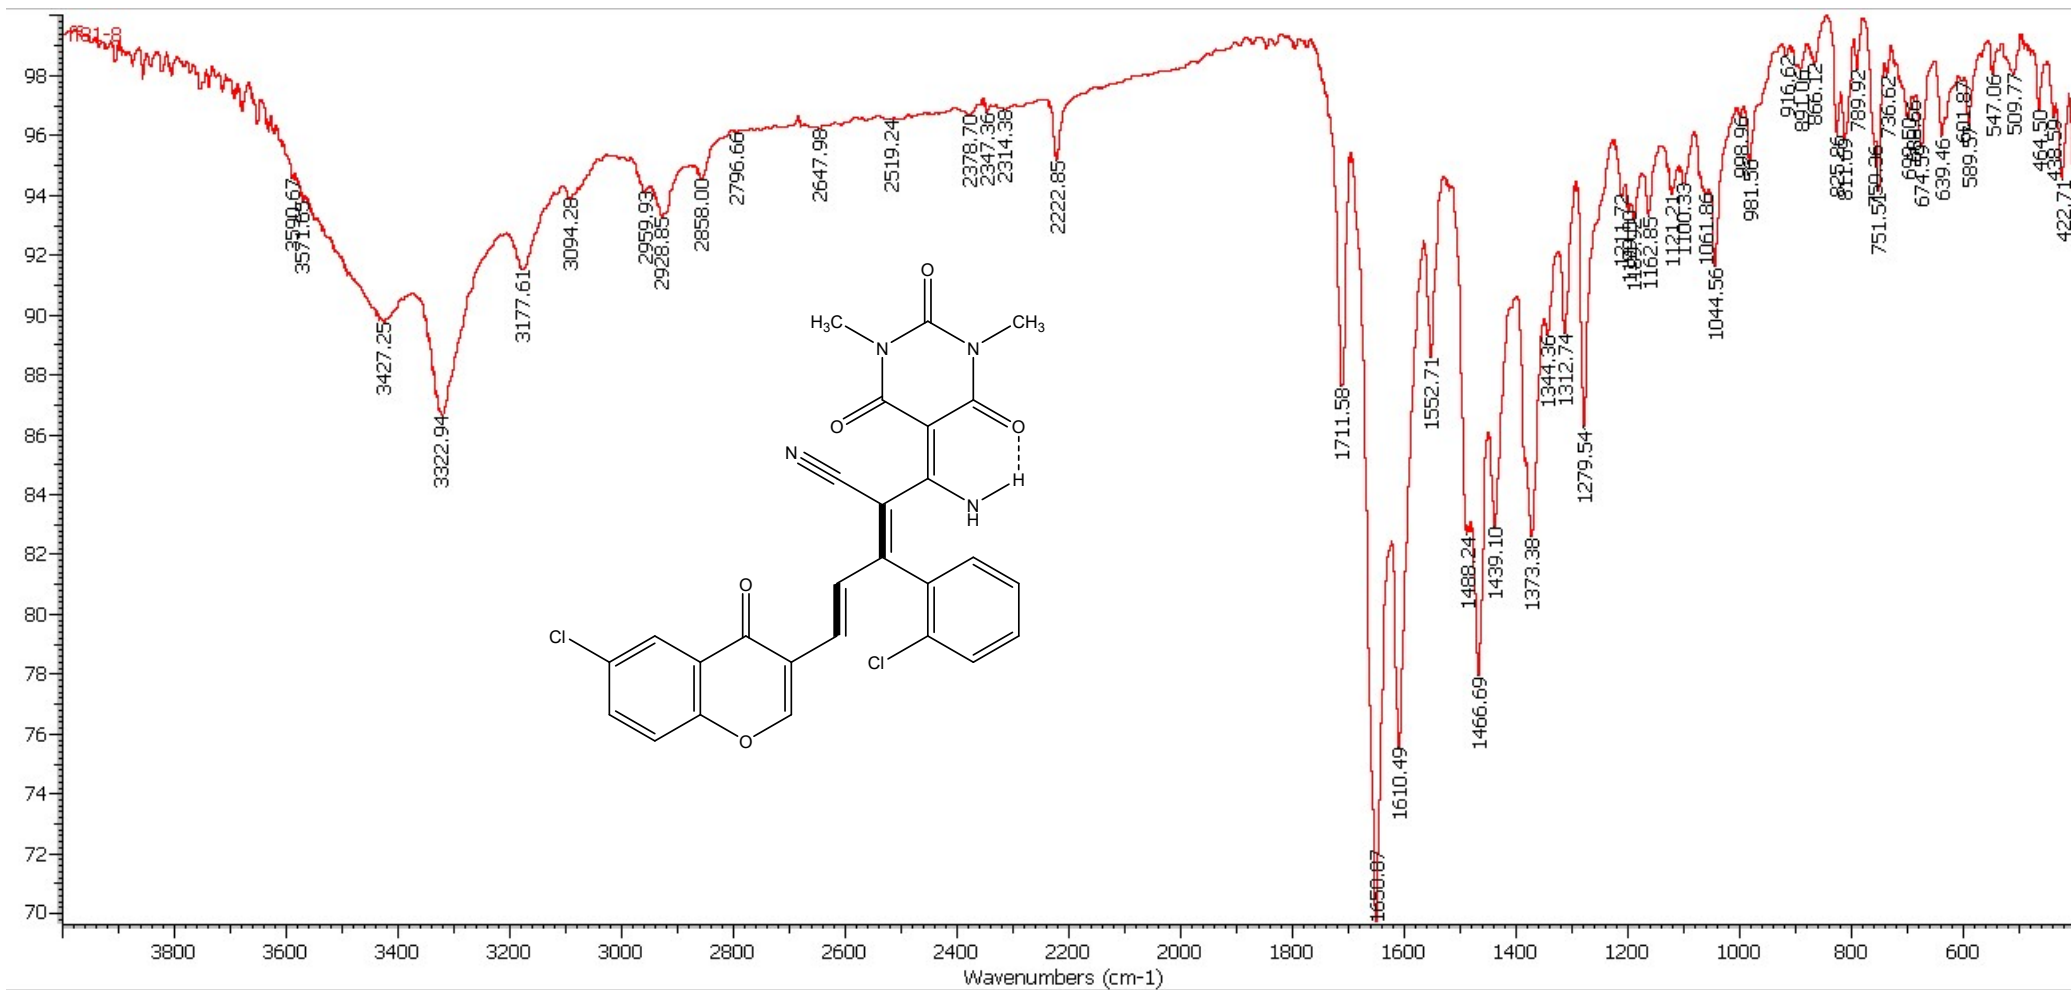

IR of **3e**

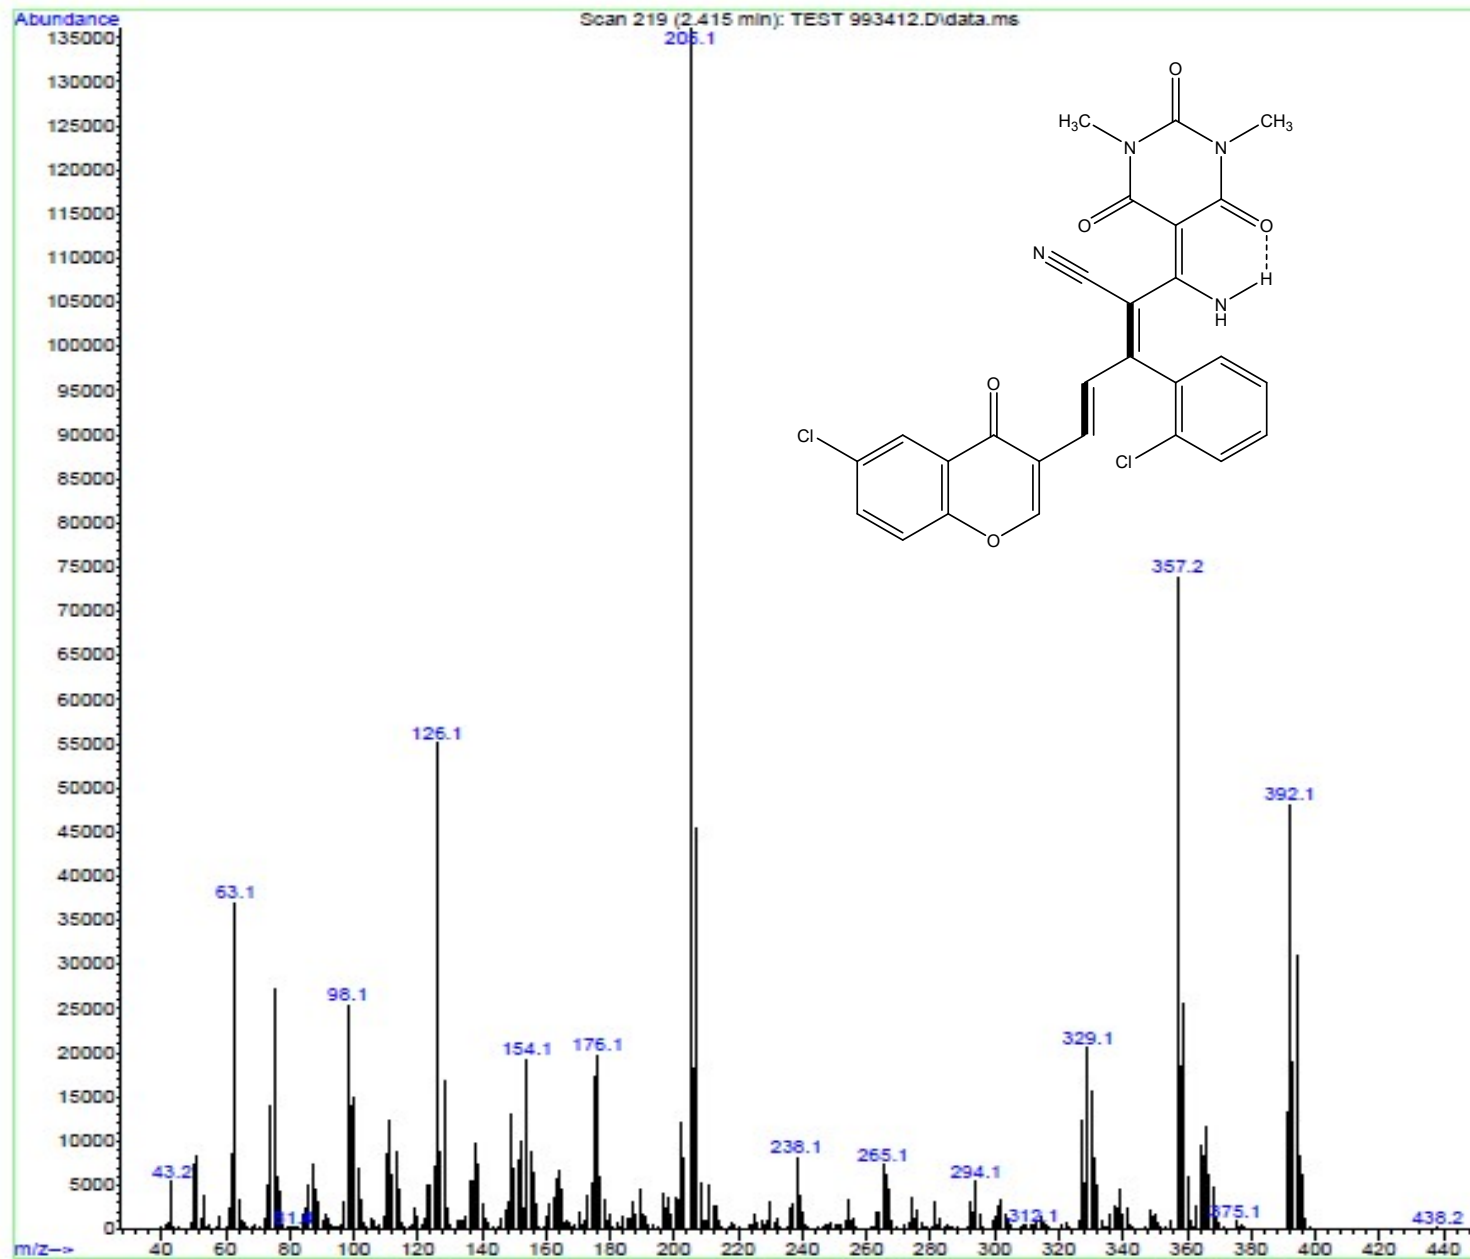

Mass of compound **3e**

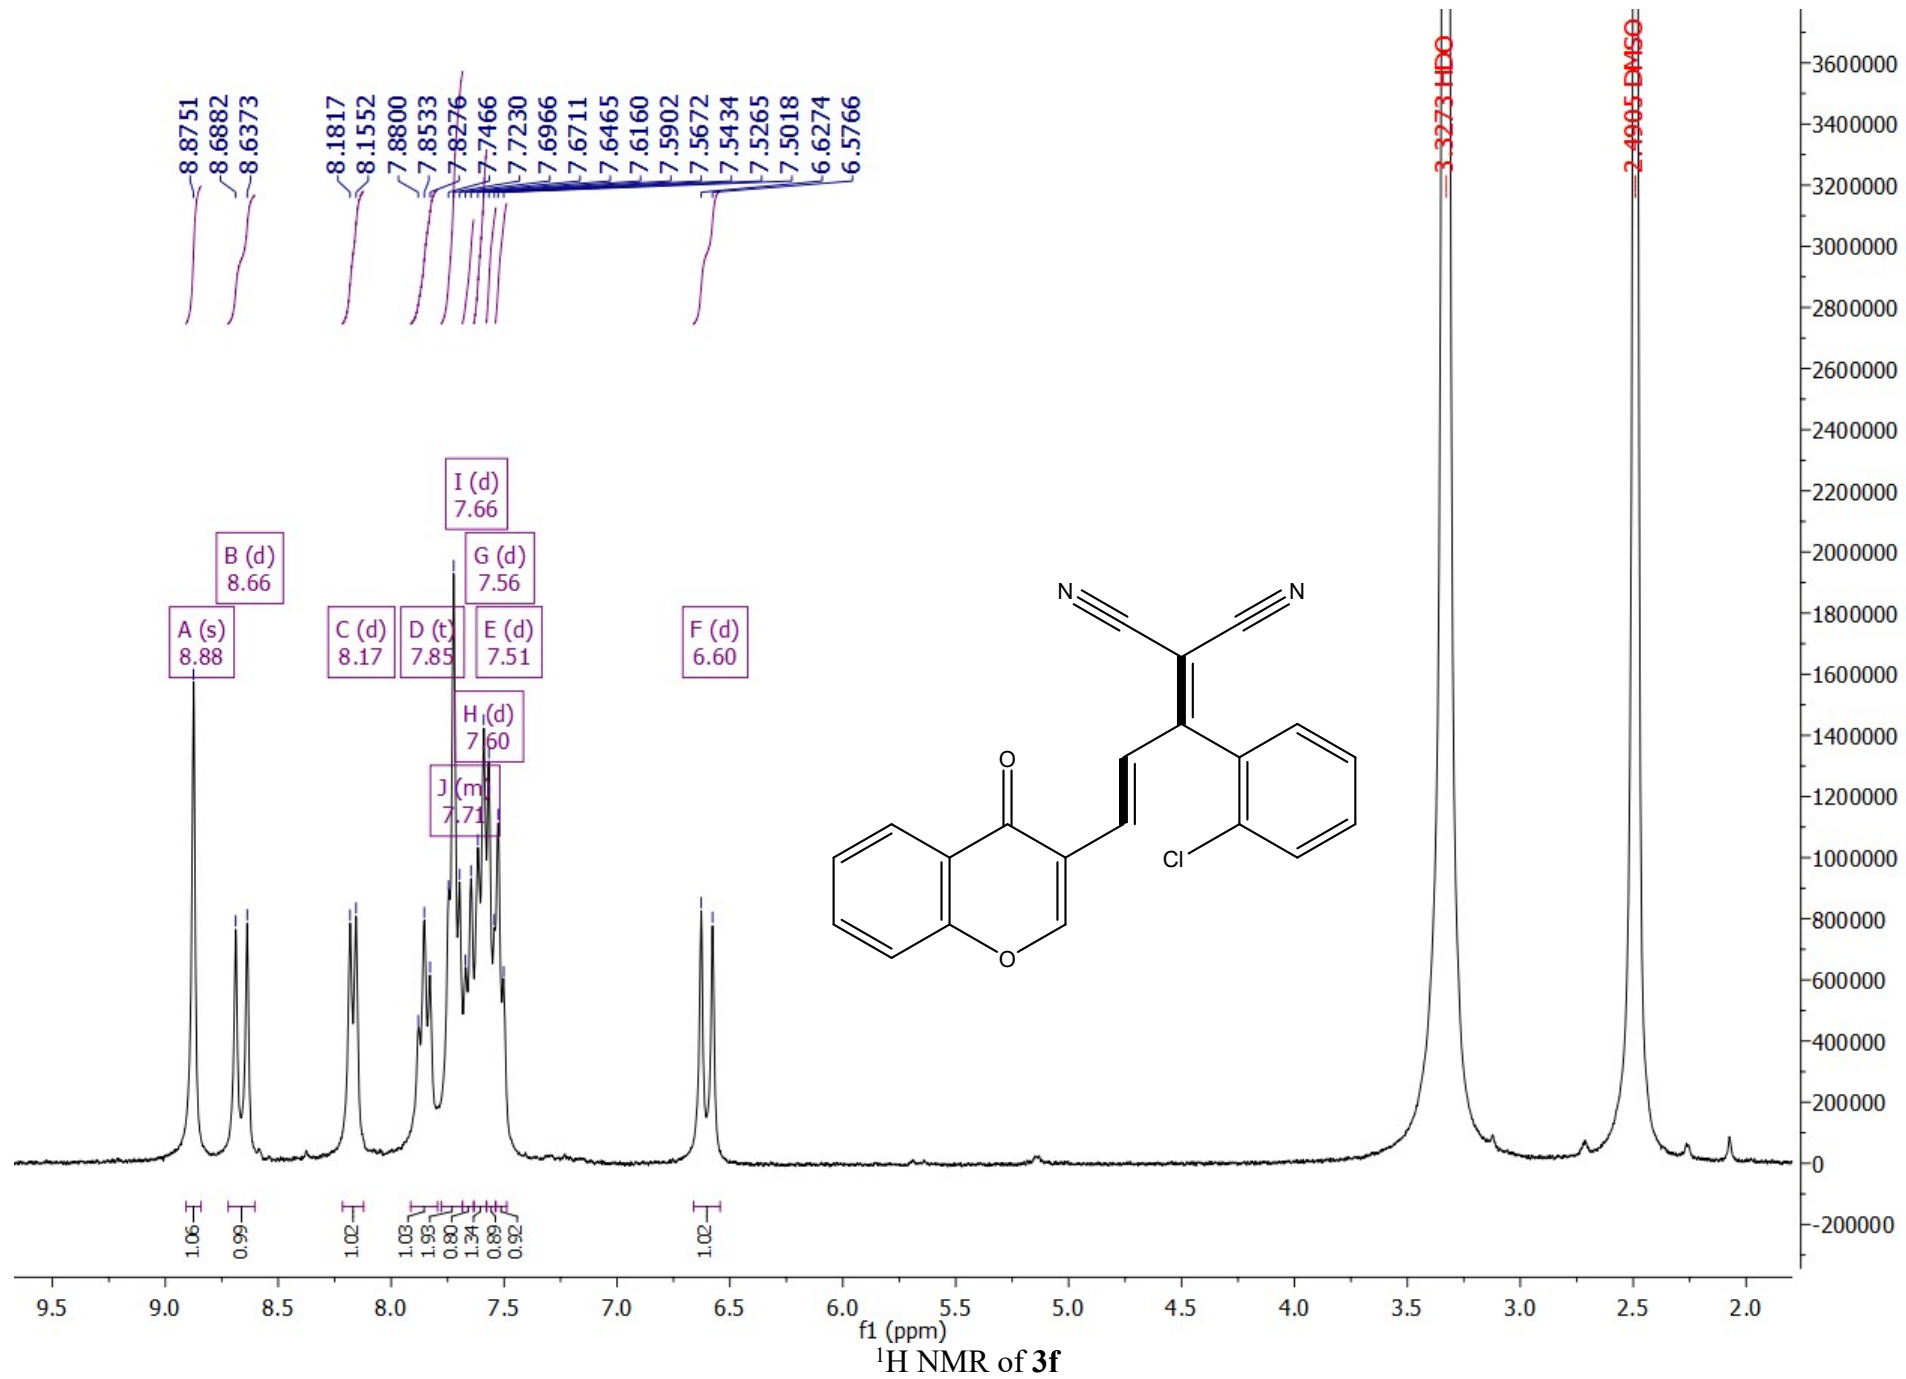



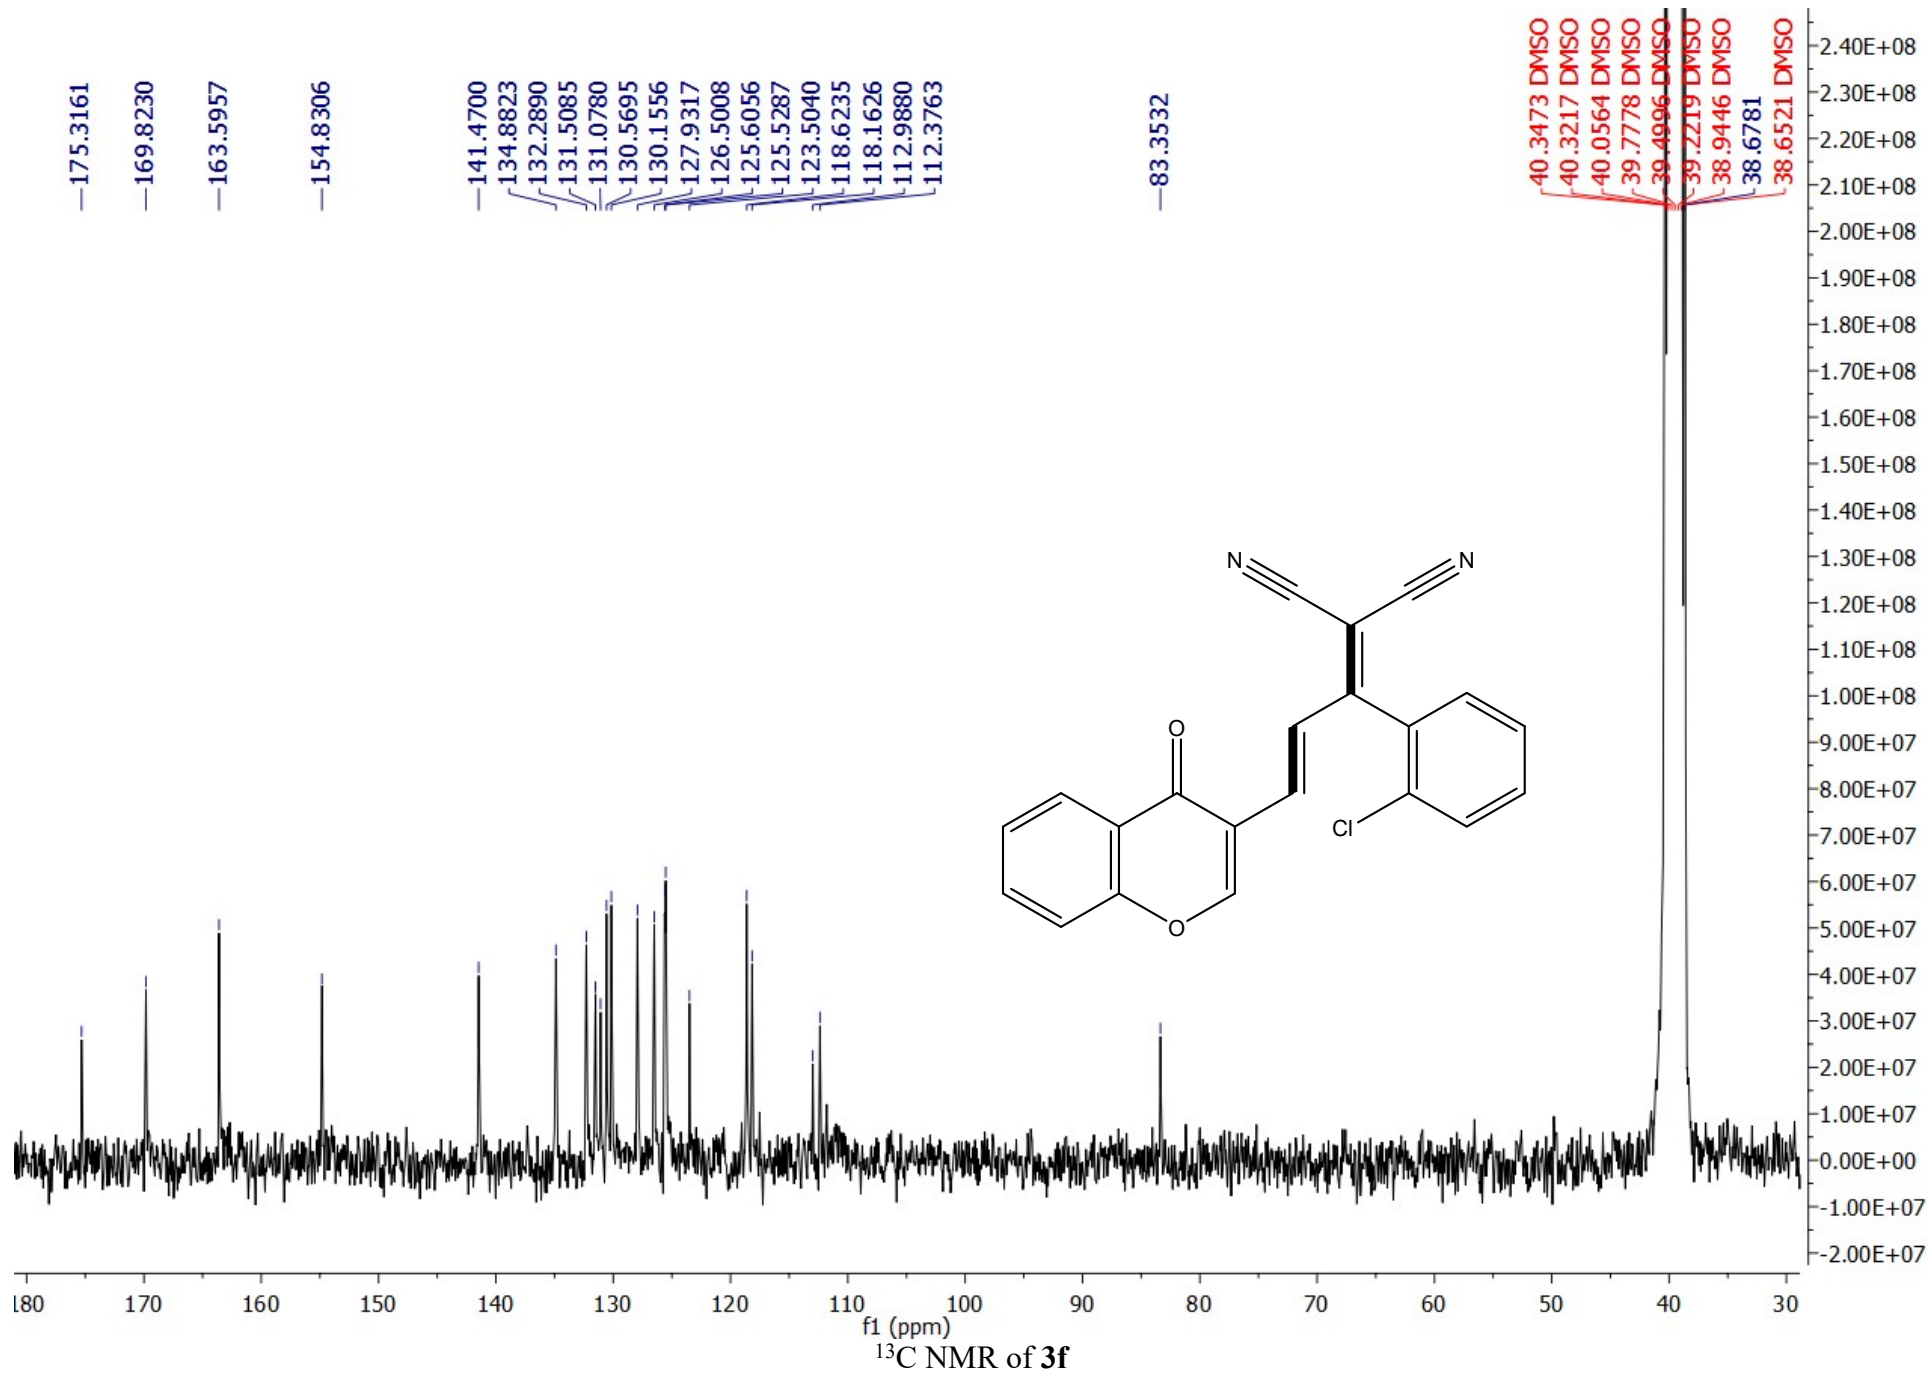

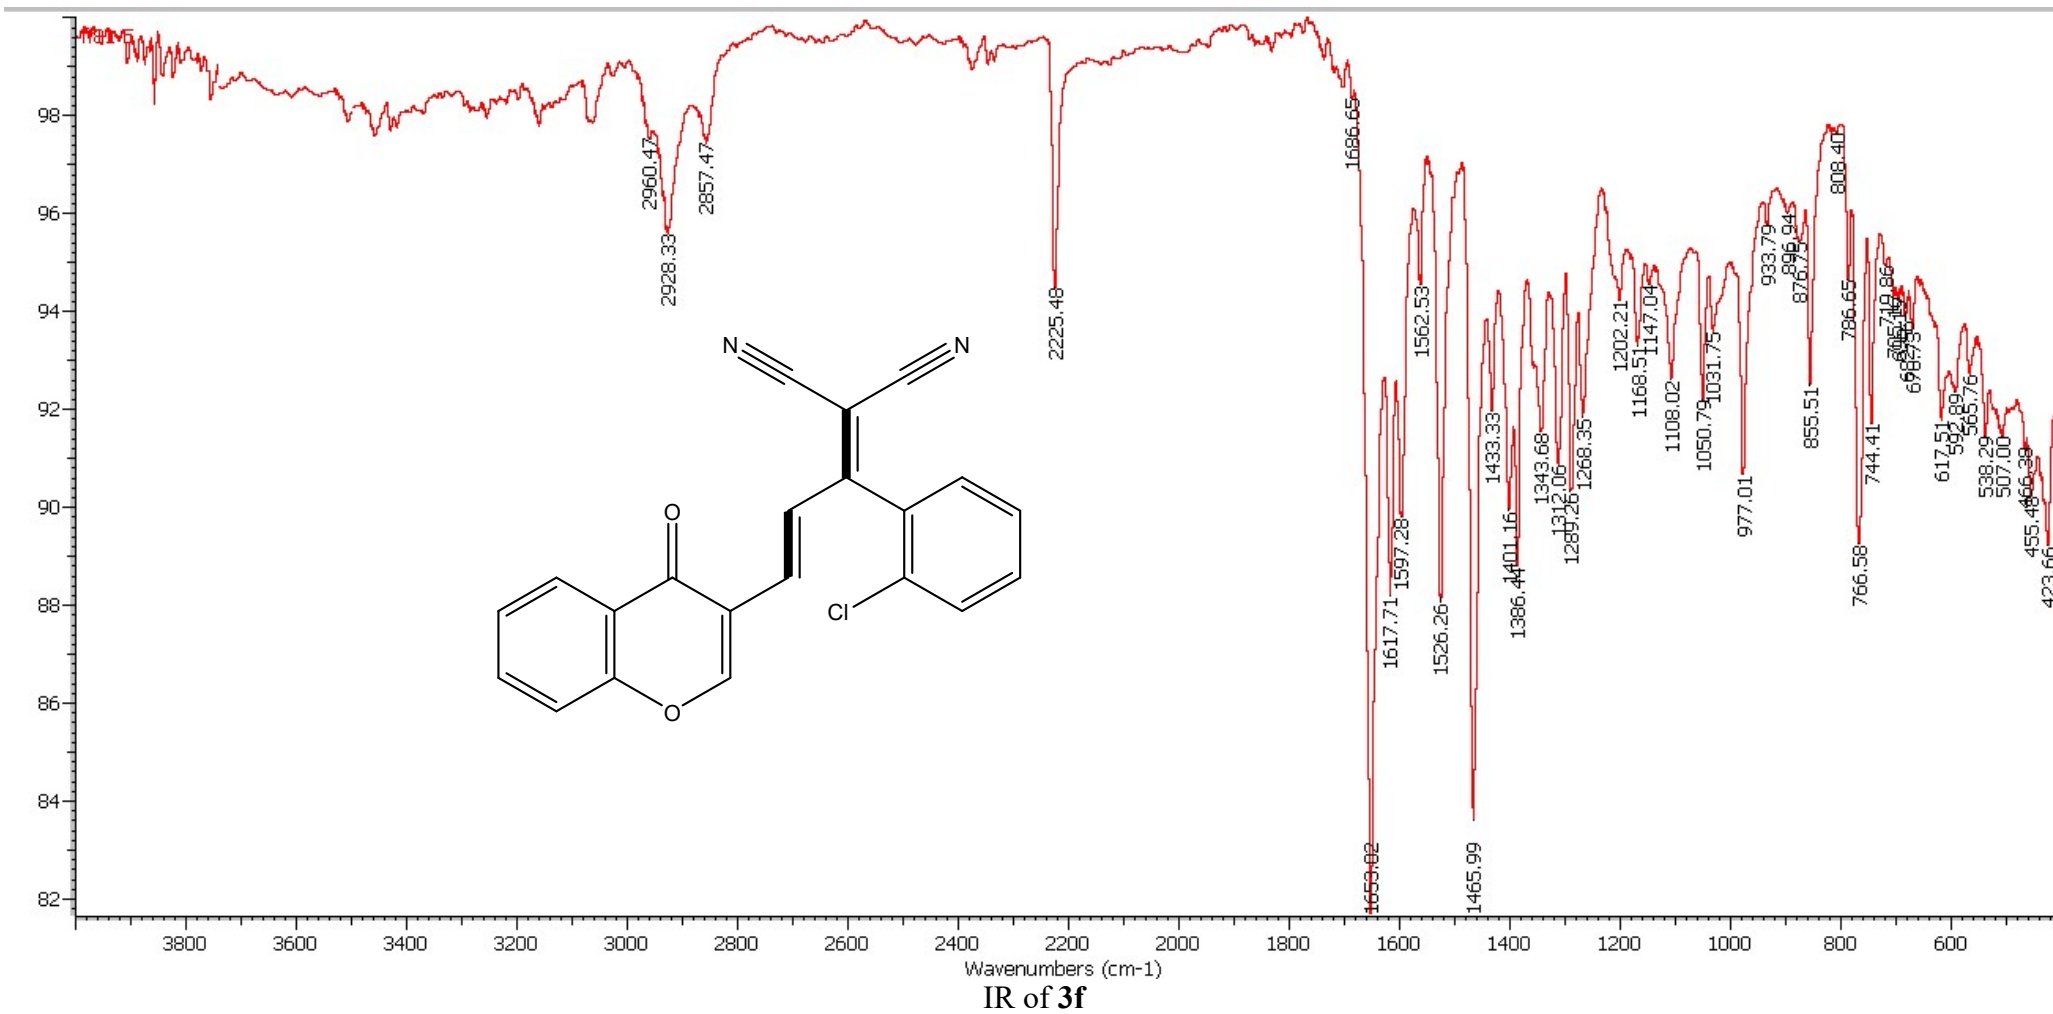



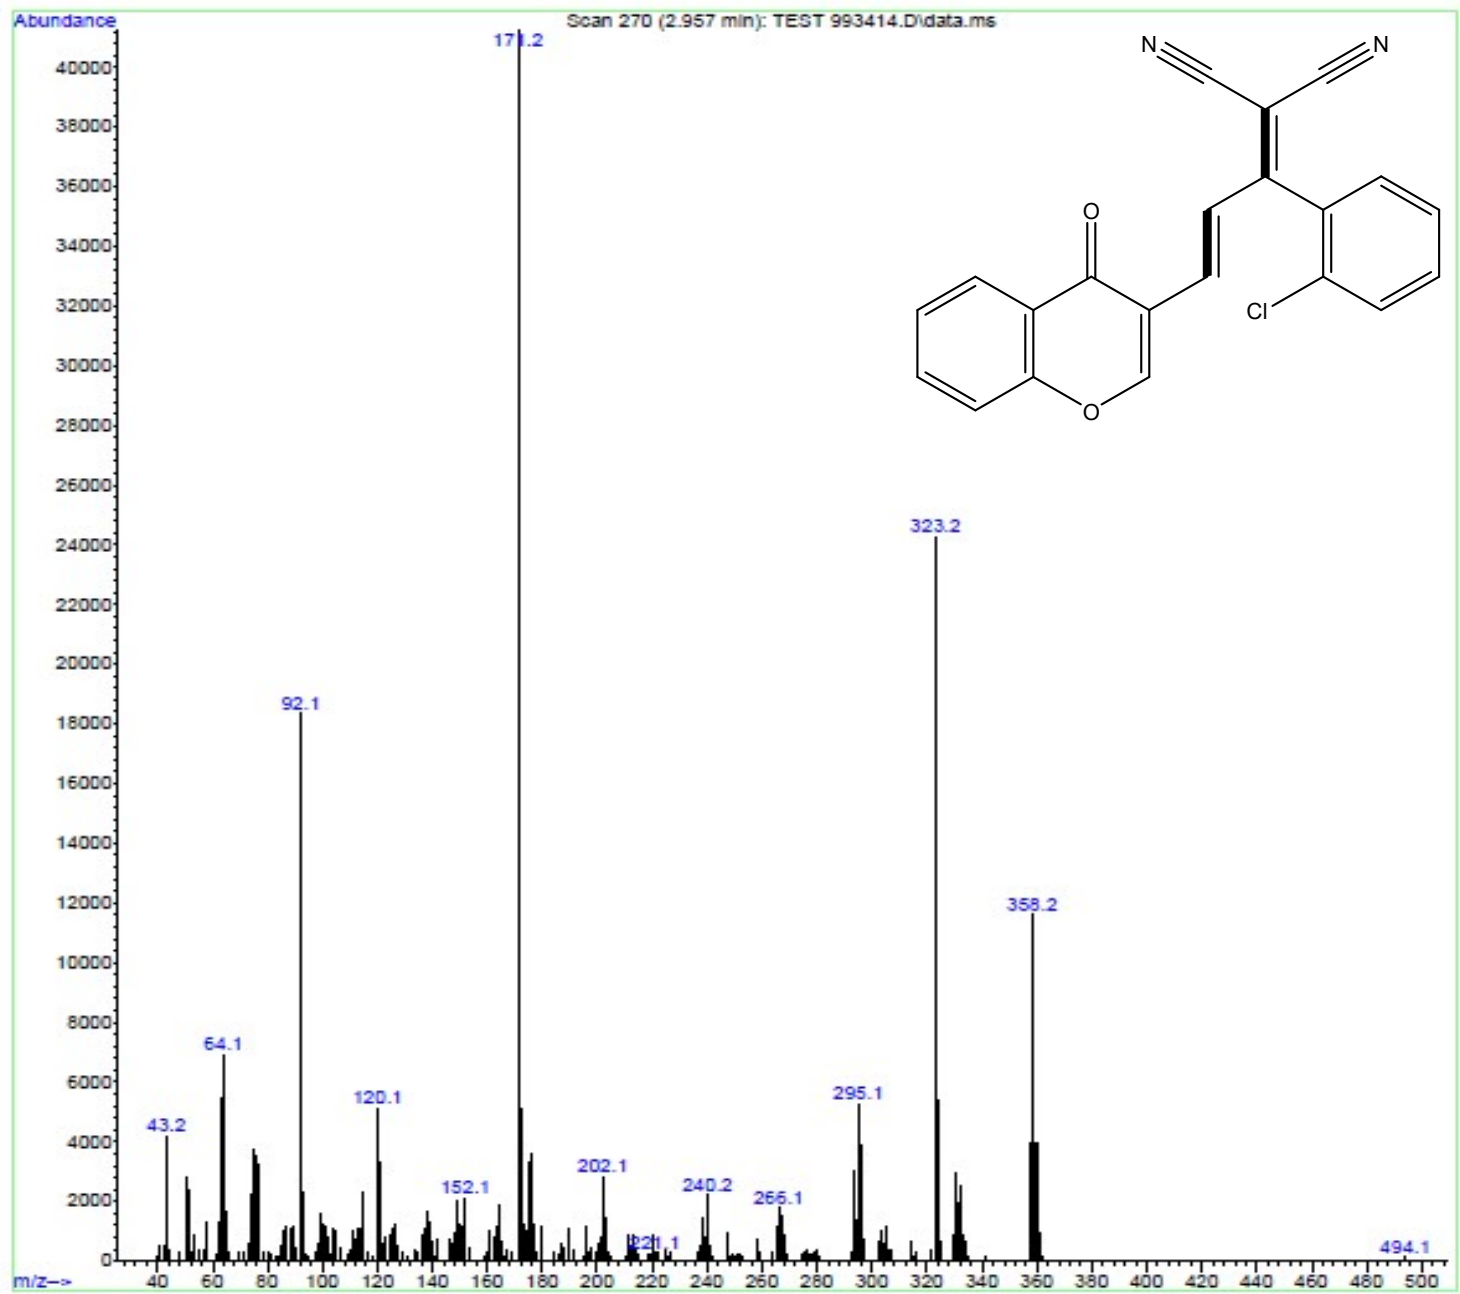

Mass of compound 3f

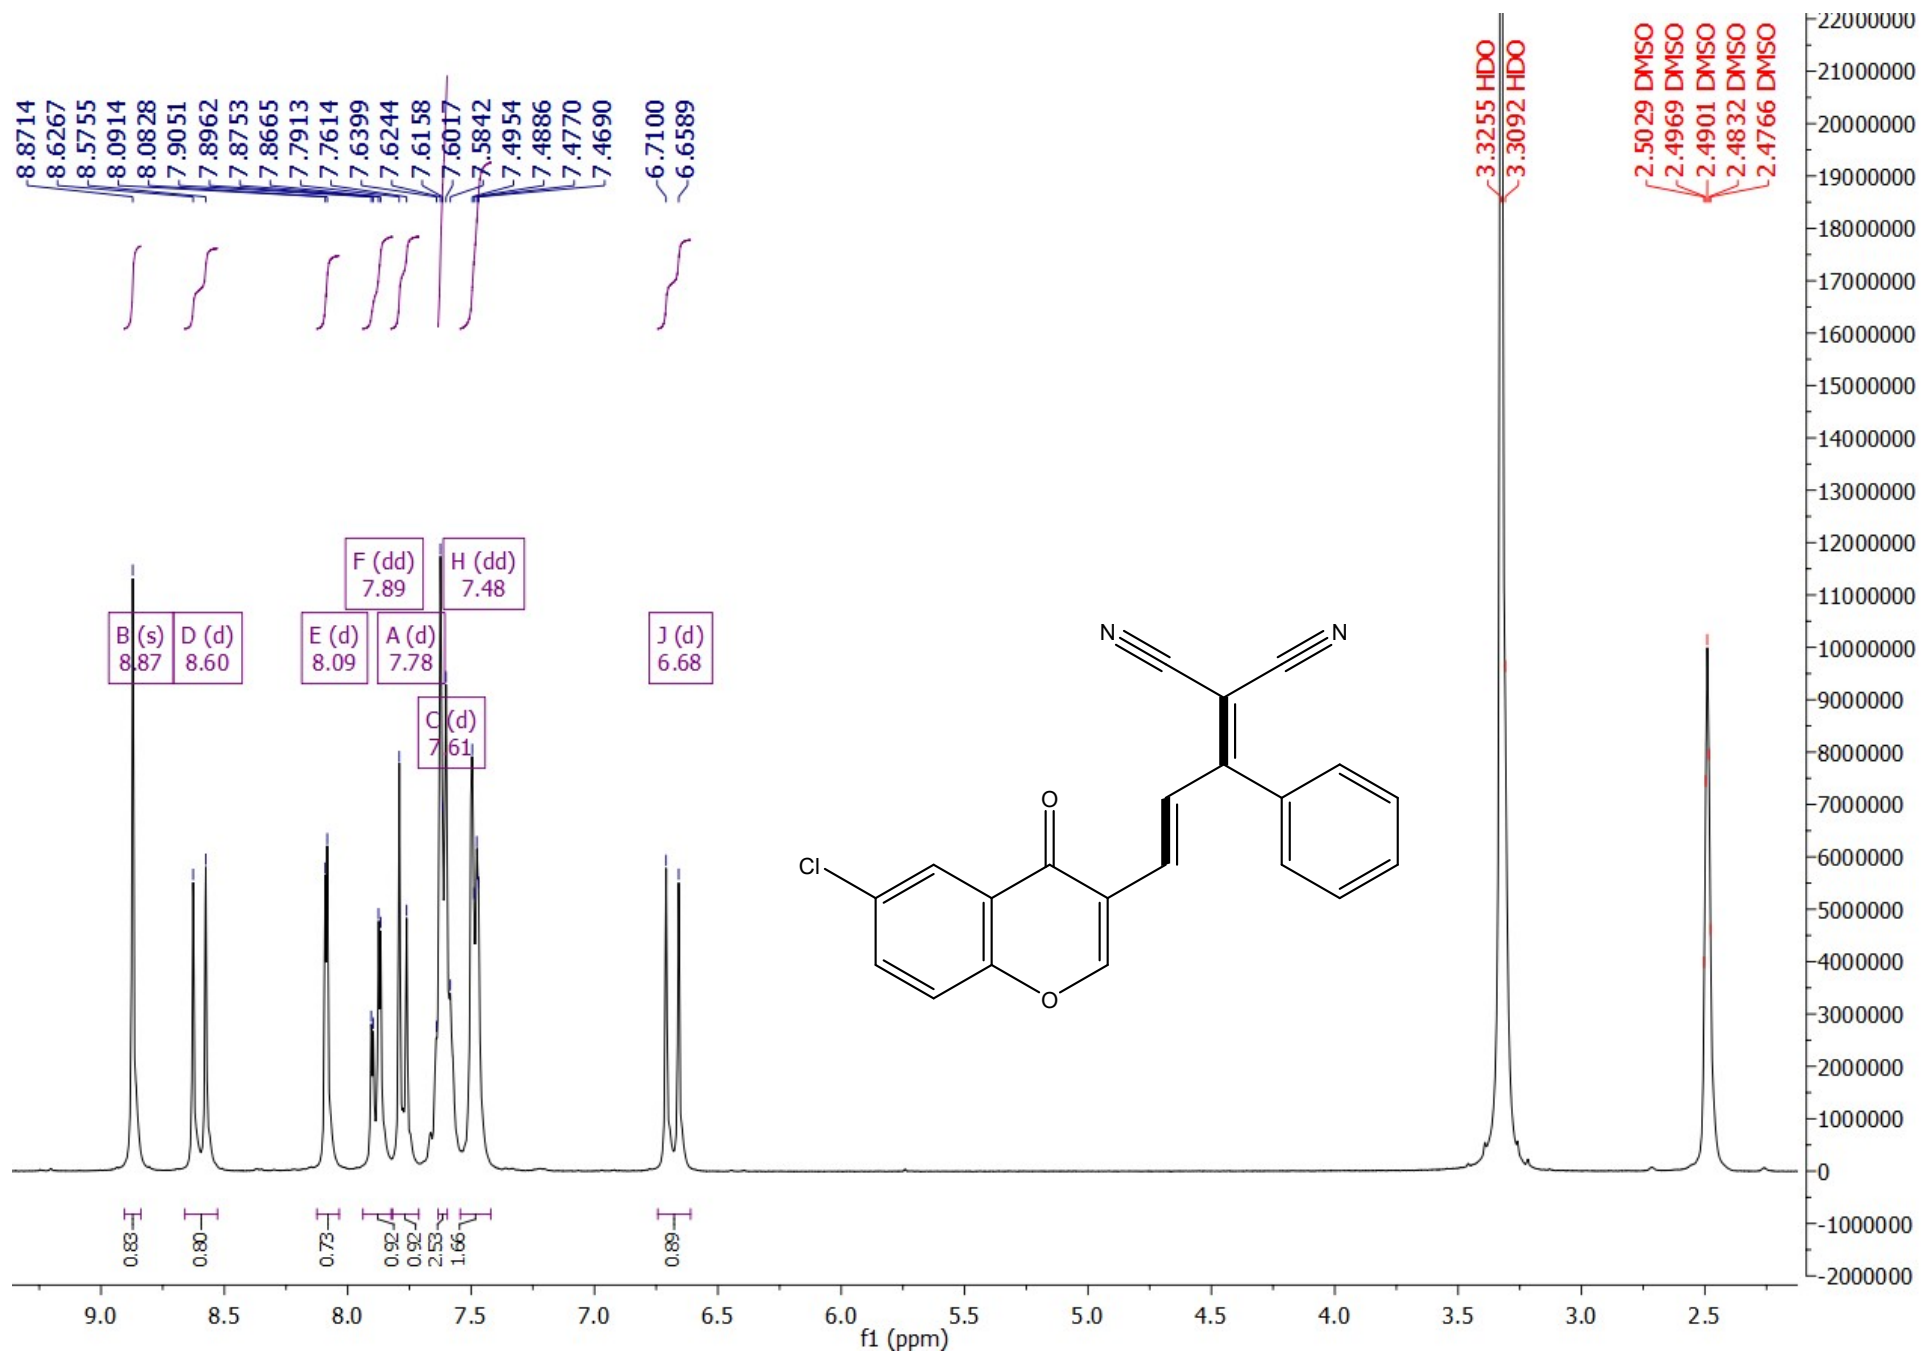

<sup>1</sup>H NMR of 3g

S42

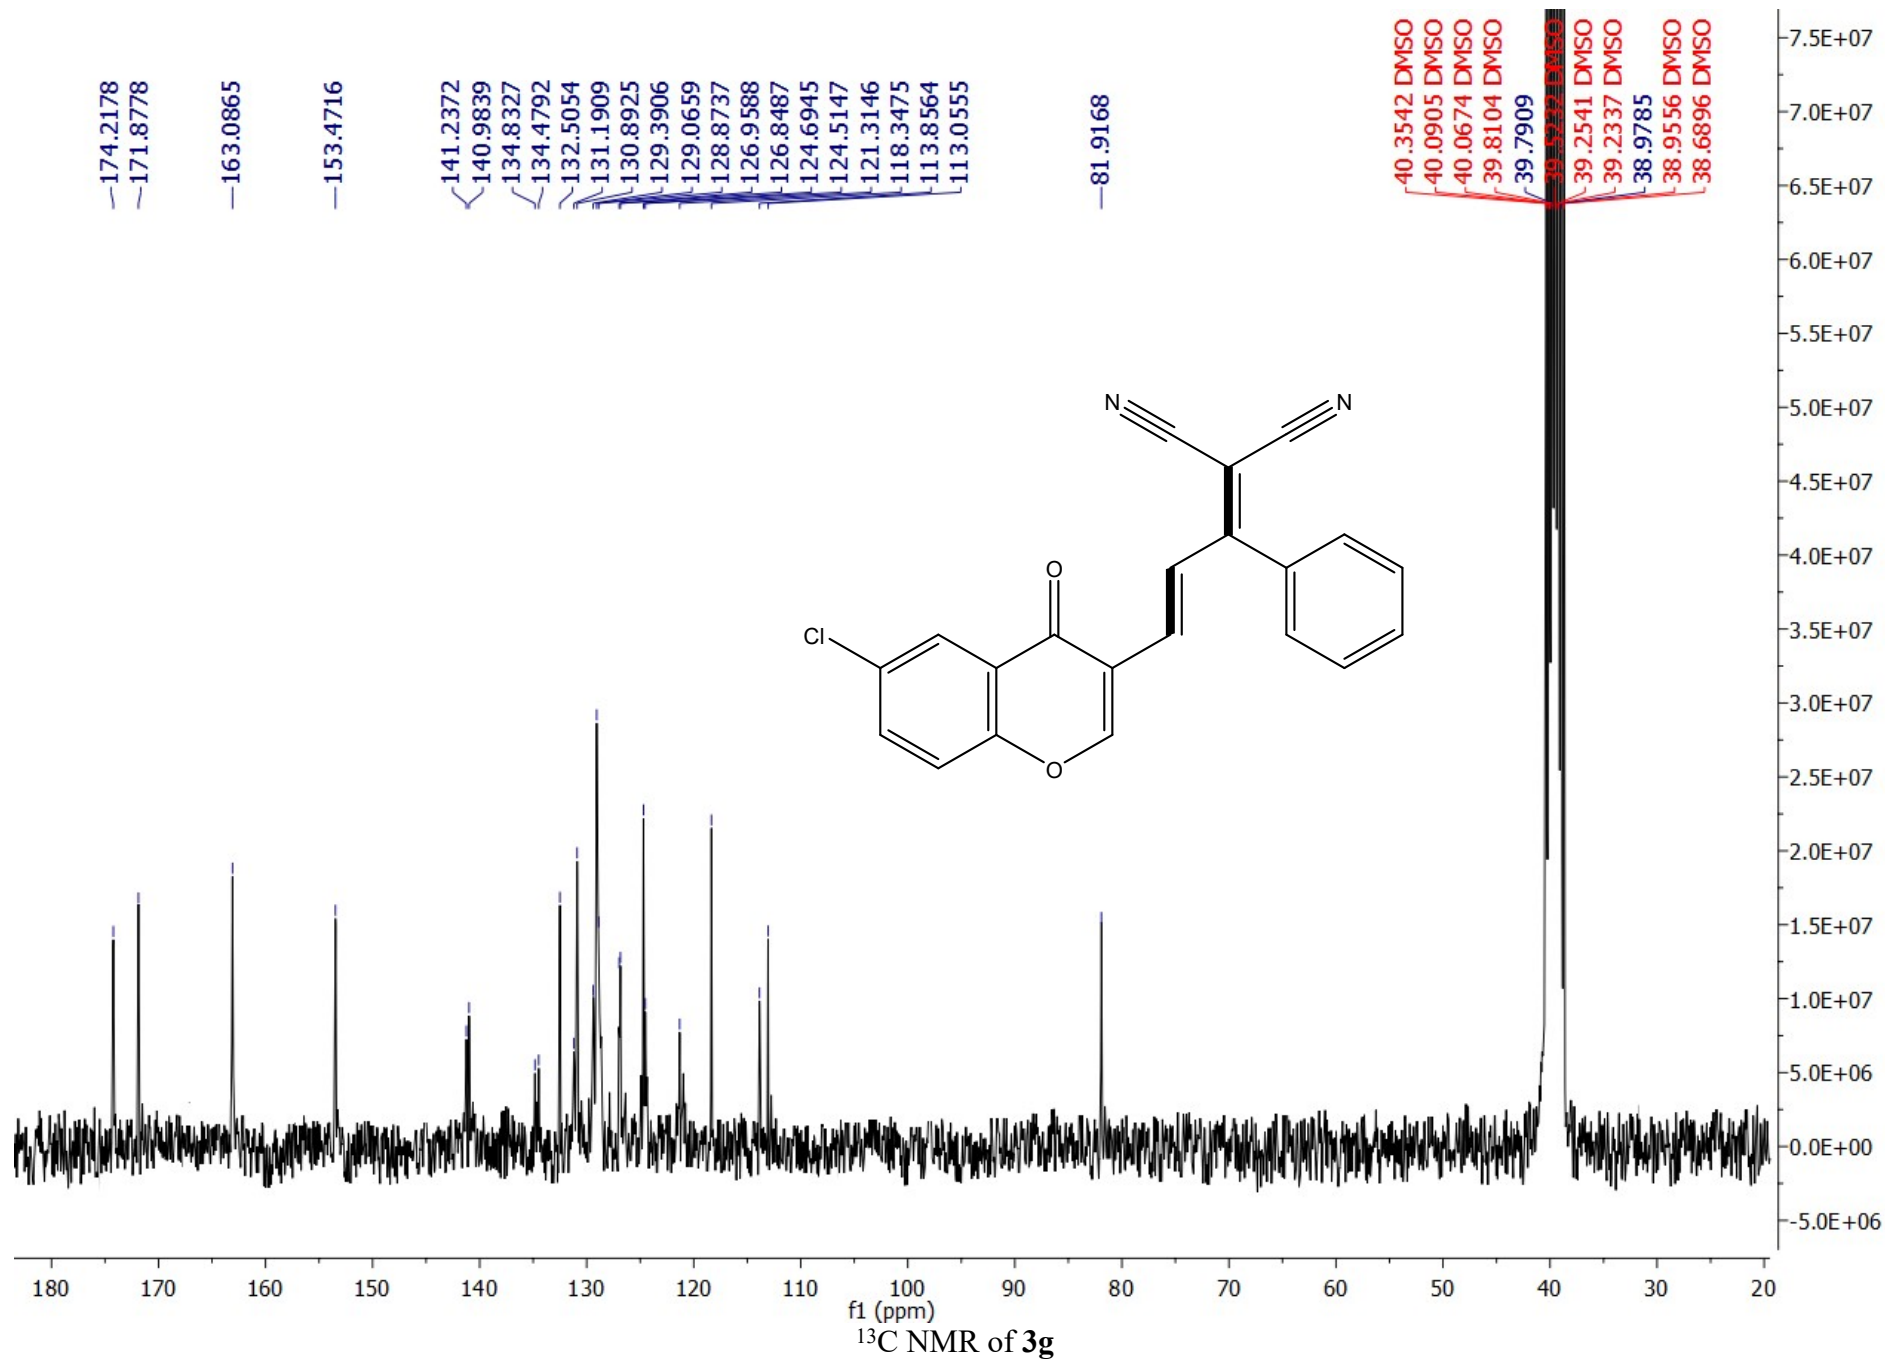

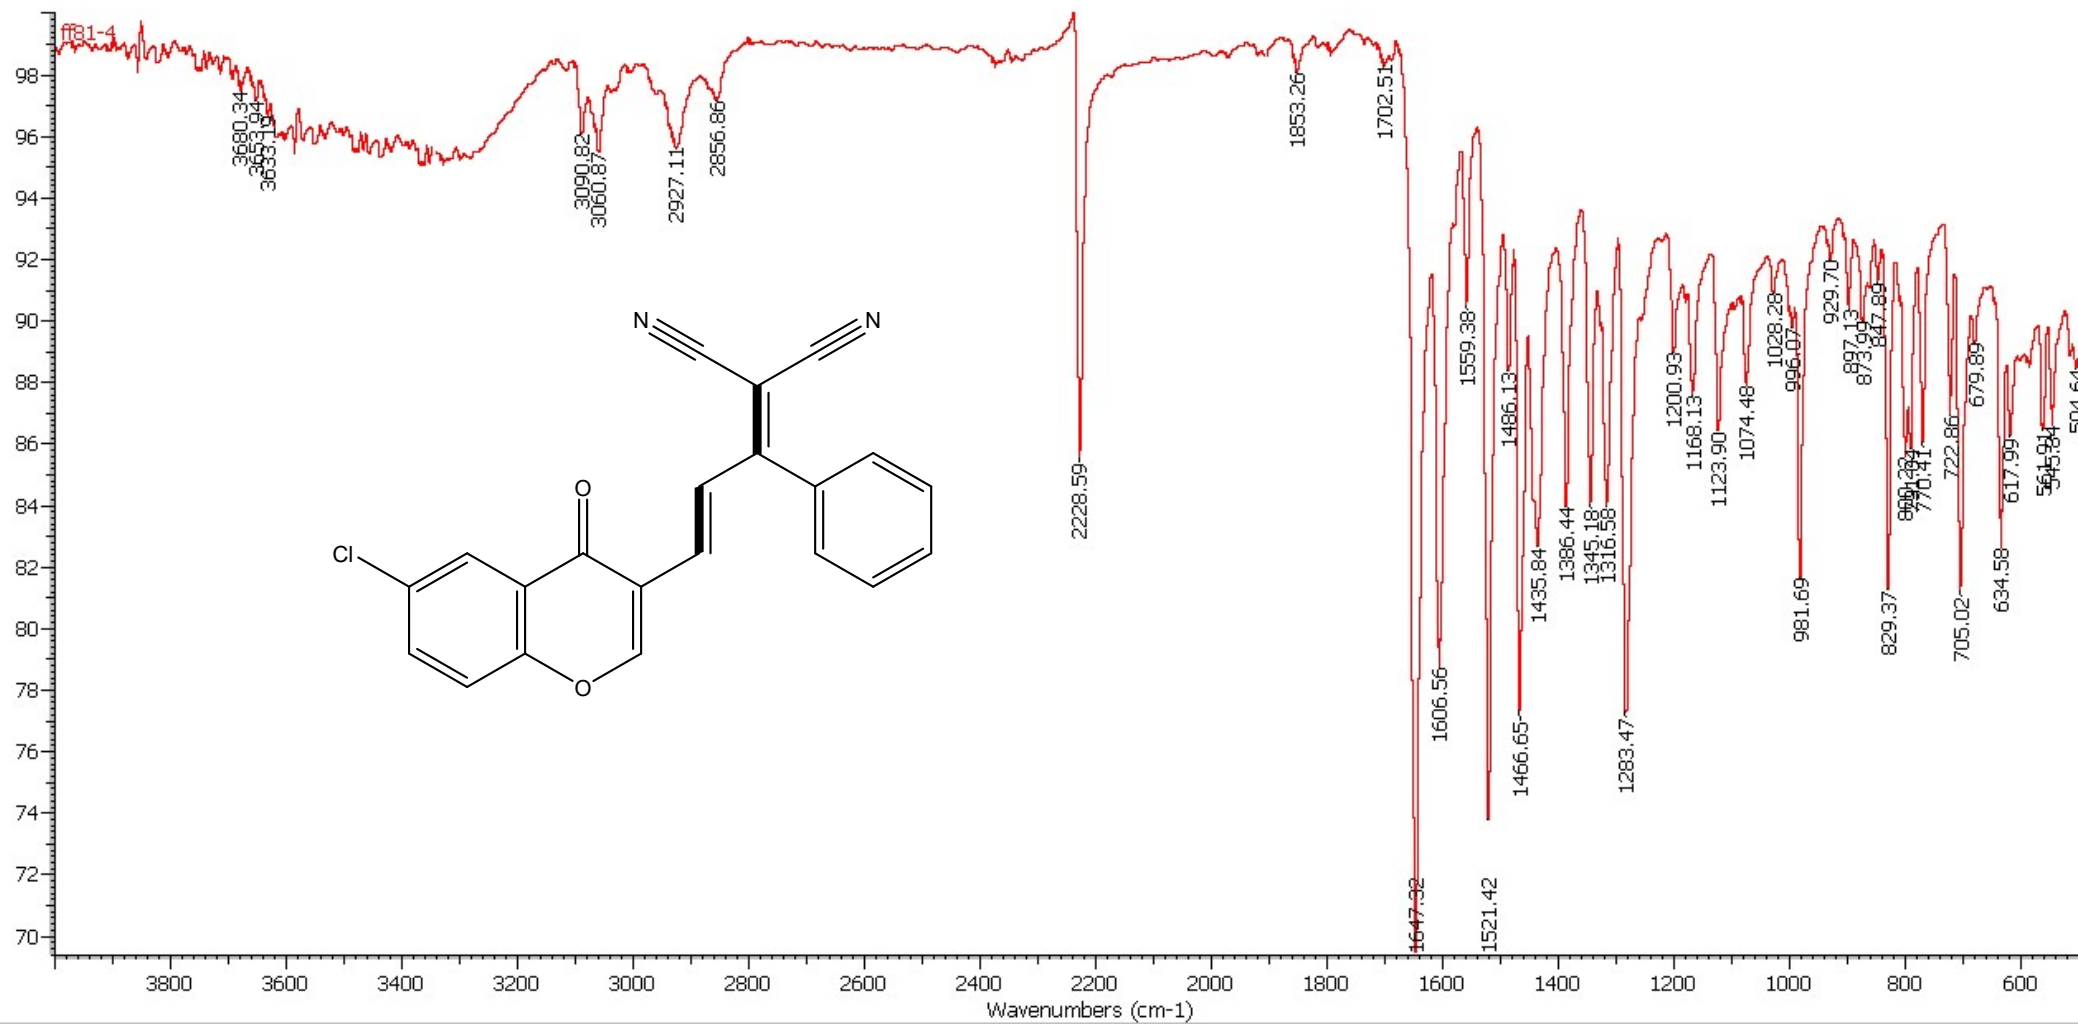

IR of 3g

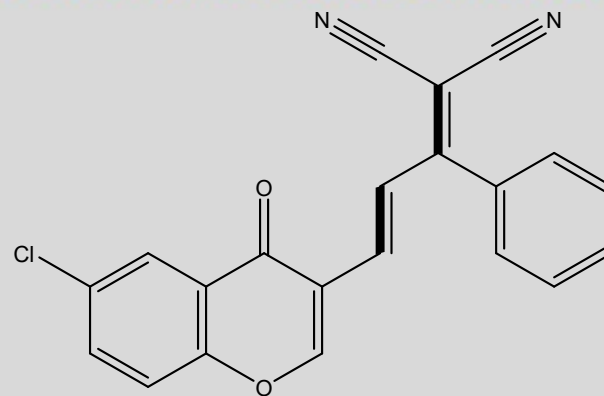

Mass of compound **3g**

S45

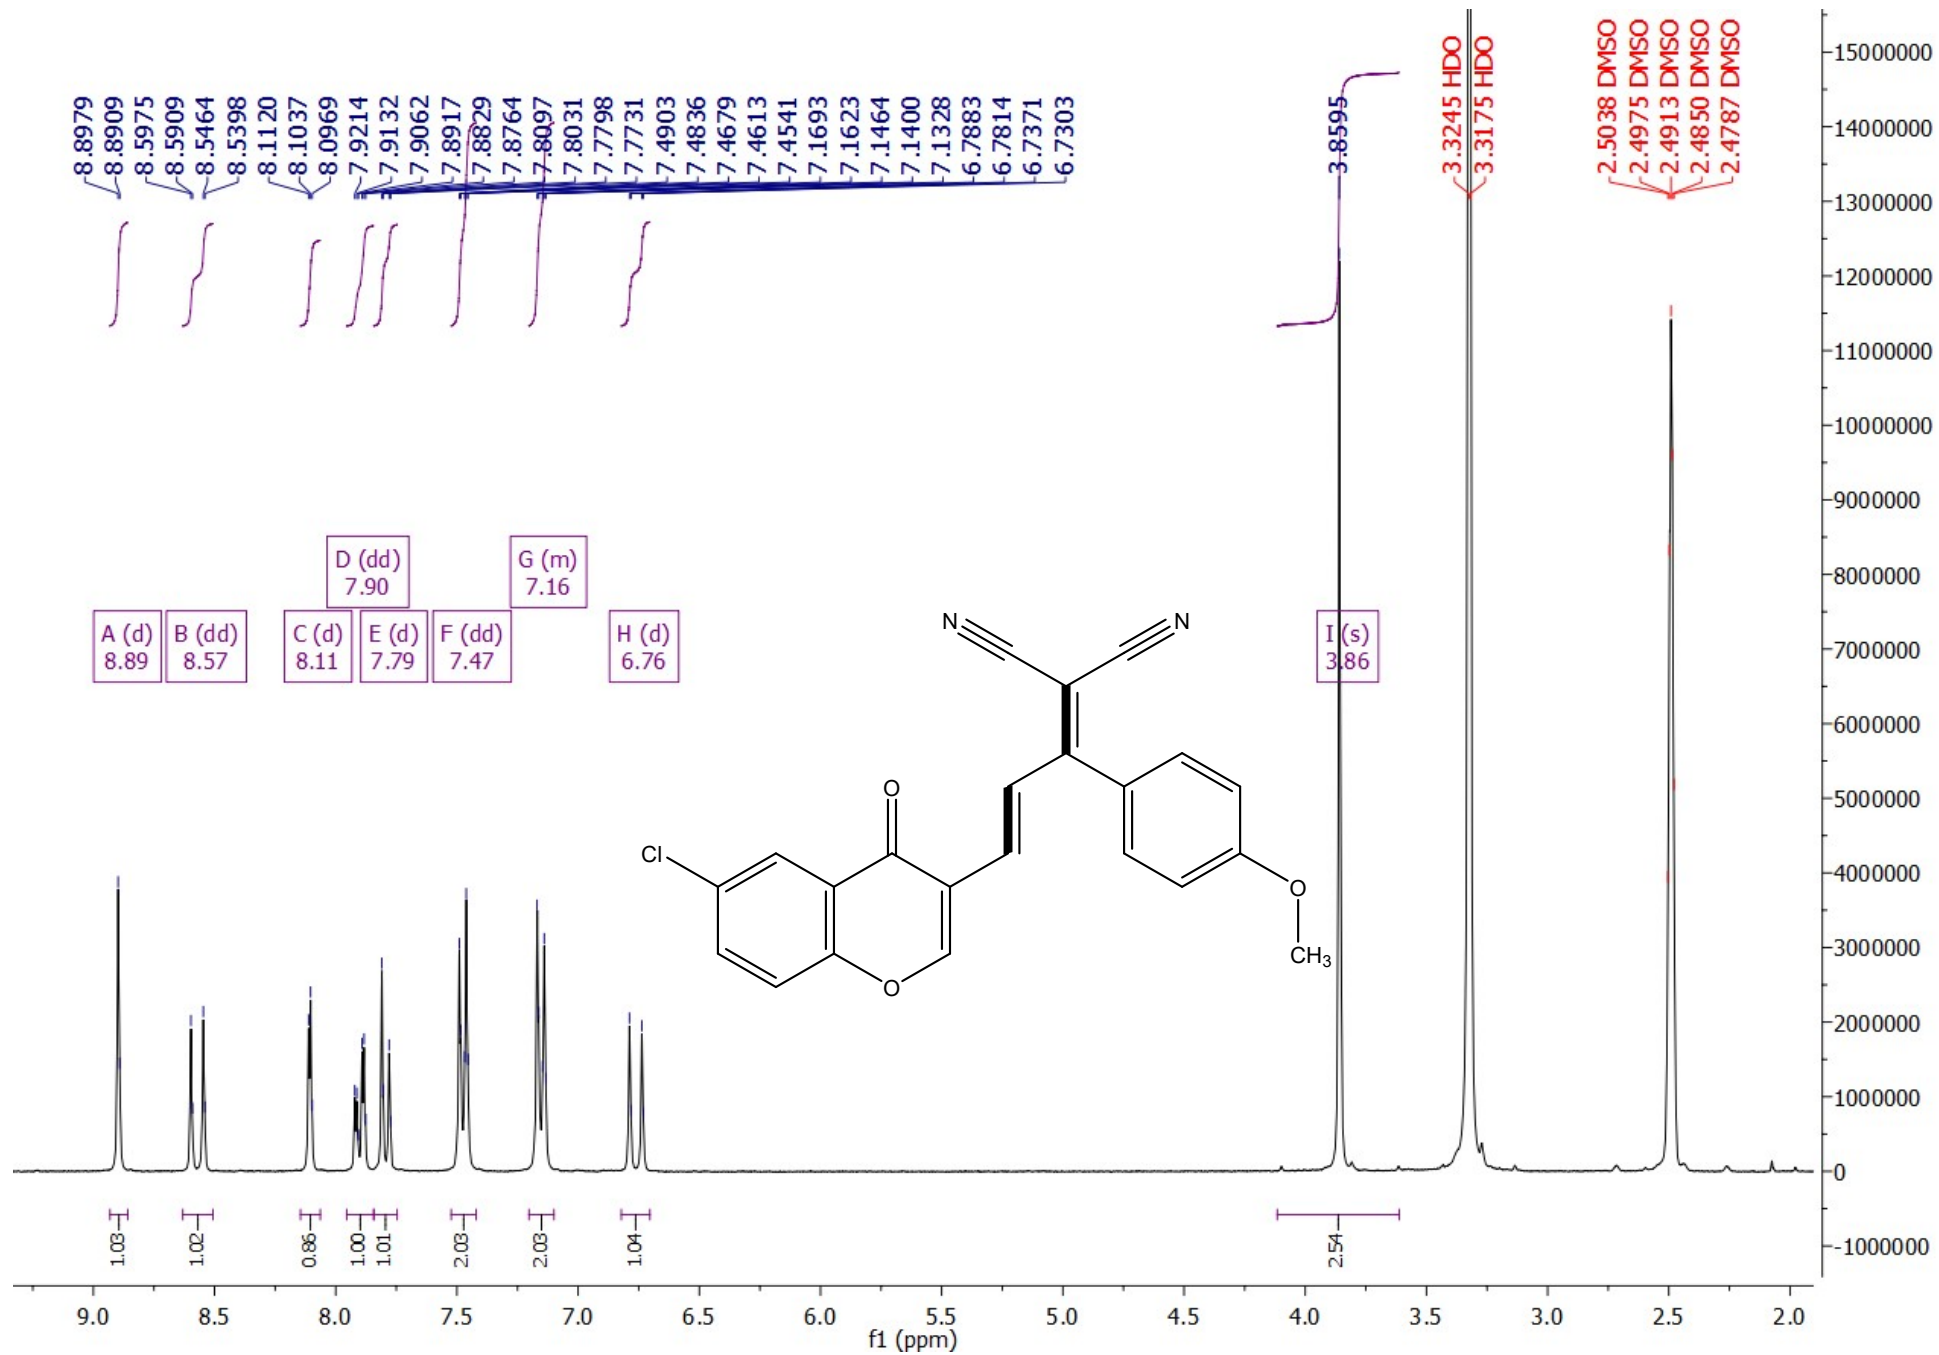

<sup>1</sup>H NMR of 3h

S46

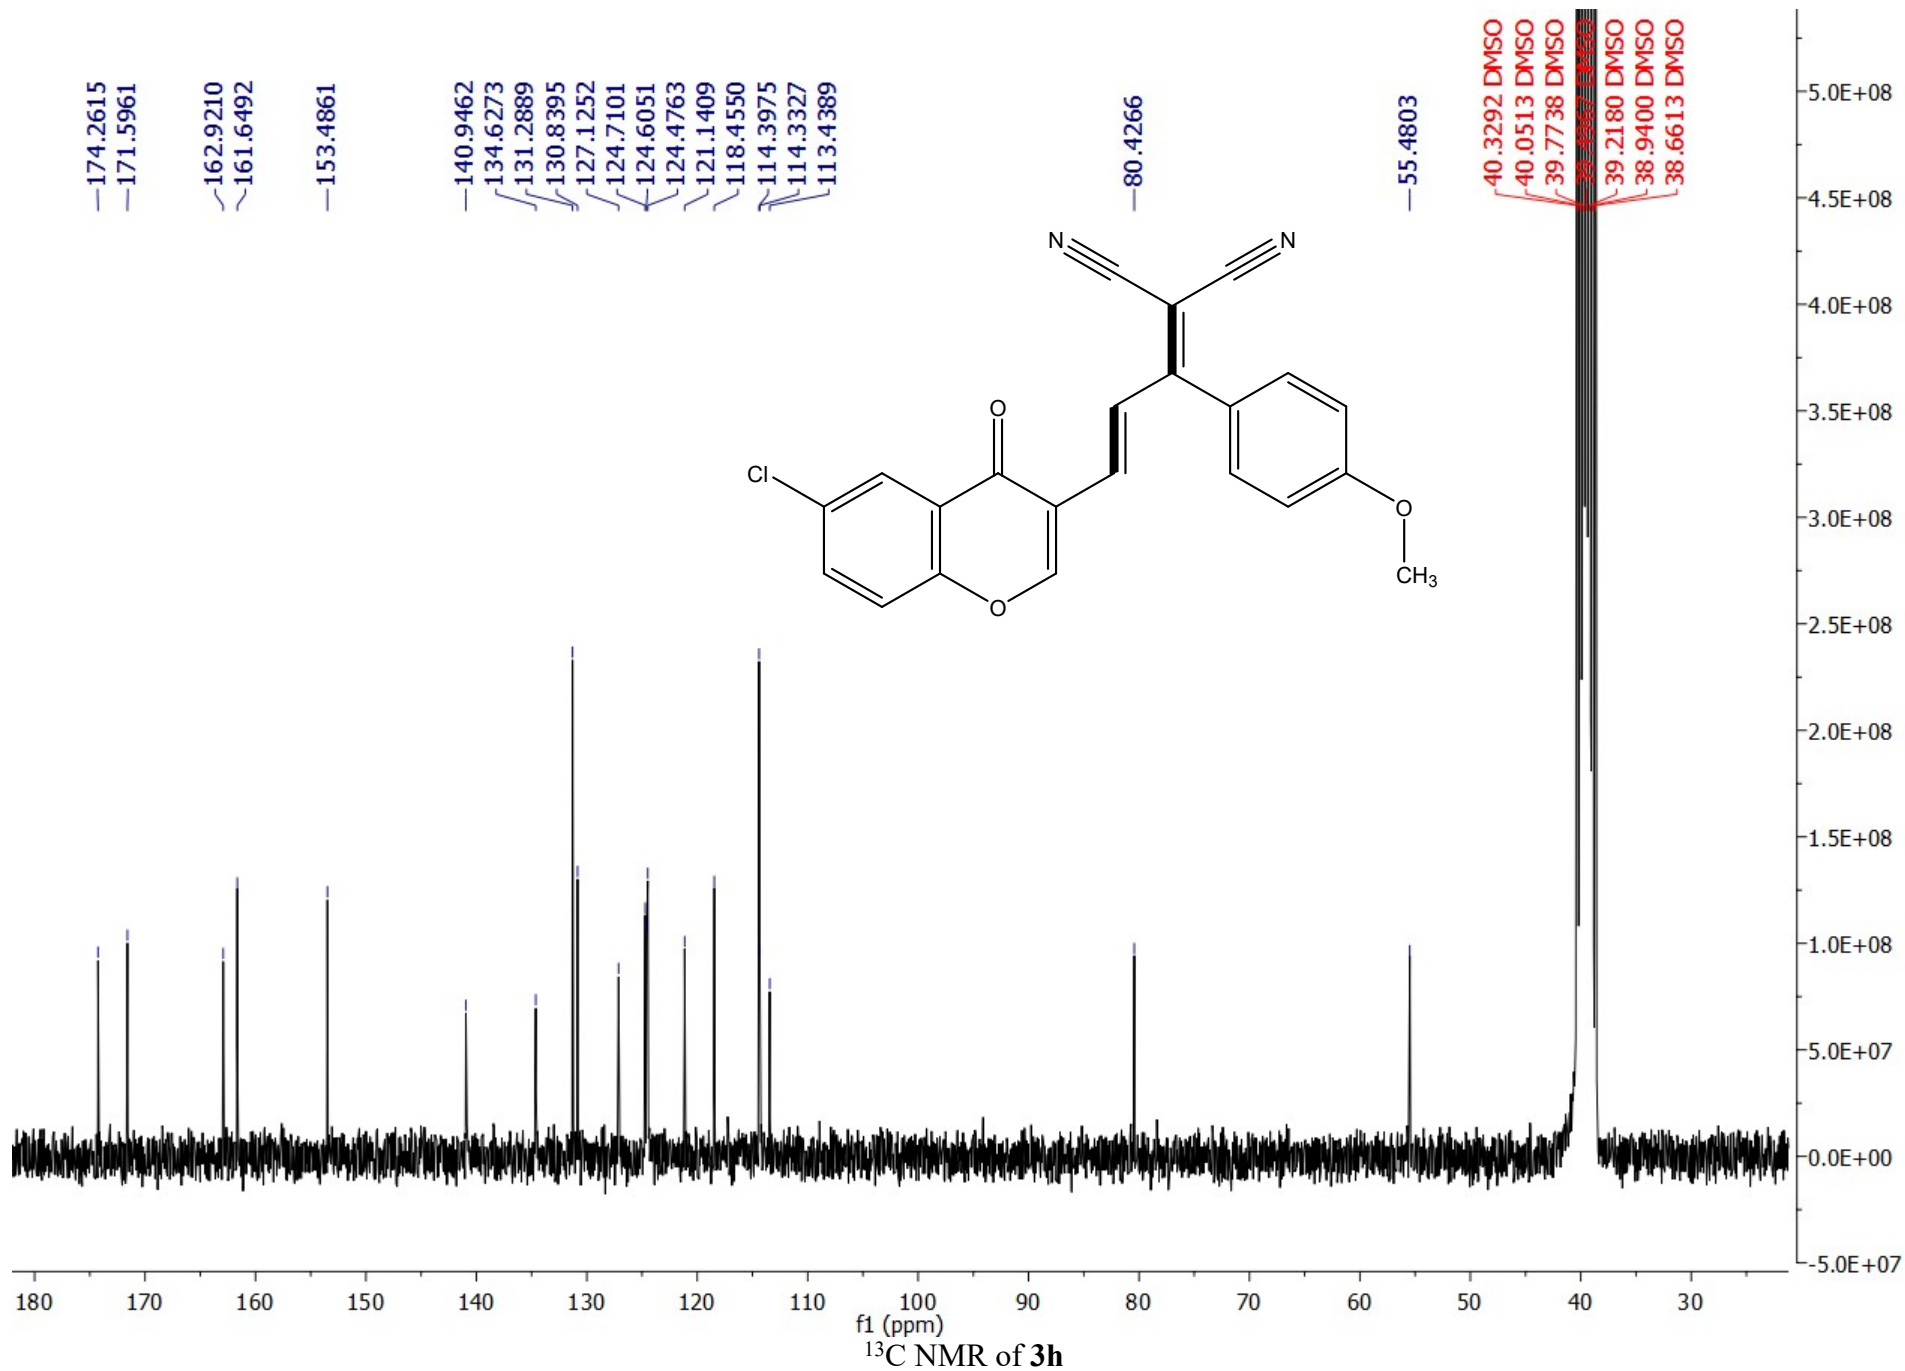



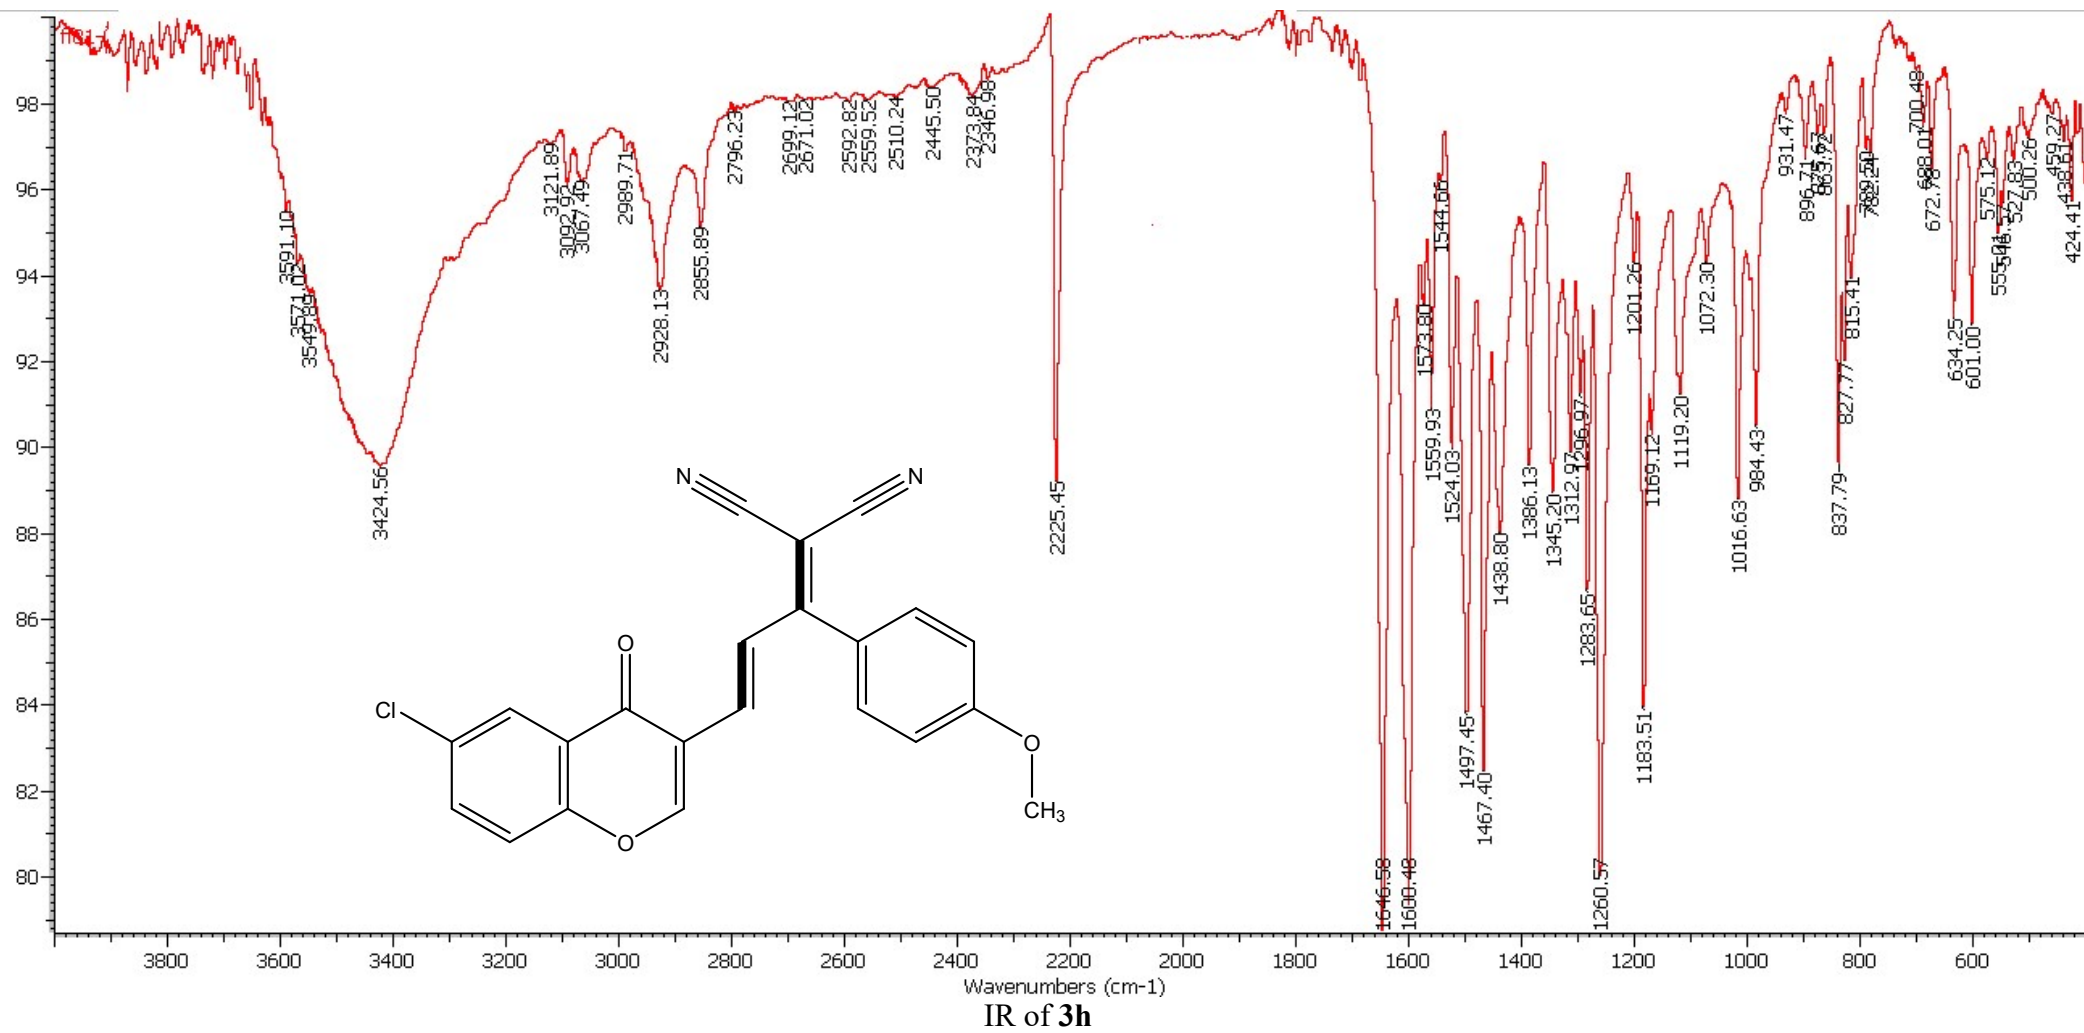



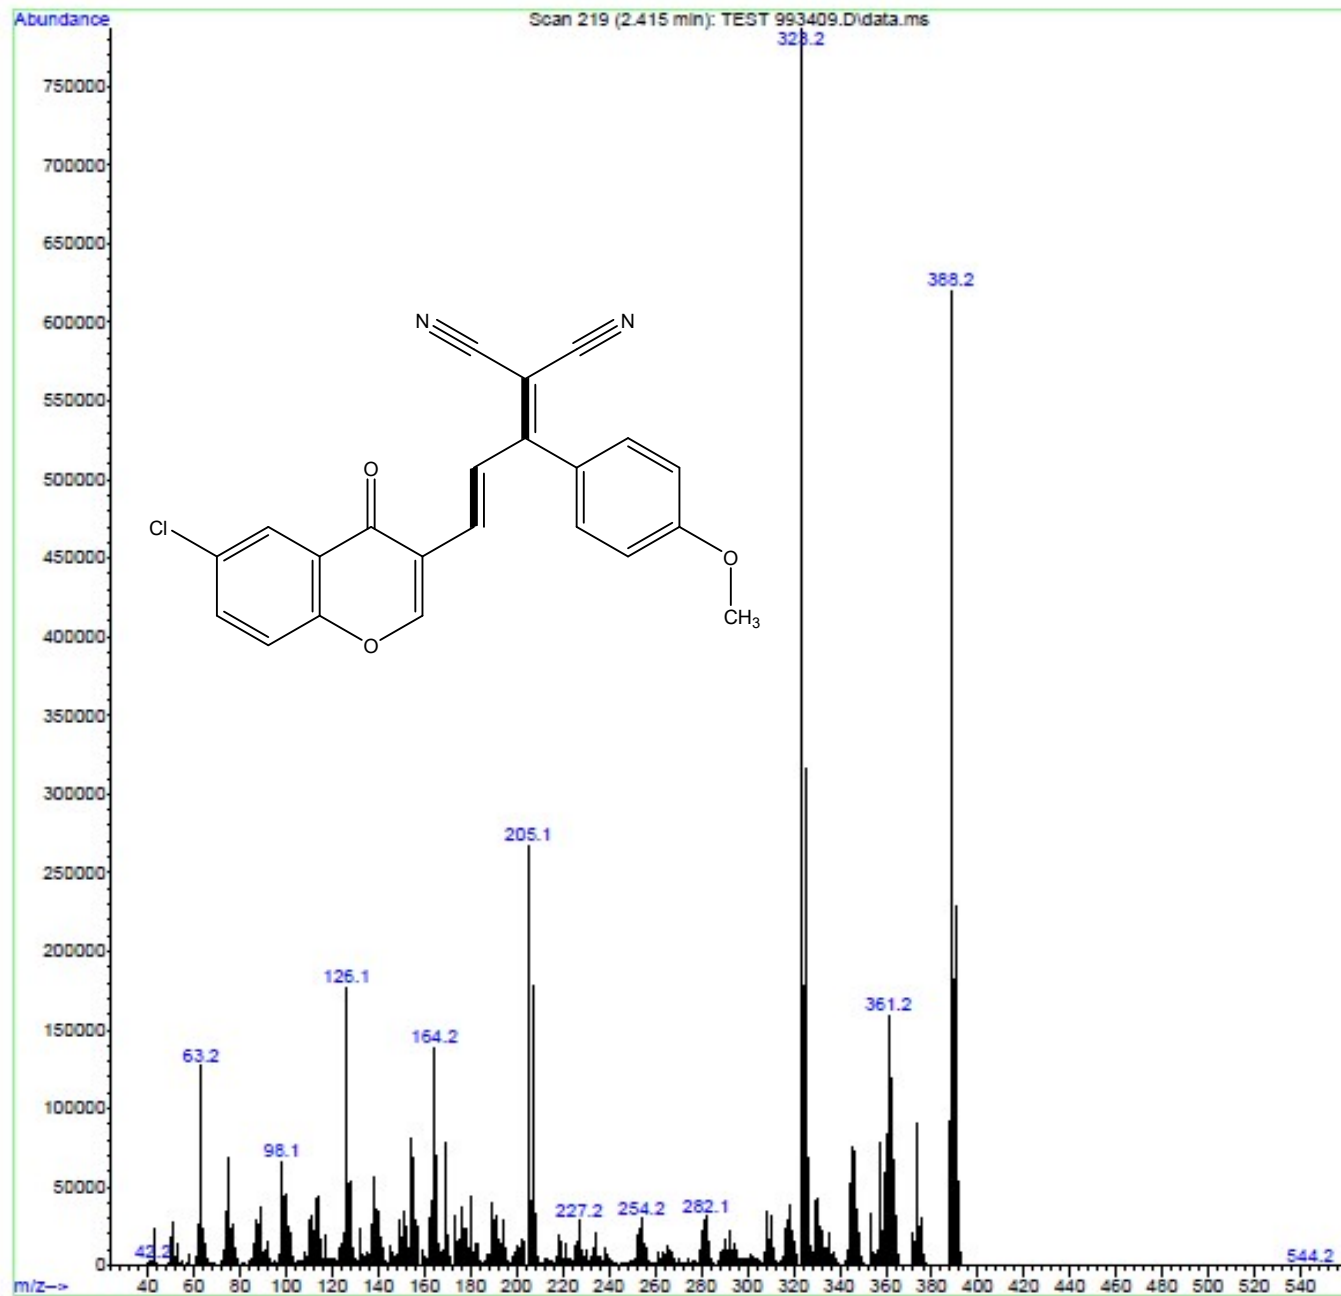

Mass of compound **3h**  
S49

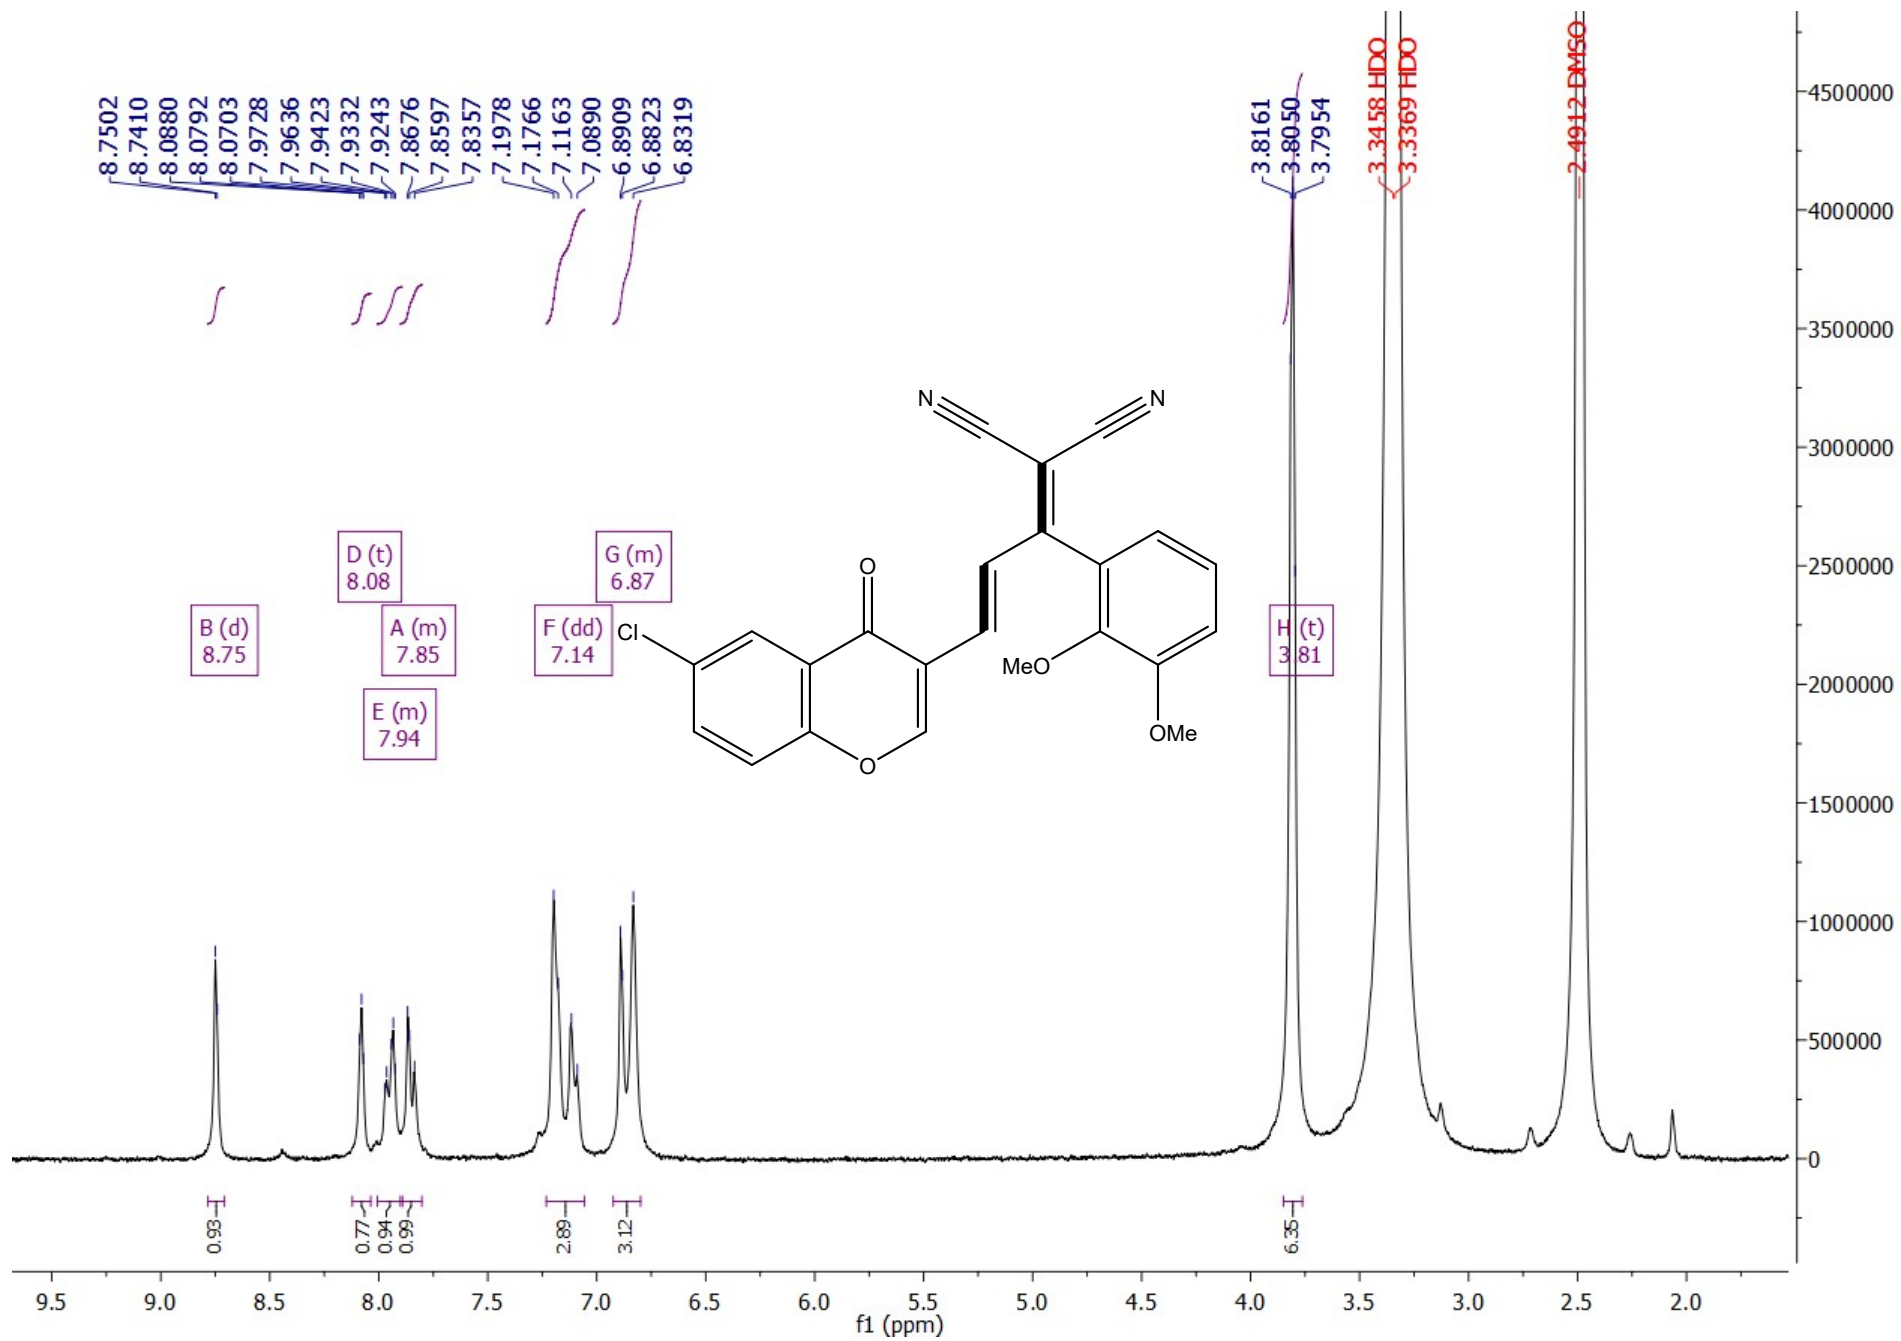

<sup>1</sup>H NMR of 3i

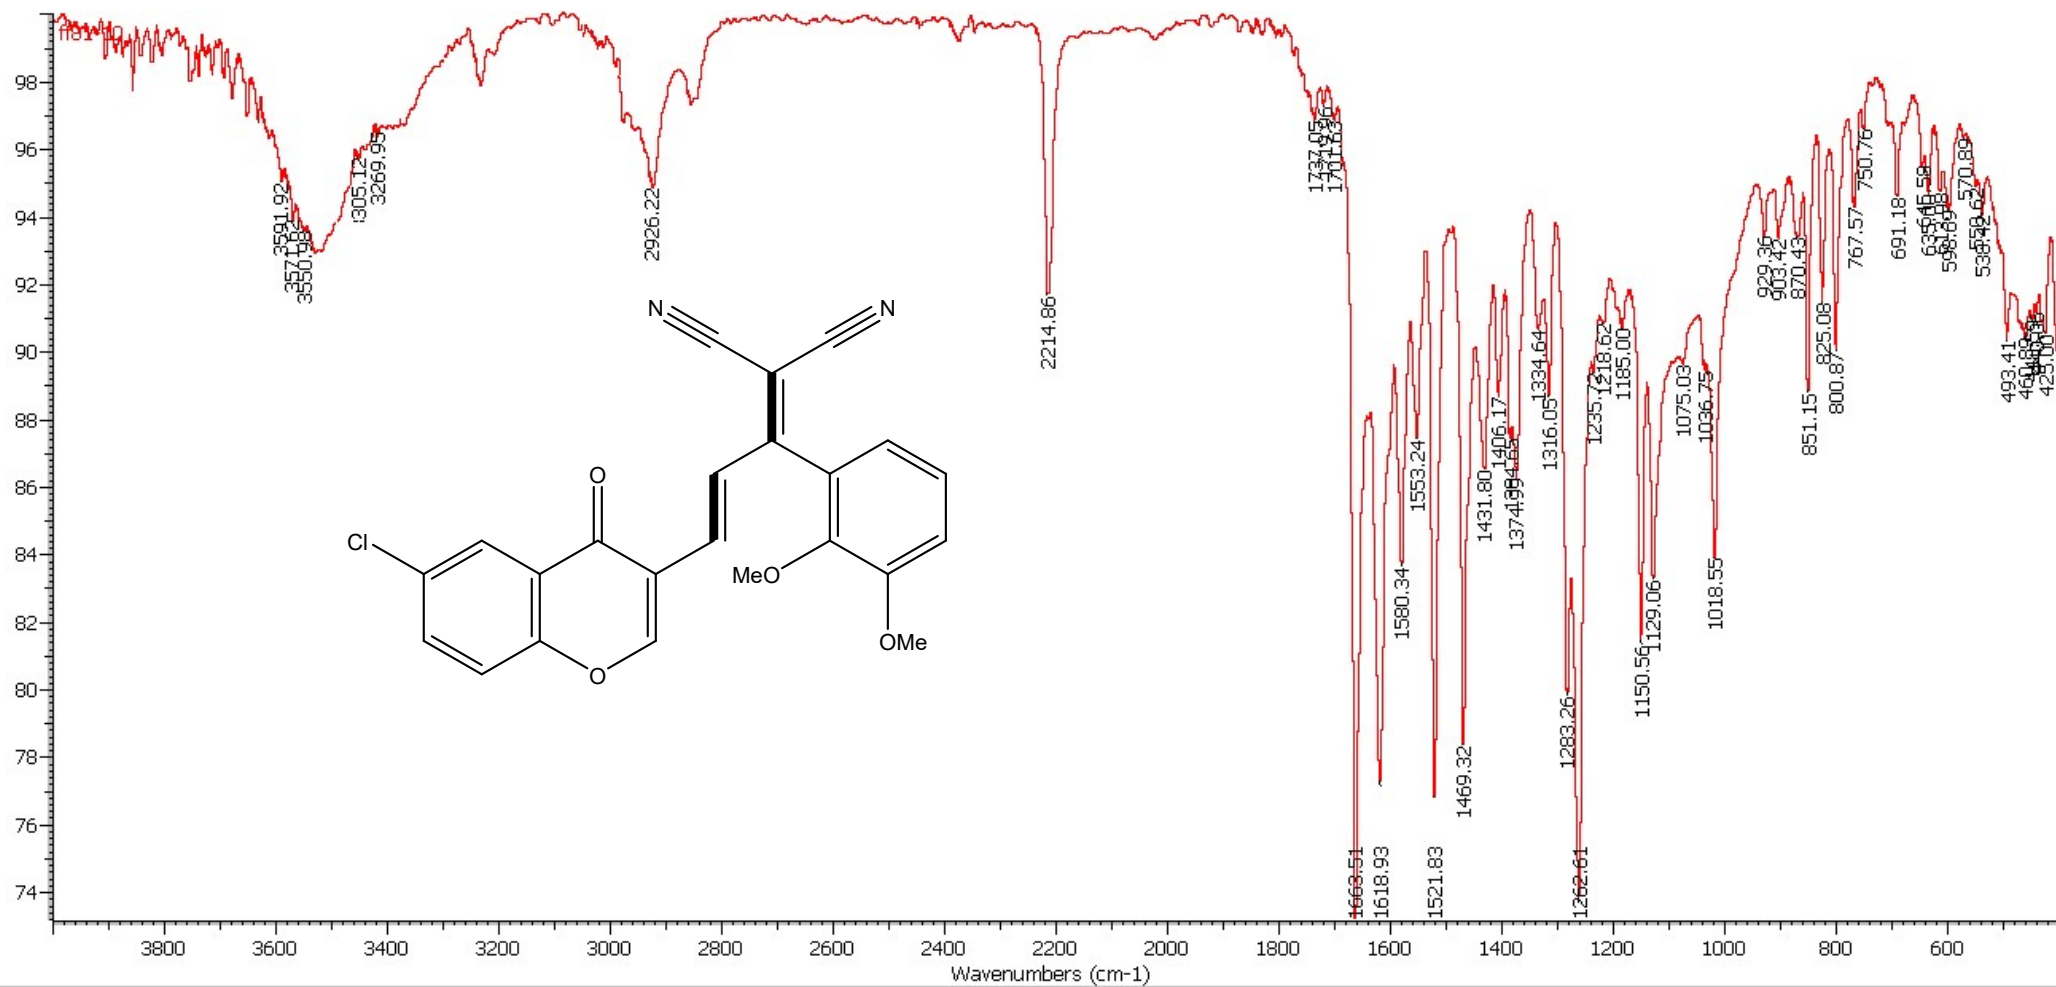

IR of 3i

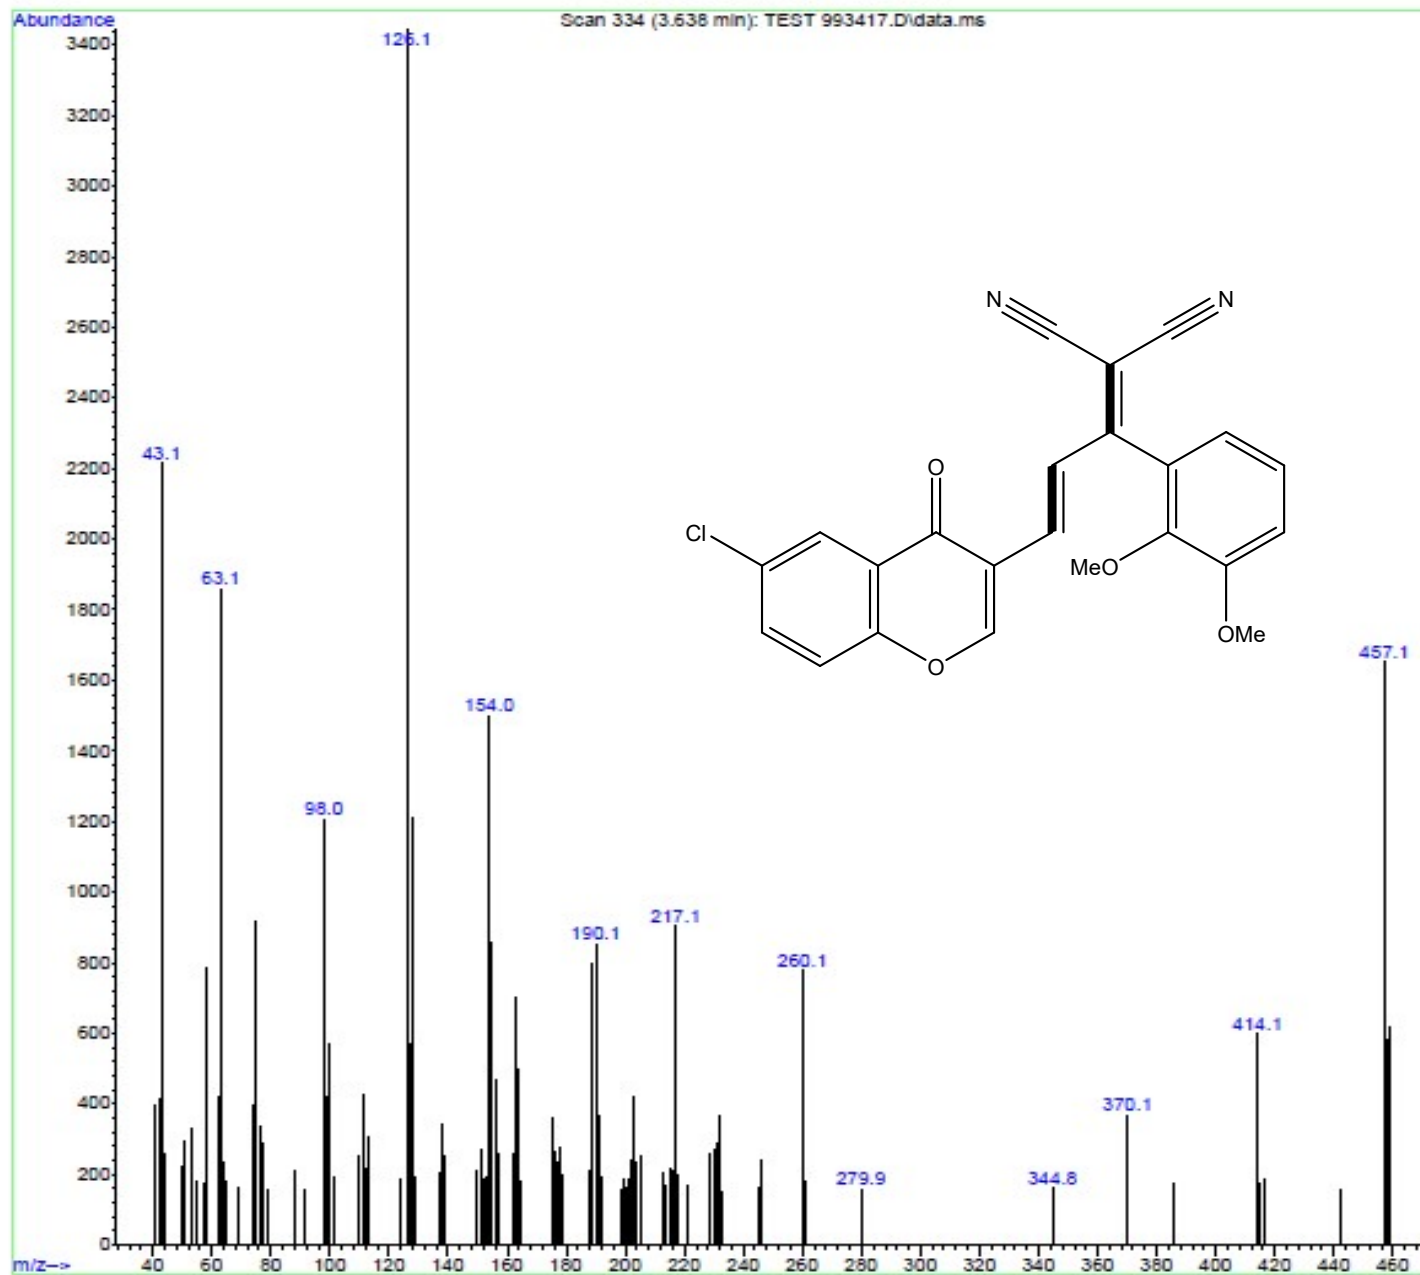

Mass of compound **3i**

S52

## Computational Section

Considering the importance of accurately selecting functions in the isomerization calculations, calculated single-point energies of stereoisomers of substituted chromonyl triene barbiturate were carried out using ORCA<sup>1</sup> with a domain-based local pair natural orbital coupled-cluster method, DLPNO-CCSD(T),<sup>2-3</sup> with DEF2-QZVPP and DEF2-QZVPP/C basis sets.<sup>4</sup> Moreover, several DFT functionals (with Def2-TZVP and, 6-311++G (d,p) basis sets),<sup>5</sup> were gauged with CCSD results and find a reliable method for predicting isomerization energies including the explicit account of the dispersion interactions.<sup>6</sup> The results elucidated the M06-2X /def2-TZVP approach as an optimal compromise between the accuracy and feasibility relative to CCSD results (Table 1). Therefore, all computational values reported here are obtained by, the M06-2X /def2-TZVP//B3LYP/6-31G(d) model. The B3LYP/6-31G(d) method<sup>7</sup> was applied to optimize geometries of reagents, intermediates, transition states, and to obtain vibrational frequencies for all molecules. It is important to refer that the AIM<sup>8</sup> and NMR calculations were carried out by the M06-2X /def2-TZVP level of theory via the integral equation formalism polarizable continuum model (IEF-PCM)<sup>9</sup> in acetonitrile solvent.

All quantum chemical calculations were performed using the Gaussian 09 program.<sup>10</sup> Considering the formation of different products from similar reactants motivated us to computationally evaluate the plausible reaction pathways. It seems that the chromonyl triene barbiturates **P**<sub>3a-3e</sub> were obtained through the C-C bond dissociation of the formed spirocyclic intermediate **In**<sub>1a-l</sub>, unlike dienes **P**<sub>3f-3i</sub> which likely do not involve a simple C-C cleavage. Accordingly, two possible pathways were investigated to rationalize the variety of the synthesized products **P**<sub>3a-3i</sub>. Considering a neutral diene **A** obtained from the [1,5]-sigmatropic H-shift of alylidenemalononitrile **2b** and deprotonated alylidenemalononitrile **2b** as a carbanion **B** (nucleophilicity parameters  $N = 2.88, 4.42$  eV, respectively; Table 3), initial analysis considered the nucleophilic attack of the latter to the chromonyl barbituric's acid **1b** or the annulation of the neutral diene **A** with dienophile **1b**. Such a

strategy is based on the demonstrated stability of the keteneimine  $R_2C=C=NH$  moiety that typically surpasses its alkylnitrile tautomeric analogue<sup>11-13</sup>. The calculated reaction free energy with the annulation intermediate ( $\Delta G_R = 10.15$  kcal/mol) show that the formed spirobarbiturate species **C** has a lower relative stability than the anionic **In<sub>1b</sub>** ( $\Delta G_R = -12.40$  kcal/mol) resulting from the carbanionic attack. Moreover, the kinetic aspects of both reactions promote the carbanionic pathway as a much more feasible, seen in 17.73 kcal/mol lower activation barrier (Fig. 3). The latter is particularly valid, given a typically high acidity of the C–H bond directly attached to the malononitrile moiety, as in **A**, which allows an efficient carbanion formation in solution. As an illustration, the  $pK_a$  value of system **A**, with two additional cyano substituents at the deprotonating C–H moiety, is 3.2 in acetonitrile, while that of an analogous derivative without the *p*-methoxyphenyl moiety is 3.3,<sup>14</sup> thereby verifying an earlier conclusion.

**Table 1.** Relative energies of *s*-trans,*s*-trans compared to *s*-trans,*s*-cis-conformers calculated using various DFT functionals and basis sets

| Basis set                          | M062X | M062X-D3 | B3LYP | B3LYP-BJD3 | Wb97XD | Cam-B3LYP |
|------------------------------------|-------|----------|-------|------------|--------|-----------|
| Def2-TZVP                          | 0.45  | -0.46    | 9.22  | -0.81      | -0.31  | 0.04      |
| 6-311++g(d,p)                      | -0.34 | -1.25    | 3.16  | -0.93      | -0.87  | -0.14     |
| DLPNO-CCSD DEF2-QZVPP DEF2-QZVPP/C |       |          |       |            | 0.41   |           |

**Table 2.** B3LYP/6-3G(d) global electronic chemical potential,  $\mu$ , chemical hardness,  $\eta$ , electrophilicity,  $\omega$ , and nucleophilicity,  $N$ , in eV, of chromonyl barbituric's acid **1b**, neutral diene **A**, and carbanion **B** in CH<sub>3</sub>CN

| Compound                              | $\mu$ | $\eta$ | $\omega$ | $N$  |
|---------------------------------------|-------|--------|----------|------|
| chromonyl barbituric's acid <b>1b</b> | -4.62 | 4.08   | 1.59     | 2.10 |
| neutral diene <b>A</b>                | -3.53 | 4.69   | 1.08     | 2.88 |
| carbanion <b>B</b>                    | -2.21 | 4.25   | 0.38     | 4.42 |





| <b>Table 3:</b> Single point energy $P_{3b}$ and $P_{3'b}$ compounds with different methods |                         |             |                         |             |
|---------------------------------------------------------------------------------------------|-------------------------|-------------|-------------------------|-------------|
| Compound                                                                                    | $P_{3b}$                |             | $P_{3'b}$               |             |
| Methods                                                                                     | 6-311++g(d,p)           | DEF2-TZVP   | 6-311++g(d,p)           | DEF2-TZVP   |
| M06-2X-D3                                                                                   | -1750.39048             | -1750.58393 | -1750.39247             | -1750.58466 |
| CAM-B3LYP                                                                                   | -1750.27033             | -1750.47144 | -1750.27055             | -1750.47139 |
| WRB97XD                                                                                     | -1750.46776             | -1750.66399 | -1750.46914             | -1750.66449 |
| B3LYP-D3BJ                                                                                  | -1751.20919             | -1751.40764 | -1751.21067             | -1751.40894 |
| B3LYP                                                                                       | -1751.06294             | -1751.26139 | -1751.05789             | -1751.24669 |
| M062x                                                                                       | -1750.38556             | -1750.57901 | -1750.3861              | -1750.57829 |
| Reference Method                                                                            | DEF2-QZVPP DEF2-QZVPP/C |             | DEF2-QZVPP DEF2-QZVPP/C |             |
| DLPNO-CCSD                                                                                  | -1747.807091330795      |             | -1747.806438573041      |             |

Single point input for  $P_{3b}$  compound

0 1

O 5.91673900 0.87490500 1.15664600  
O 3.87068200 -1.82523000 -1.13468200  
O -5.07217900 0.03974800 -1.90863900  
O -2.07412300 -1.67509000 1.32710300  
O -1.51881700 5.38678500 0.85149900  
O -6.54020300 -2.50761100 1.56329800  
N -5.80107000 -1.22852900 -0.18546400  
N -2.51696700 0.35002100 -2.30838600  
N -4.30091000 -2.14881700 1.40357500  
N -0.38014400 -3.23993400 -1.43311100  
C 0.06014900 0.15149000 -0.61221200  
C -0.90404100 -0.75810900 -0.94920600  
C -2.33684300 -0.39825600 -1.21948100  
C -0.32768800 1.54368100 -0.25092400  
C -3.41424400 -0.87438000 -0.46265300  
C 3.82962400 0.16425000 0.18210900  
C 4.46876500 -1.01803500 -0.43667300  
C 5.91551100 -1.15298200 -0.15105800  
C -0.59659000 -2.12961900 -1.19065900  
C 1.45794300 -0.25351500 -0.54332400  
H 1.72440700 -1.21287800 -0.96803000

C 2.41746000 0.49116100 0.05008800  
H 2.12772300 1.43416100 0.50629300  
C -4.77454900 -0.63888500 -0.91743500  
C -1.08809600 4.16249200 0.44168800  
C 6.58165600 -0.20659900 0.63185600  
C -3.17095500 -1.57588400 0.79372400  
C -1.20379500 1.77875300 0.82166800  
H -1.57404900 0.93643300 1.39454000  
C -0.21024900 3.94661300 -0.62566700  
H 0.18080700 4.77270900 -1.20408800  
C 0.16895100 2.64494300 -0.95308800  
H 0.85317100 2.48977600 -1.78028400  
C -1.57530500 3.06820600 1.16767000  
H -2.24304400 3.25391400 2.00027900  
C 4.60374100 1.00993100 0.91712500  
H 4.21342600 1.89958500 1.39626400  
C 6.65539700 -2.23454100 -0.65762400  
H 6.13078400 -2.96440600 -1.26201400  
C -5.61111600 -2.00134600 0.96395200  
C 8.00656800 -2.35110300 -0.38354800  
H 8.57051300 -3.18866100 -0.77629900  
C 7.94344800 -0.30796400 0.91750200  
H 8.41652000 0.45000300 1.52933400  
C 8.64975800 -1.38474300 0.40562600  
H 9.70811700 -1.47825700 0.61965600  
C -7.17430600 -1.01758800 -0.66331500  
H -7.40221400 0.04845900 -0.67333400  
H -7.84364900 -1.54339700 0.00983700  
H -7.27493400 -1.40242600 -1.67826200  
C -4.11987500 -2.92624500 2.63773800  
H -3.05289200 -3.05441600 2.78994400  
H -4.61488400 -3.89041700 2.53386200  
H -4.55853500 -2.39884300 3.48648600  
C -1.07080600 6.54113800 0.15097300  
H 0.01766300 6.64692200 0.21071500

H -1.54278200 7.38873400 0.64450000  
H -1.37979200 6.51503200 -0.89930100  
H -3.47775500 0.57561200 -2.57344700  
H -1.72481400 0.60792100 -2.87386600

Single point input for  $P_{37b}$  compound

0 1

O 0.98956100 -2.43639600 0.28322200  
C 1.44312200 -0.74902500 -1.33355300  
O -0.91875400 1.01276100 2.05182200  
C 1.80398800 -1.84153600 -0.41025100  
O 1.87223800 3.59761300 -0.74751200  
O 3.57748300 0.37835000 1.93469300  
O 3.72946900 -0.46007900 -2.00765300  
N 2.71350000 2.09937600 0.71918600  
C 1.63556800 2.71993100 0.09232600  
N 1.32322700 0.71443400 2.02627200  
C 0.11955000 -0.15960200 -1.40858500  
C 0.31528300 2.23483300 0.42878800  
C 1.16648100 -0.34974400 3.02357500  
H 2.13521900 -0.54745700 3.46781000  
H 0.79139000 -1.25294900 2.54228900  
H 0.45261900 -0.02329200 3.77436300  
C 2.43086200 -0.15162600 -2.05173300  
C 3.74321600 -3.13517100 0.50018900  
H 3.03487200 -3.66854900 1.11919600  
C 2.59979300 1.00943900 1.58112100  
C 4.05979000 2.50691400 0.31251500  
H 4.31415400 2.07757700 -0.65810500  
H 4.76437000 2.15230600 1.05599800  
H 4.08932400 3.58927400 0.23103100  
C 4.14989600 -1.44947800 -1.15520000  
C 3.24360500 -2.15095100 -0.36209000  
C 0.14839600 1.31176700 1.54381000  
C 5.51674000 -1.70160600 -1.11542800

H 6.18063900 -1.12713500 -1.74672700  
H 0.04640000 0.69278100 -2.07787400  
C 5.98333900 -2.67866700 -0.25664500  
C 5.09622700 -3.39779200 0.55367200  
H 7.04498500 -2.88357400 -0.20944300  
H 5.47582400 -4.15604900 1.22552600  
H 2.24924100 0.67729800 -2.72377400  
C -0.75547500 2.52385500 -0.42964400  
C -0.95321900 -0.46527100 -0.66009800  
H -0.94082500 -1.35057500 -0.04130200  
N -0.66471300 3.49915300 -1.33269500  
H -1.41083600 3.65749700 -1.98891100  
C -2.13458800 0.38633000 -0.54323200  
C -2.03520400 1.75295700 -0.47538000  
C -3.42108400 -0.31043500 -0.41221400  
C -4.38305600 0.08500700 0.52015300  
C -3.68590700 -1.44834300 -1.19196100  
C -5.57945200 -0.60255400 0.65947700  
H -4.18065800 0.92069100 1.17493300  
C -4.87837000 -2.13026500 -1.07671800  
H -2.94686600 -1.78609600 -1.90739600  
C -5.83973300 -1.71017900 -0.14995900  
H -6.29073700 -0.27413400 1.40222900  
H -5.09256800 -2.99645600 -1.68814300  
C -7.99916600 -2.07393200 0.80960300  
H -8.80534400 -2.78802200 0.66001400  
H -7.64933700 -2.13361400 1.84434600  
H -8.36611500 -1.06363200 0.60707900  
O -6.97597800 -2.44564300 -0.10491000  
C -3.19035200 2.58352200 -0.54624000  
N -4.07242200 3.32258800 -0.64627400  
H 0.21343700 4.01214100 -1.38365400

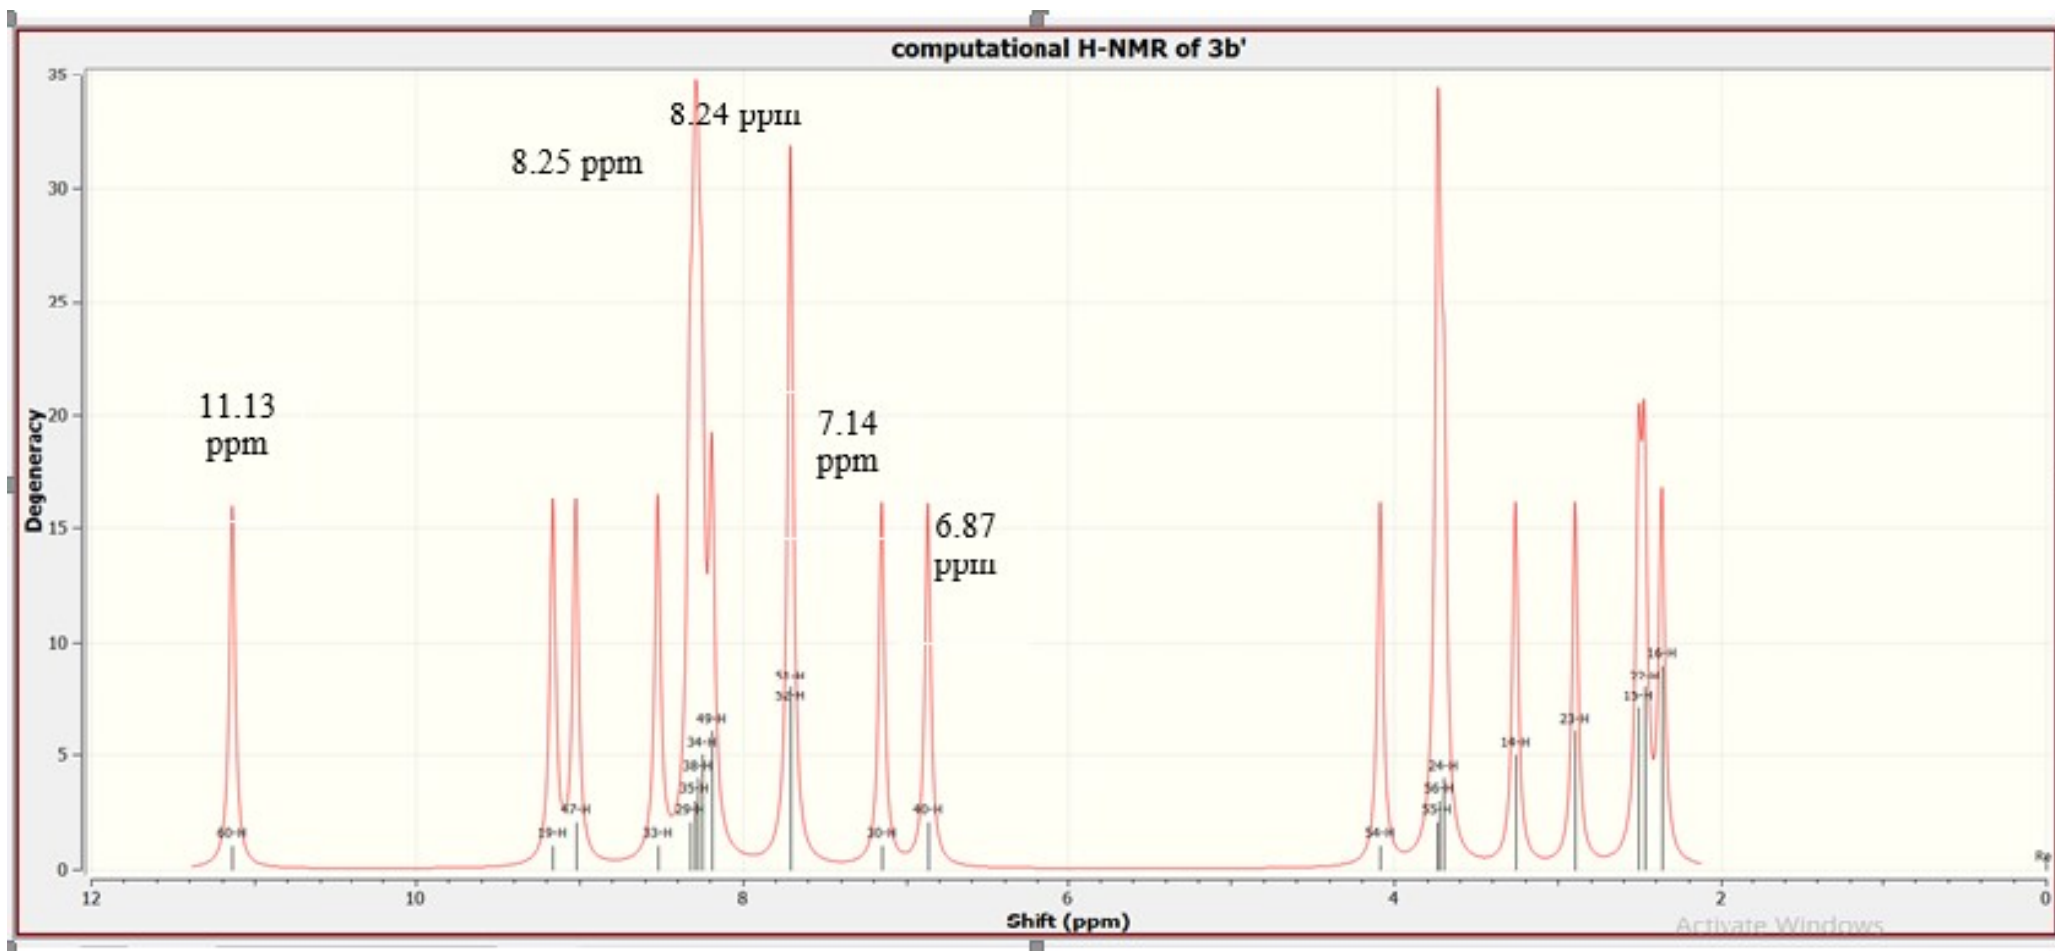

The computational  $^1\text{H}$  NMR data for **3b'** at M06-2X-D3/def2-TZVP level of theory

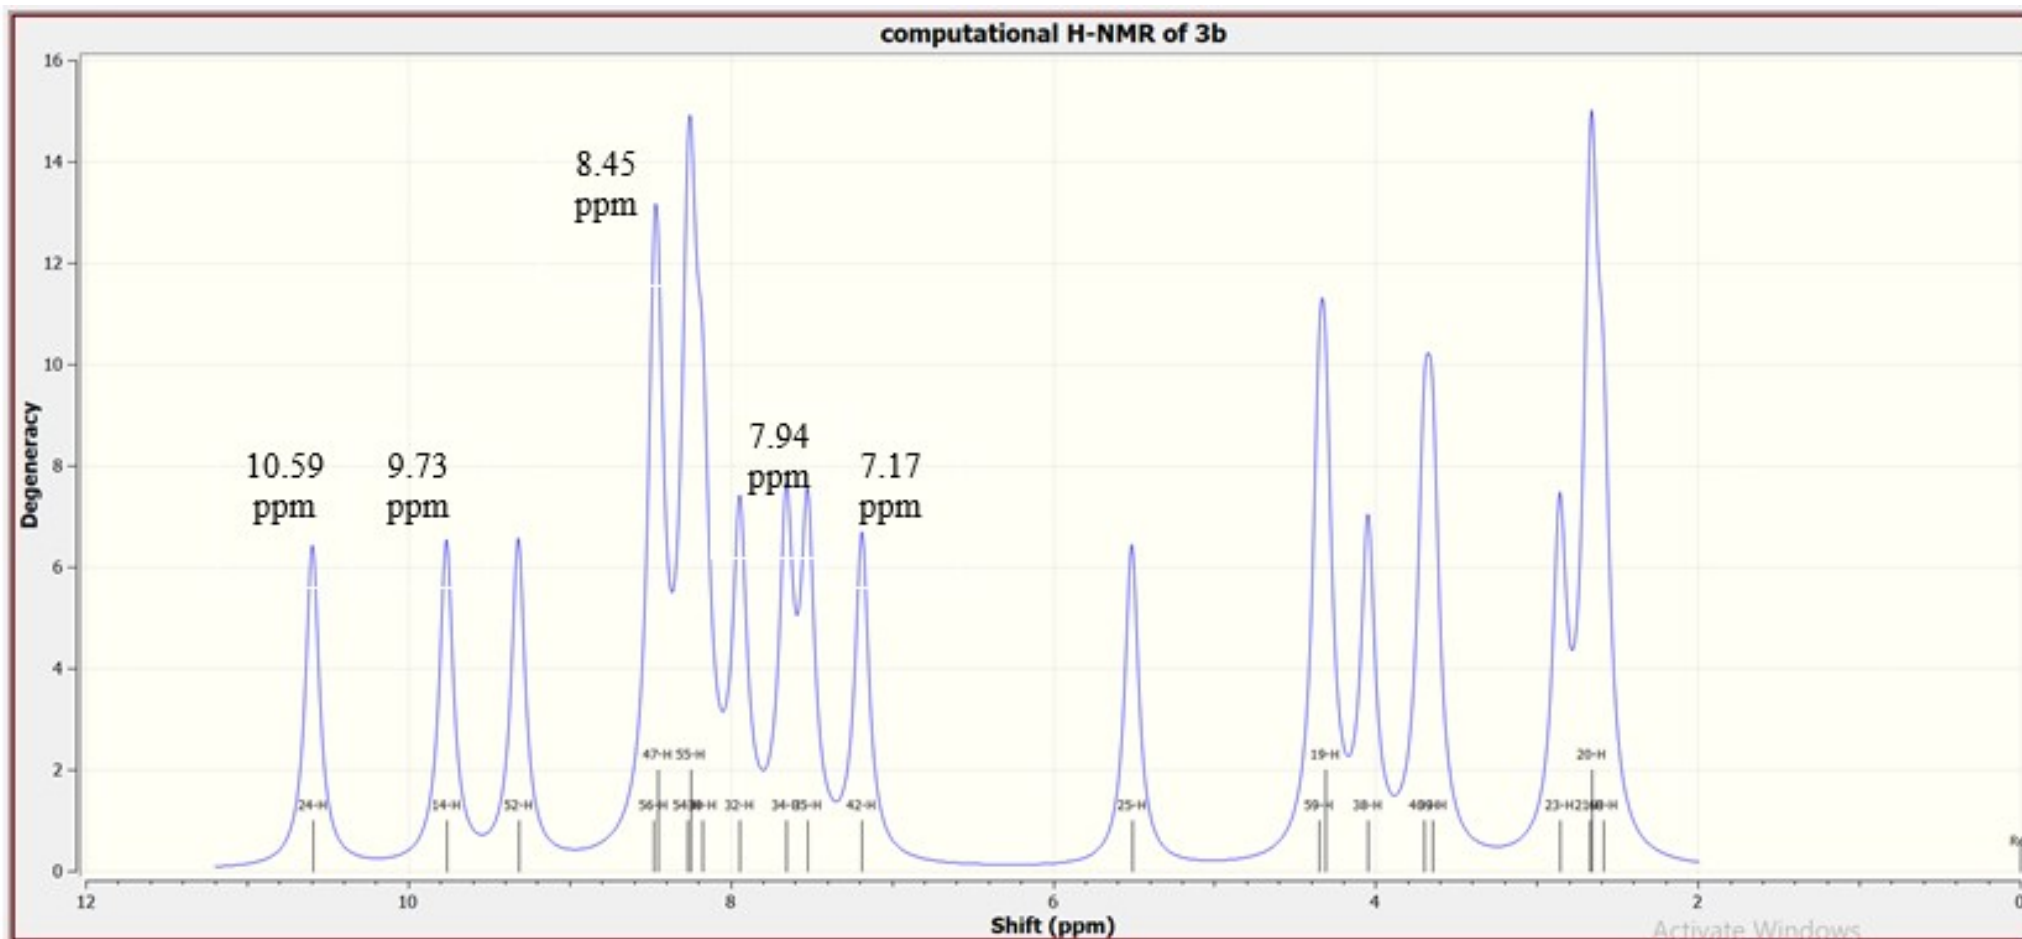

The computational  $^1\text{H}$  NMR data for **3b** at M06-2X-D3/def2-TZVP level of theory

**Table 4:** Thermodynamic parameters for reactants at b3lyp/6-31g (d) level of theory

| Compounds |       | G            | H            | S       | E            |
|-----------|-------|--------------|--------------|---------|--------------|
| <b>1</b>  |       | -1102.374169 | -1102.304271 | 147.112 | -1102.586084 |
| <b>1'</b> |       | -1561.979676 | -1561.906335 | 154.359 | -1562.179620 |
| <b>2</b>  | anion | -647.274438  | -647.218425  | 117.889 | -647.412226  |
| <b>3</b>  |       | -761.756975  | -761.693871  | 132.814 | -761.922542  |
| <b>4</b>  |       | -992.387009  | -992.333181  | 113.292 | -992.482974  |
| <b>5</b>  |       | -532.781723  | -532.731830  | 105.010 | -532.890226  |
| <b>2'</b> | net   | -647.779987  | -647.723403  | 119.093 | -647.929757  |
| <b>3'</b> |       | -762.262492  | -762.199154  | 133.306 | -762.440538  |
| <b>4'</b> |       | -992.889571  | -992.835214  | 114.404 | -992.997594  |
| <b>5'</b> |       | -533.286040  | -533.235476  | 106.421 | -533.406459  |

1,3-Dimethyl-5-[(4-oxo-4*H*-chromen-3-yl) methylene]-2,4,6(1*H*,3*H*,5*H*)-pyrimidinetrione (**1**)  
 Charge= 0 multiplicity= 1

O 0.89395700 0.83488400 -1.29435500  
 C 1.03872300 -1.14178100 0.04804400  
 O -0.45565500 1.15358500 1.15859100  
 C 1.56966000 0.08391200 -0.60293000  
 O -2.91196100 -2.57037400 -0.40165100  
 O -4.81722300 1.56573400 -0.08655200  
 O 3.23460600 -1.83336000 0.74667900  
 N -3.87089500 -0.51838000 -0.23984800  
 C -2.77534200 -1.37418800 -0.18218500  
 N -2.60495700 1.39363500 0.42203400  
 C -0.36843800 -1.51957500 -0.01290200  
 C -1.46539300 -0.73534600 0.11373700  
 C -2.61478500 2.81573200 0.78661200  
 H -3.04358500 3.39484700 -0.03210000

|   |             |             |             |
|---|-------------|-------------|-------------|
| H | -1.58456400 | 3.10936000  | 0.97433100  |
| H | -3.21887000 | 2.97634200  | 1.68400200  |
| C | 1.91210900  | -2.02048900 | 0.60973000  |
| C | 3.66043600  | 1.44864100  | -0.86704100 |
| H | 3.05189800  | 2.18140700  | -1.38674700 |
| C | -3.82791600 | 0.86060800  | 0.01388800  |
| C | -5.16074500 | -1.11633800 | -0.60493000 |
| H | -5.89607900 | -0.31736000 | -0.65593800 |
| H | -5.44963900 | -1.85687000 | 0.14494800  |
| H | -5.06965400 | -1.61967100 | -1.57002100 |
| C | 3.79427600  | -0.66659000 | 0.27393100  |
| C | 3.02142400  | 0.29025600  | -0.39422800 |
| C | -1.42366400 | 0.66174200  | 0.60181600  |
| C | 5.16493200  | -0.49942100 | 0.48126300  |
| H | 5.72276000  | -1.27004500 | 1.00297800  |
| H | -0.58682300 | -2.56644900 | -0.22154100 |
| C | 5.77123300  | 0.65751500  | 0.00801400  |
| C | 5.02036100  | 1.63404700  | -0.66711400 |
| H | 6.83634000  | 0.80340600  | 0.16323700  |
| H | 5.50718700  | 2.53325200  | -1.03254100 |
| H | 1.61098100  | -2.97109700 | 1.03816900  |

5-[(6-Chloro-4-oxo-4*H*-chromen-3-yl)methylene]-1,3-dimethyl-2,4,6(1*H*,3*H*,5*H*)-pyrimidinetrione  
(1')

Charge= 0 multiplicity= 1

|   |             |             |             |
|---|-------------|-------------|-------------|
| O | 0.50751100  | 0.61382800  | -1.11455200 |
| C | 0.30520300  | -1.49065300 | 0.01016600  |
| O | -0.89967300 | 0.85279300  | 1.32090200  |
| C | 1.03157300  | -0.29327800 | -0.48297900 |
| O | -3.77714200 | -2.27492500 | -0.74953500 |
| O | -5.10409700 | 2.02486500  | 0.01785800  |
| O | 2.34458400  | -2.55150300 | 0.72195600  |
| N | -4.44989200 | -0.14014900 | -0.36503200 |
| C | -3.48829400 | -1.14480700 | -0.38008000 |



|    |             |             |             |
|----|-------------|-------------|-------------|
| N  | -2.96302400 | 1.47975500  | 0.56605000  |
| C  | -1.13644400 | -1.65414800 | -0.15004200 |
| C  | -2.11770300 | -0.74014200 | 0.03403100  |
| C  | -2.79293000 | 2.83690900  | 1.10063300  |
| H  | -3.09604400 | 3.56264300  | 0.34503500  |
| H  | -1.74246500 | 2.95575500  | 1.35585400  |
| H  | -3.41264100 | 2.97702800  | 1.99062400  |
| C  | 1.01694300  | -2.53508000 | 0.51188900  |
| C  | 3.29293100  | 0.78348100  | -0.51985200 |
| H  | 2.82605800  | 1.64518000  | -0.98318000 |
| C  | -4.22817900 | 1.17865400  | 0.05918300  |
| C  | -5.79167300 | -0.49936300 | -0.84042100 |
| H  | -6.40625700 | 0.39682600  | -0.81278200 |
| H  | -6.21492400 | -1.27537100 | -0.19798600 |
| H  | -5.72552200 | -0.89104900 | -1.85786700 |
| C  | 3.08131900  | -1.43682700 | 0.39807300  |
| C  | 2.48614600  | -0.31812800 | -0.19443000 |
| C  | -1.90391900 | 0.57209000  | 0.68671000  |
| C  | 4.44982100  | -1.48210200 | 0.67421500  |
| H  | 4.87469700  | -2.36856100 | 1.13303300  |
| H  | -1.48563000 | -2.62685800 | -0.49486000 |
| C  | 5.23640000  | -0.38521600 | 0.35295700  |
| C  | 4.64939000  | 0.74245400  | -0.24350300 |
| H  | 6.30105600  | -0.39419600 | 0.55918900  |
| H  | 0.56641900  | -3.47102600 | 0.82553300  |
| Cl | 5.66427500  | 2.11699200  | -0.64365000 |

[1-(4-Methoxyphenyl)ethylidene]malononitrile (carbanion) (2)  
Charge=-1 multiplicity= 1

|   |             |             |             |
|---|-------------|-------------|-------------|
| O | -4.03029600 | -0.16459000 | 0.16244300  |
| N | 1.76295400  | 2.62430100  | 0.96785300  |
| N | 5.02789500  | 0.05434600  | -0.50328800 |
| C | 0.15320800  | -0.59405700 | -0.01523700 |
| C | 1.62877400  | -0.82129900 | -0.08968200 |

C -0.67908400 -1.48815700 0.68378600  
C -0.46832900 0.48406900 -0.65939700  
C -2.65676400 -0.24642100 0.06364100  
C -2.05942400 -1.32674200 0.72288100  
C -1.85404900 0.66287900 -0.63038400  
C 2.06560200 -2.09041100 -0.31159100  
C 2.51585100 0.33144500 0.04182700  
C -4.66347200 0.94051800 -0.44622100  
C 2.09821700 1.57620400 0.55563700  
C 3.88999700 0.19251100 -0.24895000  
H -0.21929600 -2.31688900 1.21433100  
H 0.14272000 1.19889200 -1.19957400  
H -2.69350500 -2.01790600 1.27175000  
H -2.28672600 1.51301400 -1.14710200  
H 1.36652100 -2.89460800 -0.51838900  
H 3.12501300 -2.32155600 -0.36546600  
H -5.73132100 0.83385400 -0.23641700  
H -4.51190900 0.95290800 -1.53555100  
H -4.30823900 1.89524500 -0.03294500

[2-(1-(2,3-Dimethoxyphenyl)ethylidene)]malononitrile (carbanion) (3)  
Charge= -1 multiplicity= 1

N -2.08972800 1.86375800 2.08815800  
N -4.98201500 -0.52717000 -0.24840200  
C -0.11575300 0.28117100 -0.56898800  
C -1.48800400 -0.30716800 -0.72335900  
C 0.99934500 -0.49495100 -0.21494500  
C 0.07907800 1.65249000 -0.81642900  
C 2.45492400 1.44885300 -0.40445500  
C 2.28188000 0.09244300 -0.12662900  
C 1.34121400 2.22450900 -0.74399700  
C -1.67335600 -1.25925700 -1.67093700  
C -2.54227000 0.23771700 0.13070100  
C -2.28526000 1.12410300 1.19648200  
C -3.87901500 -0.17041800 -0.06220000

|   |             |             |             |
|---|-------------|-------------|-------------|
| H | -0.78548700 | 2.25623800  | -1.07206100 |
| H | 1.47170300  | 3.28443700  | -0.94904600 |
| H | -0.84723600 | -1.60485400 | -2.28245600 |
| H | -2.65240900 | -1.69511700 | -1.84805300 |
| H | 3.43551100  | 1.90861000  | -0.34450100 |
| O | 0.92240800  | -1.84824100 | 0.02953900  |
| O | 3.29900100  | -0.75690800 | 0.24337000  |
| C | 4.59112400  | -0.20864500 | 0.36879200  |
| H | 5.24039200  | -1.03152400 | 0.67988800  |
| H | 4.96156100  | 0.19876000  | -0.58398800 |
| H | 4.63066000  | 0.58712000  | 1.12751600  |
| C | 0.24366100  | -2.20105500 | 1.23403800  |
| H | 0.78003200  | -1.81340700 | 2.11167800  |
| H | -0.78565300 | -1.82948000 | 1.24218600  |
| H | 0.23644800  | -3.29446000 | 1.26884300  |

[1-(2-Chlorophenyl) ethylidene] malononitrile (carbanion) (4)  
Charge= -1 multiplicity = 1

|   |             |             |             |
|---|-------------|-------------|-------------|
| N | 1.56746600  | 2.15701900  | -1.81532500 |
| N | 4.41703400  | -0.43734100 | 0.36723200  |
| C | -0.48291700 | 0.12198400  | 0.42218800  |
| C | 0.89492200  | -0.44855700 | 0.56981900  |
| C | -1.58145800 | -0.55794800 | -0.12801400 |
| C | -0.72913300 | 1.42790500  | 0.88635400  |
| C | -3.06305200 | 1.30174300  | 0.29364200  |
| C | -2.85524800 | 0.01388100  | -0.19244400 |
| C | -1.99009200 | 2.01312300  | 0.83337600  |
| C | 1.05465500  | -1.52323500 | 1.38126500  |
| C | 1.97485100  | 0.26604800  | -0.10178000 |
| C | 1.74525000  | 1.29198300  | -1.04067500 |
| C | 3.31338500  | -0.10790200 | 0.14017900  |
| H | 0.11150000  | 1.97903900  | 1.29561800  |
| H | -3.66975200 | -0.55346800 | -0.63150400 |
| H | -2.13325200 | 3.02369800  | 1.20786500  |

H 0.20825300 -1.97405200 1.88830100  
H 2.03534600 -1.95555900 1.55535000  
H -4.05449900 1.74541200 0.24057400  
Cl -1.41623900 -2.18217500 -0.81194200

1,1-Dicyano-2-phenylpropene (carbanion) (5)

Charge= -1 multiplicity = 1

N -1.27674800 2.61765000 -0.82728300  
N -4.20727400 -0.46141900 0.34401900  
C 0.72559200 -0.40519100 0.05542200  
C -0.70707200 -0.83380200 0.04820400  
C 1.68944100 -1.12461800 -0.67198400  
C 1.16484500 0.69547900 0.81122300  
C 3.46012600 0.31434500 0.13362000  
C 3.03923900 -0.77469500 -0.63190100  
C 2.51347600 1.04743400 0.85294400  
C -0.96899900 -2.16194800 0.18443700  
C -1.73908400 0.19271300 -0.06095500  
C -1.47810800 1.51139100 -0.48670800  
C -3.09091800 -0.15141700 0.15388000  
H 1.35877700 -1.96054000 -1.28179700  
H 0.43699200 1.27205800 1.37189200  
H 3.76236100 -1.34812400 -1.20923100  
H 2.82578700 1.90173000 1.45010600  
H -0.17108300 -2.87254200 0.37499500  
H -1.98714000 -2.53897800 0.18590700  
H 4.51122500 0.59463400 0.16188500

[1-(4-Methoxyphenyl) ethylidene]malononitrile (neutral diene) (2')

Charge= 0 multiplicity= 1

O -4.03068200 -0.13189300 0.21543200  
N 1.74795600 2.60046200 0.79189700  
N 5.02397600 0.02156300 -0.48515000  
C 0.11572000 -0.63247100 -0.03692200  
C 1.58019100 -0.88120200 -0.12272300  
C -0.70380200 -1.47257900 0.74027000

|   |             |             |             |
|---|-------------|-------------|-------------|
| C | -0.50068400 | 0.40942600  | -0.74242500 |
| C | -2.67810300 | -0.23751600 | 0.08616400  |
| C | -2.07650500 | -1.28327800 | 0.80295300  |
| C | -1.88099200 | 0.61171100  | -0.69044800 |
| C | 2.08089600  | -2.11319400 | -0.32016600 |
| C | 2.49423700  | 0.28429300  | 0.03021400  |
| C | -4.69592100 | 0.90599800  | -0.48874600 |
| C | 2.10428400  | 1.47109600  | 0.50856100  |
| C | 3.89030400  | 0.15311400  | -0.25383700 |
| H | -0.24748800 | -2.27475000 | 1.31308200  |
| H | 0.09760000  | 1.06616700  | -1.36726100 |
| H | -2.70669700 | -1.92708900 | 1.40850200  |
| H | -2.31825100 | 1.42310700  | -1.26071600 |
| H | 1.41909000  | -2.95844600 | -0.47553200 |
| H | 3.14873400  | -2.30425000 | -0.35313900 |
| H | -5.75425900 | 0.80256000  | -0.24323100 |
| H | -4.56383400 | 0.80581200  | -1.57397600 |
| H | -4.34523500 | 1.89715500  | -0.17238800 |
| H | 1.73452000  | 2.87832400  | 1.77660100  |

[2-(1-(2,3-Dimethoxyphenyl) ethylidene)]malononitrile (neutral diene) (**3'**)

Charge=0 multiplicity= 1

|   |             |             |             |
|---|-------------|-------------|-------------|
| N | -2.40172100 | 2.10634700  | -1.69359600 |
| N | -5.00319000 | -0.78997900 | 0.24685600  |
| C | -0.14317000 | 0.21277200  | 0.56233000  |
| C | -1.46315300 | -0.47823500 | 0.65269700  |
| C | 1.02455800  | -0.48634600 | 0.21362000  |
| C | -0.05047000 | 1.58884800  | 0.84767600  |
| C | 2.33231300  | 1.55628900  | 0.42683000  |
| C | 2.26495000  | 0.19064400  | 0.14526600  |
| C | 1.16970500  | 2.24701300  | 0.78012700  |
| C | -1.64717400 | -1.59638600 | 1.37203700  |
| C | -2.60263500 | 0.13951300  | -0.08261800 |
| C | -2.46867000 | 1.11753400  | -0.98498000 |
| C | -3.93107700 | -0.36217900 | 0.09297200  |

|   |             |             |             |
|---|-------------|-------------|-------------|
| H | -0.94331200 | 2.13223600  | 1.14011600  |
| H | 1.22789000  | 3.30680500  | 1.01093000  |
| H | -0.82300500 | -2.04877800 | 1.90952800  |
| H | -2.61581600 | -2.08248200 | 1.43700300  |
| H | -2.23886600 | 1.97957600  | -2.69595800 |
| H | 3.27872300  | 2.08289500  | 0.38324500  |
| O | 0.98830100  | -1.84137600 | -0.00510000 |
| O | 3.33529400  | -0.58354200 | -0.19979400 |
| C | 1.09049100  | -2.24845700 | -1.37108000 |
| H | 0.25465300  | -1.84965400 | -1.96124500 |
| H | 2.04032700  | -1.92891200 | -1.81193700 |
| H | 1.03859500  | -3.33942700 | -1.36647000 |
| C | 4.61639600  | 0.02569100  | -0.24020300 |
| H | 5.31475100  | -0.76800000 | -0.51130000 |
| H | 4.66273800  | 0.82319200  | -0.99376000 |
| H | 4.89655600  | 0.43710000  | 0.73813700  |

[1-(2-Chlorophenyl)ethylidene]malononitrile (neutral diene) (4')  
Charge= 0 multiplicity= 1

|   |             |             |             |
|---|-------------|-------------|-------------|
| N | 1.16446200  | -0.98819600 | -2.48631700 |
| N | 4.33120500  | 0.32942800  | 0.25525500  |
| C | -0.63644700 | 0.61370300  | 0.25151800  |
| C | 0.80584900  | 0.76887900  | 0.61429600  |
| C | -1.33233000 | -0.60098700 | 0.36886700  |
| C | -1.34993300 | 1.72713200  | -0.22018600 |
| C | -3.36170100 | 0.41638700  | -0.44522200 |
| C | -2.68040000 | -0.70515100 | 0.02574700  |
| C | -2.69721000 | 1.63697400  | -0.56558500 |
| C | 1.17503800  | 1.44584800  | 1.71142900  |
| C | 1.80587200  | 0.19083700  | -0.31900000 |
| C | 1.46888800  | -0.35913800 | -1.49076000 |
| C | 3.20107700  | 0.25357600  | -0.01488400 |
| H | -0.82397800 | 2.67301000  | -0.31207700 |
| H | -3.18636200 | -1.65821200 | 0.13689200  |

|    |             |             |             |
|----|-------------|-------------|-------------|
| H  | -3.22376200 | 2.51581800  | -0.92610600 |
| H  | 0.42875000  | 1.85386000  | 2.38460100  |
| H  | 2.21868100  | 1.59139400  | 1.97308600  |
| H  | 1.07937000  | -0.49498300 | -3.37867600 |
| H  | -4.41154700 | 0.33227300  | -0.71130100 |
| Cl | -0.52606100 | -2.03118500 | 0.99727700  |

1,1-Dicyano-2-phenylpropene (neutral diene) (**5'**)

Charge= 0 multiplicity= 1

|   |             |             |             |
|---|-------------|-------------|-------------|
| N | -1.25165700 | 2.59209000  | -0.62316500 |
| N | -4.20866100 | -0.48320500 | 0.28562400  |
| C | 0.76093900  | -0.44986400 | 0.08212900  |
| C | -0.66234300 | -0.89144400 | 0.08602900  |
| C | 1.70045700  | -1.11485400 | -0.72212700 |
| C | 1.20116800  | 0.60935000  | 0.89299500  |
| C | 3.46923900  | 0.31367200  | 0.10249000  |
| C | 3.04285500  | -0.73802400 | -0.71056800 |
| C | 2.54410400  | 0.98479500  | 0.90417800  |
| C | -0.99712400 | -2.18746900 | 0.20597300  |
| C | -1.71540900 | 0.15069300  | -0.05369400 |
| C | -1.46581100 | 1.40916800  | -0.43313400 |
| C | -3.09342500 | -0.18457600 | 0.13395000  |
| H | 1.36636300  | -1.92146400 | -1.36840600 |
| H | 0.49451900  | 1.12620400  | 1.53578800  |
| H | 3.75439000  | -1.26202200 | -1.34315200 |
| H | 2.86801300  | 1.79977400  | 1.54578100  |
| H | -0.23198300 | -2.94295700 | 0.34834900  |
| H | -2.02983800 | -2.52095400 | 0.18956600  |
| H | -1.22188900 | 2.94096300  | -1.58449400 |
| H | 4.51475500  | 0.60958500  | 0.11003400  |

**Table 5:** Thermodynamic parameters for TS<sub>1</sub> at b3lyp/6-31g (d) level of theory

| Compound TS <sub>1</sub> | G            | H            | S       | E            |
|--------------------------|--------------|--------------|---------|--------------|
| TS <sub>1a</sub>         | -1635.144298 | -1635.046189 | 206.487 | -1635.487433 |
| TS <sub>1b</sub>         | -1749.637807 | -1749.533802 | 218.898 | -1750.010414 |
| TS <sub>1c</sub>         | -1864.120309 | -1864.008539 | 235.239 | -1864.520068 |
| TS <sub>1d</sub>         | -2094.752884 | -2094.651395 | 213.600 | -2095.084163 |
| TS <sub>1e</sub>         | -2554.362292 | -2554.257272 | 221.034 | -2554.681712 |
| TS <sub>1f</sub>         | -2094.753532 | -2094.651853 | 214.002 | -2095.084771 |
| TS <sub>1h</sub>         | -2209.246547 | -2209.139048 | 226.252 | -2209.607148 |
| TS <sub>1i</sub>         | -2323.729317 | -2323.613815 | 243.094 | -2324.116839 |

TS<sub>1a</sub>

Imaginary Freq = -201.84

Charge= -1 multiplicity= 1

C 3.02790600 -2.74804300 -2.30635400  
C 1.70860000 -3.37964600 -0.38232700  
O -0.67916700 -1.59479000 1.57438400  
C 0.02733500 -1.83832700 0.59315700  
O 1.64317200 -0.38982800 -2.36234200  
O 2.32297500 -4.44399000 -0.35976500  
H 3.98890600 -2.84435000 -1.79194700  
N 1.97105100 -2.42182100 -1.35243400  
C 1.31089000 -1.17185300 -1.46757200  
N 0.73344700 -3.05985900 0.55507800  
H 3.06651700 -1.93329800 -3.02672300  
C 0.23888000 -0.93952300 -0.51935300  
C 0.48454700 -3.99998300 1.64429000  
H 0.97684100 -4.93763800 1.39439100  
H -0.59239300 -4.13900200 1.75805900



H 0.87902100 -3.60861800 2.58808000  
H 2.80718400 -3.69684200 -2.80228800  
C -5.25232300 -1.33154500 0.11012900  
H -4.93200000 -2.36745700 0.06413000  
C -1.91571700 0.42851900 -0.37392400  
O -2.56208600 -1.88923800 -0.57764500  
C -2.44823900 1.68309600 -0.37753700  
C -0.46338100 0.27104400 -0.62760300  
O -3.75734000 1.99851200 -0.23118300  
C -4.66311800 0.99573800 -0.03538100  
C -4.27018000 -0.34479900 -0.07877700  
C -2.85648000 -0.72059900 -0.34903400  
C -5.99205700 1.37055800 0.19303100  
H -6.24703300 2.42531500 0.21547400  
H -0.06853000 0.92685300 -1.39830600  
C -6.94168500 0.37631600 0.38459700  
C -6.57333500 -0.97958500 0.34446700  
H -7.97706900 0.65310000 0.56606300  
H -7.32511200 -1.74950200 0.49580000  
H -1.86166500 2.58832100 -0.49676100  
C 0.46826000 4.12796100 -0.27895200  
C 0.37642700 1.61736500 1.09644200  
H 0.36717100 0.73373700 1.72210400  
N -0.55513600 4.65584800 -0.49424000  
C 1.58349800 2.15215200 0.64954500  
C 1.66278900 3.41982200 -0.00313000  
H -0.48154100 2.27145900 1.19153500  
C 2.82351600 1.34404300 0.82660100  
C 3.71221800 1.11526300 -0.23677400  
C 3.11181600 0.76707000 2.07476300  
C 4.85395800 0.33674900 -0.05221400  
H 3.48373900 1.51629300 -1.21734200  
C 4.25843400 -0.00414700 2.26062400  
H 2.43427500 0.94125300 2.90549700  
C 5.13479200 -0.22193500 1.19621500

H 5.52254400 0.16166300 -0.89125700  
H 4.46556600 -0.43588000 3.23696300  
C 2.87517800 4.05875200 -0.36505400  
N 3.85512100 4.62164600 -0.66798400  
H 6.02658800 -0.82821100 1.33674700

TS<sub>1b</sub>

Charge = -1 multiplicity = 1

Imaginary Freq = -187.83

C -2.70334500 -2.46554800 2.48987000  
C -1.49060800 -3.20550700 0.53495300  
O 0.94577100 -1.60644000 -1.51936700  
C 0.25470400 -1.78908500 -0.51484200  
O -1.18024000 -0.19524700 2.46033800  
O -2.17007700 -4.22960700 0.55108300  
H -3.68591400 -2.51351700 2.00990700  
N -1.66302000 -2.21784400 1.49577700  
C -0.92324800 -1.00987000 1.57011800  
N -0.52846600 -2.96102800 -0.43727700  
H -2.66919500 -1.63874400 3.19665800  
C 0.13517000 -0.86212700 0.58938800  
C -0.37493900 -3.92917900 -1.51982700  
H -0.92607100 -4.82631800 -1.24534200  
H 0.68607800 -4.14651400 -1.65846000  
H -0.76464800 -3.52064000 -2.45810400  
H -2.52263200 -3.41810700 2.99476600  
C 5.57155200 -1.60541500 -0.21899100  
H 5.18981100 -2.61921300 -0.15310800  
C 2.36851600 0.36110600 0.36045900  
O 2.87688300 -1.99008800 0.56698100  
C 2.97703300 1.58080600 0.33650000  
C 0.92013000 0.29750700 0.66266500  
O 4.29724900 1.81315200 0.14387800  
C 5.13216500 0.75483400 -0.07399000  
C 4.65908500 -0.55859000 -0.00571300

C 3.23510400 -0.84405200 0.31573900  
C 6.47306100 1.04514100 -0.35038100  
H 6.79164600 2.08192400 -0.39054500  
H 0.58835800 0.99340500 1.42777700  
C 7.35251700 -0.00719100 -0.56527400  
C 6.90293600 -1.33741700 -0.50092200  
H 8.39615900 0.20381500 -0.78402000  
H 7.60022900 -2.15334600 -0.67089700  
H 2.45106300 2.52094900 0.46873200  
C 0.19940900 4.18294600 0.33150300  
C 0.11281200 1.69104100 -1.07540900  
H 0.06131700 0.80033100 -1.68897500  
N 1.25777000 4.64425400 0.53162900  
C -1.05019100 2.28619400 -0.59381200  
C -1.04045100 3.55218300 0.07113700  
H 1.00530900 2.29406000 -1.18864500  
C -2.33531400 1.55099000 -0.74292000  
C -3.21669400 1.37134300 0.33139900  
C -2.69003900 0.98528900 -1.98204700  
C -4.40914700 0.66067100 0.18515400  
H -2.95093200 1.75658100 1.30888600  
C -3.87852900 0.28675200 -2.14578500  
H -2.02516800 1.11364200 -2.83104000  
C -4.74824300 0.12071100 -1.05987900  
H -5.05454300 0.53351500 1.04683700  
H -4.15483700 -0.14052000 -3.10508900  
C -6.78516100 -0.81624500 -0.24166200  
H -7.61376100 -1.39598700 -0.65529500  
H -6.30733700 -1.39280500 0.56221600  
H -7.17395200 0.12257900 0.17644600  
O -5.89596800 -0.58341600 -1.31763400  
C -2.20586800 4.25696500 0.46203800  
N -3.14691800 4.87069700 0.78962300

TS<sub>1c</sub>

Imaginary Freq = -171.68

Charge= -1 multiplicity= 1

C 1.34345400 3.88699400 2.54342400  
C 0.37950800 3.92792000 0.32583300  
O -1.23923700 1.41895800 -1.64062800  
C -0.77823500 1.95167600 -0.62999900  
O 0.42136800 1.32103300 2.78470600  
O 0.78425400 5.08168400 0.20374000  
H 2.36059000 4.11049600 2.20623300  
N 0.59633600 3.20404600 1.49128200  
C 0.15441100 1.87753600 1.71350000  
N -0.29623100 3.28206800 -0.69712600  
H 1.36885100 3.21724500 3.40085300  
C -0.63263500 1.29002400 0.64906500  
C -0.45545600 4.02963700 -1.94097800  
H -0.99850800 4.95956100 -1.75220300  
H -1.00982600 3.39023900 -2.62527400  
H 0.52133700 4.28270500 -2.36475100  
H 0.85420300 4.83020100 2.80037500  
C -5.90088800 0.60570200 -0.86118900  
H -5.75411000 1.67838800 -0.93602000  
C -2.47586000 -0.45702700 0.40950500  
O -3.49287200 1.71625100 0.12860700  
C -2.80571100 -1.77347400 0.53484500  
C -1.13747400 -0.00376500 0.85965300  
O -4.00485500 -2.33089900 0.24212300  
C -5.00213700 -1.54002900 -0.25076700  
C -4.83053700 -0.15798300 -0.36599700  
C -3.56084500 0.49375900 0.05227000  
C -6.19685100 -2.17074800 -0.61640200  
H -6.28094100 -3.24722600 -0.50634500  
H -0.80036800 -0.45116100 1.79001200  
C -7.23630800 -1.39451500 -1.11020700  
C -7.09036200 -0.00201400 -1.23484200  
H -8.16879300 -1.87139400 -1.40112800  
H -7.91073300 0.59572600 -1.62284900

H -2.12289600 -2.53883600 0.88781700  
C 0.28153800 -3.79973900 1.24256000  
C 0.22474500 -1.43594500 -0.44274800  
H 0.29873600 -0.66230900 -1.19631600  
N -0.70424900 -4.42105500 1.36070800  
C 1.36372200 -1.82535000 0.25528200  
C 1.43066900 -2.99061000 1.07217700  
H -0.56144800 -2.16488500 -0.59572000  
C 2.59140400 -0.96843000 0.17921100  
C 3.41175300 -1.02198200 -0.95450100  
C 2.93136000 -0.10364200 1.23286000  
C 4.56170000 -0.20803400 -1.04003400  
C 4.06184100 0.69940700 1.14009300  
H 2.28662700 -0.04594200 2.10259700  
C 4.88251800 0.65482600 0.00889200  
H 4.31296600 1.37364000 1.95453900  
C 2.61979000 -3.41800600 1.71580800  
N 3.59279500 -3.80719400 2.23614200  
H 5.76038000 1.28940000 -0.04478900  
O 3.08451800 -1.84545500 -2.00807700  
O 5.29565600 -0.33988700 -2.19316400  
C 6.44081000 0.47484700 -2.33889700  
H 6.86397300 0.22778800 -3.31552700  
H 6.18570300 1.54362400 -2.31648300  
H 7.18970000 0.27302200 -1.55961900  
C 3.83324900 -3.06051900 -2.06451200  
H 4.89347000 -2.86385500 -2.26519300  
H 3.73610700 -3.62745200 -1.13073800  
H 3.40873000 -3.64061400 -2.88839400

TS<sub>1d</sub>

Imaginary Freq = -194.06

Charge = -1 multiplicity = 1

C 3.23255100 -2.98885500 -2.28290800  
C 1.79792400 -3.47736200 -0.39957700

O -0.43026100 -1.44635800 1.50578300  
C 0.27466800 -1.76270100 0.54430300  
O 2.12434600 -0.48818300 -2.35459700  
O 2.28746100 -4.60390000 -0.36943700  
H 4.16219000 -3.19533300 -1.74407300  
N 2.19378800 -2.54985200 -1.35421800  
C 1.68360400 -1.23310200 -1.47566200  
N 0.83814500 -3.05533600 0.51372000  
H 3.38223800 -2.18031500 -2.99565500  
C 0.62050200 -0.88484300 -0.55177600  
C 0.45270200 -3.96919100 1.58589900  
H 0.84268100 -4.95480700 1.34022500  
H -0.63586200 -3.98612500 1.66775000  
H 0.86141200 -3.63176400 2.54425900  
H 2.91931900 -3.90414100 -2.79167200  
C -4.88235300 -0.63020300 -0.04456600  
H -4.69513300 -1.69633900 -0.10460400  
C -1.35731100 0.72919700 -0.43298600  
O -2.27650000 -1.48991600 -0.69319300  
C -1.73452900 2.03890100 -0.42346000  
C 0.06997800 0.40012700 -0.66207500  
O -3.00032200 2.50747000 -0.29469600  
C -4.02104100 1.61934500 -0.13413300  
C -3.79240300 0.24250300 -0.19423600  
C -2.42796900 -0.29877000 -0.44735000  
C -5.30168200 2.14352500 0.07650600  
H -5.43577000 3.21962900 0.11494900  
H 0.55773100 1.01315900 -1.41450500  
C -6.36991600 1.27295600 0.23186100  
C -6.14690000 -0.11169100 0.16995300  
H -7.37175900 1.65357500 0.39940900  
H -1.04216800 2.86930800 -0.51586500  
C 1.42440100 4.12293700 -0.23255400  
C 1.02860600 1.62505700 1.10610700  
H 0.90725300 0.73774800 1.71439600

|    |             |             |             |
|----|-------------|-------------|-------------|
| N  | 0.46756700  | 4.76036300  | -0.45764200 |
| C  | 2.29556300  | 2.02441800  | 0.68518200  |
| C  | 2.52814700  | 3.28401400  | 0.05334300  |
| H  | 0.24854600  | 2.37071100  | 1.19883900  |
| C  | 3.43251100  | 1.07780800  | 0.86739100  |
| C  | 4.31038900  | 0.76971500  | -0.18488400 |
| C  | 3.62884300  | 0.44810400  | 2.10797600  |
| C  | 5.35215200  | -0.13755200 | 0.00277600  |
| H  | 4.14923200  | 1.21348100  | -1.16040000 |
| C  | 4.67603400  | -0.45281900 | 2.29706700  |
| H  | 2.95994700  | 0.68303100  | 2.93071900  |
| C  | 5.54252600  | -0.74895800 | 1.24355000  |
| H  | 6.01303400  | -0.37142800 | -0.82796400 |
| H  | 4.81351800  | -0.92391600 | 3.26743800  |
| C  | 3.81049100  | 3.78861900  | -0.27832200 |
| N  | 4.85234400  | 4.24251700  | -0.55626600 |
| H  | 6.35643400  | -1.45581400 | 1.38658200  |
| Cl | -7.52108700 | -1.20144000 | 0.36797600  |

TS<sub>1e</sub>

Imaginary Freq = -143.93

Charge = -1 multiplicity = 1

|   |            |             |             |
|---|------------|-------------|-------------|
| C | 5.79075900 | 0.12175200  | -2.16031100 |
| C | 5.31409200 | -1.51494600 | -0.44638900 |
| O | 2.40814400 | -2.22111200 | 1.49915400  |
| C | 3.06023900 | -1.67474500 | 0.60571200  |
| O | 3.18923100 | 0.93303000  | -1.96495700 |
| O | 6.48184900 | -1.88634200 | -0.53177600 |
| H | 6.62786100 | 0.54858200  | -1.60059700 |
| N | 4.82887200 | -0.48957400 | -1.24493000 |
| C | 3.49797600 | -0.00712500 | -1.22906800 |
| N | 4.41045600 | -2.07299500 | 0.44945200  |
| H | 5.26008900 | 0.89889100  | -2.70643400 |
| C | 2.57335800 | -0.67504800 | -0.32263600 |
| C | 4.88981000 | -3.11869100 | 1.35236800  |

H 5.93052100 -3.31696300 1.10552300  
H 4.28541600 -4.02128400 1.22984800  
H 4.79592700 -2.78883700 2.39059700  
H 6.18806400 -0.63012000 -2.84774700  
C -3.23907700 -2.33317400 -1.29235600  
H -3.14911800 -2.08470800 -2.34385000  
C 0.03007400 -0.96250500 0.05962100  
O -0.88524000 -0.98173600 -2.14985700  
C -0.19746600 -1.30395300 1.35678700  
C 1.23010300 -0.26842000 -0.42794700  
O -1.30622700 -1.93606600 1.80591700  
C -2.29219000 -2.27302500 0.92740000  
C -2.19275600 -1.96277900 -0.43251600  
C -0.99611800 -1.25846800 -0.95568200  
C -3.40861400 -2.93989800 1.44487300  
H -3.45172600 -3.15684600 2.50703800  
H 1.03134900 0.29235800 -1.33395200  
C -4.43680100 -3.30248100 0.58777400  
C -4.33977200 -2.99483200 -0.77853300  
H -5.31301000 -3.81821900 0.96574600  
H 0.47603400 -1.09252600 2.17226900  
C -0.08014900 1.47920600 3.28618800  
C 1.29201600 1.77939600 0.73619800  
H 1.88036000 2.10896500 -0.11133700  
N 0.38578000 0.82677500 4.13863900  
C 0.07669400 2.40096800 1.00384900  
C -0.62207300 2.26508200 2.23666600  
H 1.82430400 1.29796400 1.54903500  
C -0.47507400 3.32528200 -0.03976200  
C -1.69239400 3.15611300 -0.72005600  
C 0.29003500 4.45497500 -0.38071200  
C -2.12677300 4.06887900 -1.68338000  
C -0.13218100 5.37543800 -1.33572600  
C -1.34878700 5.18226400 -1.98965300  
H -3.07030900 3.89301400 -2.18902800



H 0.48705300 6.23801400 -1.56680200  
C -1.80414200 2.98647100 2.54406100  
N -2.76746500 3.58446800 2.83017700  
H -1.69365100 5.88968700 -2.73936100  
Cl -5.65884900 -3.47016400 -1.85120500  
H 1.23435400 4.60082500 0.13471300  
Cl -2.71843400 1.75862700 -0.42982500

TS<sub>1f</sub>

Imaginary Freq = -153.31

Charge = -1 multiplicity = 1

C -5.27617000 -2.10599600 -1.56452600  
C -5.28383800 -0.12463800 -0.18047900  
O -2.68010300 1.82469400 1.28444400  
C -3.15881300 0.94767800 0.56076000  
O -2.54846900 -1.97121900 -1.56657500  
O -6.51148900 -0.17780800 -0.17949200  
H -5.88026700 -2.67510500 -0.85212000  
N -4.52746500 -1.05958300 -0.87139300  
C -3.11274400 -1.06749900 -0.94495900  
N -4.57187300 0.84843200 0.50899500  
H -4.54594400 -2.75151900 -2.04820700  
C -2.41866900 0.01710200 -0.26526100  
C -5.32228200 1.82192300 1.30077200  
H -6.38140400 1.62514200 1.14922800  
H -5.06818900 2.83588300 0.98094300  
H -5.06023300 1.72716200 2.35817100  
H -5.94887800 -1.66268300 -2.30403300  
C 2.40282300 3.27932100 -2.19247100  
H 2.33237000 2.81531100 -3.17117800  
C -0.11083800 1.19227700 -0.25218900  
O 0.59174600 1.09330800 -2.53497200  
C 0.06908500 1.82824400 0.93693000  
C -1.02566600 0.06385100 -0.47338000  
O 0.91757600 2.86078400 1.13967200

|    |             |             |             |
|----|-------------|-------------|-------------|
| C  | 1.67140300  | 3.33008000  | 0.10201600  |
| C  | 1.59678800  | 2.75207300  | -1.16995000 |
| C  | 0.68287800  | 1.61318300  | -1.42193100 |
| C  | 2.52087100  | 4.40920200  | 0.37073400  |
| H  | 2.54884500  | 4.82101500  | 1.37437500  |
| H  | -0.70775400 | -0.55137800 | -1.30729400 |
| C  | 3.30693300  | 4.91252600  | -0.65675700 |
| C  | 3.25011300  | 4.34857900  | -1.94313200 |
| H  | 3.97322300  | 5.74839500  | -0.45950900 |
| H  | -0.43621800 | 1.56479400  | 1.85272400  |
| C  | 1.08133800  | -0.45943800 | 3.24714400  |
| C  | -0.30716400 | -1.63543000 | 0.97226400  |
| H  | -0.81352500 | -2.28857600 | 0.27216900  |
| N  | 0.49376300  | 0.15008100  | 4.05490600  |
| C  | 1.06391300  | -1.77890600 | 1.16303300  |
| C  | 1.77099800  | -1.20677700 | 2.25756900  |
| H  | -0.90442500 | -1.21049300 | 1.77139700  |
| C  | 1.81051700  | -2.65444400 | 0.20167600  |
| C  | 2.84177800  | -2.23420500 | -0.65476600 |
| C  | 1.44684100  | -4.01145300 | 0.13829300  |
| C  | 3.48088700  | -3.12248800 | -1.52231900 |
| C  | 2.07793200  | -4.90892000 | -0.71836400 |
| C  | 3.10254800  | -4.46211000 | -1.55239200 |
| H  | 4.26681000  | -2.75150000 | -2.17165600 |
| H  | 1.76956300  | -5.95085900 | -0.73332900 |
| C  | 3.14740900  | -1.44586500 | 2.50383300  |
| N  | 4.27516600  | -1.64455800 | 2.74106600  |
| H  | 3.60554000  | -5.14819500 | -2.22903300 |
| H  | 0.65060800  | -4.35285600 | 0.79262100  |
| Cl | 3.35488300  | -0.55474200 | -0.71585000 |
| H  | 3.87242100  | 4.75017000  | -2.73833400 |

TS<sub>h1</sub>

Imaginary Freq = -179.59

Charge = -1 multiplicity = 1

C -2.96275700 -2.61675800 2.47955100  
C -1.61074300 -3.24949600 0.57863400  
O 0.70827600 -1.42671500 -1.42550200  
C 0.00479000 -1.66858600 -0.44228600  
O -1.69244000 -0.19465200 2.45654400  
O -2.17507100 -4.34077900 0.59236800  
H -3.91565800 -2.78399300 1.96789300  
N -1.92192400 -2.27185800 1.51498100  
C -1.32116400 -0.99019800 1.59022500  
N -0.64782400 -2.91694300 -0.36709400  
H -3.04652400 -1.77843000 3.16833600  
C -0.25389000 -0.74155700 0.63854600  
C -0.35277900 -3.88045000 -1.42464600  
H -0.81447000 -4.82699800 -1.15133100  
H 0.72962400 -3.98508600 -1.52266100  
H -0.74997600 -3.53096300 -2.38331100  
H -2.69446000 -3.53317900 3.01160000  
C 5.24048300 -0.88349500 -0.02162900  
H 4.98263600 -1.93286600 0.06577200  
C 1.83019300 0.72343600 0.43691200  
O 2.60198300 -1.54780800 0.72179200  
C 2.29568200 2.00402400 0.39168100  
C 0.39212500 0.49926700 0.71024900  
O 3.58631800 2.38099300 0.21826400  
C 4.53836700 1.42151700 0.04620600  
C 4.21784100 0.06504900 0.14109700  
C 2.82776300 -0.37543400 0.44430900  
C 5.84498600 1.85192400 -0.21192600  
H 6.05128900 2.91529400 -0.27630900  
H -0.03657400 1.16722200 1.45162500  
C 6.84593000 0.90690400 -0.37997100  
C 6.53054000 -0.45763100 -0.28304600  
H 7.86599200 1.21420900 -0.58409800  
H 1.66440900 2.88145700 0.48839600  
C -0.73048900 4.27838800 0.27695300

|    |             |             |             |
|----|-------------|-------------|-------------|
| C  | -0.52825300 | 1.76989000  | -1.08286000 |
| H  | -0.47237900 | 0.86539400  | -1.67536400 |
| N  | 0.27205500  | 4.84759900  | 0.48683000  |
| C  | -1.75648500 | 2.24590900  | -0.63252000 |
| C  | -1.89286000 | 3.51813100  | 0.00656700  |
| H  | 0.29733800  | 2.46197300  | -1.19469000 |
| C  | -2.95340300 | 1.37574000  | -0.78853900 |
| C  | -3.83452800 | 1.12797200  | 0.27239100  |
| C  | -3.21905900 | 0.74796900  | -2.02013600 |
| C  | -4.94166600 | 0.29173900  | 0.12041800  |
| H  | -3.63331700 | 1.56176000  | 1.24492800  |
| C  | -4.32290800 | -0.07658800 | -2.18968900 |
| H  | -2.55349600 | 0.92774900  | -2.85919600 |
| C  | -5.19401700 | -0.30952000 | -1.11718800 |
| H  | -5.58915300 | 0.11663900  | 0.97203100  |
| H  | -4.53149500 | -0.55195400 | -3.14343900 |
| C  | -7.14087300 | -1.43472800 | -0.31708900 |
| H  | -7.89463500 | -2.10757000 | -0.73275900 |
| H  | -6.62547200 | -1.93849900 | 0.51207600  |
| H  | -7.63461300 | -0.53142800 | 0.06699000  |
| O  | -6.25469900 | -1.13698000 | -1.37966600 |
| C  | -3.13298900 | 4.10431800  | 0.36172200  |
| N  | -4.13924000 | 4.62200800  | 0.65977000  |
| Cl | 7.82032400  | -1.64325000 | -0.49775800 |

TS<sub>1i</sub>

Imaginary Freq = -162.86

Charge= -1 multiplicity= 1

|   |             |            |             |
|---|-------------|------------|-------------|
| C | -1.90333500 | 3.76360600 | -2.63607200 |
| C | -0.78664600 | 3.85066700 | -0.49219700 |
| O | 0.93554100  | 1.37432300 | 1.42819100  |
| C | 0.40869700  | 1.88549500 | 0.43878100  |
| O | -1.03464600 | 1.17704100 | -2.86550400 |
| O | -1.16711600 | 5.01269900 | -0.37490200 |
| H | -2.89503300 | 4.00183100 | -2.23864900 |

N -1.09327000 3.09853500 -1.61929000  
C -0.68860200 1.75964500 -1.83231800  
N -0.04789300 3.22401000 0.49948800  
H -1.98911400 3.07522500 -3.47458000  
C 0.16102000 1.18819000 -0.80592500  
C 0.20799100 4.00467000 1.70681800  
H 0.74943400 4.91986200 1.45306000  
H 0.79974200 3.37692300 2.37019800  
H -0.73349700 4.28513100 2.18894700  
H -1.42555800 4.69682600 -2.94503700  
C 5.48360000 0.39716200 0.40840900  
H 5.38239400 1.47574500 0.44944900  
C 1.96629200 -0.60429700 -0.62046900  
O 3.06965300 1.54195200 -0.48964900  
C 2.24644400 -1.93487400 -0.71447900  
C 0.61876100 -0.12235000 -1.00723600  
O 3.44405900 -2.52114100 -0.46874800  
C 4.48946000 -1.74730500 -0.06426500  
C 4.36925700 -0.35751900 0.00739900  
C 3.09827600 0.32283700 -0.36600200  
C 5.68515400 -2.39957600 0.25844900  
H 5.73614700 -3.48118900 0.18814600  
H 0.21037800 -0.59139000 -1.89744700  
C 6.77711600 -1.64590700 0.66177000  
C 6.66323700 -0.24847600 0.73317700  
H 7.71416100 -2.12717300 0.92055500  
H 1.52168100 -2.68984200 -0.99959600  
C -0.93443700 -3.86799300 -1.19338500  
C -0.70794300 -1.48081500 0.43270700  
H -0.70864500 -0.68308800 1.16423600  
N 0.02752200 -4.51807300 -1.34871700  
C -1.89635000 -1.84113500 -0.19300600  
C -2.04788300 -3.02088100 -0.97894600  
H 0.06118200 -2.23285600 0.55845100  
C -3.08369900 -0.93511800 -0.07383600

C -3.79888000 -0.87011200 1.12880800  
C -3.49098900 -0.13898300 -1.15771600  
C -4.91178300 -0.01048100 1.25029600  
C -4.58182200 0.71211300 -1.02904000  
H -2.92404700 -0.16923000 -2.08115300  
C -5.29851500 0.78328000 0.16952200  
H -4.88320600 1.33358000 -1.86798300  
C -3.28249100 -3.42229300 -1.54940500  
N -4.29201000 -3.79023600 -2.01222200  
H -6.14777700 1.45291900 0.25004700  
O -3.40652700 -1.62120800 2.21386500  
O -5.54402000 -0.03063100 2.46865700  
C -6.64499900 0.83630800 2.65113000  
H -6.98660300 0.67737300 3.67672900  
H -6.35864100 1.88986700 2.52565000  
H -7.46667300 0.60728900 1.95744100  
C -4.16437900 -2.81523700 2.40983100  
H -5.20970700 -2.58643300 2.65114800  
H -4.12557200 -3.45734400 1.52131200  
H -3.70185400 -3.33415600 3.25377500  
Cl 8.06644200 0.69132100 1.24637700

**Table 6:** Thermodynamic parameters for intermediates **1a-1i** at b3lyp/6-31g (d) level of theory

| Intermediate <b>1</b> | G            | H            | S       | E            |
|-----------------------|--------------|--------------|---------|--------------|
| In <sub>1a</sub>      | -1635.174085 | -1635.076669 | 205.030 | -1635.521132 |
| In <sub>1b</sub>      | -1749.668383 | -1749.564904 | 217.789 | -1750.044839 |
| In <sub>1c</sub>      | -1864.147823 | -1864.037856 | 231.445 | -1864.552469 |
| In <sub>1d</sub>      | -2094.783251 | -2094.682270 | 212.530 | -2095.118264 |
| In <sub>1e</sub>      | -2554.385223 | -2554.280502 | 220.404 | -2554.707462 |
| In <sub>1f</sub>      | -2094.776113 | -2094.674960 | 212.895 | -2095.110388 |
| In <sub>1h</sub>      | -2209.277611 | -2209.170549 | 225.332 | -2209.642032 |
| In <sub>1i</sub>      | -2323.757254 | -2323.643574 | 239.261 | -2324.149724 |

In<sub>1a</sub>

Charge= -1 multiplicity= 1

C 0.75886300 4.11846300 2.24227400  
C 1.01170400 3.89365300 -0.14611800  
O 0.77637900 1.09251600 -2.35408200  
C 0.68585500 1.67632200 -1.25161300  
O 0.14749800 1.46227900 2.34287700  
O 1.28177300 5.09727500 -0.19929700  
H 1.75412700 4.55552200 2.37293300  
N 0.72377800 3.27441400 1.05481800  
C 0.39389500 1.89181800 1.19686400  
N 0.97913200 3.07648500 -1.26341400  
H 0.50640300 3.48096600 3.08783500  
C 0.37351600 1.10839600 0.00917300  
C 1.29212000 3.66992500 -2.55856700  
H 1.37013100 4.74649700 -2.41757000  
H 0.50658200 3.42328500 -3.27652400  
H 2.23545500 3.27263300 -2.94934300  
H 0.04108300 4.93997200 2.15026200  
C -4.92384000 -0.45959400 -1.36835300

H -4.59576100 -0.45426100 -2.40320600  
C -1.56509500 -0.43205700 0.39489600  
O -2.13038100 -0.44368800 -1.92833400  
C -2.07632000 -0.44150300 1.64863100  
C -0.04761500 -0.33726300 0.22752000  
O -3.40197800 -0.45645200 1.97220900  
C -4.31982300 -0.46029500 0.96414200  
C -3.92587200 -0.45199000 -0.37974800  
C -2.48498900 -0.43734800 -0.74952500  
C -5.67179200 -0.47434300 1.33107100  
H -5.93171200 -0.47961300 2.38505100  
H 0.35899400 -0.61063200 1.20870100  
C -6.63787800 -0.48020800 0.33462700  
C -6.26640600 -0.47286000 -1.02111400  
H -7.68969100 -0.49055400 0.60961400  
H -1.46342800 -0.38629500 2.53820600  
C 0.46841800 -4.27403900 -0.45472600  
C 0.47323400 -1.39252400 -0.81180700  
H 0.68703300 -0.85390900 -1.74395500  
N -0.47072900 -4.94214400 -0.62415200  
C 1.68841200 -2.13308400 -0.33969900  
C 1.65961100 -3.50847100 -0.22295100  
H -0.31823600 -2.10652500 -1.04241600  
C 2.91733700 -1.37238800 -0.02174100  
C 3.71376700 -1.69555800 1.09313900  
C 3.29908800 -0.28579300 -0.83129100  
C 4.86971400 -0.97295300 1.37529600  
H 3.41232200 -2.49731400 1.75814200  
C 4.46966100 0.41885700 -0.55573300  
H 2.68022000 0.01067400 -1.67232100  
C 5.25811000 0.07985700 0.54443400  
H 5.46281000 -1.22968900 2.24903600  
H 4.75347700 1.24966700 -1.19612100  
C 2.79937900 -4.32480300 0.08105000  
N 3.68711100 -5.04474100 0.30747100



H 6.16208100 0.64298000 0.76363100  
H -7.03158500 -0.47824600 -1.79279800

In1b

Charge= -1 multiplicity= 1

C 0.63202900 -4.03178100 -2.18296000  
C 0.74360900 -3.82652500 0.21775200  
O 0.27430700 -1.06388500 2.43670200  
C 0.26775400 -1.63763100 1.32551900  
O -0.08552700 -1.40300000 -2.29104200  
O 1.05743000 -5.01939200 0.27328000  
H 1.64924400 -4.42901900 -2.26139200  
N 0.49790200 -3.20420600 -0.99112700  
C 0.11755800 -1.83502400 -1.13719500  
N 0.61753800 -3.02492900 1.33940900  
H 0.40248300 -3.39413600 -3.03493900  
C 0.00030700 -1.06759800 0.05522100  
C 0.88566700 -3.62031100 2.64369900  
H 1.01746700 -4.69078900 2.49647200  
H 0.05277100 -3.41613500 3.32047400  
H 1.78868100 -3.18802100 3.08866200  
H -0.05728900 -4.88129200 -2.14005200  
C -5.42223600 0.25785900 1.19984600  
H -5.14225400 0.26277100 2.24873600  
C -1.98770200 0.38708300 -0.40604200  
O -2.66015700 0.36551000 1.88867500  
C -2.44078200 0.37990700 -1.68198000  
C -0.47648300 0.35968000 -0.17053900  
O -3.74958100 0.33711900 -2.06665400  
C -4.71204800 0.29564900 -1.10216700  
C -4.38041400 0.29911200 0.25846600  
C -2.95881600 0.34739500 0.69463600  
C -6.04498200 0.25095900 -1.53112000  
H -6.25601300 0.24936400 -2.59599000  
H -0.03952800 0.65929900 -1.13057600

|   |             |             |             |
|---|-------------|-------------|-------------|
| C | -7.05528500 | 0.20933000  | -0.58043400 |
| C | -6.74665000 | 0.21263500  | 0.79099100  |
| H | -8.09273000 | 0.17397000  | -0.90371600 |
| H | -1.78561200 | 0.35638000  | -2.54239400 |
| C | -0.20089200 | 4.28665000  | 0.42499800  |
| C | -0.04926400 | 1.43016100  | 0.89609600  |
| H | 0.14271300  | 0.89909100  | 1.83593200  |
| N | -1.18847800 | 4.89976100  | 0.50535400  |
| C | 1.15323200  | 2.22309000  | 0.47417200  |
| C | 1.04782600  | 3.59179100  | 0.30396200  |
| H | -0.88045600 | 2.10920400  | 1.08900200  |
| C | 2.43363000  | 1.52534300  | 0.25865700  |
| C | 3.30830700  | 1.88357100  | -0.78117500 |
| C | 2.80750800  | 0.44726200  | 1.09156400  |
| C | 4.52024100  | 1.22634600  | -0.97745200 |
| H | 3.03142400  | 2.66972500  | -1.47429000 |
| C | 4.02389300  | -0.19462800 | 0.92006500  |
| H | 2.14095600  | 0.10961300  | 1.87896000  |
| C | 4.89041500  | 0.18905400  | -0.11292400 |
| H | 5.15512300  | 1.52448700  | -1.80372500 |
| H | 4.31598800  | -1.01632600 | 1.56633100  |
| C | 6.95406500  | -0.19001100 | -1.25190700 |
| H | 7.80410600  | -0.86637100 | -1.13909400 |
| H | 6.49511900  | -0.34702100 | -2.23715000 |
| H | 7.30546800  | 0.84838300  | -1.18183500 |
| O | 6.05904000  | -0.51166600 | -0.20188200 |
| C | 2.15233300  | 4.46915700  | 0.04740100  |
| N | 3.00980100  | 5.23476100  | -0.14527800 |
| H | -7.54603600 | 0.18050300  | 1.52653900  |

In<sub>1c</sub>

Charge= -1 multiplicity= 1

|   |             |            |             |
|---|-------------|------------|-------------|
| C | 0.10903100  | 4.21437300 | 2.03042100  |
| C | 0.06344400  | 4.05117800 | -0.37522000 |
| O | -0.27416800 | 1.28327800 | -2.61087400 |

S90

C -0.24440700 1.83419000 -1.48839600  
O -0.26963400 1.51694100 2.13872600  
O 0.23672800 5.27307700 -0.43063500  
H 1.07836300 4.72368200 2.04523700  
N -0.01861700 3.39160800 0.83510600  
C -0.21573900 1.98257600 0.98150900  
N -0.05955900 3.25373400 -1.49983500  
H 0.01571700 3.54395200 2.88317300  
C -0.33459000 1.22141100 -0.21308400  
C 0.02960500 3.89209700 -2.80785400  
H 0.04333200 4.96898700 -2.64902300  
H -0.82412200 3.59554600 -3.42151000  
H 0.93948700 3.57798700 -3.33144400  
H -0.67224900 4.98105000 2.05408000  
C -5.61329900 -0.82456800 -0.82336600  
H -5.45204700 -0.76117400 -1.89510400  
C -2.03822600 -0.51077500 0.40561900  
O -2.95631900 -0.51953800 -1.80281600  
C -2.34479200 -0.60183400 1.72137800  
C -0.58005900 -0.26388800 0.01555600  
O -3.59718700 -0.75476000 2.24307800  
C -4.65609500 -0.82337900 1.38772700  
C -4.47868100 -0.74295600 0.00080700  
C -3.12031900 -0.57719100 -0.58403900  
C -5.92737700 -0.97972200 1.95557000  
H -6.01838500 -1.03640700 3.03587100  
H -0.00242300 -0.52445000 0.91049500  
C -7.03204600 -1.05624200 1.11881400  
C -6.87837500 -0.97884300 -0.27635600  
H -8.02263500 -1.17690600 1.55043300  
H -1.60816700 -0.51006300 2.50797300  
C 0.42368700 -4.09554500 -1.31909200  
C -0.13346900 -1.22724400 -1.13502700  
H -0.16767900 -0.64566300 -2.06895600  
N -0.39180400 -4.90684000 -1.50240200

C 1.23806300 -1.79571300 -0.95032100  
C 1.47094600 -3.14338100 -1.08856900  
H -0.85028700 -2.04310000 -1.24730900  
C 2.37181900 -0.86576900 -0.69291800  
C 3.17573700 -0.98933800 0.45594000  
C 2.61580800 0.16957000 -1.61179600  
C 4.22437800 -0.06485100 0.66810000  
C 3.68449800 1.03291100 -1.42079200  
H 1.94737600 0.30321100 -2.45540800  
C 4.49089400 0.91765100 -0.28590800  
H 3.87963300 1.82363800 -2.13921300  
C 2.78421000 -3.71586000 -1.05302700  
N 3.83574600 -4.21725900 -1.04895200  
H 5.30021100 1.62229900 -0.13130700  
O 2.81995600 -1.93381300 1.37832900  
O 4.91457100 -0.19227800 1.84821600  
C 3.82347800 -2.74905300 1.99294300  
H 4.60987500 -3.01392400 1.28029800  
H 4.25819700 -2.25095800 2.86271600  
H 3.30630400 -3.66069300 2.30361100  
C 5.91051800 0.76748200 2.14269700  
H 5.49638800 1.78425600 2.17010200  
H 6.29357700 0.50723700 3.13206000  
H 6.73617400 0.73630300 1.41769900  
H -7.75042900 -1.04048500 -0.92199200

In<sub>1d</sub>

Charge = -1 multiplicity= 1

C -1.55224700 -4.11158800 2.22862600  
C -1.57656200 -3.86852700 -0.17158700  
O -1.04363700 -1.06833700 -2.32885200  
C -1.07862200 -1.65946600 -1.22748400  
O -0.86411600 -1.47693900 2.40300900  
O -1.87961700 -5.06198000 -0.25756500  
H -2.56802900 -4.51840800 2.26177000

N -1.38036000 -3.26397500 1.05549400  
C -1.02108900 -1.89425400 1.23654100  
N -1.41375200 -3.04873900 -1.27579600  
H -1.36140600 -3.48591900 3.09877500  
C -0.86939400 -1.10662100 0.06144500  
C -1.62250900 -3.62739100 -2.59861300  
H -1.74928800 -4.70111200 -2.47243400  
H -0.76479300 -3.40528000 -3.23759300  
H -2.51093000 -3.19716000 -3.07387300  
H -0.85400500 -4.95424000 2.19864700  
C 4.56698400 0.29746100 -0.81734700  
H 4.34317700 0.31225600 -1.87835600  
C 1.06857100 0.36970100 0.63423300  
O 1.85059000 0.38168700 -1.62719500  
C 1.46126100 0.35139600 1.93023800  
C -0.42927700 0.32471300 0.32771400  
O 2.75224700 0.31751900 2.37507000  
C 3.75649500 0.29849700 1.45736600  
C 3.48987600 0.31548100 0.08330500  
C 2.08837500 0.35336100 -0.42092200  
C 5.06995100 0.26263200 1.94358200  
H 5.23834200 0.24953900 3.01561700  
H -0.91481900 0.60555100 1.27005400  
C 6.12628500 0.24359000 1.04562900  
C 5.86189000 0.26127800 -0.33290700  
H 7.15110200 0.21513800 1.40033500  
H 0.76764000 0.30874500 2.75884000  
C -0.76178700 4.27188300 -0.33212900  
C -0.82108300 1.40064600 -0.74591600  
H -0.96194300 0.87479000 -1.69869700  
N 0.21215700 4.90799800 -0.39361100  
C -2.05410400 2.17209500 -0.37995000  
C -1.99412600 3.54346600 -0.23428700  
H 0.00757200 2.09398900 -0.89460500  
C -3.32992700 1.44547900 -0.19593400

|    |             |             |             |
|----|-------------|-------------|-------------|
| C  | -4.22099700 | 1.77733100  | 0.84217900  |
| C  | -3.66318900 | 0.38276800  | -1.05702200 |
| C  | -5.41963200 | 1.08694100  | 0.99887900  |
| H  | -3.96213100 | 2.55981100  | 1.54687200  |
| C  | -4.87506800 | -0.28924800 | -0.90788100 |
| H  | -2.97429500 | 0.07806900  | -1.83847800 |
| C  | -5.75634700 | 0.05853500  | 0.11653800  |
| H  | -6.08695400 | 1.34956100  | 1.81542700  |
| H  | -5.11974500 | -1.10168700 | -1.58679900 |
| C  | -3.13206600 | 4.39182400  | -0.02618600 |
| N  | -4.01482400 | 5.13655900  | 0.12740700  |
| Cl | 7.22340100  | 0.23678000  | -1.45776400 |
| H  | -6.69354500 | -0.47930200 | 0.23762600  |

In<sub>1e</sub>

Charge= -1 multiplicity= 1

|   |             |             |             |
|---|-------------|-------------|-------------|
| C | 1.07191400  | 4.30685200  | 2.07229800  |
| C | 1.10328900  | 4.01685600  | -0.32249800 |
| O | 0.71081600  | 1.15152400  | -2.42368300 |
| C | 0.72376300  | 1.76293200  | -1.33164400 |
| O | 0.54151400  | 1.64009900  | 2.30210200  |
| O | 1.34050700  | 5.22302200  | -0.43470500 |
| H | 2.06411100  | 4.76901900  | 2.09435900  |
| N | 0.94369500  | 3.42793600  | 0.91682500  |
| C | 0.66550500  | 2.04286600  | 1.12691900  |
| N | 0.98191300  | 3.16679400  | -1.40947000 |
| H | 0.91749500  | 3.68899100  | 2.95520200  |
| C | 0.55284100  | 1.22521100  | -0.03107700 |
| C | 1.14995100  | 3.73066200  | -2.74433400 |
| H | 1.21034900  | 4.81248000  | -2.63992800 |
| H | 0.30569100  | 3.44260500  | -3.37469400 |
| H | 2.06218200  | 3.34780000  | -3.21532800 |
| H | 0.32875000  | 5.10946300  | 2.02784000  |
| C | -4.80779200 | -0.50139700 | -0.74137800 |
| H | -4.61286400 | -0.50767000 | -1.80816700 |

C -1.27295200 -0.36099500 0.61288400  
O -2.11449700 -0.42830700 -1.62611400  
C -1.62977300 -0.35954800 1.91944500  
C 0.21055900 -0.22862600 0.26444700  
O -2.90777800 -0.39997600 2.39956000  
C -3.93629200 -0.44389500 1.51001300  
C -3.70708700 -0.45145500 0.12908500  
C -2.32008100 -0.40873100 -0.41347700  
C -5.23570700 -0.48336800 2.03238900  
H -5.37499700 -0.47482300 3.10864200  
H 0.73930400 -0.47694400 1.19254200  
C -6.31563700 -0.53107400 1.16404000  
C -6.08877000 -0.53967900 -0.22128600  
H -7.33019100 -0.56134300 1.54697300  
H -0.91717700 -0.27377900 2.72820900  
C 1.11587600 -4.15360900 -1.01755500  
C 0.62694400 -1.27355000 -0.82002500  
H 0.61769100 -0.74768500 -1.78806100  
N 0.27628400 -4.93651800 -1.21223000  
C 1.97814300 -1.88278500 -0.61412000  
C 2.18614300 -3.23049700 -0.76915500  
H -0.11659500 -2.07064100 -0.88841700  
C 3.14086400 -0.99300300 -0.33540000  
C 3.92120400 -1.06352400 0.83134400  
C 3.48331300 -0.02090000 -1.29184700  
C 5.01970700 -0.22600900 1.02282300  
C 4.58715200 0.80766700 -1.11455600  
H 2.84750300 0.10101300 -2.16317200  
C 5.36069500 0.70127900 0.04123100  
H 5.59098800 -0.30241000 1.94158700  
H 4.82838300 1.54792900 -1.87172900  
C 3.48875400 -3.83157500 -0.74698400  
N 4.52769200 -4.35658100 -0.76305800  
H 6.21830200 1.35120100 0.19320000  
Cl 3.50993900 -2.16465400 2.14495200

Cl -7.47968300 -0.60111900 -1.30791000

In1f

Charge = -1 multiplicity= 1

C 0.12689500 4.27162800 2.10672200  
C 0.37539300 4.04151700 -0.28145700  
O 0.38972500 1.20430400 -2.45555800  
C 0.25893600 1.78844300 -1.35588300  
O -0.20806400 1.56824200 2.24705300  
O 0.52494700 5.26506000 -0.35340300  
H 1.07444400 4.80851600 2.21893800  
N 0.16248500 3.41317800 0.92972500  
C -0.02350900 2.00556100 1.09274400  
N 0.41148700 3.21005300 -1.38848400  
H -0.04939900 3.62268000 2.96286100  
C 0.02021100 1.20905900 -0.08469800  
C 0.64504500 3.81558400 -2.69471000  
H 0.61084000 4.89618500 -2.56779900  
H -0.11832400 3.47758600 -3.39914300  
H 1.62065400 3.51543100 -3.09317900  
H -0.67124400 5.01537400 2.01505600  
C -5.12560900 -0.91222000 -1.26097300  
H -4.83848700 -0.87028800 -2.30710600  
C -1.72671400 -0.52802300 0.37880400  
O -2.37253800 -0.59409400 -1.92236700  
C -2.18718600 -0.59290500 1.65052100  
C -0.23491600 -0.27318800 0.15616300  
O -3.49085100 -0.74963900 2.02187500  
C -4.43951800 -0.85043500 1.04795800  
C -4.09846700 -0.79839200 -0.30939200  
C -2.68195900 -0.62846700 -0.73109900  
C -5.76773900 -1.01003500 1.46395100  
H -5.98660000 -1.04390400 2.52669200  
H 0.23557800 -0.50316200 1.11974800  
C -6.76365400 -1.11878100 0.50341500



|    |             |             |             |
|----|-------------|-------------|-------------|
| C  | -6.44526200 | -1.07023900 | -0.86494500 |
| H  | -7.79744400 | -1.24222900 | 0.81653400  |
| H  | -1.55107900 | -0.47531800 | 2.51730800  |
| C  | 1.06629600  | -4.08330300 | -1.17259700 |
| C  | 0.34672600  | -1.25683900 | -0.90953400 |
| H  | 0.38209000  | -0.70656400 | -1.86369100 |
| N  | 0.31058000  | -4.91595400 | -1.47501600 |
| C  | 1.71561800  | -1.77693900 | -0.60319400 |
| C  | 2.03733500  | -3.09828100 | -0.79068000 |
| H  | -0.32963500 | -2.10092200 | -1.06088200 |
| C  | 2.77942900  | -0.82037000 | -0.18550100 |
| C  | 3.45993700  | -0.88943900 | 1.04223300  |
| C  | 3.12704800  | 0.21884800  | -1.06664100 |
| C  | 4.47133100  | 0.01497300  | 1.36480900  |
| C  | 4.14592300  | 1.11513400  | -0.75826600 |
| H  | 2.56089400  | 0.33508900  | -1.98573500 |
| C  | 4.82378700  | 1.00985500  | 0.45618300  |
| H  | 4.96573900  | -0.06348400 | 2.32696400  |
| H  | 4.39382000  | 1.90632100  | -1.45976900 |
| C  | 3.37441300  | -3.60537600 | -0.67448800 |
| N  | 4.44715600  | -4.05419700 | -0.61763900 |
| H  | 5.61343000  | 1.71198200  | 0.71022000  |
| H  | -7.23335900 | -1.15692200 | -1.60818700 |
| Cl | 3.02186100  | -2.07724400 | 2.26903600  |

In<sub>1h</sub>

Charge= -1 multiplicity= 1

|   |             |             |             |
|---|-------------|-------------|-------------|
| C | -1.26515000 | -4.02221600 | 2.23028700  |
| C | -1.22118100 | -3.81801600 | -0.17307400 |
| O | -0.57603800 | -1.06397300 | -2.35881200 |
| C | -0.65219400 | -1.63639000 | -1.24990400 |
| O | -0.52649900 | -1.40028900 | 2.38214700  |
| O | -1.54372700 | -5.00713300 | -0.24767600 |
| H | -2.28876000 | -4.41023300 | 2.24226300  |
| N | -1.04658000 | -3.19692100 | 1.04917900  |

C -0.66330400 -1.83215600 1.21814600  
N -1.01367900 -3.01964500 -1.28518000  
H -1.08583300 -3.38614400 3.09535800  
C -0.46604800 -1.06659800 0.03530800  
C -1.20134500 -3.61494100 -2.60375100  
H -1.35312000 -4.68376700 -2.46430700  
H -0.32372100 -3.42018000 -3.22436200  
H -2.06890700 -3.17462800 -3.10739500  
H -0.58209400 -4.87779800 2.23246800  
C 5.01693300 0.21628500 -0.77372600  
H 4.81067900 0.22967900 -1.83830600  
C 1.49745500 0.37145400 0.61951100  
O 2.31724400 0.35491700 -1.62881000  
C 1.86876200 0.35338400 1.92183500  
C 0.00369900 0.35754500 0.29018700  
O 3.15142600 0.29412500 2.38819400  
C 4.16973400 0.24809400 1.48731400  
C 3.92594100 0.26270200 0.10900400  
C 2.53394500 0.32778300 -0.41860600  
C 5.47408900 0.18692800 1.99513400  
H 5.62469200 0.17672900 3.06985000  
H -0.48910300 0.66006200 1.22176800  
C 6.54426600 0.13991200 1.11477300  
C 6.30269300 0.15515000 -0.26794900  
H 7.56234000 0.09163800 1.48636600  
H 1.16082300 0.33122100 2.73911400  
C -0.21117900 4.27670200 -0.27687600  
C -0.34871500 1.43140200 -0.79938400  
H -0.47916000 0.90397200 -1.75139400  
N 0.78633200 4.87886600 -0.27428300  
C -1.57435700 2.22708400 -0.45399400  
C -1.47140400 3.59239100 -0.25797000  
H 0.49501400 2.10913500 -0.93386900  
C -2.87054400 1.53535800 -0.33876000  
C -3.81668700 1.88992300 0.63808700

|    |             |             |             |
|----|-------------|-------------|-------------|
| C  | -3.18934000 | 0.46687700  | -1.20639600 |
| C  | -5.04333800 | 1.23880600  | 0.73969300  |
| H  | -3.58667200 | 2.66796000  | 1.35696300  |
| C  | -4.41838800 | -0.16888200 | -1.12954900 |
| H  | -2.46939900 | 0.13061800  | -1.94581700 |
| C  | -5.35577800 | 0.21139500  | -0.15889900 |
| H  | -5.73488700 | 1.53379800  | 1.52033800  |
| H  | -4.66733400 | -0.98300900 | -1.80286900 |
| C  | -7.49935100 | -0.16361500 | 0.82302600  |
| H  | -8.34255900 | -0.83366100 | 0.64222800  |
| H  | -7.11470100 | -0.33172000 | 1.83775300  |
| H  | -7.83858600 | 0.87748700  | 0.73614800  |
| O  | -6.53137700 | -0.48239000 | -0.16145300 |
| C  | -2.58461200 | 4.47595300  | -0.06937800 |
| N  | -3.44777600 | 5.24629900  | 0.07168900  |
| Cl | 7.68161000  | 0.09486500  | -1.37031600 |

In<sub>1i</sub>

Charge= -1 multiplicity= 1

|   |             |            |             |
|---|-------------|------------|-------------|
| C | 0.89021300  | 4.23982700 | 2.01740300  |
| C | 0.72688300  | 4.05143100 | -0.38166600 |
| O | 0.12039200  | 1.28354900 | -2.56023900 |
| C | 0.23869000  | 1.84485700 | -1.44931300 |
| O | 0.35688600  | 1.57021900 | 2.18002800  |
| O | 0.96963700  | 5.25970000 | -0.46173500 |
| H | 1.88636900  | 4.69290300 | 1.98001400  |
| N | 0.66054600  | 3.41193600 | 0.84079800  |
| C | 0.38898300  | 2.01949600 | 1.01519300  |
| N | 0.50514800  | 3.25023300 | -1.48863100 |
| H | 0.79910600  | 3.58599700 | 2.88313900  |
| C | 0.17549700  | 1.25261300 | -0.16222200 |
| C | 0.57052500  | 3.86785700 | -2.80820000 |
| H | 0.65719900  | 4.94349500 | -2.66502900 |
| H | -0.32793500 | 3.61776900 | -3.37701300 |
| H | 1.43373900  | 3.49260700 | -3.36906800 |

H 0.15552500 5.05010900 2.06611100  
C -5.22332200 -0.48246900 -0.51156400  
H -5.11493700 -0.44630200 -1.59001400  
C -1.59056600 -0.36964700 0.55627700  
O -2.61226200 -0.35743300 -1.60819100  
C -1.84074700 -0.42198900 1.88634900  
C -0.13995000 -0.21350600 0.09776400  
O -3.07599600 -0.48949600 2.46695900  
C -4.17264900 -0.50594800 1.66256100  
C -4.05594500 -0.45858000 0.26836900  
C -2.71739900 -0.38544300 -0.38309500  
C -5.42559900 -0.57436500 2.28600100  
H -5.47736200 -0.60839200 3.36952300  
H 0.46157500 -0.49590500 0.97004800  
C -6.57217300 -0.59588800 1.50656800  
C -6.45787500 -0.54951800 0.10826800  
H -7.55232500 -0.64787200 1.96864700  
H -1.06508800 -0.36254400 2.63739300  
C 0.59692000 -4.11216600 -1.17950300  
C 0.19895400 -1.21485900 -1.05684400  
H 0.14965100 -0.64601100 -1.99752600  
N -0.26977900 -4.88174600 -1.29482300  
C 1.54746700 -1.85012400 -0.92501800  
C 1.70299100 -3.21128200 -1.03225600  
H -0.56281300 -1.99461200 -1.11932100  
C 2.73862200 -0.97407100 -0.75185800  
C 3.58802800 -1.10472500 0.36287200  
C 2.99270400 0.01719100 -1.71544800  
C 4.69167500 -0.23092000 0.49668800  
C 4.11202200 0.82836100 -1.60159600  
H 2.29355300 0.15995500 -2.53209400  
C 4.96331800 0.70608400 -0.50070900  
H 4.31424900 1.58454600 -2.35439700  
C 2.98531800 -3.85119100 -1.04166600  
N 4.00880200 -4.40664700 -1.07168500

|    |             |             |             |
|----|-------------|-------------|-------------|
| Cl | -7.93233300 | -0.57864800 | -0.86442800 |
| H  | 5.81419100  | 1.37127700  | -0.40640700 |
| O  | 3.22772100  | -2.00052700 | 1.33089100  |
| O  | 5.42871500  | -0.35832700 | 1.64776000  |
| C  | 4.21583600  | -2.84979700 | 1.92450000  |
| H  | 4.95154200  | -3.17825300 | 1.18472500  |
| H  | 4.71781600  | -2.34950800 | 2.75588300  |
| H  | 3.66717500  | -3.72220000 | 2.28904500  |
| C  | 6.48666800  | 0.55498800  | 1.86446500  |
| H  | 6.12815200  | 1.59292300  | 1.87687500  |
| H  | 6.90177200  | 0.30502500  | 2.84344500  |
| H  | 7.27420300  | 0.45678600  | 1.10398600  |

**Table 7:** Thermodynamic parameters for TS<sub>2</sub> [1,5]-H shift at b3lyp/6-31g (d) level of theory

| TS <sub>2</sub>       | G            | H            | S       | E            |
|-----------------------|--------------|--------------|---------|--------------|
| TS <sub>2a(1,5)</sub> | -1635.152019 | -1635.054957 | 204.284 | -1635.493811 |
| TS <sub>2b(1,5)</sub> | -1749.645178 | -1749.542279 | 216.570 | -1750.016578 |
| TS <sub>2c(1,5)</sub> | -1864.128564 | -1864.018703 | 231.222 | -1864.528009 |
| TS <sub>2d(1,5)</sub> | -2094.760840 | -2094.660330 | 211.540 | -2095.090730 |
| TS <sub>2e(1,5)</sub> | -2554.367352 | -2554.262217 | 221.277 | -2554.684007 |
| TS <sub>2f(1,5)</sub> | -2094.758652 | -2094.656770 | 214.429 | -2095.087003 |
| TS <sub>2h(1,5)</sub> | -2209.254082 | -2209.147675 | 223.953 | -2209.613510 |
| TS <sub>2i(1,5)</sub> | -2323.737995 | -2323.624645 | 238.564 | -2324.125507 |

TS<sub>2a(1,5)</sub>

Imaginary Freq = -1198.29

Charge = -1 multiplicity= 1

C 3.93647200 -3.45751500 0.99989200  
C 2.42056000 -3.67788100 -0.86059900  
O -0.55637300 -1.91803200 -1.76869600  
C 0.51023300 -2.16009300 -1.06811000  
O 2.41689100 -1.35514700 1.87293500  
O 3.09031300 -4.62683200 -1.26899100  
H 3.80080500 -4.49918800 1.30570500  
N 2.75875000 -2.98180100 0.28173200  
C 2.03028200 -1.87094700 0.81621000  
N 1.27158200 -3.23908100 -1.51594600  
H 4.05235200 -2.81575100 1.87151900  
C 0.90074800 -1.44491800 0.05348600  
C 0.83014300 -3.95985500 -2.70780900  
H 1.56452100 -4.73936800 -2.90126400  
H 0.76266800 -3.27523100 -3.55749200  
H -0.15784400 -4.39825500 -2.54088100

H 4.82103900 -3.40342000 0.35789400  
C 2.63741200 3.66902000 -1.49204800  
H 2.35033200 3.34414300 -2.48734800  
C 0.93017900 1.00531700 0.60019800  
O 1.03701200 1.32835500 -1.76811600  
C 1.36749400 1.47752100 1.78921600  
C 0.08612100 -0.26800200 0.57639800  
O 2.13872800 2.58428300 1.97922200  
C 2.54240600 3.29172400 0.88566500  
C 2.18441200 2.89627200 -0.40941200  
C 1.34424300 1.68945600 -0.62988600  
C 3.33057900 4.42692600 1.11455900  
H 3.58555000 4.69454900 2.13519100  
H -0.15279300 -0.48984000 1.62265500  
C 3.76387600 5.17298100 0.02752200  
C 3.41804100 4.79561500 -1.28192900  
H 4.37679000 6.05516900 0.19455700  
H 1.16257800 0.99176000 2.73438500  
C -2.05775100 -2.02248800 1.97551900  
C -1.23389500 -0.01706500 -0.19437200  
H -1.09876700 -1.02132400 -1.13358000  
N -1.41297100 -2.87723200 2.44269100  
C -2.52529400 -0.15016000 0.38406500  
C -2.91136200 -1.02577600 1.42015800  
H -1.16579400 0.81565800 -0.89069700  
C -3.60039700 0.67733100 -0.25164100  
C -4.77534300 0.09481600 -0.75176700  
C -3.43166500 2.06410100 -0.39108500  
C -5.74915400 0.87486800 -1.37384800  
H -4.91655000 -0.97723900 -0.66072000  
C -4.41170200 2.84731000 -0.99961200  
H -2.52717100 2.52629600 -0.00660100  
C -5.57348100 2.25430100 -1.49686800  
H -6.64770600 0.40220200 -1.76273100  
H -4.26561400 3.92132400 -1.08701500

|   |             |             |             |
|---|-------------|-------------|-------------|
| C | -4.21168600 | -0.99247600 | 2.00383100  |
| N | -5.25929800 | -0.99111000 | 2.52186200  |
| H | -6.33600400 | 2.86254500  | -1.97781000 |
| H | 3.76377000  | 5.38725100  | -2.12537700 |

TS<sub>2b(1,5)</sub>

Imaginary Freq = -1195.73

Charge = -1 multiplicity= 1

|   |            |             |             |
|---|------------|-------------|-------------|
| C | 5.26450100 | -2.36591600 | 0.54493000  |
| C | 3.67577000 | -2.94357400 | -1.17250600 |
| O | 0.26418400 | -2.02013000 | -1.71236400 |
| C | 1.42410300 | -1.98323700 | -1.12788000 |
| O | 3.34546800 | -0.76072200 | 1.65462600  |
| O | 4.52475800 | -3.67281900 | -1.68577900 |
| H | 5.43806800 | -3.41205700 | 0.81419800  |
| N | 3.93596300 | -2.20505200 | -0.03650500 |
| C | 3.00091400 | -1.33835200 | 0.61552300  |
| N | 2.39068000 | -2.81249000 | -1.69533500 |
| H | 5.29770200 | -1.73334600 | 1.43024700  |
| C | 1.72719500 | -1.21113200 | -0.01746300 |
| C | 2.03210300 | -3.60257000 | -2.87088600 |
| H | 2.92073900 | -4.15607700 | -3.16809800 |
| H | 1.70023800 | -2.94498300 | -3.67879500 |
| H | 1.21607000 | -4.28990900 | -2.63040500 |
| H | 6.03319200 | -2.06729300 | -0.17444100 |
| C | 1.90745300 | 4.21102400  | -1.46656200 |
| H | 1.62052900 | 3.84274400  | -2.44667800 |
| C | 1.16977800 | 1.14597200  | 0.64280600  |
| O | 0.95735900 | 1.53608400  | -1.70830400 |
| C | 1.58103400 | 1.69218500  | 1.80914000  |
| C | 0.69002800 | -0.30451000 | 0.63432300  |
| O | 2.04921000 | 2.95989200  | 1.98153500  |
| C | 2.14528300 | 3.77197400  | 0.89045200  |
| C | 1.77986700 | 3.32308100  | -0.38500900 |
| C | 1.26824700 | 1.94148100  | -0.58608800 |



|   |             |             |             |
|---|-------------|-------------|-------------|
| C | 2.62652400  | 5.07055200  | 1.10116900  |
| H | 2.89983100  | 5.37467800  | 2.10672500  |
| H | 0.62375900  | -0.60587500 | 1.68604600  |
| C | 2.74180800  | 5.92757900  | 0.01572700  |
| C | 2.38199000  | 5.49965600  | -1.27426800 |
| H | 3.11508800  | 6.93708300  | 0.16868400  |
| H | 2.47709900  | 6.17949300  | -2.11673700 |
| H | 1.60329800  | 1.14966300  | 2.74536300  |
| C | -0.76038200 | -2.61984000 | 2.09854900  |
| C | -0.72083600 | -0.39420900 | 0.00159300  |
| H | -0.42298700 | -1.31383100 | -0.99216400 |
| N | 0.12908200  | -3.30113600 | 2.42967400  |
| C | -1.86718600 | -0.87191400 | 0.69262600  |
| C | -1.89492200 | -1.85047100 | 1.71071600  |
| H | -0.94070100 | 0.43838800  | -0.66273300 |
| C | -3.17927900 | -0.33413600 | 0.21871500  |
| C | -4.23770400 | -1.17738900 | -0.14081600 |
| C | -3.37748600 | 1.05268000  | 0.08733200  |
| C | -5.45015900 | -0.67220400 | -0.61340700 |
| H | -4.11123700 | -2.25209900 | -0.06316200 |
| C | -4.58219500 | 1.57235900  | -0.36641100 |
| H | -2.57399800 | 1.72940700  | 0.36216700  |
| C | -5.62805500 | 0.71056000  | -0.72216600 |
| H | -6.23880300 | -1.36330400 | -0.88890600 |
| H | -4.73707300 | 2.64362100  | -0.45340300 |
| C | -7.86888600 | 0.48734200  | -1.51367000 |
| H | -8.67283000 | 1.16082600  | -1.82002800 |
| H | -7.62194700 | -0.18240500 | -2.34916500 |
| H | -8.20862500 | -0.11797400 | -0.66212000 |
| O | -6.77634000 | 1.31607800  | -1.16471700 |
| C | -3.07872700 | -2.16327500 | 2.44009900  |
| N | -4.02132600 | -2.44219500 | 3.07274000  |

$TS_{2c(1,5)}$

Imaginary Freq = -1187.86

Charge = -1 multiplicity= 1

C 5.41078000 -2.21240100 1.08542700  
C 4.06197100 -2.83085200 -0.81387800  
O 0.74007100 -1.94951000 -1.80582400  
C 1.80832000 -1.90545900 -1.06775100  
O 3.34720000 -0.61812700 1.91806000  
O 4.98119400 -3.54853300 -1.20893900  
H 5.57384200 -3.25430400 1.37635200  
N 4.16205000 -2.08350200 0.34158800  
C 3.13949800 -1.22462300 0.86010300  
N 2.85388500 -2.72134700 -1.50034100  
H 5.31745600 -1.57929300 1.96605900  
C 1.94641100 -1.13959000 0.07925600  
C 2.66942900 -3.50852600 -2.71721900  
H 3.60019200 -4.04293600 -2.89745300  
H 2.43375300 -2.85057100 -3.55786700  
H 1.84284700 -4.21381100 -2.59132100  
H 6.25678100 -1.89462200 0.46810900  
C 2.07453500 4.20606100 -1.62949800  
H 1.87875800 3.78279000 -2.60986400  
C 1.25507700 1.22264000 0.56377900  
O 1.23274800 1.48875100 -1.81267100  
C 1.55192800 1.83570200 1.73133800  
C 0.82296600 -0.24123800 0.58754500  
O 1.97136100 3.12389900 1.87677600  
C 2.13195200 3.88629000 0.75788100  
C 1.88481300 3.36644900 -0.51905000  
C 1.43321000 1.96040700 -0.69135300  
C 2.55745800 5.20824700 0.94158000  
H 2.73882400 5.56820600 1.94949500  
H 0.67621500 -0.49320500 1.64293400  
C 2.73619200 6.01659000 -0.17225900  
C 2.49483600 5.51709900 -1.46407500  
H 3.06661500 7.04384900 -0.04006100  
H 1.50849900 1.33985700 2.69233300

C -0.66626300 -2.47186900 2.20312900  
C -0.51352600 -0.42503600 -0.17027200  
H -0.05320100 -1.26950200 -1.16366400  
N 0.17307000 -2.88849700 2.90044700  
C -1.65448600 -1.08239600 0.35425500  
C -1.74908300 -2.03036800 1.38836600  
H -0.77298700 0.42039000 -0.80391000  
C -2.91857500 -0.81465600 -0.41740000  
C -3.14243100 -1.47765500 -1.63407400  
C -3.85039700 0.12482000 0.03894000  
C -4.28759700 -1.21602800 -2.37587400  
H -2.41034700 -2.20012500 -1.98143000  
C -5.00368200 0.40055700 -0.72922300  
C -5.22296000 -0.27785700 -1.92946700  
H -4.46037000 -1.73777400 -3.31344600  
C -2.99356600 -2.65365100 1.69500200  
N -4.00519300 -3.16455000 1.98265300  
H -6.10784100 -0.07678800 -2.52317000  
H 2.63840400 6.15939600 -2.32888400  
O -3.58768000 0.82528500 1.19011400  
O -5.84068700 1.36344100 -0.22107300  
C -7.00068400 1.68696300 -0.96023600  
H -7.51180700 2.46752400 -0.39180700  
H -6.75238300 2.07229200 -1.95919100  
H -7.67085300 0.82256700 -1.06967800  
C -4.45342400 0.56689300 2.30250700  
H -5.45240800 0.98144000 2.13055600  
H -4.52507800 -0.50742000 2.50113800  
H -3.99145100 1.06660200 3.15794900

TS<sub>2d(1,5)</sub>

Imaginary Freq = -1196.57

Charge= -1 multiplicity= 1

C -0.28928300 5.34188000 0.91643700  
C 0.79216700 4.44421800 -1.04165800

O 1.85353100 1.14266000 -1.91227900  
C 1.27219900 2.04770900 -1.18425700  
O -0.35091000 2.80144400 1.93536700  
O 0.83119000 5.57912500 -1.51633600  
H 0.50947500 6.06842000 1.09249500  
N 0.22725600 4.18585500 0.19077900  
C 0.14690800 2.89629100 0.80569100  
N 1.31750800 3.33841100 -1.70820800  
H -0.68158100 4.96961300 1.86112800  
C 0.65329600 1.80735000 0.03305000  
C 1.97104000 3.54746400 -2.99854500  
H 1.87813000 4.60514600 -3.23720300  
H 1.49007200 2.93600700 -3.76658800  
H 3.02455600 3.25980800 -2.94006200  
H -1.07598100 5.83406400 0.33657500  
C -4.08842100 -1.08062200 -0.77873400  
H -3.79287300 -1.07787200 -1.82212300  
C -0.84786200 -0.01996500 0.87028300  
O -1.43140300 -0.33538100 -1.43044400  
C -1.33416800 -0.02880100 2.13207200  
C 0.59988900 0.41165000 0.64192000  
O -2.60170600 -0.36775300 2.50236700  
C -3.49070000 -0.71313900 1.53159600  
C -3.12781600 -0.71800000 0.17955200  
C -1.74786400 -0.34730000 -0.23997900  
C -4.78456300 -1.06133600 1.94041400  
H -5.02974600 -1.04328900 2.99741300  
H 1.05128500 0.48417300 1.63778100  
C -5.72460300 -1.41879200 0.98601600  
C -5.36426300 -1.42483300 -0.37097900  
H -6.73256100 -1.69152200 1.27998900  
H -0.75413500 0.26724500 2.99613200  
C 3.51219700 0.45049800 1.70107500  
C 1.35691400 -0.66703100 -0.17145200  
H 1.77779700 0.14286600 -1.21254800

|    |             |             |             |
|----|-------------|-------------|-------------|
| N  | 3.61218400  | 1.54263300  | 2.10332700  |
| C  | 2.49793900  | -1.36419100 | 0.31090700  |
| C  | 3.46988700  | -0.88835500 | 1.21506300  |
| H  | 0.69487200  | -1.29607700 | -0.76209800 |
| C  | 2.72165300  | -2.71914700 | -0.28783300 |
| C  | 3.93030600  | -3.05106800 | -0.91945900 |
| C  | 1.69883400  | -3.68035000 | -0.25737900 |
| C  | 4.10857100  | -4.30406500 | -1.50419200 |
| H  | 4.72731800  | -2.31580100 | -0.96030900 |
| C  | 1.88143900  | -4.93905600 | -0.82872400 |
| H  | 0.75970600  | -3.43581400 | 0.23029700  |
| C  | 3.08695100  | -5.25430700 | -1.45796800 |
| H  | 5.04924000  | -4.53746800 | -1.99675500 |
| H  | 1.07994700  | -5.67253900 | -0.78395200 |
| C  | 4.51308700  | -1.71761100 | 1.72193300  |
| N  | 5.37506000  | -2.36362400 | 2.17504400  |
| Cl | -6.57743800 | -1.88483200 | -1.56853700 |
| H  | 3.22885800  | -6.23308000 | -1.91015100 |

TS<sub>2e(1,5)</sub>

Imaginary Freq = -1184.45

Charge= -1 multiplicity= 1

|   |             |            |             |
|---|-------------|------------|-------------|
| C | 1.08289800  | 5.40119300 | -1.07229000 |
| C | -0.04886600 | 4.68270300 | 0.93121200  |
| O | -1.45239700 | 1.54412200 | 1.91873200  |
| C | -0.79895900 | 2.36154500 | 1.14898300  |
| O | 0.83471200  | 2.84360300 | -2.01953300 |
| O | 0.05605500  | 5.82503300 | 1.37704100  |
| H | 0.37331600  | 6.21542600 | -1.24603900 |
| N | 0.44948000  | 4.33187100 | -0.30706500 |
| C | 0.36690500  | 3.02691500 | -0.88866000 |
| N | -0.67957300 | 3.66088600 | 1.63986700  |
| H | 1.40214200  | 4.96431700 | -2.01682100 |
| C | -0.25684200 | 2.02634400 | -0.08223400 |
| C | -1.25846100 | 3.97220200 | 2.94502300  |

H -1.02838600 5.01444300 3.15734600  
H -0.83068000 3.31947000 3.71044600  
H -2.34104500 3.81688000 2.92676900  
H 1.93883200 5.80602700 -0.52370700  
C 4.04619500 -1.43012300 0.90300300  
H 3.72979800 -1.36908700 1.93844200  
C 1.00654700 -0.00051300 -0.84531000  
O 1.49069300 -0.33755300 1.47386700  
C 1.51402300 -0.09822600 -2.09473300  
C -0.37580300 0.61942600 -0.65751000  
O 2.73673200 -0.60127500 -2.42633300  
C 3.55200400 -1.03725000 -1.42764700  
C 3.16126600 -0.96883100 -0.08513500  
C 1.83127700 -0.41693200 0.29261400  
C 4.80020700 -1.55429100 -1.79784300  
H 5.06923600 -1.58949300 -2.84857800  
H -0.79546200 0.72621400 -1.66348100  
C 5.66569500 -2.00786900 -0.81421600  
C 5.27711000 -1.94056000 0.53323500  
H 6.63723500 -2.41185100 -1.07821600  
H 0.99421600 0.24795900 -2.97823900  
C -3.23877800 1.01988800 -1.87026600  
C -1.28310900 -0.32154300 0.17123600  
H -1.52526200 0.53116200 1.23096000  
N -3.11722600 2.00890800 -2.47901400  
C -2.56184900 -0.76940800 -0.25041800  
C -3.47221100 -0.18435200 -1.14406000  
H -0.73056100 -1.08425100 0.71608700  
C -3.05707500 -1.98232000 0.48660100  
C -3.84094000 -1.81956800 1.63846700  
C -2.73631900 -3.29111500 0.10388100  
C -4.28407800 -2.91391300 2.37797100  
H -4.09569300 -0.80999800 1.94689800  
C -3.17669900 -4.39810700 0.82961700  
C -3.95214500 -4.20653400 1.97166700

|    |             |             |             |
|----|-------------|-------------|-------------|
| H  | -4.88831500 | -2.75604700 | 3.26706600  |
| H  | -2.91087800 | -5.39561300 | 0.49554400  |
| C  | -4.75440200 | -0.76715300 | -1.37393500 |
| N  | -5.80947300 | -1.22108400 | -1.58608400 |
| H  | -4.29468700 | -5.06840600 | 2.53842200  |
| Cl | 6.39543200  | -2.52458700 | 1.76868400  |
| Cl | -1.75885300 | -3.58260800 | -1.33412900 |

TS<sub>2f(1,5)</sub>

Imaginary Freq = -1185.87

Charge = -1 multiplicity= 1

|   |             |             |             |
|---|-------------|-------------|-------------|
| C | 4.33699600  | -3.23146400 | 1.16643600  |
| C | 2.88699700  | -3.57413600 | -0.72824400 |
| O | -0.14866700 | -1.99028000 | -1.76347800 |
| C | 0.90274000  | -2.16808700 | -1.02155600 |
| O | 2.68586200  | -1.19150700 | 1.94601600  |
| O | 3.61940900  | -4.49171700 | -1.09880000 |
| H | 4.25641200  | -4.27499300 | 1.48472800  |
| N | 3.15262400  | -2.83971700 | 0.40924000  |
| C | 2.35080500  | -1.75905500 | 0.89904000  |
| N | 1.73612100  | -3.21091300 | -1.42590200 |
| H | 4.38920800  | -2.57106000 | 2.03022900  |
| C | 1.21233300  | -1.42187600 | 0.10491500  |
| C | 1.37816800  | -3.96876300 | -2.62262000 |
| H | 2.16509400  | -4.70288300 | -2.78442700 |
| H | 1.29500100  | -3.29721000 | -3.48119500 |
| H | 0.41472900  | -4.46740300 | -2.48220700 |
| H | 5.23447300  | -3.13202900 | 0.54812700  |
| C | 2.57963800  | 3.71396300  | -1.70352800 |
| H | 2.29466700  | 3.32901600  | -2.67778400 |
| C | 1.08110500  | 1.04605200  | 0.53668400  |
| O | 1.12461400  | 1.26635000  | -1.84397900 |
| C | 1.50708900  | 1.59634600  | 1.69566900  |
| C | 0.32343700  | -0.27844600 | 0.58240100  |
| O | 2.21269000  | 2.75458400  | 1.82094000  |

|    |             |             |             |
|----|-------------|-------------|-------------|
| C  | 2.55128300  | 3.43653100  | 0.68969000  |
| C  | 2.19497600  | 2.96357000  | -0.57963100 |
| C  | 1.42859500  | 1.69877600  | -0.72989500 |
| C  | 3.27231600  | 4.62629100  | 0.85320700  |
| H  | 3.52840500  | 4.95379600  | 1.85593600  |
| H  | 0.11135900  | -0.46724000 | 1.64023800  |
| C  | 3.63910000  | 5.34868000  | -0.27355600 |
| C  | 3.29331200  | 4.89390400  | -1.55815600 |
| H  | 4.19931800  | 6.27305000  | -0.15719900 |
| H  | 1.34645100  | 1.14275500  | 2.66502600  |
| C  | -1.66362100 | -2.10924500 | 2.17921100  |
| C  | -1.01396200 | -0.16401200 | -0.18864100 |
| H  | -0.76575000 | -1.12408300 | -1.14606300 |
| N  | -0.94487000 | -2.74376300 | 2.84576600  |
| C  | -2.28002000 | -0.50271700 | 0.35500800  |
| C  | -2.60909800 | -1.38599900 | 1.39492400  |
| H  | -1.05882300 | 0.69978000  | -0.84878200 |
| C  | -3.44242800 | 0.07495500  | -0.40339200 |
| C  | -4.01863900 | -0.66038800 | -1.44981000 |
| C  | -3.96389400 | 1.34943600  | -0.14670300 |
| C  | -5.06877900 | -0.14727500 | -2.20800100 |
| H  | -3.62178200 | -1.64897700 | -1.66075100 |
| C  | -5.01866400 | 1.87598200  | -0.89266200 |
| C  | -5.57107800 | 1.12365000  | -1.92761100 |
| H  | -5.49361100 | -0.74014500 | -3.01336900 |
| H  | -5.39707700 | 2.86532000  | -0.65738600 |
| C  | -3.97064900 | -1.64850400 | 1.73215600  |
| N  | -5.07467500 | -1.88196300 | 2.03386900  |
| H  | -6.39234900 | 1.53353100  | -2.50982600 |
| Cl | -3.29623600 | 2.33804900  | 1.15114500  |
| H  | 3.58627400  | 5.46798100  | -2.43314300 |

TS<sub>2h(1,5)</sub>

Imaginary Freq = -1194.44

Charge= -1 multiplicity= 1



C 3.90462900 -4.32946500 0.43826500  
C 2.32660000 -4.15040200 -1.37464300  
O -0.56298500 -2.10253000 -1.86501800  
C 0.50746700 -2.51675300 -1.25597800  
O 2.54001700 -2.32180900 1.70402500  
O 2.92491200 -5.05362700 -1.95878200  
H 3.71246200 -5.39790100 0.57402300  
N 2.73901500 -3.67454000 -0.14661400  
C 2.09446500 -2.63138400 0.59111200  
N 1.18881700 -3.54458000 -1.90510100  
H 4.08534900 -3.84932400 1.39834100  
C 0.97249600 -2.02114700 -0.04771200  
C 0.67007900 -4.03179700 -3.18146400  
H 1.35108600 -4.80600700 -3.52949900  
H 0.61801000 -3.21227000 -3.90309900  
H -0.33649400 -4.43885400 -3.05023200  
H 4.77200200 -4.22008100 -0.21981900  
C 2.98268800 3.16853900 -0.74453800  
H 2.65667800 3.04739600 -1.77169500  
C 1.16391200 0.28858500 0.91202500  
O 1.24211700 1.01865300 -1.36712800  
C 1.65800700 0.51679100 2.14990600  
C 0.24146600 -0.91003300 0.69586400  
O 2.50287800 1.52640600 2.50460000  
C 2.92426500 2.38865100 1.53982800  
C 2.51294100 2.25041800 0.20887100  
C 1.59227800 1.15125100 -0.19354600  
C 3.78851200 3.41887400 1.93252200  
H 4.08757600 3.49260000 2.97310600  
H 0.01281700 -1.29649400 1.69562000  
C 4.24523800 4.32029300 0.98323300  
C 3.83491600 4.18471400 -0.35264100  
H 4.91546800 5.12542000 1.26493000  
H 1.44531900 -0.11510500 3.00206000  
C -1.96731600 -2.76830200 1.81461300

|    |             |             |             |
|----|-------------|-------------|-------------|
| C  | -1.07762400 | -0.45457300 | 0.02510600  |
| H  | -1.02946400 | -1.30071800 | -1.07577600 |
| N  | -1.36600300 | -3.73545900 | 2.07533400  |
| C  | -2.35917200 | -0.60564700 | 0.62116800  |
| C  | -2.76641900 | -1.63087800 | 1.50280400  |
| H  | -0.97332000 | 0.47489100  | -0.52990100 |
| C  | -3.39425500 | 0.38282100  | 0.18925800  |
| C  | -4.64165700 | -0.02074600 | -0.30247600 |
| C  | -3.12693700 | 1.76352300  | 0.23364500  |
| C  | -5.59335900 | 0.90388500  | -0.73570100 |
| H  | -4.87287900 | -1.07908100 | -0.36157400 |
| C  | -4.06790900 | 2.69710500  | -0.17875200 |
| H  | -2.16855200 | 2.10422000  | 0.61384600  |
| C  | -5.30962200 | 2.27164500  | -0.66911100 |
| H  | -6.54239700 | 0.54525700  | -1.11794400 |
| H  | -3.86400400 | 3.76254900  | -0.13035300 |
| C  | -7.44487100 | 2.88605900  | -1.54148600 |
| H  | -7.96675700 | 3.81611200  | -1.77869900 |
| H  | -7.36988200 | 2.27297500  | -2.45032100 |
| H  | -8.01804400 | 2.33199900  | -0.78558700 |
| O  | -6.17011400 | 3.26566900  | -1.05806100 |
| C  | -4.03254000 | -1.61988600 | 2.15723700  |
| N  | -5.05331200 | -1.64508800 | 2.72618800  |
| Cl | 4.42830300  | 5.34500800  | -1.54397700 |

TS<sub>2i(1,5)</sub>

Imaginary Freq = -1185.07

Charge= -1 multiplicity= 1

|   |             |            |             |
|---|-------------|------------|-------------|
| C | -3.55277700 | 4.65050000 | 1.09059700  |
| C | -2.06556400 | 4.62464000 | -0.80632700 |
| O | 0.53670600  | 2.38191200 | -1.80449900 |
| C | -0.44411300 | 2.80776500 | -1.06632100 |
| O | -2.39597400 | 2.30905500 | 1.91394300  |
| O | -2.57672200 | 5.67397500 | -1.19725900 |
| H | -3.24251800 | 5.65639400 | 1.38823200  |

N -2.48525700 3.99087200 0.34542800  
C -1.94236700 2.76975100 0.85909300  
N -1.02605500 4.00031200 -1.49440300  
H -3.74925600 4.03575500 1.96720200  
C -0.90534400 2.17472400 0.07731500  
C -0.51258200 4.63416400 -2.70671000  
H -1.11419600 5.52377500 -2.88268200  
H -0.58802800 3.94468300 -3.55170400  
H 0.53929900 4.90449300 -2.57689600  
H -4.45055400 4.73989500 0.47124300  
C -3.36418400 -2.56785600 -1.63710000  
H -3.00262800 -2.27680900 -2.61841200  
C -1.31819800 -0.24994300 0.55646600  
O -1.41495500 -0.49999400 -1.82174800  
C -1.85780000 -0.66884700 1.72247400  
C -0.28709300 0.87517800 0.58254700  
O -2.80397500 -1.64276700 1.86559700  
C -3.27884400 -2.25411500 0.74772500  
C -2.82547100 -1.89662300 -0.52805900  
C -1.80092700 -0.83304400 -0.70002200  
C -4.24325900 -3.25338500 0.93556800  
H -4.57441400 -3.50523000 1.93607700  
H -0.04461100 1.03476800 1.63825400  
C -4.74551800 -3.88950400 -0.18776500  
C -4.31885200 -3.56097400 -1.48367800  
H -1.60534000 -0.24346700 2.68471200  
C 2.02609400 2.22877100 2.19430900  
C 0.99413900 0.45527300 -0.17622700  
H 0.95066600 1.42335400 -1.16809600  
N 1.45138700 2.97510000 2.88493700  
C 2.30696400 0.54218100 0.35113300  
C 2.80653900 1.35196500 1.38600300  
H 0.85657400 -0.41621700 -0.81259200  
C 3.32490000 -0.25715500 -0.41679300  
C 3.82691800 0.23958000 -1.62967900

C 3.73905600 -1.51388200 0.03948900  
C 4.74009600 -0.50289400 -2.36791100  
H 3.49498000 1.21314700 -1.97689400  
C 4.65391400 -2.27230700 -0.72475200  
C 5.15822100 -1.75994700 -1.92149300  
H 5.13205400 -0.11075600 -3.30261200  
C 4.19695000 1.36066400 1.69919700  
N 5.32876900 1.37137000 1.99211800  
H 5.86468500 -2.33231700 -2.51242600  
H -4.73515600 -4.08069400 -2.33965000  
O 3.18612200 -2.02672300 1.18680400  
O 4.97306900 -3.50723600 -0.21664000  
C 5.87288700 -4.31161100 -0.95186600  
H 5.98054400 -5.23872800 -0.38406600  
H 5.48485800 -4.54500100 -1.95331800  
H 6.85787000 -3.83475700 -1.05481100  
C 4.07039300 -2.17716600 2.30462800  
H 4.78808100 -2.98665300 2.13452800  
H 4.60384200 -1.24326500 2.50951300  
H 3.43082900 -2.42705000 3.15514300  
Cl -5.95992600 -5.15177000 0.01718000

**Table 8:** Thermodynamic parameters for TS<sub>2</sub> [1,3]-H shift at b3lyp/6-31g (d) level of theory

| TS <sub>2</sub>       | G            | H            | S       | E            |
|-----------------------|--------------|--------------|---------|--------------|
| TS <sub>2a(1,3)</sub> | -1635.123209 | -1635.025868 | 204.872 | -1635.464297 |
| TS <sub>2b(1,3)</sub> | -1749.616354 | -1749.512902 | 217.733 | -1749.986732 |
| TS <sub>2c(1,3)</sub> | -1864.1001   | -1863.990439 | 135.744 | -1864.499223 |
| TS <sub>2d(1,3)</sub> | -2094.731953 | -2094.631114 | 212.234 | -2095.061080 |
| TS <sub>2e(1,3)</sub> | -2554.337112 | -2554.232564 | 220.040 | -2554.653795 |
| TS <sub>2f(1,3)</sub> | -2094.726194 | -2094.624718 | 213.574 | -2095.054321 |
| TS <sub>2h(1,3)</sub> | -2209.225070 | -2209.118171 | 224.988 | -2209.583545 |
| TS <sub>2i(1,3)</sub> | -2323.709051 | -2323.595966 | 238.009 | -2324.096278 |

TS<sub>2a(1,3)</sub>

Imaginary Freq = -1582.98

Charge= -1 multiplicity= 1

C 0.63096200 4.65119000 -1.99490300  
C 1.59206600 4.04373000 0.13966300  
O 1.58349000 0.99250000 2.00777900  
C 1.26525700 1.78910700 1.12456800  
O -0.41276300 2.11989000 -2.11560700  
O 2.09855200 5.16114200 0.19620800  
H 0.21540300 5.57611300 -1.58626500  
N 0.79374800 3.66303600 -0.93122000  
C 0.20644900 2.38520400 -1.08353900  
N 1.79150100 3.10390800 1.14015500  
H -0.04045600 4.21650200 -2.73280400  
C 0.30072300 1.50196500 0.07239400  
C 2.66804500 3.50339200 2.23845200  
H 3.67668900 3.71193000 1.86857600  
H 2.68957000 2.67553400 2.94472600  
H 2.28341000 4.40979100 2.71323300

H 1.59690300 4.88345700 -2.45358500  
C 4.30816600 -2.14983500 -1.15911800  
H 4.57069900 -1.31059100 -1.79569600  
C 0.87616500 -1.05212000 0.03223700  
O 2.43106300 -0.01085600 -1.44483700  
C 0.64766800 -2.13948100 0.79984500  
C -0.16331200 0.03567900 -0.11296200  
O 1.49658200 -3.19344000 0.96058200  
C 2.69486900 -3.17401500 0.31024600  
C 3.05918100 -2.10380700 -0.51700900  
C 2.13939600 -0.95650200 -0.71023000  
C 3.54312200 -4.27186800 0.50382100  
H 3.22105000 -5.07859900 1.15469300  
H -0.55965800 -0.00958600 -1.13104200  
C 4.77161800 -4.29188800 -0.14120300  
C 5.15899700 -3.22911700 -0.97634600  
H 5.43769300 -5.13863900 0.00399900  
H -0.25094200 -2.28463900 1.38619000  
C -3.06708000 -0.47626600 3.15666100  
C -1.31138600 0.05387800 0.91042200  
N -2.69122200 -0.41083600 4.26141600  
C -2.63990200 -0.40716900 0.71970500  
C -3.52555800 -0.57302000 1.81327700  
H -0.94947000 0.02050000 1.93991600  
C -3.16329000 -0.70664400 -0.64542500  
C -3.77598700 -1.94585800 -0.90197900  
C -3.05304000 0.21417700 -1.70023200  
C -4.25718300 -2.25760800 -2.17184700  
H -3.86693300 -2.66872500 -0.09721700  
C -3.53901300 -0.09904700 -2.97000600  
H -2.57291100 1.17240100 -1.53852700  
C -4.14257500 -1.33339300 -3.21212900  
H -4.72396300 -3.22400000 -2.34668900  
H -3.43694100 0.62860300 -3.77088400  
C -4.92544300 -0.77603900 1.66544400

N -6.07881200 -0.95115500 1.58890700  
H -0.96988300 1.45456600 0.73331700  
H 6.12396500 -3.25623700 -1.47527900  
H -4.51960400 -1.57480800 -4.20331600

TS<sub>2b(1,3)</sub>

Imaginary Freq = -1586.33

Charge= -1 multiplicity= 1

C -1.47473100 -4.24037400 -2.57252100  
C -2.75133600 -3.65319800 -0.60403500  
O -2.54961900 -0.89667000 1.66742200  
C -2.20654700 -1.64929800 0.75546100  
O 0.06011900 -2.02030000 -2.09886100  
O -3.47314000 -4.62339600 -0.81883000  
H -1.35792500 -5.27340100 -2.23431200  
N -1.67098400 -3.35742600 -1.42517300  
C -0.81801500 -2.24088600 -1.26254100  
N -2.97748000 -2.80213500 0.46760700  
H -0.58023600 -3.89725500 -3.08865000  
C -0.99039100 -1.48455100 -0.02821800  
C -4.14286500 -3.10029800 1.29651200  
H -5.06199300 -3.03020800 0.70660300  
H -4.15554200 -2.36809300 2.10171900  
H -4.06855800 -4.11549300 1.69498500  
H -2.33839800 -4.19541800 -3.24290100  
C -3.79611400 3.09867000 -1.45962800  
H -4.07015800 2.41449100 -2.25668600  
C -1.01635700 1.12335700 0.20591200  
O -2.37209300 0.62918100 -1.69188400  
C -0.75470500 2.04127600 1.16130500  
C -0.21100100 -0.15200000 0.10480300  
O -1.38858900 3.23868900 1.31005200  
C -2.38674700 3.56356400 0.43992600  
C -2.76087500 2.69963400 -0.59741000  
C -2.07083000 1.39920000 -0.77794700

|   |             |             |             |
|---|-------------|-------------|-------------|
| C | -3.01892100 | 4.79949300  | 0.62759700  |
| H | -2.69807100 | 5.43685800  | 1.44553200  |
| H | 0.40366800  | -0.09128200 | -0.79735400 |
| C | -4.03923000 | 5.16897300  | -0.23734000 |
| C | -4.43196100 | 4.31838300  | -1.28579500 |
| H | -4.53721500 | 6.12530200  | -0.09876400 |
| H | -0.00288300 | 1.91293000  | 1.92982400  |
| C | 1.90272300  | -0.60356400 | 3.93153300  |
| C | 0.64996300  | -0.53813400 | 1.31935000  |
| N | 1.27614800  | -0.66742000 | 4.91624400  |
| C | 2.05117900  | -0.37031000 | 1.47001600  |
| C | 2.67146800  | -0.50813600 | 2.73820800  |
| H | 0.07814300  | -0.53136600 | 2.24929300  |
| C | 2.92662800  | -0.07261200 | 0.30144100  |
| C | 3.85225500  | 0.97851400  | 0.36696600  |
| C | 2.86031600  | -0.80993200 | -0.89645100 |
| C | 4.68222700  | 1.29727200  | -0.70854300 |
| H | 3.92270400  | 1.56826700  | 1.27535100  |
| C | 3.68501000  | -0.50674200 | -1.97199400 |
| H | 2.15079600  | -1.62292600 | -0.99937100 |
| C | 4.60332600  | 0.54686700  | -1.88587800 |
| H | 5.37978000  | 2.12168200  | -0.61147300 |
| H | 3.62791200  | -1.07832200 | -2.89307000 |
| C | 6.32881300  | 1.80543500  | -2.95117200 |
| H | 6.83278500  | 1.79944200  | -3.92067100 |
| H | 5.85704900  | 2.78618600  | -2.79705700 |
| H | 7.07043800  | 1.64055900  | -2.15725700 |
| O | 5.37289900  | 0.76456300  | -3.00068500 |
| C | 4.07726400  | -0.62864200 | 2.91635500  |
| N | 5.22681700  | -0.72298000 | 3.10839700  |
| H | 0.07919000  | -1.79927900 | 0.86752500  |
| H | -5.23289100 | 4.61875900  | -1.95596900 |

TS<sub>2d(1,3)</sub>

Imaginary Freq = -1584.29



Charge= -1 multiplicity= 1

|   |             |             |             |
|---|-------------|-------------|-------------|
| C | -0.95294300 | 4.65889900  | -2.13731600 |
| C | -0.04852600 | 4.41240200  | 0.09254600  |
| O | 0.63501100  | 1.53935900  | 2.11255900  |
| C | 0.18077800  | 2.18912400  | 1.17017000  |
| O | -1.24062300 | 1.93256100  | -2.19610200 |
| O | 0.12082600  | 5.62797200  | 0.12640200  |
| H | -1.64384800 | 5.44106200  | -1.81180900 |
| N | -0.61534500 | 3.78974600  | -1.01230200 |
| C | -0.81161300 | 2.39498200  | -1.13742900 |
| N | 0.31989200  | 3.59752100  | 1.15350300  |
| H | -1.40936200 | 4.03021500  | -2.89932100 |
| C | -0.57901700 | 1.61188000  | 0.07034400  |
| C | 0.95821700  | 4.26086900  | 2.28815200  |
| H | 1.89589400  | 4.73276400  | 1.97902500  |
| H | 1.15101900  | 3.49481900  | 3.03686400  |
| H | 0.29936800  | 5.03677700  | 2.68649700  |
| H | -0.05341000 | 5.13979800  | -2.53325000 |
| C | 4.35501600  | -0.83259600 | -0.64432800 |
| H | 4.44186200  | 0.01777800  | -1.31155600 |
| C | 0.66818200  | -0.68455300 | 0.22126800  |
| O | 2.01021000  | 0.68372800  | -1.19933500 |
| C | 0.67600400  | -1.76194500 | 1.03578000  |
| C | -0.61045300 | 0.06928500  | -0.06495000 |
| O | 1.76235600  | -2.53420200 | 1.32517800  |
| C | 2.96068200  | -2.21035600 | 0.76751500  |
| C | 3.09367100  | -1.11592400 | -0.09548600 |
| C | 1.91734800  | -0.27320600 | -0.43026700 |
| C | 4.05736200  | -3.02011300 | 1.09031600  |
| H | 3.91723400  | -3.85894400 | 1.76432000  |
| H | -0.88845800 | -0.11984800 | -1.10548000 |
| C | 5.29821700  | -2.73080500 | 0.54397500  |
| C | 5.43476200  | -1.63437600 | -0.32262600 |
| H | 6.16117700  | -3.34370900 | 0.78147200  |
| H | -0.19722900 | -2.12599400 | 1.56191900  |

|    |             |             |             |
|----|-------------|-------------|-------------|
| C  | -3.52093200 | -1.13057700 | 3.00742400  |
| C  | -1.80383200 | -0.19477000 | 0.86820300  |
| N  | -3.26596700 | -0.93283000 | 4.13072200  |
| C  | -2.93307500 | -1.01416200 | 0.60686100  |
| C  | -3.82509300 | -1.38840600 | 1.64156500  |
| H  | -1.53643100 | -0.09196100 | 1.92170800  |
| C  | -3.23780000 | -1.48753900 | -0.77515600 |
| C  | -3.46259000 | -2.85522100 | -1.01136900 |
| C  | -3.29660000 | -0.60364600 | -1.86507300 |
| C  | -3.73122100 | -3.32543700 | -2.29512000 |
| H  | -3.41882800 | -3.55104600 | -0.17927100 |
| C  | -3.56937700 | -1.07656900 | -3.14899000 |
| H  | -3.11408800 | 0.45462400  | -1.71830100 |
| C  | -3.78796200 | -2.43660400 | -3.37042800 |
| H  | -3.89823300 | -4.38812400 | -2.45353900 |
| H  | -3.60438900 | -0.37304300 | -3.97666100 |
| C  | -5.09790100 | -1.97777900 | 1.40554500  |
| N  | -6.14785700 | -2.46957800 | 1.25639400  |
| Cl | 7.02425100  | -1.28705600 | -1.00720300 |
| H  | -1.84009900 | 1.24048500  | 0.63783600  |
| H  | -3.99954800 | -2.80220100 | -4.37260100 |

TS<sub>2e(1,3)</sub>

Imaginary Freq = -1567.49

Charge= -1 multiplicity= 1

|   |             |            |             |
|---|-------------|------------|-------------|
| C | 0.58139500  | 4.82056100 | 2.17479300  |
| C | -0.40512500 | 4.57237500 | -0.01982400 |
| O | -0.98151100 | 1.71514100 | -2.09764300 |
| C | -0.53666500 | 2.36823600 | -1.15259200 |
| O | 1.05610100  | 2.11696200 | 2.13795800  |
| O | -0.65442700 | 5.77463600 | -0.01119300 |
| H | 1.21509800  | 5.64836700 | 1.84519000  |
| N | 0.24968400  | 3.96039700 | 1.04146200  |
| C | 0.54316600  | 2.57866400 | 1.11740300  |
| N | -0.76531200 | 3.76360400 | -1.08866100 |

H 1.10114900 4.20053300 2.90267300  
C 0.29771800 1.81382300 -0.09855400  
C -1.49052600 4.41430300 -2.17733900  
H -2.44229300 4.81702400 -1.81762800  
H -1.66572200 3.65718000 -2.93938200  
H -0.89901000 5.24091200 -2.57948300  
H -0.32773400 5.24034900 2.61555200  
C -4.44448800 -0.95666900 0.63249000  
H -4.57763200 -0.12079300 1.31031200  
C -0.78780900 -0.55989000 -0.27858800  
O -2.19283400 0.69633000 1.18396000  
C -0.73421400 -1.62955500 -1.10174700  
C 0.44012000 0.27616900 -0.00253400  
O -1.77184400 -2.46762100 -1.38485600  
C -2.98166500 -2.22705200 -0.81052400  
C -3.17438600 -1.15239600 0.06592700  
C -2.05047900 -0.23998000 0.39695900  
C -4.02776700 -3.10267000 -1.12933100  
H -3.84177100 -3.92438600 -1.81323100  
H 0.75973700 0.08746500 1.02707100  
C -5.27794600 -2.89951900 -0.56570800  
C -5.47424300 -1.82293600 0.31420400  
H -6.10239600 -3.56459600 -0.79963200  
H 0.15687200 -1.93870900 -1.63265900  
C 3.65959600 -0.43730600 -2.99353200  
C 1.63502400 0.11904500 -0.95755500  
N 3.48715400 -0.16195300 -4.11585700  
C 2.84023200 -0.56662600 -0.67058100  
C 3.85704200 -0.77188400 -1.62565800  
H 1.36424700 0.19826200 -2.01221700  
C 3.11781400 -1.02277000 0.72909400  
C 3.04912700 -2.37038300 1.11553100  
C 3.46027500 -0.08811000 1.71904100  
C 3.32573800 -2.77824200 2.41963800  
C 3.73594500 -0.47992500 3.02710700

|    |             |             |             |
|----|-------------|-------------|-------------|
| H  | 3.48556000  | 0.96255900  | 1.45379700  |
| C  | 3.67570900  | -1.82786900 | 3.37720500  |
| H  | 3.26159800  | -3.83096100 | 2.67402300  |
| H  | 3.98874400  | 0.27132700  | 3.76944000  |
| C  | 5.13522200  | -1.28943600 | -1.28067500 |
| N  | 6.19348600  | -1.71195100 | -1.02133400 |
| Cl | -7.07453500 | -1.58552100 | 1.02052300  |
| H  | 1.56793700  | 1.53817700  | -0.71772300 |
| H  | 3.89058600  | -2.14492100 | 4.39438300  |
| Cl | 2.57178200  | -3.61517300 | -0.04190200 |

TS<sub>2f(1,3)</sub>

Imaginary Freq = -1578.81

Charge= -1 multiplicity= 1

|   |             |             |             |
|---|-------------|-------------|-------------|
| C | -0.54515900 | 4.52267300  | -1.81685300 |
| C | 0.66118900  | 4.20797400  | 0.25631100  |
| O | 1.64779100  | 1.26926900  | 2.04977000  |
| C | 1.06261900  | 1.94793200  | 1.20374100  |
| O | -0.77679300 | 1.79072300  | -1.95486500 |
| O | 0.82112800  | 5.42454000  | 0.31753500  |
| H | -1.18301000 | 5.28838000  | -1.36769900 |
| N | -0.04530800 | 3.62000800  | -0.78334700 |
| C | -0.23537700 | 2.22502800  | -0.93969700 |
| N | 1.18496600  | 3.35902000  | 1.22224000  |
| H | -1.10656900 | 3.91487800  | -2.52394000 |
| C | 0.16387600  | 1.40679700  | 0.19918900  |
| C | 1.96627700  | 3.98900500  | 2.28300100  |
| H | 2.84218500  | 4.49575000  | 1.86618800  |
| H | 2.27674700  | 3.19645000  | 2.96149900  |
| H | 1.35847900  | 4.73217800  | 2.80608000  |
| H | 0.28471100  | 5.02325900  | -2.32560400 |
| C | 4.93238600  | -1.01433300 | -1.32726300 |
| H | 4.92289200  | -0.12828100 | -1.95440100 |
| C | 1.40304500  | -0.89673800 | 0.06625800  |
| O | 2.53640900  | 0.53919800  | -1.46349600 |

C 1.52090800 -2.01348200 0.81674200  
C 0.10481400 -0.12541400 0.00577200  
O 2.62970200 -2.80174500 0.90635100  
C 3.74013000 -2.45233600 0.19598200  
C 3.75550800 -1.31453900 -0.62078500  
C 2.55135100 -0.45596000 -0.73794700  
C 4.86190500 -3.28246300 0.31717600  
H 4.80630800 -4.15321700 0.96286400  
H -0.32955500 -0.26032600 -0.99007900  
C 6.01202900 -2.96273100 -0.39051500  
C 6.05123000 -1.82565300 -1.21657300  
H 6.88854800 -3.59954200 -0.30161400  
H 0.73158900 -2.40113800 1.44860700  
C -2.57807700 -1.53424200 3.26435100  
C -0.94766300 -0.44039900 1.08052900  
N -2.24071100 -1.46259300 4.38071200  
C -2.14669600 -1.15825200 0.86375300  
C -2.97397700 -1.63335800 1.90177400  
H -0.54881000 -0.45777200 2.09625700  
C -2.60536100 -1.41273500 -0.54104700  
C -3.41644500 -0.52202500 -1.25843200  
C -2.20860000 -2.59223200 -1.18905700  
C -3.80832300 -0.78668400 -2.57083000  
C -2.59343800 -2.87069500 -2.49852700  
H -1.58562400 -3.29485800 -0.64297500  
C -3.39424000 -1.96282100 -3.19152200  
H -4.43053300 -0.06881600 -3.09430800  
H -2.26867900 -3.79228700 -2.97382200  
C -4.23582300 -2.24000200 1.65429300  
N -5.26781500 -2.75860600 1.47575500  
H -1.00845700 0.98646400 0.94415900  
H -3.69892400 -2.16535500 -4.21494200  
Cl -3.98716200 0.96324100 -0.51177400  
H 6.95810600 -1.58543400 -1.76490700

TS<sub>2h(1,3)</sub>

Imaginary Freq = -1588.81

Charge= -1 multiplicity= 1

|   |             |             |             |
|---|-------------|-------------|-------------|
| C | -0.06631500 | 4.35717600  | -2.94345900 |
| C | 1.12053300  | 4.42262800  | -0.83664800 |
| O | 1.56664100  | 1.99642800  | 1.75468800  |
| C | 1.09663100  | 2.50271400  | 0.73525800  |
| O | -0.86826500 | 1.82095700  | -2.27977900 |
| O | 1.51923500  | 5.54632300  | -1.12968500 |
| H | -0.53518200 | 5.32598100  | -2.75206100 |
| N | 0.27746700  | 3.70957800  | -1.67948600 |
| C | -0.19557100 | 2.40153300  | -1.42578100 |
| N | 1.49301000  | 3.80553400  | 0.34896300  |
| H | -0.75003900 | 3.69149300  | -3.46651200 |
| C | 0.07499200  | 1.87680400  | -0.09247400 |
| C | 2.41776200  | 4.54784800  | 1.20257100  |
| H | 3.36792100  | 4.71458800  | 0.68584200  |
| H | 2.57601100  | 3.94804100  | 2.09687000  |
| H | 1.99111900  | 5.52136400  | 1.45743700  |
| H | 0.83224500  | 4.52449000  | -3.54495000 |
| C | 4.28588600  | -1.69248100 | -0.70371500 |
| H | 4.42161800  | -1.05591500 | -1.57103300 |
| C | 0.87901600  | -0.54395800 | 0.49550800  |
| O | 2.20754600  | 0.13716000  | -1.36529000 |
| C | 0.81628200  | -1.38308100 | 1.55202000  |
| C | -0.26557300 | 0.38820000  | 0.16893200  |
| O | 1.77162100  | -2.28962500 | 1.90733000  |
| C | 2.90393300  | -2.37263300 | 1.15728500  |
| C | 3.09858000  | -1.55915300 | 0.03451600  |
| C | 2.06202100  | -0.57625100 | -0.37247000 |
| C | 3.86763000  | -3.30923500 | 1.55323000  |
| H | 3.68353200  | -3.92131400 | 2.43017900  |
| H | -0.73364300 | 0.03610600  | -0.75440400 |
| C | 5.03661700  | -3.43183100 | 0.81813300  |
| C | 5.23441400  | -2.61804600 | -0.30898400 |

|    |             |             |             |
|----|-------------|-------------|-------------|
| H  | 5.79684900  | -4.14943600 | 1.10770800  |
| H  | -0.01316600 | -1.41627100 | 2.24683900  |
| C  | -2.78303200 | 0.52501700  | 3.76309300  |
| C  | -1.32382200 | 0.60723700  | 1.26287400  |
| N  | -2.30369600 | 0.87962600  | 4.76844000  |
| C  | -2.61141600 | 0.01510800  | 1.34600600  |
| C  | -3.36514800 | 0.07387500  | 2.54572200  |
| H  | -0.87640400 | 0.88241300  | 2.21991200  |
| C  | -3.23054500 | -0.66213100 | 0.17215500  |
| C  | -3.79131200 | -1.93962600 | 0.31244800  |
| C  | -3.27265800 | -0.06759600 | -1.10372600 |
| C  | -4.37067400 | -2.61194000 | -0.76428900 |
| H  | -3.76915600 | -2.42593500 | 1.28246700  |
| C  | -3.85170300 | -0.72351900 | -2.18215200 |
| H  | -2.84035100 | 0.91331500  | -1.26423500 |
| C  | -4.40709100 | -1.99887100 | -2.02069500 |
| H  | -4.78827700 | -3.60016000 | -0.60733900 |
| H  | -3.87986800 | -0.25993500 | -3.16326500 |
| C  | -5.54861200 | -3.83904900 | -3.02432100 |
| H  | -5.92965700 | -4.09048200 | -4.01699600 |
| H  | -4.81787800 | -4.60003000 | -2.71607200 |
| H  | -6.38129200 | -3.83634500 | -2.30736700 |
| O  | -4.95623100 | -2.56047200 | -3.14507300 |
| C  | -4.74998700 | -0.24161700 | 2.62032500  |
| N  | -5.88545700 | -0.49889300 | 2.72764600  |
| Cl | 6.73007200  | -2.79361700 | -1.23001800 |
| H  | -1.12429700 | 1.92971300  | 0.68265300  |

TS<sub>2i(1,3)</sub>

Imaginary Freq = -1572.31

Charge= -1 multiplicity= 1

|   |            |             |             |
|---|------------|-------------|-------------|
| C | 0.87830200 | -4.73580900 | 2.75009000  |
| C | 1.89390600 | -4.49592700 | 0.56820800  |
| O | 1.78102500 | -1.87772100 | -1.87008400 |
| C | 1.47722300 | -2.50701200 | -0.85529800 |

O -0.31814300 -2.30074700 2.33100600  
O 2.46805100 -5.56638100 0.75006400  
H 0.52767300 -5.74624400 2.52294100  
N 1.02812600 -3.96767700 1.51691600  
C 0.35982100 -2.72576200 1.39466200  
N 2.08165600 -3.75974100 -0.59314700  
H 0.15727000 -4.20483900 3.36876100  
C 0.45694200 -2.08533900 0.08985900  
C 3.03005800 -4.30623200 -1.56035900  
H 2.72023900 -5.30999200 -1.86296100  
H 4.03011200 -4.37396500 -1.12122200  
H 3.03805500 -3.63024900 -2.41342000  
H 1.83723700 -4.81592100 3.27107200  
C 4.24535000 1.92405600 0.42966600  
H 4.61697300 1.19358200 1.13970600  
C 0.83853600 0.47037300 -0.36557700  
O 2.54734000 -0.24123700 1.14455400  
C 0.46831800 1.44775000 -1.22291800  
C -0.11447600 -0.65607200 -0.03558800  
O 1.22235800 2.53218000 -1.56561000  
C 2.46170700 2.66422300 -1.02157800  
C 2.96157800 1.73045600 -0.10593500  
C 2.14186300 0.56041900 0.30225300  
C 3.21722300 3.77846200 -1.41007500  
H 2.79738600 4.48117300 -2.12250300  
H -0.56811400 -0.45072500 0.93907600  
C 4.48438000 3.95863400 -0.87743700  
C 4.98768400 3.02435600 0.04199800  
H 5.08698200 4.81345400 -1.16551300  
H -0.49207300 1.48107500 -1.72142200  
C -3.16264900 -1.37678600 -3.20794900  
C -1.21800500 -0.96706700 -1.06024300  
N -2.85327800 -1.82292700 -4.24267000  
C -2.57468600 -0.59006900 -0.93988500  
C -3.53344500 -0.83221800 -1.94779700



H -0.84021100 -1.11624000 -2.07378700  
C -3.05400300 0.04203100 0.33200600  
C -3.25136200 1.42878900 0.38542000  
C -3.28075800 -0.73235100 1.48048400  
C -3.67937900 2.03495400 1.58638000  
C -3.71967300 -0.13224900 2.65400400  
H -3.09062000 -1.79913800 1.44778700  
C -3.92597500 1.24844600 2.71319400  
H -3.89202000 -0.73686500 3.53979900  
C -4.91402000 -0.55688300 -1.76471800  
N -6.05248400 -0.31625600 -1.64288900  
H -4.25756700 1.70241400 3.64040500  
O -2.93314800 2.19252700 -0.71404000  
O -3.80598200 3.40174200 1.55338000  
C -4.02288300 2.86029200 -1.36523100  
H -4.83495400 2.15980100 -1.58433400  
H -4.39741400 3.68768800 -0.75429200  
H -3.61399100 3.24972900 -2.30111700  
C -4.20142500 4.05717100 2.74200000  
H -3.48595200 3.88512200 3.55800600  
H -4.22494000 5.12309500 2.50380700  
H -5.20044800 3.73885100 3.07165200  
H -0.79626900 -2.26388200 -0.60446700  
Cl 6.60362300 3.27597500 0.70838700

**Table 9:** Thermodynamic parameters for Intermediates **2a-2i** [1,5]-H shift at b3lyp/6-31g (d) level of theory

| Intermediate 2        | G            | H            | S       | E            |
|-----------------------|--------------|--------------|---------|--------------|
| In <sub>2a(1,5)</sub> | -1635.152843 | -1635.055477 | 204.925 | -1635.499014 |
| In <sub>2b(1,5)</sub> | -1749.645945 | -1749.542549 | 217.615 | -1750.021444 |
| In <sub>2c(1,5)</sub> | -1864.128884 | -1864.018688 | 231.927 | -1864.532504 |
| In <sub>2d(1,5)</sub> | -2094.761620 | -2094.660705 | 212.393 | -2095.095734 |
| In <sub>2e(1,5)</sub> | -2554.367744 | -2554.262190 | 222.157 | -2554.688497 |
| In <sub>2f(1,5)</sub> | -2094.759179 | -2094.656926 | 215.210 | -2095.091712 |
| In <sub>2h(1,5)</sub> | -2209.254564 | -2209.147783 | 224.739 | -2209.618201 |
| In <sub>2i(1,5)</sub> | -2323.737784 | -2323.624043 | 239.388 | -2324.129359 |

In<sub>2a(1,5)</sub>

Charge= -1 multiplicity= 1

C -3.26333000 4.00897100 1.05982700  
C -1.83395800 3.89698900 -0.87731600  
O 0.73549100 1.63039700 -1.88281500  
C -0.24468500 2.06855000 -1.09717500  
O -2.10526900 1.68405600 1.92684700  
O -2.34610200 4.93323400 -1.29504800  
H -2.92470900 5.01675800 1.31562600  
N -2.22766900 3.30658800 0.30609600  
C -1.68150400 2.10609500 0.84864600  
N -0.81679000 3.23789300 -1.56882900  
H -3.44652600 3.42716900 1.96106600  
C -0.66350000 1.46381400 0.05846100  
C -0.31948800 3.83627300 -2.80817100  
H -0.91418600 4.72951000 -2.98758400  
H -0.42716200 3.13217500 -3.63735100  
H 0.73736700 4.09636100 -2.70518200  
H -4.17461700 4.09416400 0.46069400

C -3.18618100 -3.26830600 -1.49981600  
H -2.84045400 -2.98382700 -2.48879700  
C -1.10907800 -0.92681300 0.64151400  
O -1.23787700 -1.19498400 -1.72938400  
C -1.62835000 -1.33233000 1.82160800  
C -0.05516100 0.17909200 0.62321000  
O -2.56606900 -2.30616000 1.98939200  
C -3.06055200 -2.93253400 0.88352200  
C -2.63063200 -2.58595100 -0.40413200  
C -1.61087300 -1.52392300 -0.60023500  
C -4.01867900 -3.93294400 1.09187300  
H -4.32358300 -4.16759600 2.10686600  
H 0.17969200 0.40460000 1.66984000  
C -4.55037800 -4.59191100 -0.00759100  
C -4.13519000 -4.26103600 -1.30953300  
H -5.29477700 -5.36952200 0.14371000  
H -1.35694900 -0.89702500 2.77464800  
C 2.24835100 1.87441500 1.79961900  
C 1.21339500 -0.35499000 -0.03826600  
N 1.67602500 2.85081000 2.10300400  
C 2.50670400 -0.21307000 0.42961900  
C 2.98189400 0.72595700 1.41260300  
H 1.05522500 -1.10101500 -0.81089500  
C 3.52818100 -1.11462300 -0.20012900  
C 4.73658100 -0.60876800 -0.70584500  
C 3.28225400 -2.49086200 -0.32729400  
C 5.65876300 -1.44769100 -1.32935700  
H 4.94434600 0.45213100 -0.61089700  
C 4.20661100 -3.33364700 -0.94511800  
H 2.35881600 -2.89621500 0.07585500  
C 5.39876800 -2.81447200 -1.45187900  
H 6.58476700 -1.03183100 -1.71964500  
H 3.99649100 -4.39799500 -1.02508500  
C 4.23565400 0.56675300 2.05624000  
N 5.26219600 0.45707000 2.61005800

H 6.12167100 -3.46924800 -1.93346900  
H 1.15211700 0.84839500 -1.40037500  
H -4.55895800 -4.78409100 -2.16256900

In<sub>2b(1,5)</sub>

Charge= -1 multiplicity= 1

C 4.92172900 -2.88105300 0.60914400  
C 3.33497100 -3.17626400 -1.18047100  
O 0.09667400 -1.81235000 -1.81556800  
C 1.24158700 -1.93764800 -1.15008300  
O 3.19307700 -1.06609500 1.71109900  
O 4.09776700 -3.98729700 -1.70122000  
H 4.94161500 -3.95004900 0.83864300  
N 3.64644900 -2.52204800 -0.00621100  
C 2.81284500 -1.56997500 0.65186300  
N 2.09694500 -2.85436300 -1.73776700  
H 5.00833600 -2.29300500 1.52074400  
C 1.57013000 -1.26012600 -0.00557200  
C 1.68325900 -3.54870300 -2.95753300  
H 2.50532300 -4.20192900 -3.24260900  
H 1.47560800 -2.82642400 -3.75128700  
H 0.77857400 -4.13372900 -2.77158800  
H 5.74650400 -2.66094700 -0.07492400  
C 2.33113000 4.06962800 -1.49255700  
H 1.99519900 3.71912600 -2.46355300  
C 1.30876000 1.13170900 0.67673300  
O 1.11419900 1.49463000 -1.67720400  
C 1.78999000 1.64630600 1.83012100  
C 0.65314200 -0.24831000 0.68371100  
O 2.38996900 2.86093600 1.97439300  
C 2.55277200 3.64291100 0.86910900  
C 2.12736500 3.21540400 -0.39550400  
C 1.47512800 1.89183900 -0.56624100  
C 3.16675400 4.88842700 1.05354700  
H 3.48189100 5.17815600 2.05104000

H 0.60446500 -0.56620600 1.73164300  
C 3.35485600 5.71305600 -0.04660800  
C 2.93697800 5.30553300 -1.32575300  
H 3.83051700 6.68146400 0.08624900  
H 1.76279600 1.12064700 2.77583600  
C -0.88688100 -2.61691700 1.93837700  
C -0.77760800 -0.12033400 0.16487900  
N -0.01927400 -3.38482700 2.11346000  
C -1.91169300 -0.66311400 0.74127600  
C -1.96784100 -1.73107600 1.70712900  
H -0.93357800 0.65585100 -0.57805400  
C -3.21907000 -0.10183600 0.26996300  
C -4.28126400 -0.93100200 -0.11131700  
C -3.41294600 1.28727100 0.16696700  
C -5.48618600 -0.41096700 -0.58775900  
H -4.16272100 -2.00721000 -0.04032900  
C -4.60740000 1.82284200 -0.29918600  
H -2.61104000 1.95234500 0.47344400  
C -5.65349100 0.97426200 -0.68120000  
H -6.27854900 -1.09277800 -0.87638300  
H -4.75601300 2.89667700 -0.36688500  
C -3.12733700 -1.97948200 2.48494700  
N -4.06830300 -2.20438100 3.14595200  
H -0.48948000 -1.21344000 -1.25182300  
O -6.79556400 1.59441300 -1.12850100  
C -7.89161300 0.77646900 -1.48686700  
H -8.69116200 1.45708500 -1.79008000  
H -7.64801100 0.11114900 -2.32734800  
H -8.23804500 0.16542900 -0.64184000  
H 3.08968700 5.96012000 -2.17959400

In<sub>2</sub>e<sub>(1,5)</sub>

Charge= -1 multiplicity= 1

C 5.14428600 -2.61100400 1.18605400  
C 3.83441700 -3.00985400 -0.79765300

O 0.67506400 -1.77608500 -1.92088000  
C 1.70843400 -1.86152600 -1.08939700  
O 3.21706700 -0.83639500 1.98324600  
O 4.69559100 -3.79462200 -1.18948500  
H 5.18881400 -3.67608300 1.42917300  
N 3.94942300 -2.32614600 0.39527500  
C 2.99642900 -1.39466700 0.90724000  
N 2.67664500 -2.74826000 -1.53192100  
H 5.07148100 -2.01367000 2.09282300  
C 1.83355200 -1.17066300 0.08783600  
C 2.47956800 -3.45951800 -2.79527500  
H 3.36080400 -4.07873000 -2.94955700  
H 2.36395700 -2.74648500 -3.61568600  
H 1.58175200 -4.08148900 -2.74433700  
H 6.04408100 -2.34937400 0.62130900  
C 2.40271900 4.11782300 -1.61253200  
H 2.18921400 3.69915200 -2.59114200  
C 1.34656100 1.22763800 0.60364500  
O 1.37755600 1.45788900 -1.77380500  
C 1.67341300 1.82857100 1.76908500  
C 0.78561600 -0.19118000 0.62185600  
O 2.18294300 3.08478900 1.90446600  
C 2.40868100 3.82141900 0.77928900  
C 2.14105700 3.30614600 -0.49576500  
C 1.59380100 1.93476400 -0.65670500  
C 2.92369200 5.11227800 0.95461800  
H 3.11722700 5.47025900 1.96092200  
H 0.65711000 -0.45889500 1.67596300  
C 3.17189900 5.89343700 -0.16518000  
C 2.91181800 5.39782000 -1.45494800  
H 3.57142300 6.89659600 -0.03937300  
H 1.57808000 1.34980000 2.73513000  
C -0.71680600 -2.53958100 2.02542100  
C -0.58509600 -0.21336200 -0.05696900  
N 0.14865100 -3.00519200 2.66269100

|   |             |             |             |
|---|-------------|-------------|-------------|
| C | -1.68750600 | -0.95379700 | 0.31856800  |
| C | -1.79763800 | -2.02584600 | 1.26539300  |
| H | -0.77615100 | 0.60389400  | -0.74535400 |
| C | -2.94836300 | -0.62287200 | -0.43796200 |
| C | -3.17545600 | -1.19297200 | -1.70060500 |
| C | -3.88645200 | 0.27578500  | 0.08398500  |
| C | -4.31581200 | -0.87495700 | -2.42783400 |
| H | -2.45009500 | -1.89877700 | -2.09452100 |
| C | -5.03747600 | 0.60868600  | -0.66516700 |
| C | -5.25236400 | 0.02824600  | -1.91636200 |
| H | -4.48575500 | -1.32615500 | -3.40210100 |
| C | -3.04223300 | -2.66306400 | 1.49616500  |
| N | -4.06690500 | -3.18839600 | 1.71661000  |
| H | -0.00685900 | -1.19082200 | -1.44970300 |
| H | -6.13527000 | 0.27423200  | -2.49616300 |
| O | -3.64571200 | 0.88499700  | 1.29075000  |
| O | -5.87945600 | 1.52634900  | -0.08390700 |
| C | -4.49236300 | 0.48049400  | 2.37408700  |
| H | -5.50951100 | 0.86772500  | 2.24520300  |
| H | -4.51761400 | -0.61006000 | 2.46542000  |
| H | -4.04819000 | 0.91361300  | 3.27436600  |
| C | -7.04584300 | 1.89071600  | -0.79130100 |
| H | -7.56503000 | 2.61825600  | -0.16265900 |
| H | -6.80818300 | 2.35585300  | -1.75878600 |
| H | -7.70572500 | 1.02890100  | -0.96592600 |
| H | 3.11009900  | 6.01909900  | -2.32419600 |

In<sub>2</sub>d(1,5)

Charge= -1 multiplicity= 1

|   |             |            |             |
|---|-------------|------------|-------------|
| C | 0.23034300  | 5.29295400 | -0.94851600 |
| C | -0.72112000 | 4.35890900 | 1.05942600  |
| O | -1.67163900 | 1.04608600 | 1.99397800  |
| C | -1.13920200 | 1.96653400 | 1.19499200  |
| O | 0.31020500  | 2.75411700 | -1.97305500 |
| O | -0.75713900 | 5.48615100 | 1.54697500  |

H -0.59569200 5.99854300 -1.07270500  
N -0.21889400 4.11910100 -0.20356700  
C -0.14406900 2.84084400 -0.82975500  
N -1.18381800 3.23536200 1.74621700  
H 0.57846000 4.93805500 -1.91654600  
C -0.60413600 1.72595600 -0.04339000  
C -1.77273200 3.42631200 3.07245100  
H -1.69151900 4.48629900 3.30375300  
H -1.23410900 2.83072900 3.81402000  
H -2.82103400 3.11622400 3.06887500  
H 1.03577700 5.79809400 -0.40754000  
C 4.12093900 -1.12433600 0.78012900  
H 3.81113800 -1.11824800 1.81934800  
C 0.90904400 -0.06076200 -0.92079900  
O 1.45236800 -0.36346900 1.38823600  
C 1.41129900 -0.07109400 -2.17578300  
C -0.54695000 0.34509000 -0.69822700  
O 2.68360600 -0.41474200 -2.52498800  
C 3.55648300 -0.76210700 -1.54012500  
C 3.17496200 -0.76199400 -0.19279300  
C 1.79104200 -0.38665000 0.20332400  
C 4.85487500 -1.11591500 -1.92945900  
H 5.11484800 -1.10274400 -2.98294500  
H -0.98892500 0.47593400 -1.69257700  
C 5.78008500 -1.47306500 -0.96074700  
C 5.40129800 -1.47340400 0.39136200  
H 6.79102000 -1.75035900 -1.23986700  
H 0.84300700 0.21977600 -3.04946000  
C -3.50320400 0.66646500 -1.52624100  
C -1.28100100 -0.80037800 -0.00487900  
N -3.54191000 1.81254500 -1.76663700  
C -2.51008900 -1.32344800 -0.36429200  
C -3.50410200 -0.71414800 -1.20831400  
H -0.67805000 -1.39734800 0.67232900  
C -2.85106700 -2.65508700 0.23816600



|    |             |             |             |
|----|-------------|-------------|-------------|
| C  | -4.08083300 | -2.87303100 | 0.87995400  |
| C  | -1.92719600 | -3.71130200 | 0.20133100  |
| C  | -4.36956600 | -4.09960200 | 1.47585800  |
| H  | -4.80797400 | -2.06814000 | 0.91312600  |
| C  | -2.21659700 | -4.94205200 | 0.79112600  |
| H  | -0.97967800 | -3.55969400 | -0.30743200 |
| C  | -3.43921600 | -5.14043900 | 1.43408300  |
| H  | -5.32583800 | -4.24289400 | 1.97350900  |
| H  | -1.48739100 | -5.74778800 | 0.74310800  |
| C  | -4.56862200 | -1.46226700 | -1.77328200 |
| N  | -5.45332200 | -2.05533300 | -2.26088200 |
| H  | -3.66779300 | -6.09902700 | 1.89450800  |
| H  | -1.68947000 | 0.18903300  | 1.46070100  |
| Cl | 6.59621200  | -1.93207100 | 1.60688800  |

In<sub>2e(1,5)</sub>

Charge= -1 multiplicity= 1

|   |             |             |             |
|---|-------------|-------------|-------------|
| C | 0.90391900  | 5.39073400  | -1.12030400 |
| C | -0.10327000 | 4.61482600  | 0.92788600  |
| O | -1.33165700 | 1.43143100  | 1.98727000  |
| C | -0.74147200 | 2.27693900  | 1.14820500  |
| O | 0.74174800  | 2.82122600  | -2.05661000 |
| O | -0.02503100 | 5.75482400  | 1.37947700  |
| H | 0.15260600  | 6.17459800  | -1.24846600 |
| N | 0.35156400  | 4.28994200  | -0.33399900 |
| C | 0.30029500  | 2.98995600  | -0.91824300 |
| N | -0.65609400 | 3.56129200  | 1.65848100  |
| H | 1.19287400  | 4.97597000  | -2.08399900 |
| C | -0.26596200 | 1.95225500  | -0.09579400 |
| C | -1.18550800 | 3.84444700  | 2.99312300  |
| H | -0.99540100 | 4.89725200  | 3.19104000  |
| H | -0.68642800 | 3.21869500  | 3.73746600  |
| H | -2.25885500 | 3.63898300  | 3.02669700  |
| H | 1.76920300  | 5.82370900  | -0.60981400 |
| C | 4.10106400  | -1.36862100 | 0.90555600  |

H 3.77706000 -1.29601900 1.93786500  
C 1.05268900 -0.01892600 -0.88969300  
O 1.52082500 -0.30183600 1.43716100  
C 1.56944800 -0.12578800 -2.13405200  
C -0.35054900 0.55219200 -0.70646200  
O 2.80270100 -0.61436800 -2.44713000  
C 3.61647400 -1.02251700 -1.43520700  
C 3.21574100 -0.93804500 -0.09616200  
C 1.87521700 -0.40195200 0.26074200  
C 4.87497200 -1.52644500 -1.78824800  
H 5.15152400 -1.57580300 -2.83641700  
H -0.75754700 0.70112200 -1.71243700  
C 5.74048500 -1.94968800 -0.79135600  
C 5.34228500 -1.86561300 0.55251100  
H 6.71970100 -2.34331100 -1.04223900  
H 1.04841800 0.19299400 -3.02729500  
C -3.24219100 1.14369400 -1.72144300  
C -1.22513100 -0.46992700 0.02016500  
N -3.07955100 2.18209900 -2.23770000  
C -2.53828700 -0.78555100 -0.27051500  
C -3.49220500 -0.10068600 -1.08957200  
H -0.68988000 -1.18221400 0.64036900  
C -3.06546200 -1.99513300 0.45325800  
C -3.85369400 -1.82145400 1.60170000  
C -2.78932700 -3.31242100 0.06308400  
C -4.33263700 -2.90406600 2.33509100  
H -4.08862700 -0.80638100 1.90854600  
C -3.26496600 -4.41034400 0.78259200  
C -4.03640500 -4.20417100 1.92408800  
H -4.93783500 -2.73260200 3.22128000  
H -3.03038700 -5.41339900 0.44153100  
C -4.79261800 -0.63092700 -1.29705800  
N -5.87121800 -1.04650300 -1.48363300  
H -1.43326900 0.56201200 1.47490900  
H -4.40632200 -5.05912300 2.48443300

Cl -1.83093400 -3.64234100 -1.38153300  
Cl 6.46117700 -2.41007800 1.80446100

In<sub>2r(1,5)</sub>

Charge= -1 multiplicity= 1

C 3.91525300 -3.64657200 1.22760600  
C 2.52114000 -3.75278600 -0.73593400  
O -0.25218100 -1.80383600 -1.86501500  
C 0.74392600 -2.11880600 -1.04239300  
O 2.49915700 -1.43046300 1.99232800  
O 3.15412500 -4.73650700 -1.11295700  
H 3.69555500 -4.68329500 1.49649800  
N 2.81972600 -3.09031100 0.43707000  
C 2.13581500 -1.93930700 0.93053200  
N 1.45386800 -3.22948900 -1.46778500  
H 4.00467900 -3.02994000 2.11982900  
C 1.05766100 -1.44887900 0.11118400  
C 1.06606000 -3.90245900 -2.70780600  
H 1.76462000 -4.72394100 -2.85260300  
H 1.11620800 -3.20450600 -3.54753900  
H 0.04366000 -4.28208800 -2.62971900  
H 4.84495700 -3.63036300 0.65110000  
C 2.94006900 3.48413000 -1.70337000  
H 2.61858900 3.11481000 -2.67227200  
C 1.20045600 1.00415900 0.57738600  
O 1.26411800 1.17409700 -1.80416700  
C 1.67903600 1.52478200 1.72902600  
C 0.29722100 -0.22486500 0.62592000  
O 2.49237200 2.61188000 1.83572800  
C 2.88982700 3.24373900 0.69428900  
C 2.48889400 2.78874200 -0.56872000  
C 1.60757800 1.60064500 -0.69838800  
C 3.71900000 4.36317700 0.84068200  
H 4.00576900 4.67981000 1.83853600  
H 0.10821300 -0.42966300 1.68532700

|    |             |             |             |
|----|-------------|-------------|-------------|
| C  | 4.14941600  | 5.03235000  | -0.29628200 |
| C  | 3.76076300  | 4.59414500  | -1.57447200 |
| H  | 4.79305100  | 5.90229200  | -0.19308200 |
| H  | 1.47312000  | 1.10527700  | 2.70530600  |
| C  | -1.75832800 | -2.11672100 | 2.03023500  |
| C  | -1.03701300 | 0.09395200  | -0.04926100 |
| N  | -1.03434500 | -2.83483300 | 2.60605800  |
| C  | -2.29139900 | -0.30393100 | 0.36879600  |
| C  | -2.67559700 | -1.28780900 | 1.33636000  |
| H  | -1.01020700 | 0.90393400  | -0.77152300 |
| C  | -3.43042800 | 0.34606100  | -0.36974500 |
| C  | -4.05511500 | -0.34640100 | -1.41887300 |
| C  | -3.89807100 | 1.63726000  | -0.09113500 |
| C  | -5.08574600 | 0.22144500  | -2.16371300 |
| H  | -3.71294600 | -1.35372800 | -1.63797500 |
| C  | -4.93327800 | 2.22140300  | -0.82370500 |
| C  | -5.52642700 | 1.51126000  | -1.86511000 |
| H  | -5.54498900 | -0.34280400 | -2.97106100 |
| H  | -5.26642600 | 3.22261500  | -0.57048600 |
| C  | -4.04246500 | -1.51428900 | 1.64491900  |
| N  | -5.16261700 | -1.72096800 | 1.91657400  |
| H  | -0.75816900 | -1.05398300 | -1.40829300 |
| H  | 4.10416800  | 5.12666100  | -2.45729500 |
| H  | -6.33240600 | 1.96625100  | -2.43542600 |
| Cl | -3.19847600 | 2.58434900  | 1.22304400  |

In<sub>2h(1,5)</sub>

Charge= -1 multiplicity= 1

|   |             |            |             |
|---|-------------|------------|-------------|
| C | 3.38709900  | 4.67448900 | -0.47220600 |
| C | 1.91901800  | 4.23647600 | 1.38841900  |
| O | -0.66480800 | 1.83439300 | 1.94086100  |
| C | 0.33156500  | 2.39770100 | 1.26379000  |
| O | 2.25281300  | 2.53066800 | -1.74430500 |
| O | 2.41835800  | 5.18761500 | 1.98501200  |
| H | 3.04840000  | 5.71016300 | -0.56384400 |

N 2.33935300 3.85401400 0.13073400  
C 1.80800400 2.76325000 -0.61767000  
N 0.89033300 3.46981800 1.93781300  
H 3.59311800 4.25188400 -1.45364000  
C 0.77841400 1.99531400 0.03236400  
C 0.36459500 3.85151700 3.24921300  
H 0.95463200 4.69939200 3.59075900  
H 0.45378200 3.01669500 3.94911100  
H -0.68972000 4.12900400 3.16790900  
H 4.28448600 4.66024400 0.15309000  
C 3.31664200 -2.91826400 0.75517600  
H 2.96641100 -2.82125100 1.77687900  
C 1.24333200 -0.25244400 -0.95837200  
O 1.36088700 -0.93979300 1.32916900  
C 1.77457700 -0.43809600 -2.18744500  
C 0.18182700 0.82732900 -0.75433800  
O 2.72096100 -1.36215000 -2.51846200  
C 3.21102200 -2.16989900 -1.53880000  
C 2.77031600 -2.06105600 -0.21411700  
C 1.73964000 -1.05635900 0.16204400  
C 4.17862200 -3.11279400 -1.90929700  
H 4.49695200 -3.16703300 -2.94532000  
H -0.04676600 1.23073000 -1.74753900  
C 4.71018900 -3.95464100 -0.94453700  
C 4.27126200 -3.84778200 0.38499100  
H 5.46062200 -4.69186000 -1.20932200  
H 1.50827000 0.15845300 -3.05004500  
C -2.12134100 2.67781900 -1.64277600  
C -1.08803200 0.17840800 -0.20788800  
N -1.56009700 3.70151300 -1.74278400  
C -2.37505000 0.37626900 -0.67617400  
C -2.84038100 1.46616800 -1.49488300  
H -0.93078400 -0.68317800 0.43375400  
C -3.39369300 -0.63342600 -0.24189800  
C -4.63785100 -0.24859000 0.27300900

|    |             |             |             |
|----|-------------|-------------|-------------|
| C  | -3.11947900 | -2.01105700 | -0.31098800 |
| C  | -5.57319900 | -1.18637900 | 0.71428800  |
| H  | -4.87940900 | 0.80729800  | 0.33661000  |
| C  | -4.04065200 | -2.95879700 | 0.11769300  |
| H  | -2.16887700 | -2.33630600 | -0.72317400 |
| C  | -5.27605100 | -2.55063500 | 0.63523100  |
| H  | -6.52149000 | -0.84061000 | 1.11065300  |
| H  | -3.82843700 | -4.02201300 | 0.05249400  |
| C  | -4.06989500 | 1.40487600  | -2.19928200 |
| N  | -5.07668400 | 1.38036900  | -2.79790700 |
| H  | -1.06841100 | 1.14506900  | 1.32179100  |
| Cl | 4.96220800  | -4.93029000 | 1.59592600  |
| O  | -6.12137100 | -3.55800400 | 1.03289700  |
| C  | -7.39509300 | -3.19299700 | 1.52661600  |
| H  | -7.90711500 | -4.12871400 | 1.76446900  |
| H  | -7.32085400 | -2.58221500 | 2.43751000  |
| H  | -7.97986200 | -2.64106100 | 0.77776300  |

In<sub>2</sub>i (1, 5)

Charge= -1 multiplicity= 1

|   |             |             |             |
|---|-------------|-------------|-------------|
| C | -3.70072300 | -4.52301400 | -1.06790400 |
| C | -2.47756800 | -4.25300200 | 0.99180200  |
| O | 0.06437400  | -1.96917700 | 2.03542900  |
| C | -0.83210100 | -2.47115500 | 1.19280900  |
| O | -2.35670900 | -2.34166900 | -2.03672400 |
| O | -3.08224900 | -5.21568200 | 1.45843300  |
| H | -3.39915700 | -5.56941900 | -1.16524900 |
| N | -2.71072000 | -3.78614800 | -0.28581800 |
| C | -2.05498600 | -2.67122100 | -0.88809300 |
| N | -1.51121600 | -3.55693000 | 1.72017200  |
| H | -3.74930600 | -4.04576600 | -2.04471200 |
| C | -1.07976100 | -1.99803000 | -0.06998300 |
| C | -1.19660200 | -4.01635800 | 3.07350400  |
| H | -1.85391300 | -4.85795600 | 3.28180000  |
| H | -1.36489900 | -3.21155400 | 3.79373500  |

H -0.15001300 -4.32666700 3.13473600  
H -4.67554500 -4.49076100 -0.57233700  
C -3.38646600 3.00068400 0.82249800  
H -3.14062000 2.80419800 1.86023600  
C -1.31507300 0.34558800 -0.90918100  
O -1.61566200 0.85637500 1.40676900  
C -1.71421600 0.65828600 -2.16203600  
C -0.34439400 -0.81275400 -0.69926000  
O -2.57374600 1.66127100 -2.50002600  
C -3.10692800 2.42268800 -1.50591100  
C -2.80078500 2.18591300 -0.16017800  
C -1.87107800 1.09003600 0.22389300  
C -3.97969300 3.45123500 -1.88396500  
H -4.19453300 3.60432500 -2.93659300  
H -0.05359100 -1.15497400 -1.69797000  
C -4.55118800 4.25032400 -0.90573300  
C -4.24693200 4.01514900 0.44468000  
H -5.22956400 5.05247600 -1.17615800  
H -1.39755400 0.11568300 -3.04312700  
C 1.92408900 -2.68970900 -1.72287700  
C 0.90541200 -0.31228600 0.02681800  
N 1.29831400 -3.48545600 -2.31192000  
C 2.21191400 -0.68702000 -0.21609700  
C 2.72715500 -1.76260800 -1.01181300  
H 0.77399400 0.59453000 0.60886700  
C 3.24174100 0.12253100 0.52920100  
C 3.55506400 -0.19912300 1.85923200  
C 3.86908600 1.21873400 -0.07459200  
C 4.47710600 0.55646300 2.57289300  
H 3.07394200 -1.05797900 2.31788400  
C 4.79520500 1.99389900 0.65911800  
C 5.10108300 1.65752100 1.97893600  
H 4.71758600 0.29653800 3.60060000  
C 4.12397000 -1.97372300 -1.12724500  
N 5.27579800 -2.15152700 -1.25284600

|    |             |             |             |
|----|-------------|-------------|-------------|
| H  | 0.56732100  | -1.26057000 | 1.50977800  |
| H  | 5.81375800  | 2.24407900  | 2.54831000  |
| Cl | -4.98672500 | 5.04536100  | 1.67270500  |
| O  | 3.52575400  | 1.57750500  | -1.35484000 |
| O  | 5.33022900  | 3.06910400  | -0.00846200 |
| C  | 4.53033300  | 1.36131700  | -2.35405200 |
| H  | 5.35535100  | 2.07426600  | -2.24416500 |
| H  | 4.91421000  | 0.33717500  | -2.30833100 |
| H  | 4.03280500  | 1.52390700  | -3.31398300 |
| C  | 6.26295600  | 3.87505700  | 0.68067700  |
| H  | 6.55854000  | 4.66009700  | -0.01955600 |
| H  | 5.82072500  | 4.33791900  | 1.57448500  |
| H  | 7.15388600  | 3.30540200  | 0.98117900  |



**Table 10:** Thermodynamic parameters for intermediates **2a-2i** [1,3]-H shift at b3lyp/6-31g (d) level of theory

| Intermediate 2        | G            | H            | S       | E            |
|-----------------------|--------------|--------------|---------|--------------|
| In <sub>2a(1,3)</sub> | -1635.156778 | -1635.056407 | 211.249 | -1635.500389 |
| In <sub>2b(1,3)</sub> | -1749.649167 | -1749.542906 | 223.643 | -1750.022272 |
| In <sub>2c(1,3)</sub> | -1864.135459 | -1864.023456 | 235.730 | -1864.538006 |
| In <sub>2d(1,3)</sub> | -2094.752645 | -2094.648799 | 218.564 | -2095.083950 |
| In <sub>2e(1,3)</sub> | -2554.370697 | -2554.264306 | 223.919 | -2554.691286 |
| In <sub>2f(1,3)</sub> | -2094.763138 | -2094.659956 | 217.165 | -2095.095410 |
| In <sub>2h(1,3)</sub> | -2209.256884 | -2209.147304 | 230.630 | -2209.618170 |
| In <sub>2i(1,3)</sub> | -2323.743651 | -2323.628063 | 243.276 | -2324.134102 |

In<sub>2a(1,3)</sub>

Charge= -1 multiplicity= 1

C 3.12239700 -2.73948900 1.95769900  
C 2.79883000 -2.52180900 -0.44122100  
O -0.12864300 -2.27921100 -2.44318400  
C 0.55945800 -2.21587300 -1.44284500  
O 0.39104600 -2.49105600 2.21571600  
O 4.00819100 -2.66720800 -0.55426100  
H 3.57516300 -3.73234000 1.88464800  
N 2.21140800 -2.50751900 0.83462900  
C 0.84525500 -2.36355300 1.08695700  
N 1.94569600 -2.41355000 -1.52798900  
H 2.53313000 -2.66180000 2.86920600  
C -0.01645700 -1.94751900 -0.07650600  
C 2.51820800 -2.44217300 -2.87601800  
H 3.58986700 -2.60171800 -2.78186000  
H 2.31098800 -1.48780700 -3.36506900  
H 2.05644200 -3.24577600 -3.45405900  
H 3.92129900 -1.99520600 1.94469200

C 3.53730200 2.55835600 -0.83258800  
H 3.56867800 2.19582800 -1.85504600  
C 0.63019900 0.52703300 0.52049400  
O 1.70637000 0.51039400 -1.60862500  
C 0.69848300 1.02781900 1.77743100  
C -0.50624500 -0.42311700 0.17108400  
O 1.58409800 1.96131000 2.22172500  
C 2.50247700 2.46014200 1.34270700  
C 2.56390200 2.00739900 0.01832500  
C 1.62527000 0.96743400 -0.46704300  
C 3.38201900 3.43659600 1.82564200  
H 3.29864200 3.75819200 2.85893300  
H -1.09664200 -0.53903600 1.08357300  
C 4.33240100 3.96586600 0.96390300  
C 4.41282700 3.52833900 -0.36981400  
H 5.01817800 4.72676800 1.32743100  
H 0.02389100 0.73835100 2.57491900  
C -2.85416400 1.77638500 -2.85197600  
C -1.37505800 0.15218100 -0.90351400  
N -2.33015700 2.25342400 -3.78551100  
C -2.70127300 0.46361500 -0.74476800  
C -3.47249600 1.21042600 -1.71267700  
H -0.88436400 0.42861800 -1.83038400  
C -3.43119400 0.05249100 0.49961600  
C -3.84582800 1.00816200 1.43973400  
C -3.71500900 -1.29730200 0.75449900  
C -4.50403700 0.62416700 2.60790900  
H -3.65036300 2.05804500 1.24109500  
C -4.37730700 -1.68448300 1.92117500  
H -3.42393700 -2.04168400 0.01797000  
C -4.77071300 -0.72465100 2.85435800  
H -4.81523000 1.38070700 3.32491500  
H -4.58876500 -2.73664100 2.09791500  
C -4.86878400 1.39337200 -1.59073700  
N -6.02624500 1.56353000 -1.50603300

H -5.28683300 -1.02386300 3.76384900  
H 5.15966600 3.95255100 -1.03497000  
H -0.94601200 -2.51709000 -0.01537800

In<sub>2b</sub>(1,3)

Charge= -1 multiplicity= 1

C 2.96553200 -3.29999600 1.61547600  
C 3.15836200 -2.50050600 -0.67146600  
O 0.72501000 -1.55651200 -3.08495600  
C 1.18930700 -1.78754100 -1.98530100  
O 0.24945100 -2.90010600 1.38688100  
O 4.35967500 -2.71130600 -0.57729800  
H 3.40494600 -4.27505100 1.38741500  
N 2.31721400 -2.73992800 0.42764300  
C 0.93362900 -2.54906500 0.43549700  
N 2.55562800 -2.07219400 -1.84358900  
H 2.19823200 -3.40282500 2.38018900  
C 0.34751600 -1.80408600 -0.73546500  
C 3.39708600 -1.82827100 -3.01754200  
H 4.41980600 -2.09131500 -2.75749800  
H 3.32612800 -0.77203000 -3.28632700  
H 3.04284100 -2.43312500 -3.85529200  
H 3.76276200 -2.63300300 1.95042100  
C 4.11074700 2.45164300 0.36502400  
H 4.34773500 2.33756100 -0.68790000  
C 0.92464800 0.39867900 0.57120900  
O 2.42893800 0.79330600 -1.23796100  
C 0.73984100 0.58302900 1.90056200  
C -0.13987000 -0.34784800 -0.22034000  
O 1.53774700 1.31284000 2.72780800  
C 2.63552600 1.92924700 2.19894300  
C 2.96345900 1.79593400 0.84340700  
C 2.11963400 0.97652600 -0.05925000  
C 3.42058800 2.69214900 3.07188600  
H 3.12933100 2.76818800 4.11470900

H -0.91368200 -0.62712700 0.49936800  
C 4.54708800 3.33118300 2.57332800  
C 4.89589100 3.21336900 1.21644000  
H 5.16190800 3.92860900 3.24154300  
H -0.09603900 0.16847700 2.45214400  
C -1.68991600 2.74131200 -2.95228400  
C -0.74315600 0.53605400 -1.26701600  
N -0.95451800 3.39294400 -3.59132400  
C -2.05925700 0.92308900 -1.29337000  
C -2.56729400 1.96100100 -2.16353700  
H -0.05747100 0.98284800 -1.97870900  
C -3.05947400 0.28832800 -0.37502800  
C -3.69375300 1.02798700 0.62915000  
C -3.40314800 -1.06870700 -0.49775100  
C -4.62052600 0.44576600 1.49779200  
H -3.46216300 2.08427700 0.72956000  
C -4.32634800 -1.66477200 0.35481900  
H -2.94880800 -1.65542900 -1.29164200  
C -4.93998400 -0.90868300 1.36016600  
H -5.08818800 1.05746300 2.26165400  
H -4.59377900 -2.71251900 0.25386300  
C -6.52333000 -0.84593500 3.14512800  
H -7.19637000 -1.55229500 3.63775200  
H -5.83483000 -0.42588200 3.89256400  
H -7.11385600 -0.02740600 2.71033900  
O -5.83842600 -1.58339900 2.15346800  
C -3.94789800 2.23500700 -2.29328800  
N -5.08784600 2.48633300 -2.40956400  
H 5.77873300 3.72087100 0.83803000  
H -0.58913400 -2.29832100 -1.00103800

In<sub>2c(1,3)</sub>

Charge= -1 multiplicity= 1

C -3.24784400 1.06895600 3.34179600  
C -3.33351700 2.24922100 1.21774100

O -0.78908700 3.36993300 -1.01188100  
C -1.30819600 2.73577500 -0.11406100  
O -0.50782100 1.00720700 3.03209600  
O -4.54581300 2.32125000 1.36421700  
H -3.68738700 1.88995700 3.91597000  
N -2.54265500 1.58231400 2.16630600  
C -1.15287900 1.46303700 2.09818300  
N -2.68218500 2.85895700 0.15987900  
H -2.51611700 0.53873400 3.94830000  
C -0.51077200 1.82319900 0.78404700  
C -3.52857100 3.54795400 -0.81567200  
H -4.21119500 4.22541000 -0.29983900  
H -4.10484700 2.81294000 -1.38384000  
H -2.86556800 4.09433400 -1.48333700  
H -4.05173000 0.40115300 3.02561900  
C -4.24486900 -1.84194100 -1.56212000  
H -4.51946300 -0.95808600 -2.12892500  
C -1.01088000 -0.65415500 0.02775100  
O -2.54584200 0.44826300 -1.42517500  
C -0.76183100 -1.80673500 0.69602600  
C 0.02597700 0.45742500 0.09255100  
O -1.54101600 -2.92203500 0.67719200  
C -2.68139300 -2.91353800 -0.07247800  
C -3.05844400 -1.78449600 -0.81088100  
C -2.22121800 -0.56129800 -0.79432300  
C -3.45601600 -4.08005800 -0.06909700  
H -3.12509700 -4.93179500 0.51669300  
H 0.76316500 0.13769600 0.83090300  
C -4.62286500 -4.11066100 -0.81967300  
C -5.02149600 -2.99014300 -1.56969800  
H -5.23063700 -5.01181900 -0.82603000  
H 0.12719000 -1.97329000 1.29142500  
C 1.94626500 0.79352400 -3.88844300  
C 0.70293700 0.64002600 -1.22776600  
N 1.30630300 0.87820700 -4.86677200

C 2.05704800 0.59507300 -1.40808600  
C 2.70686000 0.67732000 -2.70211700  
H 0.06462400 0.78280800 -2.09361600  
C 2.98384300 0.50421400 -0.22721800  
C 3.17690800 -0.68788000 0.48115600  
C 3.69191300 1.64839500 0.18172000  
C 4.06609000 -0.74083800 1.57625800  
C 4.55840500 1.59973600 1.26586400  
H 3.55298600 2.56964700 -0.37509500  
C 4.75270700 0.40793400 1.97167800  
H 5.09757100 2.49283700 1.57145200  
C 4.10949400 0.59955800 -2.85039300  
N 5.27219100 0.52839700 -2.99344600  
H 5.43589900 0.38486200 2.81350900  
O 2.46183000 -1.82852100 0.17609600  
O 4.18242700 -1.96599600 2.18376600  
C 3.02753000 -2.62004700 -0.87329400  
H 3.12189700 -2.03991000 -1.79686700  
H 4.01069800 -3.00937000 -0.57849600  
H 2.33809400 -3.45400200 -1.03110400  
C 5.06353800 -2.06968800 3.28247600  
H 4.76218700 -1.41378500 4.11181000  
H 5.01243100 -3.11016000 3.61279300  
H 6.09942600 -1.83103300 3.00151200  
H -5.93646400 -3.02729900 -2.15431600  
H 0.41700700 2.35501800 1.00767600

In<sub>2d</sub> (1,3)

Charge= -1 multiplicity= 1

C -1.97073200 -4.56792900 2.15702400  
C -1.16899000 -4.47753900 -0.13807000  
O 0.49014700 -1.88164100 -1.90218500  
C -0.28919800 -2.38104200 -1.12138800  
O -1.43614600 -1.87254100 2.28053800  
O -1.34193000 -5.68460100 -0.20617000

H -2.77817300 -5.22623900 1.83365800  
N -1.51448300 -3.76504700 1.01787200  
C -1.32970500 -2.38899600 1.18075700  
N -0.56847600 -3.76281800 -1.16868100  
H -2.31231400 -3.87795700 2.92592400  
C -1.11845600 -1.60579500 -0.11136900  
C -0.04361400 -4.55058800 -2.28907500  
H -0.82215100 -5.22437500 -2.64863200  
H 0.81967800 -5.14600200 -1.97563700  
H 0.25781400 -3.85103500 -3.06627800  
H -1.15470700 -5.18329600 2.54799200  
C 4.20627600 1.10661600 -0.71247200  
H 4.01463500 1.28665400 -1.76460300  
C 0.73344000 0.11729500 0.45857900  
O 1.57522400 0.85046600 -1.67877500  
C 1.09041100 -0.04113000 1.75611900  
C -0.74876000 -0.10011100 0.10732000  
O 2.33441700 0.12964400 2.28959300  
C 3.35057100 0.49540900 1.45711000  
C 3.12436300 0.72531500 0.09695300  
C 1.76066400 0.57995600 -0.50038100  
C 4.62386000 0.63567600 2.02227100  
H 4.75812600 0.45088200 3.08327300  
H -1.30114100 0.15424200 1.01473100  
C 5.68633500 1.00941300 1.21286000  
C 5.46485100 1.24141800 -0.15343700  
H 6.68217800 1.12367400 1.62761900  
H 0.39018600 -0.33657600 2.52814900  
C -2.93332800 1.64483300 -3.27042700  
C -1.30925100 0.74453600 -1.01216900  
N -2.85537400 1.13186000 -4.32243900  
C -2.30655500 1.67182600 -0.86403300  
C -3.03791600 2.23025200 -1.98860400  
H -0.97618700 0.50020600 -2.01452600  
C -2.71810700 2.14604000 0.49639000

|    |             |             |             |
|----|-------------|-------------|-------------|
| C  | -1.78503500 | 2.72627700  | 1.37034800  |
| C  | -4.04768000 | 2.02917500  | 0.93300000  |
| C  | -2.16109400 | 3.15841400  | 2.64346500  |
| H  | -0.75929900 | 2.84552100  | 1.03307200  |
| C  | -4.42548600 | 2.45585000  | 2.20523000  |
| H  | -4.78389000 | 1.60310500  | 0.25813300  |
| C  | -3.48339900 | 3.02159600  | 3.06771900  |
| H  | -1.42091400 | 3.61062000  | 3.30035700  |
| H  | -5.46079300 | 2.35194800  | 2.52241000  |
| C  | -3.84473700 | 3.38420300  | -1.87697700 |
| N  | -4.52807700 | 4.33532600  | -1.80135600 |
| Cl | 6.83120000  | 1.71558200  | -1.16459000 |
| H  | -3.77998700 | 3.36019500  | 4.05807700  |
| H  | -2.12463000 | -1.57813500 | -0.56792700 |

In<sub>2</sub>e<sup>(1,3)</sup>

Charge= -1 multiplicity= 1

|   |             |             |             |
|---|-------------|-------------|-------------|
| C | -2.02806600 | 3.62053100  | 2.06747900  |
| C | -1.91496700 | 3.30115600  | -0.33926500 |
| O | 0.72782200  | 2.28587500  | -2.49029200 |
| C | 0.10743000  | 2.41706100  | -1.45270100 |
| O | 0.55508000  | 2.66893600  | 2.18409800  |
| O | -3.05043200 | 3.75348100  | -0.38967900 |
| H | -2.21217700 | 4.69606200  | 1.99441800  |
| N | -1.27604500 | 3.14894900  | 0.90248700  |
| C | 0.01986800  | 2.65949200  | 1.08335100  |
| N | -1.18629200 | 2.95954000  | -1.46782500 |
| H | -1.42609100 | 3.40153900  | 2.94714500  |
| C | 0.67490600  | 2.02803200  | -0.11438100 |
| C | -1.81033600 | 3.12232900  | -2.78322100 |
| H | -2.80232100 | 3.54239100  | -2.63404300 |
| H | -1.87315200 | 2.14442600  | -3.26544000 |
| H | -1.19911400 | 3.78412100  | -3.40112100 |
| H | -2.99187000 | 3.10955000  | 2.11662300  |
| C | -3.96195600 | -1.38961700 | -0.53228000 |



H -3.97089700 -1.04656900 -1.56074600  
C -0.54123300 -0.19990800 0.58716500  
O -1.70783100 0.05926300 -1.47942100  
C -0.65411600 -0.65308600 1.85902500  
C 0.77377300 0.42278400 0.14693800  
O -1.72443100 -1.31135100 2.38222300  
C -2.79778300 -1.55397900 1.57797300  
C -2.82554100 -1.11882000 0.24768100  
C -1.67573800 -0.37595900 -0.32795400  
C -3.87465900 -2.25041100 2.13997600  
H -3.81697500 -2.57361600 3.17420200  
H 1.42689600 0.40649900 1.02327800  
C -4.99041600 -2.51392600 1.36064800  
C -5.02351200 -2.07851000 0.02576600  
H -5.83558300 -3.05374700 1.77407400  
H 0.12619400 -0.55145300 2.60327700  
C 2.52630100 -2.09731300 -3.05598100  
C 1.40310000 -0.36385400 -0.95539800  
N 1.87194400 -2.49280100 -3.94374400  
C 2.70242000 -0.79587500 -0.94930000  
C 3.29914400 -1.61869400 -1.97267400  
H 0.77496000 -0.61962700 -1.80156000  
C 3.63349200 -0.35619900 0.14394400  
C 3.77756100 -1.01294800 1.37359400  
C 4.43254200 0.78089000 -0.06460100  
C 4.66388300 -0.56572200 2.35521000  
C 5.32296300 1.24274900 0.90200700  
H 4.34378700 1.29152600 -1.01909200  
C 5.43949500 0.56659500 2.11691700  
H 4.74138800 -1.10784100 3.29204600  
H 5.92697600 2.12440800 0.70469100  
C 4.65944700 -1.99902100 -1.93211000  
N 5.78787500 -2.31768300 -1.91226500  
H 6.13161200 0.91426700 2.87960600  
Cl 2.81458700 -2.44841500 1.73932600

Cl -6.45454700 -2.42435100 -0.94298600  
H 1.72365200 2.33272200 -0.11797400

In<sub>2</sub>r<sub>(1,3)</sub>

Charge= -1 multiplicity= 1

C -3.13897000 2.58201400 2.31381100  
C -2.82031300 2.71658800 -0.09166000  
O 0.09166500 2.56107300 -2.12596500  
C -0.60460300 2.40120300 -1.14178600  
O -0.43482700 2.09466700 2.51342700  
O -4.01495800 2.96827000 -0.17331000  
H -3.51578000 3.60508000 2.40056000  
N -2.24211900 2.46155100 1.16245400  
C -0.89068000 2.18107500 1.38075700  
N -1.97236300 2.71093900 -1.18785500  
H -2.56182600 2.31832900 3.19785800  
C -0.05840200 1.88842700 0.16300000  
C -2.53422300 2.98653200 -2.51207500  
H -3.59107000 3.21109600 -2.38772500  
H -2.39808100 2.10432200 -3.14151900  
H -2.00966400 3.83071600 -2.96525100  
H -3.99143900 1.91096600 2.18964200  
C -3.96472900 -2.14460400 -1.20969800  
H -3.96542400 -1.63264600 -2.16663500  
C -0.88727100 -0.60051000 0.38710900  
O -1.95112600 -0.18309300 -1.70673800  
C -0.99373200 -1.27943400 1.55438100  
C 0.31688500 0.30152300 0.17193500  
O -1.95861200 -2.18502800 1.86798400  
C -2.92112400 -2.46338200 0.93981500  
C -2.94370000 -1.81555800 -0.30182700  
C -1.91519100 -0.80342700 -0.64214300  
C -3.88436800 -3.41805400 1.28717500  
H -3.82790100 -3.89590400 2.26004300  
H 0.90862600 0.24561800 1.08933700

|    |             |             |             |
|----|-------------|-------------|-------------|
| C  | -4.88084100 | -3.72611200 | 0.37163300  |
| C  | -4.92401700 | -3.08990300 | -0.88133700 |
| H  | -5.63222400 | -4.46796900 | 0.62941800  |
| H  | -0.28990300 | -1.17937000 | 2.37190300  |
| C  | 2.69333800  | -1.27410300 | -3.22963400 |
| C  | 1.14504100  | -0.15945600 | -0.98248500 |
| N  | 2.17773200  | -1.62541500 | -4.22150300 |
| C  | 2.50088100  | -0.34048900 | -0.93621600 |
| C  | 3.29959400  | -0.85426000 | -2.02314100 |
| H  | 0.62330200  | -0.37878600 | -1.90749900 |
| C  | 3.27061300  | 0.07013800  | 0.28615900  |
| C  | 3.47408200  | -0.74718200 | 1.40632800  |
| C  | 3.84481400  | 1.35228500  | 0.32475500  |
| C  | 4.20395300  | -0.31781400 | 2.51636700  |
| C  | 4.57677800  | 1.79901800  | 1.42257000  |
| H  | 3.70921300  | 1.99164800  | -0.54271600 |
| C  | 4.75736200  | 0.96052300  | 2.52307500  |
| H  | 4.33503600  | -0.98674700 | 3.36072200  |
| H  | 5.00840000  | 2.79642600  | 1.41607100  |
| C  | 4.70342500  | -0.98238700 | -1.92831900 |
| N  | 5.86966500  | -1.08947300 | -1.86436400 |
| H  | 5.32765200  | 1.29488000  | 3.38600600  |
| H  | -5.70820000 | -3.34152700 | -1.58980000 |
| Cl | 2.78996600  | -2.37505300 | 1.46233900  |
| H  | 0.91472300  | 2.36353100  | 0.30423000  |

In<sub>2h</sub>(1,3)

Charge= -1 multiplicity= 1

|   |             |             |             |
|---|-------------|-------------|-------------|
| C | 1.99095000  | -3.77907400 | 1.90791800  |
| C | 2.28607300  | -3.23659700 | -0.44298100 |
| O | 0.01359400  | -2.12543400 | -2.94056000 |
| C | 0.44811000  | -2.32585500 | -1.82301300 |
| O | -0.61682100 | -2.93266700 | 1.64088900  |
| O | 3.43439200  | -3.64113900 | -0.32706000 |
| H | 2.24215700  | -4.83490000 | 1.77373900  |

N 1.43205800 -3.22462100 0.67261500  
C 0.10234600 -2.79879300 0.66045300  
N 1.74983900 -2.81914600 -1.65106900  
H 1.23247400 -3.66866500 2.68031500  
C -0.36702600 -2.08140900 -0.57894700  
C 2.60301900 -2.83729600 -2.84208900  
H 3.57422100 -3.23199000 -2.55283000  
H 2.69747400 -1.81749500 -3.22124500  
H 2.14572200 -3.46206700 -3.61271400  
H 2.90217600 -3.24019600 2.17561000  
C 4.05854800 1.58063500 0.08553300  
H 4.26340600 1.32771900 -0.94867200  
C 0.58813300 0.11216000 0.50348500  
O 2.10833800 0.08131800 -1.33734100  
C 0.45811800 0.45378800 1.80845700  
C -0.59788400 -0.52358600 -0.20855300  
O 1.37680000 1.12617000 2.55748100  
C 2.54861300 1.49827500 1.96979600  
C 2.82960900 1.17992000 0.63542000  
C 1.84854700 0.42363100 -0.18372400  
C 3.46463100 2.20503900 2.75873500  
H 3.21247500 2.43493200 3.78881300  
H -1.39330100 -0.59911200 0.53720000  
C 4.67341300 2.59737000 2.20516900  
C 4.96017300 2.27954200 0.86743300  
H 5.39707400 3.14763500 2.79693600  
H -0.42300400 0.23587200 2.40037300  
C -1.65882000 2.50820000 -3.22033200  
C -1.06572200 0.34576800 -1.33344600  
N -0.83751000 2.95253800 -3.92845400  
C -2.29444300 0.95584900 -1.38332800  
C -2.63721300 1.97668600 -2.34767200  
H -0.33357600 0.59196000 -2.09475800  
C -3.36307300 0.60029000 -0.39428000  
C -3.83156300 1.53570900 0.53485400

|    |             |             |             |
|----|-------------|-------------|-------------|
| C  | -3.93895400 | -0.68142800 | -0.37293100 |
| C  | -4.82001500 | 1.21362300  | 1.46845900  |
| H  | -3.41873500 | 2.54015500  | 0.52331600  |
| C  | -4.92670300 | -1.01919600 | 0.54601800  |
| H  | -3.61508000 | -1.41475400 | -1.10662600 |
| C  | -5.37215900 | -0.07118900 | 1.47449900  |
| H  | -5.15368200 | 1.97062600  | 2.16983500  |
| H  | -5.37363600 | -2.00892800 | 0.55636900  |
| C  | -6.86931100 | 0.44403700  | 3.26063800  |
| H  | -7.63933500 | -0.08194700 | 3.83062600  |
| H  | -6.09743900 | 0.80973400  | 3.95312600  |
| H  | -7.32245000 | 1.30550000  | 2.75054300  |
| O  | -6.35028700 | -0.49634700 | 2.34240500  |
| C  | -3.95211500 | 2.47596200  | -2.49020500 |
| N  | -5.03350400 | 2.91157200  | -2.61905700 |
| Cl | 6.50492100  | 2.78830400  | 0.18829200  |
| H  | -1.37659200 | -2.43523400 | -0.79787900 |

In<sub>2</sub>i<sub>(1,3)</sub>

Charge= -1 multiplicity= 1

|   |             |            |             |
|---|-------------|------------|-------------|
| C | -2.32422300 | 2.72023800 | 3.05814800  |
| C | -2.48383000 | 3.17736000 | 0.67527800  |
| O | -0.07197700 | 3.12665000 | -1.94839600 |
| C | -0.56944000 | 2.89552800 | -0.86367200 |
| O | 0.33163000  | 2.11824900 | 2.61812700  |
| O | -3.65207300 | 3.48549900 | 0.86453100  |
| H | -2.58571800 | 3.73906000 | 3.35871500  |
| N | -1.68965400 | 2.71985100 | 1.73879000  |
| C | -0.34432700 | 2.36322600 | 1.62863300  |
| N | -1.87783000 | 3.31286600 | -0.56163900 |
| H | -1.60760900 | 2.29616100 | 3.75886500  |
| C | 0.19484500  | 2.19410200 | 0.23189600  |
| C | -2.72681500 | 3.79509100 | -1.65269500 |
| H | -3.24258400 | 4.70643700 | -1.34523100 |
| H | -3.46369700 | 3.02955000 | -1.90942900 |

H -2.07577900 3.98289100 -2.50398900  
H -3.23945300 2.12567000 3.02623300  
C -4.19655000 -1.39100300 -0.58784600  
H -4.42444700 -0.69381400 -1.38626400  
C -0.69233600 -0.28844600 0.34308700  
O -2.22641300 0.53423600 -1.28811100  
C -0.51874600 -1.20689600 1.32508600  
C 0.47761000 0.61732700 -0.01304800  
O -1.42806300 -2.14585500 1.70701400  
C -2.62948000 -2.19201900 1.06719900  
C -2.94098100 -1.29833700 0.03548400  
C -1.96065600 -0.26805800 -0.39073100  
C -3.54157500 -3.16903300 1.48532800  
H -3.26456500 -3.84570000 2.28713600  
H 1.24075500 0.43191200 0.74475800  
C -4.77763800 -3.25171600 0.86331600  
C -5.09452700 -2.35700200 -0.17203000  
H -5.49925000 -4.00151800 1.16950500  
H 0.40055300 -1.31836500 1.88588000  
C 1.99775000 -0.63270500 -3.98348600  
C 1.03029100 0.26972500 -1.35761500  
N 1.27671800 -0.75123000 -4.89977500  
C 2.33760000 -0.06014700 -1.58469600  
C 2.85373600 -0.49818600 -2.86593400  
H 0.33176700 0.24225300 -2.18756100  
C 3.35954100 0.06674600 -0.48867500  
C 3.46305200 -0.87001100 0.54614400  
C 4.25144400 1.15389800 -0.50013200  
C 4.44424500 -0.73017200 1.55124500  
C 5.21070300 1.29750300 0.49379200  
H 4.18063800 1.87365200 -1.30946800  
C 5.31558800 0.35954900 1.52612700  
H 5.89310300 2.14339300 0.47257700  
C 4.20748300 -0.85640400 -3.05238100  
N 5.32639200 -1.16698500 -3.22189000

|    |             |             |             |
|----|-------------|-------------|-------------|
| Cl | -6.67381400 | -2.48202300 | -0.94584600 |
| H  | 6.07236700  | 0.48376300  | 2.29280800  |
| O  | 2.57307600  | -1.92037700 | 0.65045800  |
| O  | 4.45603700  | -1.71610500 | 2.50585400  |
| C  | 2.95185700  | -3.09029500 | -0.08189700 |
| H  | 3.07167400  | -2.86504900 | -1.14654600 |
| H  | 3.88423500  | -3.51181100 | 0.31520300  |
| H  | 2.14019000  | -3.81049400 | 0.05305700  |
| C  | 5.42466500  | -1.62333900 | 3.52976200  |
| H  | 5.30222400  | -0.70812600 | 4.12645300  |
| H  | 5.26806600  | -2.49307600 | 4.17258100  |
| H  | 6.44819500  | -1.65033700 | 3.12928100  |
| H  | 1.20133600  | 2.61892100  | 0.21647800  |

**Table 11:** Thermodynamic parameters for TS<sub>3</sub> at b3lyp/6-31g (d) level of theory in cycloaddition step

| TS               | G            | H            | S       | E            |
|------------------|--------------|--------------|---------|--------------|
| TS <sub>3a</sub> | -1635.121379 | -1635.026324 | 200.060 | -1635.467885 |
| TS <sub>3b</sub> | -1749.613782 | -1749.512587 | 212.982 | -1749.989503 |
| TS <sub>3c</sub> | -1864.094396 | -1863.986460 | 227.171 | -1864.498455 |
| TS <sub>3d</sub> | -2094.730007 | -2094.631462 | 207.406 | -2095.064553 |
| TS <sub>3e</sub> | -2554.334544 | -2554.232647 | 214.460 | -2554.657262 |

TS<sub>3a</sub>

Imaginary Freq = -147.35

Charge = -1 multiplicity= 1

C -0.30053100 3.16938200 2.96850500  
C 0.28736700 3.81162800 0.71777600  
O 0.95705900 1.87604500 -2.22427100  
C 0.54251100 2.11069800 -1.08289800  
O -0.29160700 0.56979600 2.10190800  
O 0.40284500 4.97605300 1.09658600  
H -1.06887600 3.94437500 3.03395000  
N -0.08790500 2.79528200 1.57483800  
C -0.13013200 1.41597500 1.21871300  
N 0.52743200 3.45574400 -0.60901300  
H 0.62137500 3.56183600 3.41051300  
C -0.01987800 1.13802300 -0.18870700  
C 1.05563000 4.50928300 -1.47250400  
H 0.38368200 5.37070300 -1.46404700  
H 1.14174100 4.08596000 -2.47189800  
H 2.03949800 4.84206000 -1.12394200  
H -0.61104500 2.26726700 3.49282400  
C 5.05510800 -0.83875400 0.71408400  
H 5.06293800 0.15081000 1.15990100  
C 1.45732600 -0.98410400 -0.49505300



O 2.71081700 0.73234600 0.63946300  
C 1.57310400 -2.22200400 -1.02816500  
C 0.08385800 -0.30322600 -0.63627700  
O 2.67904400 -3.01744900 -1.03537300  
C 3.81684600 -2.54116600 -0.45063500  
C 3.85143100 -1.26939200 0.13110700  
C 2.64896300 -0.38778600 0.13778300  
C 4.93938400 -3.37810600 -0.46233900  
H 4.86389400 -4.35647800 -0.92657700  
H -0.10363000 -0.25241700 -1.71874200  
C 6.11568500 -2.92802000 0.12093400  
C 6.17676400 -1.65442000 0.71210900  
H 6.99379300 -3.56885200 0.11795600  
H 0.75253000 -2.72640100 -1.52721700  
C -2.28006500 1.50501800 -0.87209900  
C -1.01357500 -1.16126900 -0.03324100  
N -2.53139100 2.71688600 -0.87017500  
C -2.31893500 -0.95544600 -0.29238900  
C -2.75247900 0.23344300 -1.07207900  
H -0.71844600 -1.93795300 0.66462300  
C -3.36587500 -1.85995000 0.25202600  
C -4.62422900 -1.36627300 0.63897500  
C -3.12907900 -3.23826000 0.40269100  
C -5.59369000 -2.21071800 1.17744600  
H -4.83152200 -0.30699600 0.52414100  
C -4.09507700 -4.08253500 0.94640900  
C -5.33508000 -3.57333100 1.33843500  
H -6.55619200 -1.80007700 1.47412000  
H -3.88404000 -5.14485400 1.04994600  
C -3.72714100 0.09019200 -2.10056400  
N -4.52485500 -0.04789700 -2.94406100  
H -6.09390400 -4.23246400 1.75387200  
H -1.77277100 3.35556900 -1.11409100  
H -2.17922400 -3.64810600 0.07076500  
H 7.10269200 -1.31172300 1.16602100

TS<sub>3b</sub>

Imaginary Freq = -147.90

Charge = -1 multiplicity= 1

|   |             |             |             |
|---|-------------|-------------|-------------|
| C | -1.10377800 | -3.04971200 | 3.12589300  |
| C | -2.04899900 | -3.56502600 | 0.96623300  |
| O | -2.20325600 | -1.69156300 | -2.08599100 |
| C | -1.81482900 | -1.99364800 | -0.95130500 |
| O | -0.25189100 | -0.67619700 | 2.05423700  |
| O | -2.54370000 | -4.58515600 | 1.44317100  |
| H | -0.65880000 | -4.04426400 | 3.21613900  |
| N | -1.27258800 | -2.70532000 | 1.71869400  |
| C | -0.76839600 | -1.45689900 | 1.25068300  |
| N | -2.24530600 | -3.22352500 | -0.37143700 |
| H | -2.06930400 | -3.05755800 | 3.64264200  |
| C | -0.87638400 | -1.24002900 | -0.16778800 |
| C | -3.17787400 | -4.06298400 | -1.11982200 |
| H | -2.85841000 | -5.10686200 | -1.07584900 |
| H | -3.18272900 | -3.69481100 | -2.14443400 |
| H | -4.18638800 | -3.99798400 | -0.69682800 |
| H | -0.45451200 | -2.29126400 | 3.55989600  |
| C | -4.82616000 | 2.48463200  | 0.83122500  |
| H | -5.15577900 | 1.58923600  | 1.34860300  |
| C | -1.51583900 | 1.25207100  | -0.56560100 |
| O | -3.21621600 | 0.16756000  | 0.75284300  |
| C | -1.21849900 | 2.41909700  | -1.18174600 |
| C | -0.49228700 | 0.11299800  | -0.72506300 |
| O | -1.96271700 | 3.56046800  | -1.19239000 |
| C | -3.14901700 | 3.56003800  | -0.51731500 |
| C | -3.59486600 | 2.41871500  | 0.15764100  |
| C | -2.79249900 | 1.16187800  | 0.16803000  |
| C | -3.89376000 | 4.74574100  | -0.53371500 |
| H | -3.50660100 | 5.60516400  | -1.07219400 |
| H | -0.42331300 | -0.06343300 | -1.80832900 |
| C | -5.10654900 | 4.78364600  | 0.14021400  |
| C | -5.57692100 | 3.65073500  | 0.82616700  |

|   |             |             |             |
|---|-------------|-------------|-------------|
| H | -5.69357800 | 5.69859900  | 0.13454000  |
| H | -0.31019900 | 2.56542300  | -1.75644400 |
| C | 1.04293100  | -2.44016500 | -0.92969200 |
| C | 0.88366500  | 0.54861200  | -0.25321000 |
| N | 0.84441600  | -3.65863000 | -0.83969600 |
| C | 2.00454600  | -0.13089800 | -0.56154200 |
| C | 1.92320800  | -1.44122700 | -1.25806900 |
| H | 0.94193900  | 1.41839700  | 0.39304000  |
| C | 3.34598600  | 0.36641200  | -0.15910500 |
| C | 4.37395400  | -0.51790700 | 0.22219900  |
| C | 3.63967500  | 1.73661300  | -0.13465400 |
| C | 5.61617400  | -0.05312200 | 0.63208700  |
| H | 4.18292500  | -1.58628600 | 0.20552900  |
| C | 4.88202800  | 2.22190600  | 0.28040900  |
| C | 5.87901400  | 1.32215000  | 0.66844000  |
| H | 6.40159200  | -0.74082200 | 0.93177000  |
| H | 5.06104200  | 3.29182200  | 0.27845500  |
| C | 2.80528400  | -1.72457900 | -2.33972100 |
| N | 3.53449500  | -1.93651700 | -3.22872200 |
| H | -0.10846200 | -3.99287900 | -0.99190900 |
| H | 2.88250600  | 2.44330400  | -0.46265000 |
| O | 7.13887800  | 1.68261500  | 1.08639600  |
| C | 7.44543300  | 3.06038800  | 1.13802100  |
| H | 6.78519700  | 3.60098900  | 1.83134800  |
| H | 8.47528500  | 3.12936600  | 1.49734400  |
| H | 7.37801400  | 3.53236400  | 0.14729800  |
| H | -6.52777200 | 3.69101000  | 1.35066000  |

TS<sub>3c</sub>

Imaginary Freq = -182.42

Charge = -1 multiplicity= 1

|   |            |            |             |
|---|------------|------------|-------------|
| C | 0.50289000 | 2.86813300 | 3.10391700  |
| C | 1.74198200 | 3.64523200 | 1.18864500  |
| O | 2.52370200 | 2.11978000 | -1.94239300 |
| C | 1.94807400 | 2.24163300 | -0.85274100 |

O 0.05753200 0.54756100 1.75374700  
O 2.03726000 4.66167300 1.81541200  
H -0.05412800 3.80609500 3.17694400  
N 0.94865700 2.65746700 1.72933200  
C 0.62793000 1.40494100 1.09297200  
N 2.19057800 3.42346200 -0.11652100  
H 1.35822300 2.92492700 3.78537200  
C 0.97630000 1.31799500 -0.31303200  
C 3.11370800 4.39532800 -0.69958300  
H 3.05637000 5.30593600 -0.10639900  
H 2.83031900 4.57879200 -1.73719100  
H 4.14016800 4.01158400 -0.69091000  
H -0.12705400 2.01933300 3.36364200  
C 3.67143400 -3.60784700 1.40824000  
H 2.84366200 -3.80874700 2.08124700  
C 2.09983000 -0.93108600 -0.78248100  
O 1.21612400 -2.25226600 1.02282400  
C 3.18560500 -0.78159600 -1.58031100  
C 0.89445500 -0.01955900 -1.05508300  
O 4.36809700 -1.45355900 -1.47666600  
C 4.51146800 -2.37060100 -0.47760300  
C 3.46238100 -2.64621900 0.40577300  
C 2.14933600 -1.94853500 0.28458400  
C 5.74626200 -3.02466600 -0.38064300  
H 6.53123300 -2.77767500 -1.08872400  
H 0.99833500 0.27371800 -2.10918300  
C 5.92790800 -3.96830900 0.62109900  
C 4.88893900 -4.26302900 1.52062300  
H 6.88310100 -4.48037600 0.70709300  
H 3.23039300 -0.05186800 -2.37818700  
C -0.84263600 2.30102400 -1.25377200  
C -0.43757900 -0.71865500 -0.92743200  
N -0.59179300 3.42779400 -1.72545900  
C -1.63679900 -0.10852700 -1.00463000  
C -1.82330200 1.33656000 -1.20118300

H -0.42162200 -1.78013600 -0.71649600  
C -2.86051100 -0.97019400 -0.92720000  
C -3.76008200 -0.88738600 0.15075700  
C -3.09773800 -1.91344800 -1.94029600  
C -4.87026000 -1.76190500 0.20297600  
C -4.20601200 -2.75057200 -1.89880900  
C -5.09905900 -2.67620600 -0.82765000  
H -4.38436800 -3.46628500 -2.69754500  
C -3.13644900 1.86326600 -1.36672800  
N -4.21254300 2.29817200 -1.51043200  
H -0.00492000 4.04423500 -1.16143600  
H -2.40024700 -1.96156700 -2.77085000  
H -5.95564600 -3.34048500 -0.79337200  
O -3.46118200 -0.02975400 1.17016700  
O -5.66008000 -1.66708300 1.32640700  
C -4.45125400 0.90079000 1.61776900  
H -4.97160900 1.35680100 0.77011300  
H -5.16907600 0.42805500 2.29458700  
H -3.89444000 1.67578500 2.15099900  
C -6.77616100 -2.52414400 1.42626100  
H -6.48008300 -3.58312600 1.42569900  
H -7.25415000 -2.28720400 2.38007800  
H -7.49627800 -2.35818700 0.61194100  
H 5.04193300 -5.00318900 2.30153100

TS<sub>3d</sub>

Imaginary Freq = -151.32

Charge = -1 multiplicity= 1

C -0.84409600 3.14907000 2.95995300  
C -0.42291000 3.85039300 0.68911800  
O 0.24128900 1.99027100 -2.30260700  
C -0.13494800 2.18778800 -1.14106200  
O -0.68751200 0.56328300 2.06230300  
O -0.37573700 5.01700800 1.07445700  
H -1.66375100 3.86352200 3.07323800

N -0.67703800 2.80219800 1.55279400  
C -0.63763400 1.42713200 1.18315800  
N -0.22219400 3.52339600 -0.65204800  
H 0.06775100 3.60644500 3.35798600  
C -0.58471900 1.17016800 -0.23232600  
C 0.18449100 4.61982300 -1.52824100  
H -0.54692000 5.42963200 -1.47617800  
H 0.25080900 4.21244100 -2.53571400  
H 1.15784300 5.02047100 -1.22469600  
H -1.05866500 2.22253000 3.48962700  
C 4.65269700 -0.44620900 0.36953800  
H 4.62084600 0.53117200 0.83796700  
C 1.02054000 -0.83645600 -0.65125400  
O 2.21059200 0.94226400 0.45799900  
C 1.19455700 -2.05242000 -1.21815100  
C -0.40386800 -0.25545900 -0.70372000  
O 2.35322200 -2.76607600 -1.30214800  
C 3.48190500 -2.21991900 -0.76925200  
C 3.45869600 -0.96109600 -0.16101400  
C 2.19734700 -0.16708900 -0.06777000  
C 4.66129500 -2.96952200 -0.85834100  
H 4.63774700 -3.94227700 -1.33892300  
H -0.65546100 -0.20854400 -1.77331900  
C 5.83419000 -2.45130400 -0.33071000  
C 5.81685000 -1.18810100 0.28103600  
H 6.76025100 -3.01335700 -0.38767200  
H 0.38631800 -2.60540300 -1.68420000  
C -2.89015800 1.38034400 -0.78736200  
C -1.39944100 -1.19760500 -0.05178200  
N -3.22840900 2.57077700 -0.76172900  
C -2.72848700 -1.08215100 -0.23563100  
C -3.28697500 0.08033400 -0.97330100  
H -1.01089000 -1.95718100 0.61855500  
C -3.67658300 -2.06513800 0.35229000  
C -4.94015000 -1.66554900 0.82172700

|    |             |             |             |
|----|-------------|-------------|-------------|
| C  | -3.33671900 | -3.42538400 | 0.46330000  |
| C  | -5.81504200 | -2.58308800 | 1.40097100  |
| H  | -5.22617700 | -0.62174600 | 0.73879500  |
| C  | -4.20800400 | -4.34268200 | 1.04733700  |
| C  | -5.45408700 | -3.92652300 | 1.52117400  |
| H  | -6.78383200 | -2.24489800 | 1.76156400  |
| H  | -3.91880700 | -5.38909300 | 1.11868400  |
| C  | -4.31096000 | -0.12100500 | -1.94247200 |
| N  | -5.14700300 | -0.30676900 | -2.73827300 |
| H  | -6.13945100 | -4.64272100 | 1.96852500  |
| H  | -2.53425800 | 3.26541600  | -1.04135200 |
| Cl | 7.32118300  | -0.54792600 | 0.94589300  |
| H  | -2.38251200 | -3.76300900 | 0.06842100  |

TS<sub>3e</sub>

Imaginary Freq = -135.94

Charge = -1 multiplicity= 1

|   |             |             |             |
|---|-------------|-------------|-------------|
| C | -0.34805700 | 3.49113000  | 2.88690800  |
| C | 0.10902800  | 4.08762200  | 0.59275600  |
| O | 0.54439600  | 2.09729700  | -2.35752000 |
| C | 0.21479300  | 2.35661100  | -1.19421000 |
| O | -0.45297100 | 0.87719300  | 2.05962900  |
| O | 0.26922900  | 5.25456200  | 0.94549200  |
| H | -1.10314300 | 4.27521300  | 2.98948800  |
| N | -0.23039900 | 3.09152500  | 1.48895300  |
| C | -0.32474500 | 1.71031300  | 1.15676700  |
| N | 0.25799800  | 3.70770600  | -0.74066000 |
| H | 0.60440000  | 3.88144100  | 3.26026600  |
| C | -0.30232200 | 1.40905400  | -0.24796300 |
| C | 0.75243600  | 4.73779700  | -1.65168900 |
| H | 0.09928900  | 5.61287700  | -1.61577400 |
| H | 0.76854800  | 4.29831600  | -2.64765800 |
| H | 1.76207000  | 5.05500500  | -1.36894600 |
| H | -0.63229500 | 2.60125200  | 3.44594900  |
| C | 4.79167300  | -0.59612000 | 0.32976400  |

H 4.86524500 0.42869300 0.67619300  
C 1.10863700 -0.75633600 -0.56259500  
O 2.49173200 1.01631300 0.30944800  
C 1.14899200 -2.04500800 -0.97482000  
C -0.25161300 -0.04159600 -0.67025200  
O 2.23433500 -2.86959300 -0.99324400  
C 3.42549500 -2.37373500 -0.55763500  
C 3.53838500 -1.05495400 -0.10736900  
C 2.35926100 -0.13919300 -0.08485000  
C 4.52757000 -3.23748400 -0.58064000  
H 4.39832000 -4.25421700 -0.93740200  
H -0.47759200 -0.00879400 -1.74606800  
C 5.76007900 -2.77376200 -0.14667600  
C 5.87918500 -1.45052900 0.30636700  
H 6.62827900 -3.42408300 -0.15503900  
H 0.27782100 -2.57431000 -1.34490400  
C -2.60723400 1.83139800 -0.80871300  
C -1.34429600 -0.86164300 -0.00883300  
N -2.82049100 3.04940000 -0.80150100  
C -2.65137700 -0.62379500 -0.20516600  
C -3.11465600 0.56885200 -0.96164000  
H -1.04006900 -1.65650300 0.66287900  
C -3.70350300 -1.46263300 0.43583000  
C -4.73889500 -0.82154000 1.14515300  
C -3.76342100 -2.86759800 0.39130200  
C -5.74796300 -1.52542300 1.79229800  
H -4.72403500 0.26330100 1.18090300  
C -4.77072000 -3.59058800 1.03354300  
C -5.76479000 -2.92016700 1.74109400  
H -6.51940500 -0.98558900 2.33506600  
H -4.77288500 -4.67338600 0.96277400  
C -4.18185300 0.43738500 -1.89621700  
N -5.05874100 0.30862500 -2.65813300  
H -6.54872900 -3.48617300 2.23764400  
Cl -2.58994900 -3.82773200 -0.52836700



|    |             |             |             |
|----|-------------|-------------|-------------|
| H  | -2.07020900 | 3.66455000  | -1.12008500 |
| Cl | 7.45768500  | -0.88126200 | 0.85416600  |

**Table 12:** Thermodynamic parameters for intermediates **3a-3e** at b3lyp/6-31g (d) level of theory

| Intermediate <b>3</b> | G            | H            | S       | E            |
|-----------------------|--------------|--------------|---------|--------------|
| In <sub>3a</sub>      | -1635.687039 | -1635.593535 | 196.795 | -1636.052440 |
| In <sub>3b</sub>      | -1750.180599 | -1750.081044 | 209.530 | -1750.575299 |
| In <sub>3c</sub>      | -1864.663769 | -1864.557955 | 222.704 | -1865.087490 |
| In <sub>3d</sub>      | -2095.292299 | -2095.195305 | 204.141 | -2095.645659 |
| In <sub>3e</sub>      | -2554.896952 | -2554.796012 | 212.446 | -2555.237872 |

In<sub>3a</sub>

Charge= 0 multiplicity= 1

C 1.13734800 1.12301900 3.30629200  
C 2.02818900 2.16750000 1.26914600  
O 0.50267200 2.87892800 -1.89949800  
C 0.65441900 2.40117400 -0.77947700  
O -1.22004100 0.96348300 2.02515300  
O 3.10287400 2.36978400 1.80420000  
H 2.17023700 1.31245100 3.58803500  
N 0.97150800 1.52895700 1.90249800  
C -0.28287900 1.30121900 1.33524900  
N 1.80020700 2.62669600 -0.04389600  
H 0.89993000 0.06120000 3.38679700  
C -0.38779200 1.45779400 -0.19159600  
C 2.89559500 3.40606600 -0.64046300  
H 3.10363100 4.28306500 -0.02442400  
H 2.57849900 3.70584400 -1.63646500  
H 3.79829600 2.79401500 -0.68972700  
H 0.45653700 1.69625700 3.93944200  
C 3.62257200 -2.63481200 1.07209700  
H 3.05574800 -2.78701800 1.98477000  
C 1.18483700 -0.53413100 -0.94068100  
O 1.01896400 -1.44289100 1.25280300

C 1.97815200 -0.41853000 -2.03376300  
C -0.20291200 0.07054900 -0.97545000  
O 3.21554900 -0.93641400 -2.16830500  
C 3.74427500 -1.66775600 -1.13255500  
C 3.02549200 -1.87315300 0.05220100  
C 1.67509000 -1.29476800 0.22038900  
C 5.02510400 -2.19405000 -1.32024600  
H 5.54482200 -2.00934300 -2.25456600  
H -0.38279700 0.39677500 -2.01214600  
C 5.59165400 -2.94215300 -0.29694400  
C 4.89166500 -3.16511300 0.90153900  
H 6.58652300 -3.35783400 -0.42822200  
H 1.68846500 0.11854900 -2.93115600  
C -1.80880100 1.92479600 -0.52704100  
C -1.30021300 -0.88886600 -0.59338100  
N -2.01104300 3.27906800 -0.56121900  
C -2.56709100 -0.44742600 -0.46692000  
C -2.81629000 0.99752300 -0.63694500  
H -1.04510600 -1.92051400 -0.38668900  
C -3.68527100 -1.36674500 -0.13939200  
C -4.64024300 -1.02524600 0.83227600  
C -3.79087500 -2.61370800 -0.77623200  
C -5.66469000 -1.91094200 1.16166600  
H -4.56321000 -0.07252700 1.34706200  
C -4.81575200 -3.49885000 -0.44560600  
C -5.75694900 -3.14995900 0.52458300  
H -6.39065500 -1.63281800 1.92090800  
H -4.88518100 -4.45702500 -0.95402700  
C -4.12176900 1.49576900 -0.92667700  
N -5.14796700 1.98988000 -1.17801400  
H -6.55982800 -3.83677500 0.77898400  
H -1.30023100 3.81388500 -1.04808200  
H -2.95709700 3.57025100 -0.78754200  
H -3.07299000 -2.87653900 -1.54833400  
H 5.34812400 -3.75242800 1.69254700

In<sub>3b</sub>

Charge= 0 multiplicity= 1

|   |             |             |             |
|---|-------------|-------------|-------------|
| C | -1.78186500 | -0.92088300 | 3.33568900  |
| C | -2.93902500 | -1.76125700 | 1.33848600  |
| O | -1.69317100 | -2.88936100 | -1.83147300 |
| C | -1.70263100 | -2.36429400 | -0.72233000 |
| O | 0.51807500  | -1.36336200 | 2.01780000  |
| O | -4.02014600 | -1.68606300 | 1.89346200  |
| H | -2.82387500 | -0.85463700 | 3.63893000  |
| N | -1.74716200 | -1.38417900 | 1.94041200  |
| C | -0.48616200 | -1.47908300 | 1.34971800  |
| N | -2.85460200 | -2.28944800 | 0.03443900  |
| H | -1.29876100 | 0.05613800  | 3.38531700  |
| C | -0.45255400 | -1.68848900 | -0.17357700 |
| C | -4.11710000 | -2.79369200 | -0.52656600 |
| H | -4.51620700 | -3.58426800 | 0.11198800  |
| H | -3.90213400 | -3.17851100 | -1.52062500 |
| H | -4.84779600 | -1.98398000 | -0.57453500 |
| H | -1.24173600 | -1.62535400 | 3.97200400  |
| C | -3.33816100 | 3.27916500  | 1.03348900  |
| H | -2.73450700 | 3.31108500  | 1.93461900  |
| C | -1.51393000 | 0.60764400  | -0.95218500 |
| O | -1.09522200 | 1.50096900  | 1.21450400  |
| C | -2.33257000 | 0.66105200  | -2.03130600 |
| C | -0.31282100 | -0.31383000 | -0.98998800 |
| O | -3.41194900 | 1.45820100  | -2.16448800 |
| C | -3.72985800 | 2.31922000  | -1.14255100 |
| C | -2.96091700 | 2.37268600  | 0.02713400  |
| C | -1.78586200 | 1.49039100  | 0.19421500  |
| C | -4.84963500 | 3.13436800  | -1.32835800 |
| H | -5.41583900 | 3.05875000  | -2.25079200 |
| H | -0.23792100 | -0.69702400 | -2.02007400 |
| C | -5.20038900 | 4.02052100  | -0.31866200 |
| C | -4.44520600 | 4.09576000  | 0.86458300  |
| H | -6.06825800 | 4.66060400  | -0.44872200 |

|   |             |             |             |
|---|-------------|-------------|-------------|
| H | -2.19732000 | 0.04931900  | -2.91738500 |
| C | 0.80731800  | -2.49062200 | -0.51847500 |
| C | 0.98966400  | 0.36045100  | -0.64555400 |
| N | 0.67691300  | -3.85449100 | -0.52119700 |
| C | 2.11693200  | -0.36991200 | -0.52928600 |
| C | 2.00530200  | -1.83578500 | -0.66872400 |
| H | 0.99279800  | 1.42596800  | -0.45421300 |
| C | 3.43146800  | 0.25473600  | -0.25025000 |
| C | 4.31177600  | -0.28744900 | 0.70580800  |
| C | 3.82241100  | 1.42711300  | -0.90841700 |
| C | 5.52199800  | 0.32483200  | 0.99387500  |
| H | 4.02993700  | -1.18611100 | 1.24562300  |
| C | 5.03794900  | 2.05435700  | -0.62980000 |
| C | 5.89607500  | 1.50161500  | 0.32768500  |
| H | 6.19721600  | -0.08770700 | 1.73683800  |
| H | 5.30666900  | 2.95549200  | -1.16918300 |
| C | 3.14502800  | -2.64002500 | -0.97022000 |
| N | 4.01555400  | -3.37191400 | -1.22910200 |
| H | -0.15082500 | -4.21172500 | -0.98555800 |
| H | 1.52053700  | -4.36920700 | -0.75447900 |
| H | 3.17199700  | 1.84997800  | -1.66914200 |
| O | 7.10768900  | 2.02252800  | 0.67921800  |
| C | 7.53940500  | 3.21058000  | 0.03673800  |
| H | 6.85101000  | 4.04534600  | 0.22502000  |
| H | 8.51559400  | 3.44516400  | 0.46529100  |
| H | 7.64460800  | 3.06880600  | -1.04718000 |
| H | -4.73216000 | 4.79381400  | 1.64517500  |

In<sub>3c</sub>

Charge= 0 multiplicity= 1

|   |             |             |             |
|---|-------------|-------------|-------------|
| C | -2.48776000 | -1.09749200 | 3.22804900  |
| C | -3.27522500 | -1.94085100 | 1.05960100  |
| O | -1.50196500 | -2.84813600 | -1.92328000 |
| C | -1.71214700 | -2.36767000 | -0.81441200 |
| O | 0.00470000  | -1.30314200 | 2.25059100  |

O -4.42685800 -1.96871600 1.45411600  
H -3.56461700 -1.12024900 3.37628900  
N -2.21518300 -1.50071100 1.84039400  
C -0.87879500 -1.47667600 1.43908700  
N -2.96425100 -2.40588200 -0.23319700  
H -2.09501300 -0.09043300 3.37646900  
C -0.60798600 -1.62918300 -0.06801900  
C -4.08957200 -2.97753400 -0.98785900  
H -4.51262100 -3.82158200 -0.43945900  
H -3.70452200 -3.30330900 -1.95124100  
H -4.86733800 -2.22241300 -1.11717700  
H -1.99172000 -1.78528400 3.91645200  
C -3.93906100 3.10322600 0.91447400  
H -3.46176000 3.13251800 1.88852200  
C -1.70612700 0.62738900 -0.89955300  
O -1.63111800 1.45173500 1.33244400  
C -2.37632500 0.68048400 -2.07654900  
C -0.45288700 -0.21765800 -0.80771400  
O -3.47737600 1.41822000 -2.32512600  
C -3.98043400 2.21475300 -1.32581400  
C -3.37649900 2.26337600 -0.06273900  
C -2.18042600 1.44422600 0.22932100  
C -5.11564200 2.97039900 -1.63131500  
H -5.54982000 2.90112900 -2.62322000  
H -0.21276800 -0.54479000 -1.83163900  
C -5.65120800 3.79114300 -0.64787500  
C -5.06388600 3.86032400 0.62740800  
H -6.53323900 4.38460100 -0.87072600  
H -2.08545500 0.11836700 -2.95805100  
C 0.73823700 -2.34091400 -0.23949100  
C 0.74756600 0.51981200 -0.27081300  
N 0.69462500 -3.71377700 -0.24433400  
C 1.88939500 -0.14525700 -0.03231200  
C 1.89867400 -1.60976700 -0.21130400  
H 0.67686500 1.58691100 -0.10078400

C 3.09725800 0.55483500 0.49402300  
C 3.09530300 1.02410200 1.81612400  
C 4.21430600 0.76731900 -0.32788000  
C 4.20481200 1.69160100 2.32033900  
H 2.22409500 0.83393300 2.43467700  
C 5.32490700 1.48007800 0.18083900  
C 5.31751700 1.92006900 1.50715300  
H 4.21206900 2.04349000 3.34797900  
C 3.12440700 -2.33531600 -0.27542000  
N 4.08074400 -2.99975200 -0.34243900  
H 6.16994000 2.45758300 1.90659200  
O 4.11815200 0.34398300 -1.62688100  
O 6.34707900 1.71929600 -0.69955400  
C 5.21494300 -0.36460200 -2.22078800  
H 5.98926700 0.32211000 -2.56863300  
H 5.64121500 -1.08776700 -1.51912600  
H 4.78460500 -0.90410800 -3.06805100  
C 7.48936400 2.41310300 -0.22804200  
H 8.16908900 2.48213700 -1.07959400  
H 7.23463400 3.42497700 0.11438200  
H 7.98485100 1.87101600 0.58837500  
H -5.49415000 4.50716200 1.38599300  
H -0.01815500 -4.11919500 -0.84129000  
H 1.59584400 -4.17177700 -0.33929500

In<sub>3d</sub>

Charge= 0 multiplicity= 1

C -0.75532400 -1.13251000 3.28104800  
C -1.25957000 -2.56689500 1.35125600  
O 0.61594700 -3.30577400 -1.61740300  
C 0.28709800 -2.74579000 -0.57630800  
O 1.61503200 -0.63642200 2.11392100  
O -2.31133600 -2.92292000 1.84999900  
H -1.75211100 -1.49045100 3.52681100  
N -0.40477600 -1.65224100 1.95028800

C 0.82035800 -1.23874400 1.42563400  
N -0.84231100 -3.11953600 0.12322200  
H -0.73141200 -0.04253500 3.24170300  
C 1.07253200 -1.54590300 -0.06084200  
C -1.70844800 -4.17640800 -0.42133200  
H -1.78665300 -4.99574800 0.29582500  
H -1.25832500 -4.52228600 -1.34879500  
H -2.70825400 -3.77681700 -0.60222400  
H -0.03003200 -1.48444400 4.01802700  
C -3.74518100 1.75711100 0.44731300  
H -3.29862600 2.13324300 1.36073000  
C -0.79984600 -0.02187000 -1.14251500  
O -0.99307000 1.15669900 0.91828200  
C -1.46729200 -0.42878600 -2.25022500  
C 0.67904000 -0.32703800 -1.02569900  
O -2.76944000 -0.19731100 -2.51649800  
C -3.50912900 0.52733000 -1.61743300  
C -2.94138000 1.01689600 -0.43536900  
C -1.51874600 0.75346400 -0.11919000  
C -4.85098300 0.75574500 -1.93572000  
H -5.25646000 0.36052900 -2.86102900  
H 0.99918800 -0.72721000 -2.00080000  
C -5.63450300 1.48772700 -1.05638300  
C -5.07348900 1.98532200 0.13217200  
H -6.67818000 1.67889900 -1.28078200  
H -1.00877800 -0.99814900 -3.05199600  
C 2.57964900 -1.74560100 -0.25780400  
C 1.53095400 0.87614800 -0.71406300  
N 3.04795700 -3.02339500 -0.10478500  
C 2.84633600 0.72260900 -0.46475300  
C 3.38897500 -0.64964200 -0.43337200  
H 1.06181800 1.85016800 -0.65642800  
C 3.73155300 1.88409100 -0.20003000  
C 4.65470700 1.86163800 0.85825600  
C 3.63895100 3.04317400 -0.98704500



|    |             |             |             |
|----|-------------|-------------|-------------|
| C  | 5.45450700  | 2.97142900  | 1.12482000  |
| H  | 4.72648600  | 0.98004600  | 1.48773000  |
| C  | 4.43940100  | 4.15255400  | -0.71925400 |
| H  | 2.94707500  | 3.06105300  | -1.82460500 |
| C  | 5.35062200  | 4.12009000  | 0.33783200  |
| H  | 6.15825200  | 2.93911600  | 1.95214300  |
| H  | 4.35854000  | 5.03872200  | -1.34335400 |
| C  | 4.78591600  | -0.89831100 | -0.58615400 |
| N  | 5.90584300  | -1.19666000 | -0.71664900 |
| H  | 5.97914700  | 4.98230800  | 0.54405100  |
| Cl | -6.08540100 | 2.90944500  | 1.22680000  |
| H  | 2.49792200  | -3.74744000 | -0.55356900 |
| H  | 4.04791000  | -3.13790000 | -0.23901500 |

In<sub>3e</sub>

Charge= 0 multiplicity= 1

|   |             |             |             |
|---|-------------|-------------|-------------|
| C | 1.21302800  | 1.57893200  | 3.19706400  |
| C | 1.73442500  | 2.74557800  | 1.09826400  |
| O | -0.21560700 | 3.30134800  | -1.86124500 |
| C | 0.11931200  | 2.83355400  | -0.77795200 |
| O | -1.23667300 | 1.14178400  | 2.18354700  |
| O | 2.83102700  | 3.06926100  | 1.51531100  |
| H | 2.24209800  | 1.88714700  | 3.36454700  |
| N | 0.84061300  | 1.97440200  | 1.82985900  |
| C | -0.43286900 | 1.60234300  | 1.40125800  |
| N | 1.30542500  | 3.18940300  | -0.16852000 |
| H | 1.11220700  | 0.49587000  | 3.28108700  |
| C | -0.73083800 | 1.76521300  | -0.10052300 |
| C | 2.22298200  | 4.10681500  | -0.86178000 |
| H | 2.39147000  | 4.99419200  | -0.24860000 |
| H | 1.76040400  | 4.37867700  | -1.80758500 |
| H | 3.18197900  | 3.61234000  | -1.02816300 |
| H | 0.54721700  | 2.06213400  | 3.91551000  |
| C | 3.82036800  | -1.85441300 | 0.62043500  |
| H | 3.38439000  | -2.08592900 | 1.58557300  |

C 0.96535900 -0.01930700 -1.06630900  
O 1.14678400 -0.97146000 1.10821500  
C 1.61423000 0.20015200 -2.23628700  
C -0.47760200 0.41985800 -0.93349100  
O 2.88036300 -0.17072500 -2.51634700  
C 3.59654800 -0.84981000 -1.56419900  
C 3.04228400 -1.15230000 -0.31486800  
C 1.66095900 -0.73394200 0.01491100  
C 4.90037500 -1.22702600 -1.89847500  
H 5.29626100 -0.97557100 -2.87664400  
H -0.81188700 0.72942700 -1.93631500  
C 5.65884800 -1.91939000 -0.96669200  
C 5.11095900 -2.22957700 0.28976400  
H 6.67279000 -2.22370200 -1.20220000  
H 1.16860800 0.71027600 -3.08386900  
C -2.22480100 2.07023700 -0.25590900  
C -1.40619200 -0.66819400 -0.45793200  
N -2.58296300 3.39216400 -0.21452400  
C -2.68667300 -0.37305800 -0.17991700  
C -3.12307600 1.03251300 -0.27056500  
H -1.02383000 -1.67464200 -0.34603800  
C -3.65640400 -1.39754000 0.29712100  
C -4.18242900 -1.26911000 1.59456200  
C -4.07811800 -2.49768300 -0.46556200  
C -5.07893500 -2.19888300 2.11240800  
H -3.85336900 -0.42794200 2.19769200  
C -4.97920900 -3.43544700 0.04075100  
C -5.47838500 -3.28533200 1.33269100  
H -5.46277700 -2.07606100 3.12090100  
H -5.28660400 -4.26905100 -0.58149400  
C -4.50845000 1.36499100 -0.34885500  
N -5.61654200 1.72011000 -0.42470400  
H -6.18060000 -4.01624500 1.72367900  
Cl -3.50948600 -2.73174600 -2.11990500  
Cl 6.09059400 -3.10715200 1.45000700

H -2.00704600 4.01689500 -0.76812600

H -3.57719500 3.57420400 -0.31178200

**Table 13:** Thermodynamic parameters for TS<sub>3</sub> at b3lyp/6-31g (d) level of theory in the liberalization step of 1,3-dimethyl barbituric acid.

| TS <sub>3</sub>  | G            | H            | S       | E            |
|------------------|--------------|--------------|---------|--------------|
| TS <sub>3f</sub> | -2094.757380 | -2094.655921 | 213.538 | -2095.089546 |
| TS <sub>3g</sub> | -2094.758942 | -2094.656978 | 214.601 | -2095.090609 |
| TS <sub>3h</sub> | -2209.251357 | -2209.143587 | 226.821 | -2209.612659 |
| TS <sub>3i</sub> | -2323.736054 | -2323.622916 | 238.120 | -2324.127100 |

TS<sub>3f</sub>

Imaginary Freq = -277.96

Charge = -1 multiplicity= 1

C 3.51899400 2.23321900 -1.83809000  
C 2.47883900 2.69333800 0.30304300  
O -0.92500300 2.61277200 1.36308700  
C 0.04549100 2.41499800 0.63555600  
O 1.01927200 1.55162400 -2.77820300  
O 3.58721300 3.02553300 0.71115000  
H 3.93076500 3.24294400 -1.92667200  
N 2.31537800 2.24113700 -1.00985800  
C 1.08270300 1.86130500 -1.58549100  
N 1.33458700 2.76165200 1.08489600  
H 3.22712000 1.85636700 -2.81678200  
C -0.03615700 1.76597300 -0.66430300  
C 1.46009700 3.18625300 2.47829000  
H 2.49969000 3.45494000 2.65268500  
H 1.16289200 2.36296300 3.13294000  
H 0.80270800 4.03856200 2.66607600  
H 4.28190200 1.59322300 -1.38693700  
C 4.23701400 -1.67387800 1.41328200  
H 4.02976600 -1.22669900 2.38016400  
C 1.02382700 -0.83426300 -0.42593600  
O 1.77275800 -0.29060500 1.77993300  
C 1.40219800 -1.39408900 -1.60291100

C -0.32693000 -0.21695800 -0.33957600  
O 2.57999800 -2.02241200 -1.84710200  
C 3.49644500 -2.11390700 -0.83705500  
C 3.24886500 -1.55246500 0.42149700  
C 1.97713800 -0.83864100 0.69702800  
C 4.69050200 -2.78705800 -1.11995300  
H 4.83957400 -3.20560200 -2.11023100  
H -0.85664200 -0.30680200 -1.28568200  
C 5.64834400 -2.89678800 -0.12128100  
C 5.42421900 -2.33965700 1.14964200  
H 6.57936000 -3.41785300 -0.32893900  
H 0.78300200 -1.39008000 -2.49127300  
C -2.65595900 -1.29320700 3.18201100  
C -1.11547500 -0.48722100 0.82148200  
N -2.14812300 -1.66029100 4.16905300  
C -2.50587600 -0.48999300 0.84448500  
C -3.27388100 -0.85886600 1.97954700  
H -0.59515300 -0.69605300 1.74890000  
C -3.27810900 -0.03958300 -0.36003300  
C -3.73916000 -0.90269000 -1.36251600  
C -3.57839800 1.32678500 -0.49307600  
C -4.47497600 -0.43757300 -2.45373700  
C -4.31318100 1.80529700 -1.57619800  
H -3.19926900 2.00338100 0.26741000  
C -4.76491300 0.92120000 -2.55703200  
H -4.81495200 -1.14033900 -3.20733900  
H -4.53178900 2.86700900 -1.65261700  
C -4.69248400 -0.83686200 1.97273300  
N -5.86223900 -0.82444800 1.98956800  
H -5.34020500 1.28382800 -3.40510700  
H 6.18254200 -2.43047100 1.92223000  
Cl -3.38885300 -2.63072700 -1.28518800  
H -0.99702000 1.90337100 -1.14561200

TS<sub>3g</sub>

Imaginary Freq = -277.05

Charge = -1 multiplicity= 1

|   |             |             |             |
|---|-------------|-------------|-------------|
| C | 2.38343900  | 3.46017300  | -0.54054300 |
| C | 1.41394300  | 2.60414100  | 1.51035700  |
| O | -1.86593400 | 1.44352800  | 2.28801200  |
| C | -0.92014700 | 1.79490100  | 1.58725900  |
| O | -0.02302900 | 2.91990000  | -1.77052200 |
| O | 2.47609800  | 2.87257000  | 2.06207700  |
| H | 2.61419100  | 4.43444300  | -0.09961600 |
| N | 1.24795000  | 2.84412200  | 0.14234200  |
| C | 0.06041500  | 2.60021400  | -0.58162700 |
| N | 0.32289100  | 2.07747100  | 2.18644000  |
| H | 2.10009400  | 3.57555700  | -1.58526200 |
| C | -0.97335600 | 1.87095200  | 0.13409100  |
| C | 0.45765900  | 1.77456600  | 3.61058500  |
| H | 1.46369000  | 2.05279700  | 3.91677400  |
| H | 0.29083100  | 0.70605600  | 3.76711000  |
| H | -0.28798800 | 2.33271500  | 4.18254200  |
| H | 3.26898000  | 2.82627900  | -0.44505900 |
| C | 3.90815700  | -1.36558500 | 0.25343100  |
| H | 3.71592300  | -1.51143500 | 1.31050000  |
| C | 0.48216000  | -0.26826900 | -0.94620800 |
| O | 1.31184300  | -0.78562200 | 1.23907900  |
| C | 0.85218600  | -0.08272500 | -2.23868600 |
| C | -0.93825600 | -0.01893300 | -0.57485500 |
| O | 2.09146400  | -0.29225000 | -2.75533700 |
| C | 3.08158200  | -0.72522000 | -1.92317800 |
| C | 2.84883100  | -0.92678100 | -0.55802900 |
| C | 1.50736100  | -0.67301500 | 0.03051200  |
| C | 4.34036400  | -0.95402600 | -2.49125000 |
| H | 4.48309500  | -0.78489700 | -3.55356700 |
| H | -1.52109500 | 0.27409900  | -1.44590100 |
| C | 5.37769600  | -1.39164800 | -1.68204200 |
| C | 5.15001200  | -1.59431600 | -0.31126800 |

H 6.36146200 -1.57681900 -2.09985100  
H 0.17656900 0.26907500 -3.00802600  
C -2.71143100 -3.22590900 1.75198500  
C -1.57937500 -0.97496300 0.27493200  
N -2.05163100 -3.94793300 2.39261400  
C -2.93816600 -1.27923100 0.23568900  
C -3.51033000 -2.35912700 0.95909900  
H -0.96048200 -1.51581700 0.98146700  
C -3.87277700 -0.46215700 -0.60500100  
C -4.32723200 -0.92941500 -1.84562500  
C -4.31809700 0.78602600 -0.14369500  
C -5.19886900 -0.16017800 -2.61816300  
C -5.19541500 1.55029400 -0.91512100  
H -3.96330200 1.14411600 0.81892600  
C -5.63577100 1.08174900 -2.15462200  
H -5.54173300 -0.53550600 -3.57961500  
H -5.53640500 2.51422000 -0.54471500  
C -4.89903100 -2.65075400 0.92281000  
N -6.03712400 -2.92136100 0.90822800  
H -6.31804300 1.67961300 -2.75452900  
H -1.96912200 2.07258400 -0.24182600  
Cl 6.48528400 -2.15117200 0.69534300  
H -3.99794700 -1.90283600 -2.19906400

TS<sub>3h</sub>

Imaginary Freq = -277.19

Charge = -1 multiplicity= 1

C -2.53979500 -3.55767600 0.27260800  
C -1.85950300 -2.14331800 2.12091400  
O 1.24206600 -0.56362000 2.89243000  
C 0.40423700 -1.15613600 2.21692800  
O -0.03438000 -3.16098200 -0.80477000  
O -2.96350600 -2.34780300 2.61473600  
H -2.77376200 -4.40477400 0.92411700  
N -1.52341900 -2.70483200 0.88470400

C -0.27330000 -2.55815900 0.24490300  
N -0.88252100 -1.37992400 2.74369700  
H -2.13029700 -3.90935100 -0.67273500  
C 0.63049000 -1.59034400 0.84535200  
C -1.19736000 -0.74161300 4.02097900  
H -2.21490600 -1.01700400 4.28933700  
H -1.10968900 0.34211100 3.91159900  
H -0.49253600 -1.07422800 4.78725600  
H -3.45960700 -2.98938000 0.11088000  
C -4.39950500 1.13391500 -0.37260200  
H -4.34574700 1.55135700 0.62663100  
C -0.79521600 0.07613100 -0.89438500  
O -1.91228300 1.04413600 0.98892000  
C -0.99418700 -0.45250600 -2.12822200  
C 0.58142600 0.04894800 -0.32612400  
O -2.17154000 -0.48387600 -2.80651100  
C -3.27880800 0.05262400 -2.21814200  
C -3.22560900 0.60331900 -0.93268300  
C -1.95294400 0.61996500 -0.16435500  
C -4.47068900 0.02397200 -2.95181000  
H -4.47338300 -0.41309500 -3.94502100  
H 1.28207300 -0.40059300 -1.02716200  
C -5.62242200 0.55479700 -2.39135800  
C -5.57499000 1.10730900 -1.10123300  
H -6.55744800 0.54481600 -2.94116000  
H -0.21113000 -0.92329700 -2.70899300  
C 1.84219200 3.91748300 1.16486800  
C 1.05813500 1.24289200 0.30283400  
N 1.06003000 4.72032300 1.49793300  
C 2.38870300 1.65676900 0.30645000  
C 2.79104900 2.94791200 0.74311400  
H 0.32639500 1.88909500 0.77373900  
C 3.47168000 0.73988900 -0.17352800  
C 4.09715400 0.93166000 -1.40803000  
C 3.90300500 -0.32828000 0.63305700



|    |             |             |             |
|----|-------------|-------------|-------------|
| C  | 5.11543700  | 0.08148200  | -1.85047500 |
| H  | 3.79012900  | 1.76307100  | -2.03660600 |
| C  | 4.91988200  | -1.17566400 | 0.20857400  |
| H  | 3.42804900  | -0.47993300 | 1.59855900  |
| C  | 5.53069600  | -0.97636600 | -1.03664800 |
| H  | 5.57602700  | 0.26224900  | -2.81542900 |
| H  | 5.26226000  | -1.99824800 | 0.82951800  |
| C  | 7.19031900  | -1.68925900 | -2.59721400 |
| H  | 7.93815200  | -2.48396300 | -2.65452600 |
| H  | 6.50398600  | -1.77941600 | -3.45128900 |
| H  | 7.69470700  | -0.71429400 | -2.64990800 |
| O  | 6.52214200  | -1.86844400 | -1.36461000 |
| C  | 4.15021100  | 3.35646700  | 0.76847800  |
| N  | 5.25947100  | 3.72778300  | 0.79345000  |
| Cl | -7.05305100 | 1.77540200  | -0.41169300 |
| H  | 1.67195100  | -1.80294800 | 0.63643500  |

TS<sub>3i</sub>

Imaginary Freq = -278.75

Charge = -1 multiplicity= 1

|   |             |            |             |
|---|-------------|------------|-------------|
| C | 2.98465200  | 2.76505100 | -2.16787700 |
| C | 2.38017900  | 2.98435800 | 0.17107700  |
| O | -0.75578700 | 2.69790300 | 1.85961900  |
| C | 0.06702500  | 2.59766700 | 0.95328200  |
| O | 0.36125500  | 2.05866900 | -2.65278600 |
| O | 3.54013700  | 3.31200600 | 0.39814400  |
| H | 3.35483900  | 3.79257800 | -2.23212300 |
| N | 1.97046500  | 2.65040400 | -1.12324100 |
| C | 0.65658300  | 2.27198200 | -1.47358400 |
| N | 1.41904700  | 2.94852400 | 1.16714300  |
| H | 2.50981000  | 2.47411700 | -3.10337200 |
| C | -0.25101000 | 2.05566400 | -0.35994500 |
| C | 1.87033000  | 3.25789800 | 2.52213600  |
| H | 2.33871000  | 4.24520100 | 2.55059800  |
| H | 2.59786200  | 2.50937200 | 2.84651800  |

H 0.99067200 3.23076800 3.16248800  
H 3.83299200 2.11258100 -1.94361600  
C 4.43448700 -1.36991500 0.51388500  
H 4.42229300 -1.02436200 1.54150800  
C 0.90459200 -0.50493000 -0.56725100  
O 2.07415200 -0.13401700 1.48846300  
C 1.05114100 -0.93958900 -1.84490800  
C -0.41780100 0.04156700 -0.15974700  
O 2.17144500 -1.49259800 -2.37871900  
C 3.27135700 -1.63614100 -1.58534100  
C 3.27035400 -1.20375200 -0.25438500  
C 2.06315500 -0.57009100 0.33880300  
C 4.40167400 -2.22947900 -2.15983700  
H 4.36495100 -2.55088700 -3.19561900  
H -1.12442900 0.00237400 -0.98572500  
C 5.54389500 -2.39295700 -1.39107100  
C 5.54867000 -1.95965500 -0.05538600  
H 6.43149500 -2.85111800 -1.81405800  
H 0.26605900 -0.88203500 -2.58803400  
C -1.97264400 -1.47655500 3.60954600  
C -0.95377600 -0.36026300 1.10218500  
N -1.27131500 -1.88733000 4.45002400  
C -2.31404400 -0.46209000 1.37122600  
C -2.82857000 -0.99029800 2.58579000  
H -0.25747600 -0.60991900 1.89441800  
C -3.31997500 0.03427400 0.37294800  
C -3.91155700 -0.82682500 -0.55811300  
C -3.67666000 1.39401800 0.38402400  
C -4.85604800 -0.32439400 -1.48205800  
C -4.61930700 1.87710100 -0.51548900  
H -3.19230100 2.05094700 1.09989000  
C -5.21349000 1.02413500 -1.45134700  
H -4.89781200 2.92754300 -0.49993000  
C -4.22032100 -1.11002400 2.82531100  
N -5.36622400 -1.23723400 3.03059800

|    |             |             |             |
|----|-------------|-------------|-------------|
| Cl | 7.01336400  | -2.17914700 | 0.90055700  |
| H  | -5.94039400 | 1.41874200  | -2.15273700 |
| O  | -3.51268400 | -2.14064300 | -0.61586000 |
| O  | -5.35488000 | -1.23839100 | -2.37766100 |
| C  | -4.47988300 | -3.10627300 | -0.18476500 |
| H  | -4.87607900 | -2.84963800 | 0.80312500  |
| H  | -5.30164400 | -3.18955800 | -0.90465900 |
| H  | -3.94437300 | -4.05766500 | -0.12841600 |
| C  | -6.29904000 | -0.78404900 | -3.32584000 |
| H  | -5.87990200 | -0.00301600 | -3.97572300 |
| H  | -6.55873500 | -1.65445300 | -3.93307200 |
| H  | -7.20770100 | -0.39540700 | -2.84467200 |
| H  | -1.29276100 | 2.18675000  | -0.62710800 |

**Table 14:** Thermodynamic parameters for Products **f-i** at b3lyp/6-31g (d) level of theory

| Product                     | G            | H            | S       | E            |
|-----------------------------|--------------|--------------|---------|--------------|
| P <sub>f</sub>              | -1526.729636 | -1526.653288 | 160.688 | -1526.939590 |
| P <sub>g</sub>              | -1526.732196 | -1526.656280 | 159.778 | -1526.942710 |
| P <sub>h</sub>              | -1641.227897 | -1641.146116 | 172.124 | -1641.468026 |
| P <sub>i</sub>              | -1755.709158 | -1755.619530 | 188.638 | -1755.976381 |
| 1,3-Dimethylbarbituric Acid | -568.034635  | -567.988045  | 98.056  | -568.133785  |

P<sub>f</sub>

Charge= 0 multiplicity= 1

C 4.49130300 -1.76654400 -0.71421100  
H 3.88371900 -2.58384600 -1.08863000  
C 1.80757000 0.79504500 0.11152200  
O 1.66097900 -1.41474300 -0.80091100  
C 2.67970900 1.74824000 0.55747500  
C 0.39422700 1.12976200 0.13734600  
O 4.01302700 1.63364200 0.61019300  
C 4.60071200 0.46294300 0.18719000  
C 3.82829000 -0.59916000 -0.29744700  
C 2.35339100 -0.49404700 -0.37057100  
C 5.99304100 0.39373600 0.26626300  
H 6.54810000 1.24387000 0.64869000  
H 0.17868300 2.12345900 0.51874800  
C 6.62281200 -0.77154000 -0.15180300  
C 5.87324000 -1.85407300 -0.64279400  
H 7.70524600 -0.84202700 -0.09703700  
H 2.35981500 2.72066400 0.91814900  
C -1.82110600 3.12675800 -0.31794500  
C -0.63042200 0.32289600 -0.23991100  
N -1.21876400 4.12124500 -0.38696900  
C -2.04576700 0.65513100 -0.22386000  
C -2.59145700 1.92359800 -0.23203400

|    |             |             |             |
|----|-------------|-------------|-------------|
| H  | -0.39235800 | -0.68496500 | -0.55855800 |
| C  | -2.97885200 | -0.51034500 | -0.29931100 |
| C  | -3.77307600 | -0.68653900 | -1.44420700 |
| C  | -3.06560400 | -1.48037300 | 0.71283900  |
| C  | -4.61162500 | -1.78955800 | -1.58065500 |
| H  | -3.71513000 | 0.05252600  | -2.23731800 |
| C  | -3.90940200 | -2.58312600 | 0.59081800  |
| C  | -4.67868800 | -2.73901300 | -0.56126000 |
| H  | -5.21088700 | -1.90335600 | -2.47873200 |
| H  | -3.96173800 | -3.30552100 | 1.39812900  |
| C  | -4.00575700 | 2.14191800  | -0.15212200 |
| N  | -5.14585700 | 2.36777500  | -0.08492100 |
| H  | 6.37908000  | -2.75880300 | -0.96612500 |
| H  | -5.33253400 | -3.60120100 | -0.65496900 |
| Cl | -2.14570200 | -1.30525900 | 2.20086500  |

P<sub>g</sub>

Charge= 0 multiplicity= 1

|   |             |             |             |
|---|-------------|-------------|-------------|
| C | -3.92473700 | 0.99945900  | -0.32388600 |
| H | -3.48117600 | 1.92883000  | -0.66255900 |
| C | -0.83380400 | -1.10465900 | 0.32345800  |
| O | -1.08990400 | 1.14837400  | -0.44928600 |
| C | -1.51784600 | -2.21300600 | 0.73491400  |
| C | 0.61861700  | -1.19062600 | 0.29987600  |
| O | -2.85129500 | -2.33193400 | 0.81564200  |
| C | -3.63772400 | -1.26320800 | 0.46144500  |
| C | -3.07182300 | -0.06079700 | 0.02425800  |
| C | -1.60110500 | 0.09584500  | -0.07246400 |
| C | -5.02077100 | -1.43409600 | 0.55916800  |
| H | -5.42059100 | -2.38256700 | 0.90162500  |
| H | 1.01537200  | -2.13340300 | 0.66720800  |
| C | -5.85260600 | -0.37968900 | 0.21252800  |
| C | -5.29588400 | 0.83306900  | -0.22751600 |
| H | -6.92979800 | -0.48609000 | 0.27880200  |
| H | -1.02891200 | -3.13354600 | 1.03648900  |

|    |             |             |             |
|----|-------------|-------------|-------------|
| C  | 2.95917300  | -2.76170600 | -0.65872100 |
| C  | 1.47848500  | -0.22851900 | -0.11312600 |
| N  | 2.46761900  | -3.78050100 | -0.93677900 |
| C  | 2.93602600  | -0.33933000 | -0.12638800 |
| C  | 3.61048500  | -1.53261900 | -0.31668700 |
| H  | 1.07200300  | 0.72820200  | -0.41895100 |
| C  | 3.67213100  | 0.93618700  | 0.05370800  |
| C  | 4.80687800  | 1.25691400  | -0.71220600 |
| C  | 3.20108400  | 1.87678400  | 0.98865600  |
| C  | 5.45871800  | 2.47488000  | -0.53410600 |
| H  | 5.16587100  | 0.56460900  | -1.46565400 |
| C  | 3.86385600  | 3.08689700  | 1.17449300  |
| C  | 4.99463800  | 3.38963900  | 0.41283200  |
| H  | 6.32825600  | 2.71020800  | -1.14087500 |
| C  | 5.02964800  | -1.66670900 | -0.17014900 |
| N  | 6.17487500  | -1.83930600 | -0.04914900 |
| H  | 3.49533700  | 3.79484100  | 1.91138100  |
| H  | 5.50757800  | 4.33728200  | 0.55187000  |
| Cl | -6.36790500 | 2.15207100  | -0.65951500 |
| H  | 2.32194100  | 1.64530500  | 1.58255700  |

P<sub>h</sub>

Charge= 0 multiplicity= 1

|   |            |             |             |
|---|------------|-------------|-------------|
| C | 4.28100700 | -1.30719300 | -0.34880200 |
| H | 3.70011200 | -2.14352500 | -0.72067600 |
| C | 1.55293600 | 1.23591200  | 0.35076500  |
| O | 1.45993400 | -1.00376600 | -0.49462000 |
| C | 2.39813100 | 2.20836800  | 0.80296200  |
| C | 0.13148700 | 1.54938400  | 0.32235100  |
| O | 3.73350800 | 2.11317300  | 0.89535000  |
| C | 4.34530900 | 0.94617800  | 0.51001900  |
| C | 3.60194600 | -0.13734500 | 0.02975900  |
| C | 2.12597800 | -0.05698400 | -0.08043000 |
| C | 5.73705000 | 0.89326200  | 0.62091100  |
| H | 6.27751100 | 1.75534700  | 0.99702500  |

H -0.11830800 2.52635700 0.72819400  
C 6.39615000 -0.26740500 0.24391900  
C 5.66001500 -1.36235200 -0.23936000  
H 7.47589400 -0.33446400 0.31959900  
H 2.05703100 3.18434500 1.13217900  
C -1.87886400 3.49294100 -0.67382400  
C -0.86237100 0.75430900 -0.13895700  
N -1.21736200 4.41082500 -0.95213900  
C -2.28506600 1.10003500 -0.15519800  
C -2.73747900 2.39939200 -0.33118700  
H -0.60778400 -0.23972600 -0.48685900  
C -3.21760100 -0.03241300 0.00195900  
C -4.43513900 -0.11477300 -0.69480100  
C -2.87464000 -1.10804200 0.85158100  
C -5.28861600 -1.20380000 -0.54445600  
H -4.71614100 0.66758300 -1.39035600  
C -3.72113800 -2.18884300 1.02207300  
C -4.94060100 -2.24636100 0.32574200  
H -6.21142500 -1.23275800 -1.11148000  
C -4.10653100 2.78742400 -0.16969200  
N -5.20181800 3.16061100 -0.03551900  
H -3.46464800 -3.00596600 1.68840700  
Cl 6.51575700 -2.81969300 -0.70927400  
H -1.93816600 -1.07781300 1.40002800  
O -5.69833400 -3.34735000 0.55493000  
C -6.95164300 -3.46264300 -0.10900000  
H -6.82572600 -3.49561100 -1.19845200  
H -7.38284900 -4.40413000 0.23424200  
H -7.62187800 -2.63567200 0.15614100

P<sub>i</sub>

Charge= 0 multiplicity= 1

C 4.61492100 -1.24704600 -0.18354500  
H 4.06541200 -2.12553700 -0.50207500  
C 1.82207300 1.30743200 0.10170500

O 1.80815100 -1.00369100 -0.53414100  
C 2.63182100 2.33485900 0.49711700  
C 0.40260300 1.59952700 -0.03008100  
O 3.96072100 2.27170700 0.67251700  
C 4.60589000 1.08163500 0.44509100  
C 3.90289900 -0.05604900 0.03463700  
C 2.43510000 -0.01106600 -0.16948300  
C 5.98900400 1.06217700 0.64180700  
H 6.49752000 1.96606600 0.95986700  
H 0.13792100 2.62304000 0.21439100  
C 6.68080000 -0.11994900 0.42340600  
C 5.98542800 -1.26924400 0.01116100  
H 7.75466900 -0.16216600 0.56865700  
H 2.26140100 3.33255800 0.70895000  
C -1.93385300 3.45478900 -0.50632200  
C -0.56482300 0.72307200 -0.40288900  
N -1.39267200 4.48401300 -0.43313900  
C -1.99533400 0.97275500 -0.53130600  
C -2.61817200 2.20246300 -0.59545100  
H -0.26641400 -0.30133400 -0.59055700  
C -2.82316800 -0.26409000 -0.65866700  
C -2.59264800 -1.13837100 -1.73681300  
C -3.79842500 -0.58293200 0.29805800  
C -3.34382300 -2.29738600 -1.86736000  
H -1.83521700 -0.88983800 -2.47376200  
C -4.56067600 -1.76657300 0.15591300  
C -4.32770300 -2.61669000 -0.92638200  
H -3.17346500 -2.96300200 -2.70827600  
C -4.02718700 2.33088700 -0.81834800  
N -5.16064800 2.48939500 -1.02972000  
H -4.90811500 -3.52416800 -1.04599700  
Cl 6.88183200 -2.75281800 -0.25842300  
O -4.03650000 0.27989400 1.33386200  
O -5.49630500 -1.98102300 1.12367400  
C -3.65435600 -0.17657200 2.63618200



|   |             |             |            |
|---|-------------|-------------|------------|
| H | -4.22014800 | -1.06563600 | 2.92803500 |
| H | -2.57834500 | -0.39221500 | 2.67168100 |
| H | -3.88277700 | 0.64523700  | 3.31787100 |
| C | -6.34957500 | -3.10905700 | 0.99460500 |
| H | -7.03362800 | -3.06177800 | 1.84342100 |
| H | -6.92496500 | -3.06967400 | 0.06110700 |
| H | -5.78508300 | -4.05000900 | 1.03437900 |

**Table 15:** Thermodynamic parameters for TS<sub>4</sub> at b3lyp/6-31g (d) level of theory

| TS <sub>4</sub>  | G            | H            | S       | E            |
|------------------|--------------|--------------|---------|--------------|
| TS <sub>4a</sub> | -1635.666274 | -1635.572421 | 197.531 | -1636.029157 |
| TS <sub>4b</sub> | -1750.161198 | -1750.061460 | 209.917 | -1750.553669 |
| TS <sub>4c</sub> | -1864.641600 | -1864.534297 | 225.838 | -1865.061515 |
| TS <sub>4d</sub> | -2095.271219 | -2095.173914 | 204.795 | -2095.622121 |
| TS <sub>4e</sub> | -2554.873752 | -2554.772871 | 212.322 | -2555.212439 |

TS<sub>4a</sub>

Imaginary Freq = -305.65

Charge = 0 multiplicity= 1

C -0.62636300 -0.42001500 3.44827900  
C -1.82024000 -1.74347700 1.76047800  
O -0.73131600 -3.06085600 -1.40403800  
C -0.67228500 -2.44435500 -0.32398600  
O 1.58408500 -0.68514500 1.94226500  
O -2.84882800 -1.72015300 2.42096700  
H -1.59489500 -0.56643100 3.92079100  
N -0.63885400 -1.13990300 2.17018200  
C 0.56875300 -1.16820800 1.44923500  
N -1.78223300 -2.40483400 0.52723400  
H -0.44816100 0.64245400 3.26236400  
C 0.48620500 -1.69259000 0.09240700  
C -3.01265900 -3.09881300 0.13510000  
H -3.30798700 -3.79924500 0.91901700  
H -2.80648100 -3.62509900 -0.79429100  
H -3.82457600 -2.37998400 -0.00477900  
H 0.17570300 -0.80784600 4.07879200  
C -3.83624100 2.71607700 0.59206300  
H -3.24429700 3.21663800 1.35114600  
C -1.18655300 0.57610100 -1.09055300  
O -1.05214700 2.08849700 0.75945000

C -2.03923700 -0.00596300 -1.98721300  
C 0.21419200 0.17630500 -1.14012700  
O -3.34976400 0.23968700 -2.08981100  
C -3.93286700 1.14943300 -1.23272000  
C -3.17883700 1.80628000 -0.25325900  
C -1.72907100 1.54283300 -0.10975500  
C -5.30110300 1.37321200 -1.39203100  
H -5.84290900 0.83898400 -2.16536900  
H 0.44897800 -0.49405700 -1.96550200  
C -5.92606500 2.27936200 -0.54424200  
C -5.19527700 2.95216600 0.44909100  
H -6.99065200 2.46458900 -0.65316000  
H -1.72358200 -0.75601400 -2.70471100  
C 1.78608700 -1.97261300 -0.60097300  
C 1.28453700 0.95341600 -0.63338700  
N 2.01483700 -3.26048100 -0.90099700  
C 2.56151000 0.42177000 -0.57094300  
C 2.75965900 -0.99002000 -0.84864700  
H 1.06781100 1.89652800 -0.15013300  
C 3.70313200 1.27297800 -0.18990500  
C 4.73274300 0.77689900 0.62991600  
C 3.76597900 2.61051500 -0.62125400  
C 5.79135600 1.59830600 1.00787700  
H 4.67547700 -0.24176100 0.99807100  
C 4.83071900 3.42656400 -0.24932700  
H 2.98605500 2.99612500 -1.27143800  
C 5.84641900 2.92253300 0.56683400  
H 6.57293600 1.20517900 1.65183300  
H 4.87193200 4.45390000 -0.60069100  
C 3.99916600 -1.45759900 -1.37411500  
N 4.96267800 -1.93141800 -1.83216400  
H 6.67771300 3.55929800 0.85731200  
H 1.20283400 -3.85970800 -1.00353100  
H 2.84851700 -3.50567500 -1.42512600  
H -5.69760100 3.65575700 1.10589300

TS<sub>4b</sub>

Imaginary Freq = -319.62

Charge = 0 multiplicity= 1

|   |             |             |             |
|---|-------------|-------------|-------------|
| C | -1.09804100 | -0.30452800 | 3.45033400  |
| C | -2.57443100 | -1.42633900 | 1.84171500  |
| O | -1.84624400 | -3.08634800 | -1.26417300 |
| C | -1.63961300 | -2.44337800 | -0.21877000 |
| O | 0.97753500  | -1.09138200 | 1.93414100  |
| O | -3.56217400 | -1.16186300 | 2.51204300  |
| H | -2.06617300 | -0.22363200 | 3.93918400  |
| N | -1.28606900 | -1.06103300 | 2.20776900  |
| C | -0.12563900 | -1.37089900 | 1.47543700  |
| N | -2.69905200 | -2.13770100 | 0.64245300  |
| H | -0.70526200 | 0.68752600  | 3.21231700  |
| C | -0.34272900 | -1.92018100 | 0.14167600  |
| C | -4.05373600 | -2.58074900 | 0.29926900  |
| H | -4.46857700 | -3.17138800 | 1.11869700  |
| H | -3.98015900 | -3.17769600 | -0.60709200 |
| H | -4.70425900 | -1.71716900 | 0.13655600  |
| H | -0.38240900 | -0.82391500 | 4.09023600  |
| C | -3.63691200 | 3.29922500  | 0.50688500  |
| H | -2.93481100 | 3.69327900  | 1.23417800  |
| C | -1.54070300 | 0.57422300  | -1.10898100 |
| O | -1.04656600 | 2.10343400  | 0.66531800  |
| C | -2.51691600 | 0.15134300  | -1.96661100 |
| C | -0.25554400 | -0.11836200 | -1.15902100 |
| O | -3.74860600 | 0.66641700  | -2.06446500 |
| C | -4.10548000 | 1.71383200  | -1.24267200 |
| C | -3.20714000 | 2.23535400  | -0.30441300 |
| C | -1.84311600 | 1.67560200  | -0.16821100 |
| C | -5.39834900 | 2.21781800  | -1.39362600 |
| H | -6.05872300 | 1.77945200  | -2.13442800 |
| H | -0.18938700 | -0.85129900 | -1.96186100 |
| C | -5.79710100 | 3.27100000  | -0.58011600 |
| C | -4.91753800 | 3.81357900  | 0.37157100  |

|   |             |             |             |
|---|-------------|-------------|-------------|
| H | -6.80027800 | 3.67423800  | -0.68315900 |
| H | -2.38397300 | -0.67752900 | -2.65379300 |
| C | 0.85787800  | -2.50617600 | -0.54404100 |
| C | 0.96683700  | 0.45002000  | -0.72063300 |
| N | 0.80689900  | -3.83113000 | -0.76425700 |
| C | 2.11270000  | -0.32591600 | -0.65648200 |
| C | 2.00359900  | -1.76299800 | -0.86370600 |
| H | 0.95716700  | 1.43632500  | -0.27725200 |
| C | 3.41152000  | 0.28414200  | -0.34759100 |
| C | 4.37918600  | -0.39195000 | 0.42622100  |
| C | 3.71702500  | 1.58053100  | -0.79413200 |
| C | 5.58752500  | 0.20518400  | 0.73915700  |
| H | 4.15674200  | -1.37983500 | 0.81430000  |
| C | 4.93295700  | 2.18896800  | -0.49589700 |
| C | 5.87822700  | 1.49995500  | 0.27755200  |
| H | 6.32670700  | -0.30600000 | 1.34730400  |
| H | 5.13713500  | 3.18429200  | -0.87300300 |
| C | 3.09775600  | -2.50197600 | -1.39988900 |
| N | 3.92620100  | -3.18443700 | -1.85906900 |
| H | -0.11553100 | -4.24630500 | -0.83980800 |
| H | 1.55937700  | -4.27160200 | -1.28340600 |
| H | 2.99825900  | 2.11238900  | -1.41060300 |
| O | 7.09423200  | 1.99283900  | 0.63138500  |
| C | 7.44784300  | 3.30085600  | 0.20415000  |
| H | 6.75458700  | 4.05396100  | 0.60018300  |
| H | 8.44702300  | 3.48390100  | 0.60269900  |
| H | 7.47475000  | 3.37230200  | -0.89076100 |
| H | -5.24384600 | 4.63496100  | 1.00219200  |

TS<sub>4c</sub>

Imaginary Freq = -294.77

Charge = 0 multiplicity= 1

|   |            |            |             |
|---|------------|------------|-------------|
| C | 1.94611400 | 0.84400300 | 3.40502200  |
| C | 3.08817200 | 1.73306900 | 1.42278200  |
| O | 1.78478000 | 2.88262900 | -1.72610100 |

C 1.78103300 2.41127700 -0.57365800  
O -0.38365300 1.35369000 2.17002700  
O 4.18306500 1.58494400 1.94735400  
H 2.98386800 0.85865900 3.73011100  
N 1.89308900 1.41159600 2.05367700  
C 0.61481400 1.59102700 1.49288600  
N 2.98342100 2.25214600 0.12837600  
H 1.56737800 -0.18144800 3.38216400  
C 0.58656600 1.95592100 0.08721800  
C 4.24287400 2.65010200 -0.50677000  
H 4.77051800 3.36232600 0.13109500  
H 3.99411900 3.10124100 -1.46492100  
H 4.88688600 1.77822200 -0.65088400  
H 1.32127700 1.43671900 4.07553800  
C 4.05390000 -3.18367600 0.69271600  
H 3.48008200 -3.47961100 1.56469700  
C 1.64983000 -0.74968300 -0.95876300  
O 1.47851900 -1.99873300 1.07484000  
C 2.47603000 -0.43840900 -2.00380500  
C 0.35204200 -0.09582600 -0.91372500  
O 3.69738300 -0.94161500 -2.20745900  
C 4.20646900 -1.85791500 -1.31011800  
C 3.47381800 -2.25192300 -0.18440700  
C 2.12708200 -1.69447700 0.07629700  
C 5.47929400 -2.36070500 -1.58240700  
H 6.00846600 -2.02351700 -2.46743500  
H 0.13904100 0.52641200 -1.78139300  
C 6.02877600 -3.28262600 -0.69989500  
C 5.31752300 -3.69575800 0.43876500  
H 7.01894500 -3.68354100 -0.89572000  
H 2.21425000 0.28166900 -2.77208600  
C -0.73085900 2.39407500 -0.47853500  
C -0.76744800 -0.57154800 -0.19299000  
N -0.78633000 3.67643700 -0.86490700  
C -1.90579300 0.20203500 -0.09942400

|   |             |             |             |
|---|-------------|-------------|-------------|
| C | -1.88482000 | 1.58676000  | -0.50873200 |
| H | -0.70012200 | -1.50362500 | 0.35262700  |
| C | -3.14115500 | -0.37329300 | 0.51172800  |
| C | -3.23933100 | -0.46873200 | 1.90818400  |
| C | -4.17470200 | -0.83915100 | -0.31135100 |
| C | -4.38005000 | -1.02076500 | 2.47802300  |
| H | -2.42730800 | -0.08747900 | 2.51771200  |
| C | -5.31524500 | -1.43131300 | 0.27894900  |
| C | -5.41453000 | -1.50118000 | 1.67072700  |
| H | -4.47168600 | -1.08630900 | 3.55833700  |
| C | -3.10214700 | 2.24911300  | -0.84067500 |
| N | -4.04436600 | 2.86155000  | -1.15573400 |
| H | -6.28949000 | -1.94472500 | 2.13193900  |
| O | -3.97251100 | -0.77097300 | -1.66508100 |
| O | -6.25336200 | -1.92842600 | -0.58478500 |
| C | -5.00917700 | -0.22711600 | -2.49623200 |
| H | -5.79970900 | -0.95874000 | -2.67388400 |
| H | -5.42863600 | 0.68132300  | -2.05311000 |
| H | -4.51823000 | 0.02921300  | -3.43813800 |
| C | -7.42053800 | -2.52045900 | -0.03849200 |
| H | -8.02183200 | -2.83682200 | -0.89286800 |
| H | -7.17762000 | -3.39622700 | 0.57759400  |
| H | -7.99418600 | -1.80358500 | 0.56365500  |
| H | 5.76033100  | -4.41538300 | 1.12055800  |
| H | 0.08919800  | 4.13066800  | -1.09706900 |
| H | -1.63126500 | 4.03338400  | -1.29867500 |

TS<sub>4d</sub>

Imaginary Freq = -307.53

Charge = 0 multiplicity= 1

|   |             |             |             |
|---|-------------|-------------|-------------|
| C | -0.32652400 | -0.38335900 | 3.39889900  |
| C | -1.17013500 | -2.05756000 | 1.81364300  |
| O | 0.31059400  | -3.45040400 | -1.15365900 |
| C | 0.19866900  | -2.73371400 | -0.14177000 |
| O | 1.97438900  | -0.37874200 | 2.00829500  |

O -2.22224800 -2.15857600 2.42786900  
H -1.27979600 -0.65609100 3.84569900  
N -0.14037300 -1.21058700 2.20149700  
C 1.09105500 -1.08644000 1.53282500  
N -0.94546800 -2.81746300 0.65933300  
H -0.32604000 0.67178400 3.11294500  
C 1.17890000 -1.74565300 0.23659200  
C -2.00666900 -3.76272000 0.29885100  
H -2.21331300 -4.42551200 1.14162900  
H -1.65791600 -4.33006500 -0.56123400  
H -2.92642700 -3.22450700 0.05411300  
H 0.49376200 -0.56015700 4.09687400  
C -3.87063300 1.84043200 0.11165600  
H -3.42443400 2.52052800 0.82820800  
C -0.80576200 0.05501800 -1.23380800  
O -1.04513100 1.75196000 0.43901500  
C -1.49230300 -0.76391200 -2.08681400  
C 0.64572000 -0.08361000 -1.19244300  
O -2.81997100 -0.77652100 -2.25756900  
C -3.59802300 0.09418900 -1.52894500  
C -3.02774300 0.97770400 -0.60665300  
C -1.56174400 1.00207200 -0.38550700  
C -4.97533700 0.04959300 -1.75308100  
H -5.37902900 -0.65111800 -2.47607300  
H 1.03963400 -0.77684200 -1.93393500  
C -5.79794900 0.90861500 -1.03861300  
C -5.23738000 1.80043200 -0.10935600  
H -6.87129100 0.89447200 -1.19268700  
H -1.01119300 -1.51405000 -2.70524100  
C 2.54412000 -1.84677200 -0.37610700  
C 1.53018500 0.92116700 -0.73282500  
N 3.01663900 -3.09272700 -0.52949000  
C 2.87751500 0.64077300 -0.57130200  
C 3.33847600 -0.73054900 -0.69129700  
H 1.12399000 1.85062100 -0.35739000



|    |             |             |             |
|----|-------------|-------------|-------------|
| C  | 3.82649100  | 1.72010000  | -0.24505800 |
| C  | 4.88663300  | 1.50387700  | 0.65381700  |
| C  | 3.66818800  | 2.99852000  | -0.81076600 |
| C  | 5.75941800  | 2.53908300  | 0.97732300  |
| H  | 4.99610400  | 0.53266500  | 1.12414100  |
| C  | 4.54839200  | 4.02888700  | -0.49262000 |
| H  | 2.86500200  | 3.16923100  | -1.52170300 |
| C  | 5.59645000  | 3.80187800  | 0.40291800  |
| H  | 6.56593900  | 2.36100000  | 1.68289200  |
| H  | 4.42106200  | 5.00743600  | -0.94727200 |
| C  | 4.66869500  | -1.01280200 | -1.11829600 |
| N  | 5.72448900  | -1.34619200 | -1.48799100 |
| H  | 6.28360000  | 4.60611500  | 0.65163000  |
| Cl | -6.29671700 | 2.87714400  | 0.77990100  |
| H  | 2.33426400  | -3.84044600 | -0.59272500 |
| H  | 3.90995200  | -3.23095900 | -0.99083700 |

TS<sub>4e</sub>

Imaginary Freq = -305.23

Charge = 0 multiplicity= 1

|   |             |             |             |
|---|-------------|-------------|-------------|
| C | 0.66598800  | 1.03559500  | 3.39191900  |
| C | 1.57268000  | 2.38727800  | 1.55354300  |
| O | 0.09523600  | 3.42670200  | -1.55682000 |
| C | 0.19100000  | 2.86333300  | -0.45068100 |
| O | -1.67207500 | 0.98978400  | 2.06990200  |
| O | 2.64807800  | 2.50037700  | 2.12361100  |
| H | 1.65306600  | 1.29505000  | 3.76748200  |
| N | 0.49838600  | 1.68676300  | 2.08780700  |
| C | -0.75850900 | 1.55478500  | 1.47199800  |
| N | 1.36506300  | 2.97955200  | 0.30259700  |
| H | 0.57535000  | -0.04689300 | 3.26973500  |
| C | -0.84374200 | 2.02398300  | 0.09753900  |
| C | 2.47736800  | 3.77901600  | -0.22006400 |
| H | 2.75464100  | 4.54625300  | 0.50579000  |
| H | 2.14240200  | 4.23209600  | -1.15057100 |

H 3.35009800 3.14438600 -0.39619000  
H -0.11159300 1.38011400 4.07611900  
C 3.93164500 -1.91445900 0.38299700  
H 3.46208000 -2.44372200 1.20426500  
C 0.96072100 -0.12439300 -1.15313900  
O 1.13164800 -1.55027200 0.76146200  
C 1.67557700 0.50569900 -2.13453800  
C -0.47299000 0.12043500 -1.10326800  
O 2.99383800 0.39280000 -2.33153100  
C 3.73086900 -0.41754800 -1.49693900  
C 3.12968400 -1.10690800 -0.43861600  
C 1.67456000 -0.98348500 -0.18306900  
C 5.09916800 -0.51261500 -1.75649000  
H 5.52778600 0.03895500 -2.58637800  
H -0.84508100 0.73498900 -1.92140100  
C 5.88117200 -1.31591000 -0.93883500  
C 5.28950900 -2.01304900 0.12739600  
H 6.94679600 -1.40758100 -1.11780600  
H 1.22892100 1.18814900 -2.84965800  
C -2.21611800 2.12942500 -0.49496700  
C -1.41072800 -0.73731500 -0.48191200  
N -2.61326600 3.36821600 -0.81407400  
C -2.72245200 -0.33168400 -0.33476900  
C -3.09548800 1.03744300 -0.62149000  
H -1.06959900 -1.65249300 -0.01726300  
C -3.75260300 -1.25144800 0.20453900  
C -4.48582500 -0.84035000 1.33389800  
C -4.03208100 -2.52400700 -0.32569900  
C -5.44311400 -1.66363400 1.91625700  
H -4.25191700 0.12671200 1.76625300  
C -5.00121100 -3.34983200 0.24288200  
C -5.70335100 -2.92017700 1.36752700  
H -5.98267300 -1.32558700 2.79577300  
H -5.20227100 -4.31826200 -0.20211500  
C -4.43450900 1.35001700 -0.99830400

|    |             |             |             |
|----|-------------|-------------|-------------|
| N  | -5.49446500 | 1.69879300  | -1.33987100 |
| H  | -6.45433900 | -3.56934300 | 1.80875200  |
| Cl | 6.29752800  | -3.02258700 | 1.14531400  |
| H  | -1.89033600 | 4.05843000  | -0.98490600 |
| H  | -3.51268700 | 3.50421700  | -1.26418800 |
| Cl | -3.21681000 | -3.11712000 | -1.77109000 |

**Table 16:** Thermodynamic parameters for TS annulation at b3lyp/6-31g (d) level of theory

| Annulation                 | G            | H            | S       | E            |
|----------------------------|--------------|--------------|---------|--------------|
| TS <sub>1</sub> annulation | -1750.115092 | -1750.013966 | 212.837 | -1750.502763 |
| TS <sub>2</sub> annulation | -1750.130478 | -1750.031584 | 208.140 | -1750.521607 |

TS1annulation

Charge=0 multiplicity=1

Imaginary Freq = -330.85

O 2.48264600 -0.96963800 1.68351800  
C 2.12250300 -0.88356000 -0.68800400  
O 2.36948200 1.76650500 0.74660200  
C 2.90905600 -1.12584300 0.53935900  
O -1.53590500 0.84352100 -1.75183900  
O -0.23672800 5.13760500 -0.87756400  
O 3.85553500 -1.84486700 -2.06898300  
N -0.92222400 2.98635800 -1.29850000  
C -0.70230300 1.60776800 -1.26450600  
N 1.10649100 3.44094900 -0.16039500  
C 0.77679100 -0.24488100 -0.77401300  
C 0.53210200 1.13928300 -0.62941700  
C 1.99962800 4.45406500 0.41371500  
H 2.24419200 5.19372600 -0.35001900  
H 2.89397300 3.94398700 0.76350100  
H 1.50941400 4.96751900 1.24597800  
C 2.63857300 -1.30282300 -1.87379500  
C 5.17164300 -1.83459200 1.36327500  
H 4.83277500 -1.57282200 2.36009500  
C -0.03739100 3.93621700 -0.79424200  
C -2.18531100 3.45145800 -1.88435400  
H -2.31858100 2.99285100 -2.86554900  
H -2.13488600 4.53471200 -1.96445400  
H -3.01872300 3.15764700 -1.24052700

C 4.69388300 -1.98925500 -0.99137100  
C 4.27245900 -1.64772200 0.29843300  
C 1.40265900 2.08344500 0.02670000  
C 5.96882400 -2.50207000 -1.24443300  
H 6.24886700 -2.75463000 -2.26178100  
H 0.15743100 -0.65865300 -1.56457800  
C 6.83931800 -2.67023100 -0.17603200  
C 6.44275900 -2.33595100 1.13043000  
H 7.83525100 -3.06470100 -0.35600200  
H 7.13387400 -2.47342300 1.95658100  
H 2.10734100 -1.21637300 -2.81594300  
C -0.33474300 0.84571600 2.27757100  
C -0.37306700 -1.40655100 0.65987000  
H 0.47679400 -1.26546700 1.32128200  
N 0.69886700 1.04456300 2.84591900  
H 1.55321900 1.35981800 2.32762500  
C -1.57430600 -0.75979700 0.94869900  
C -1.52201900 0.47362000 1.71561700  
H -0.42419400 -2.37731700 0.17618300  
C -2.87021700 -1.27560300 0.47392800  
C -4.02015600 -1.19662000 1.27439700  
C -2.98176500 -1.92800300 -0.77219900  
C -5.23524600 -1.74443700 0.86562300  
H -3.97028900 -0.72424000 2.24983400  
C -4.18356500 -2.46667800 -1.19404600  
H -2.12338800 -1.96655900 -1.43336100  
C -5.32443700 -2.38196500 -0.37714600  
H -6.09507900 -1.66954200 1.52077800  
H -4.27494800 -2.94794500 -2.16251200  
C -7.64994800 -2.86331700 -0.11781000  
H -8.41855900 -3.35745200 -0.71429700  
H -7.54786600 -3.38153300 0.84440600  
H -7.94137800 -1.82057300 0.06086800  
O -6.45447500 -2.94463600 -0.88192900

C -2.57912100 1.43514800 1.75857100  
N -3.41874600 2.24128900 1.80076700

TS<sub>2</sub> annulation

Charge=0 multiplicity=1

Imaginary Freq = -207.30

O 2.19976400 -1.41415800 1.75162600  
C 1.87876700 -1.00146800 -0.58576700  
O 2.54076300 1.51014000 0.77400900  
C 2.63381300 -1.44850700 0.59711600  
O -1.59555300 1.14627300 -1.45264200  
O 0.53708400 5.17612400 -1.07417900  
O 3.65073800 -1.69617900 -2.07151400  
N -0.58329500 3.17287200 -1.20989100  
C -0.61805000 1.78612000 -1.04300500  
N 1.56174500 3.31966400 -0.23255800  
C 0.49917400 -0.35853400 -0.53149100  
C 0.49302500 1.15323100 -0.35696600  
C 2.67301600 4.17864300 0.19109600  
H 3.05116400 4.73621500 -0.66795200  
H 3.44537300 3.53615300 0.60677700  
H 2.33196400 4.89618300 0.94266400  
C 2.43225900 -1.17524900 -1.80905900  
C 4.82705600 -2.42359500 1.33462500  
H 4.46115800 -2.34008400 2.35267700  
C 0.50419700 3.97262700 -0.86286000  
C -1.74511200 3.80526800 -1.84175100  
H -1.89594400 3.39231100 -2.84235600  
H -1.55089000 4.87399500 -1.89517400  
H -2.63895500 3.60523700 -1.24622000  
C 4.43449500 -2.09296400 -1.01880100  
C 3.97776500 -1.99192100 0.30050900

C 1.59703900 1.94523500 0.06428800  
C 5.69770600 -2.60672500 -1.32694300  
H 6.00848300 -2.66648800 -2.36483600  
H 0.04792000 -0.50068700 -1.51918700  
C 6.51703700 -3.02381700 -0.28690800  
C 6.08361800 -2.93296900 1.04730900  
H 7.50219700 -3.42317300 -0.51075800  
H 6.73546500 -3.26254200 1.85089900  
H 1.93823700 -0.89140800 -2.73279800  
C -0.21157900 0.98808900 2.00197300  
C -0.46805400 -1.17756100 0.43305300  
H 0.12752200 -1.41608300 1.32146900  
N 0.78056300 1.08412800 2.66320600  
H 1.71683100 1.28467200 2.18679200  
C -1.72011700 -0.48719700 0.88432200  
C -1.54353000 0.63890000 1.68511300  
H -0.70991400 -2.12422200 -0.05400400  
C -3.03497100 -1.02788700 0.55189100  
C -4.12205600 -0.96233400 1.45241400  
C -3.24908800 -1.65708400 -0.68867900  
C -5.35518500 -1.49686500 1.12527700  
H -3.98937900 -0.51646200 2.43176600  
C -4.48962000 -2.17736100 -1.03732500  
H -2.44614600 -1.68933900 -1.41670500  
C -5.55450800 -2.10411300 -0.12600300  
H -6.18484000 -1.46209000 1.82357200  
H -4.62027800 -2.62826000 -2.01392300  
C -2.55768500 1.57182500 2.06217700  
N -3.35019000 2.36173900 2.38387800  
O -6.79909600 -2.59029500 -0.35299200  
C -7.07365500 -3.21126300 -1.60332700  
H -6.44415600 -4.09667200 -1.75712800  
H -8.12068700 -3.51428200 -1.55949100  
H -6.93103100 -2.51218200 -2.43665600

**Table 16:** Thermodynamic parameters for Products ( $P_{a-e}$  and  $P_{a'-e'}$ ) at M062x-def2tzvp//b3lyp/6-31g (d) level of theory

| Product   | G            | H            | S       | E            |
|-----------|--------------|--------------|---------|--------------|
| $P_{3a}$  | -1635.707272 | -1635.609097 | 206.627 | -1636.077900 |
| $P_{3a'}$ | -1635.701824 | -1635.602329 | 209.406 | -1636.069952 |
| $P_{3b}$  | -1750.201217 | -1750.097093 | 219.147 | -1750.606164 |
| $P_{3b'}$ | -1750.196799 | -1750.090997 | 222.678 | -1750.598729 |
| $P_{3c}$  | -1864.685816 | -1864.574187 | 234.942 | -1865.123491 |
| $P_{3c'}$ | -1864.679438 | -1864.567173 | 236.282 | -1865.118589 |
| $P_{3d}$  | -2095.312650 | -2095.211014 | 213.911 | -2095.679336 |
| $P_{3d'}$ | -2095.307128 | -2095.204174 | 216.684 | -2095.671310 |
| $P_{3e}$  | -2554.918498 | -2554.813652 | 220.666 | -2555.282148 |
| $P_{3e'}$ | -2554.911549 | -2554.805399 | 223.411 | -2555.272778 |

$P_{3a}$

Charge= 0 multiplicity= 1

O 5.92802500 1.06333400 1.15774500  
O 3.71972800 -1.52938100 -1.12535800  
O -5.12388500 0.70963900 -1.87574500  
O -2.22113000 -1.31909900 1.28865100  
O -6.72827600 -2.00053400 1.42046700  
N -5.91585800 -0.64157500 -0.24197400  
N -2.54688400 0.97212600 -2.19976100  
N -4.47320500 -1.69612600 1.31820100  
N -0.53326400 -2.75614900 -1.53646600  
C 0.00380000 0.57322500 -0.50465000  
C -0.99082000 -0.28380000 -0.90010200  
C -2.40706500 0.14230100 -1.16300500  
C -0.34828500 1.95169100 -0.05306400  
C -3.51479400 -0.34694400 -0.45703800



C 3.78637500 0.44371600 0.22851600  
C 4.36610800 -0.74972700 -0.42926600  
C 5.81490500 -0.93977400 -0.18867900  
C -0.72370000 -1.65016700 -1.22527400  
C 1.38948400 0.12598200 -0.46530200  
H 1.62303600 -0.82666200 -0.92733500  
C 2.38334800 0.82149100 0.13929700  
H 2.13415200 1.75961900 0.63256100  
C -4.85926900 -0.03848100 -0.92012600  
C -1.03433600 4.52896500 0.82128800  
C 6.53885300 -0.03128700 0.59240400  
C -3.31321200 -1.13738900 0.75307400  
C -1.21850600 2.12484000 1.03467800  
H -1.60904800 1.24682100 1.54091800  
C -0.16361500 4.36501800 -0.25870300  
H 0.24471500 5.23433100 -0.76719900  
C 0.18504400 3.08489300 -0.68825900  
H 0.86630700 2.95877200 -1.52571300  
C -1.55509200 3.40736100 1.46893300  
H -2.22505100 3.52934100 2.31570000  
C 4.61228600 1.24819500 0.95798900  
H 4.26948900 2.14394200 1.46599600  
C 6.49963000 -2.03754700 -0.73863000  
H 5.92790900 -2.73558600 -1.34144400  
C -5.77117000 -1.48536100 0.86455700  
C 7.85612000 -2.20791700 -0.50805700  
H 8.37865400 -3.05865700 -0.93496100  
C 7.90575700 -0.18631500 0.83506700  
H 8.42424100 0.54409500 1.44739100  
C 8.55788600 -1.27970100 0.28006800  
H 9.62050000 -1.41498400 0.46007400  
C -7.27141300 -0.36192100 -0.72777000  
H -7.47205400 0.71061900 -0.67054100  
H -7.96584600 -0.91533000 -0.10037900  
H -7.36235100 -0.67476800 -1.77048500

|   |             |             |             |
|---|-------------|-------------|-------------|
| C | -4.34322600 | -2.54701900 | 2.50674200  |
| H | -3.28105700 | -2.65233500 | 2.71446500  |
| H | -4.79821800 | -3.52031600 | 2.31276800  |
| H | -4.85493100 | -2.08791600 | 3.35657100  |
| H | -3.49978600 | 1.24149600  | -2.45987200 |
| H | -1.73995800 | 1.24513100  | -2.74035800 |
| H | -1.30246800 | 5.52681900  | 1.15765100  |

P<sub>3a'</sub>

Charge= 0 multiplicity= 1

|   |             |             |             |
|---|-------------|-------------|-------------|
| O | 2.07458100  | -2.06488900 | 1.25063600  |
| C | 2.00605400  | -0.87315200 | -0.82565300 |
| O | -2.52295700 | 0.85493100  | 1.41125200  |
| C | 2.67273300  | -1.48420400 | 0.34621000  |
| O | -0.60266900 | 3.39567400  | -2.13263000 |
| O | -0.22809200 | 4.71048200  | 2.20869100  |
| O | 4.11865100  | -0.14831400 | -1.74347400 |
| N | -0.42961200 | 4.04072900  | 0.04292700  |
| C | -0.84054000 | 3.13908800  | -0.93987800 |
| N | -1.34581300 | 2.74558300  | 1.80293100  |
| C | 0.56390900  | -0.87931100 | -1.04024600 |
| C | -1.51764400 | 1.93088700  | -0.48448700 |
| C | -1.64295700 | 2.57264300  | 3.22957500  |
| H | -1.15663400 | 3.38112000  | 3.76987400  |
| H | -1.26973400 | 1.60299800  | 3.56551300  |
| H | -2.72355600 | 2.59977800  | 3.39010700  |
| C | 2.78052700  | -0.26148500 | -1.76752800 |
| C | 4.91571800  | -1.87590800 | 1.40542400  |
| H | 4.38945300  | -2.38476200 | 2.20636500  |
| C | -0.64033100 | 3.87956500  | 1.41457800  |
| C | 0.27685600  | 5.26534200  | -0.35076800 |
| H | 1.27129100  | 5.28200800  | 0.10127000  |
| H | -0.27566400 | 6.14003900  | -0.00076300 |
| H | 0.34937100  | 5.26732700  | -1.43539700 |

C 4.81247800 -0.68740300 -0.68622900  
C 4.14682900 -1.34748400 0.35353000  
C -1.84855400 1.76161000 0.93472800  
C 6.20184300 -0.54320100 -0.70421900  
H 6.67255800 -0.02274000 -1.53171100  
H 0.24912200 -0.41454400 -1.97277500  
C 6.93717300 -1.07468900 0.34706000  
C 6.29554800 -1.74238400 1.40444400  
H 8.01833500 -0.97050900 0.34827800  
H 6.88325400 -2.15248200 2.22018800  
H 2.37156100 0.21382600 -2.65336700  
C -1.88659500 0.95849600 -1.42322200  
C -0.37526400 -1.40739500 -0.22238200  
H -0.04909500 -1.93010100 0.66968500  
N -1.74143400 1.14962600 -2.74160300  
H -2.07392100 0.45112700 -3.39089500  
C -1.81966900 -1.40570100 -0.47524200  
C -2.49434400 -0.36626400 -1.05763600  
C -2.54737000 -2.60992900 0.00356000  
C -3.71319400 -2.48430900 0.77695200  
C -2.04080200 -3.89260100 -0.26494400  
C -4.36864000 -3.62073600 1.24775700  
H -4.07672800 -1.49510700 1.03385900  
C -2.70605200 -5.02597200 0.19684100  
H -1.13020000 -3.99648000 -0.84859500  
C -3.87281600 -4.89209000 0.95329600  
H -5.26487400 -3.51105200 1.85189200  
H -2.31224300 -6.01296300 -0.02984400  
C -3.86784100 -0.46198800 -1.44282000  
N -4.96695100 -0.46978300 -1.83169300  
H -1.37593600 2.05386700 -3.04904100  
H -4.38813200 -5.77604400 1.31941400

P<sub>3b</sub>

Charge= 0 multiplicity= 1

O 5.97120000 0.88202700 1.11608900  
O 3.85784800 -1.85700600 -1.08475000  
O -5.04179400 -0.00285000 -1.98921100  
O -2.13562200 -1.63570900 1.39269700  
O -6.61580500 -2.48003400 1.49941900  
N -5.81813800 -1.23815900 -0.25908000  
N -2.46917300 0.32241600 -2.29191100  
N -4.37184800 -2.09832700 1.41252600  
N -0.36396600 -3.27722900 -1.26046300  
C 0.07271600 0.15036300 -0.55488400  
C -0.89628900 -0.76900700 -0.87078700  
C -2.32022700 -0.41077700 -1.18578400  
C -0.31683700 1.54853300 -0.22215800  
C -3.42512700 -0.87496700 -0.45780500  
C 3.85522800 0.16516400 0.19678500  
C 4.47500400 -1.03387000 -0.41262700  
C 5.92681300 -1.17224200 -0.15484500  
C -0.58885700 -2.15213800 -1.05976000  
C 1.47145700 -0.25522200 -0.48798500  
H 1.73412800 -1.22371600 -0.89849000  
C 2.44213000 0.49770100 0.08391900  
H 2.16238800 1.45028500 0.53098600  
C -4.76973800 -0.65642900 -0.96836400  
C -1.08789900 4.18105200 0.42258100  
C 6.61780600 -0.21458300 0.59679500  
C -3.22115900 -1.54620100 0.82170800  
C -1.24212500 1.79632500 0.80994100  
H -1.64193100 0.95688500 1.37114100  
C -0.16093400 3.95274900 -0.60313200  
H 0.26455000 4.77568500 -1.16589600  
C 0.22171500 2.64523000 -0.90763600  
H 0.94322000 2.47833800 -1.70310200  
C -1.61903000 3.09210300 1.13138500  
H -2.32428800 3.29015300 1.93239200  
C 4.65175400 1.02019900 0.90066200

H 4.27896400 1.92352500 1.37281400  
C 6.64740000 -2.26931000 -0.65843800  
H 6.10082800 -3.00568800 -1.23854200  
C -5.66639700 -1.97795400 0.91859200  
C 8.00629500 -2.39151100 -0.41210300  
H 8.55655200 -3.24207200 -0.80303900  
C 7.98665800 -0.32078700 0.85475000  
H 8.47883900 0.44658200 1.44313200  
C 8.67455200 -1.41460000 0.34573800  
H 9.73909500 -1.51219400 0.53836300  
C -7.17241400 -1.05149700 -0.79049900  
H -7.41141800 0.01393000 -0.83086100  
H -7.85960300 -1.57328400 -0.12893800  
H -7.23157100 -1.45691800 -1.80322900  
C -4.23630500 -2.83544700 2.67407100  
H -3.17586200 -2.87864500 2.91085000  
H -4.64851600 -3.83981100 2.55849500  
H -4.78479000 -2.32465100 3.46974700  
H -3.42543900 0.53719400 -2.58759000  
H -1.66145600 0.57542200 -2.84092700  
O -1.52844300 5.40984000 0.80933000  
C -1.03288700 6.55254800 0.12748600  
H -1.28794900 6.52676800 -0.93993900  
H -1.51817700 7.41157600 0.59364700  
H 0.05541700 6.64705700 0.23726300

P<sub>3b'</sub>

Charge= 0 multiplicity= 1

O 0.97359900 -2.65039500 1.11131200  
C 1.62997200 -1.56560400 -0.92045800  
O -1.19063600 2.10188500 1.41684100  
C 1.81900700 -2.46937200 0.23630700  
O 1.91990800 3.49118800 -1.91897200  
O 2.84558800 3.90639100 2.51627200

O 3.81878000 -2.09845700 -1.78992000  
N 2.36252400 3.69240500 0.30253000  
C 1.54240200 3.28530000 -0.75209000  
N 0.82915500 2.96273900 1.95118700  
C 0.42702300 -0.77419400 -1.14949000  
C 0.29120900 2.62522500 -0.40064300  
C 0.44674600 2.83685600 3.36212300  
H 1.28597900 3.17611700 3.96438400  
H 0.20656400 1.79505300 3.58439400  
H -0.43949300 3.44391500 3.56270800  
C 2.63833500 -1.45877400 -1.83291400  
C 3.45251500 -4.04626100 1.30954500  
H 2.71117900 -4.20102800 2.08663500  
C 2.05991500 3.53751200 1.65668900  
C 3.64475100 4.34310800 0.00997300  
H 4.46452900 3.75205500 0.42505000  
H 3.66947600 5.33476900 0.46713000  
H 3.73538300 4.41745700 -1.07068800  
C 4.07492700 -2.95100400 -0.74261000  
C 3.12746600 -3.16138100 0.26636200  
C -0.11466500 2.52255000 1.00553500  
C 5.31729700 -3.58984200 -0.73851300  
H 6.01929800 -3.39414500 -1.54231500  
H 0.43882800 -0.19780500 -2.07321600  
C 5.61263800 -4.45875200 0.30362700  
C 4.68061800 -4.68895500 1.33024500  
H 6.57471400 -4.96259600 0.32184400  
H 4.92549200 -5.37044200 2.13935100  
H 2.58111000 -0.81808100 -2.70701400  
C -0.53627500 2.13909300 -1.42626100  
C -0.66474200 -0.70527000 -0.35461800  
H -0.70625300 -1.32919300 0.53072800  
N -0.26551000 2.36760200 -2.71889000  
H -0.91485800 2.06225400 -3.42975900  
C -1.85620500 0.10084800 -0.64285200

C -1.79567500 1.35635400 -1.19563100  
C -3.14700500 -0.51113500 -0.26309000  
C -4.15082700 0.23459400 0.38829600  
C -3.38100700 -1.87537200 -0.49231100  
C -5.34374200 -0.35807300 0.76705900  
H -3.96797800 1.27522100 0.63200400  
C -4.58251100 -2.47997700 -0.12923200  
H -2.61595400 -2.47385200 -0.97902200  
C -5.57459200 -1.71794600 0.50329400  
H -6.11328300 0.20822000 1.28158700  
H -4.73273400 -3.53291000 -0.33724400  
C -2.95719200 2.02886500 -1.68647600  
N -3.84435400 2.62134800 -2.15815100  
H 0.55447100 2.93916700 -2.93494100  
O -6.77895500 -2.20150300 0.90942900  
C -7.07020600 -3.57331000 0.68415500  
H -8.07267500 -3.73428800 1.08413900  
H -7.06327100 -3.81539500 -0.38647600  
H -6.36056600 -4.22651500 1.20818000

P<sub>3c</sub>

Charge= 0 multiplicity= 1

O 5.92302100 0.53157900 1.23507300  
O 3.71217300 -2.06295400 -1.04412900  
O -5.10924000 0.45442100 -1.65936700  
O -2.21319700 -2.14644500 1.07042500  
O -6.74420500 -2.60856900 1.29422900  
N -5.91603200 -1.07191400 -0.19661100  
N -2.53246700 0.67613600 -2.01366600  
N -4.48083000 -2.39967400 1.14606500  
N -0.52813300 -3.07773900 -1.98625000  
C -0.00987600 0.02113100 -0.36884300  
C -0.98968900 -0.76101800 -0.91602900  
C -2.40308300 -0.29073900 -1.10104800  
C -0.39490600 1.28510400 0.33707700

C -3.51017100 -0.84688700 -0.44775200  
C 3.77304900 -0.10553500 0.33363000  
C 4.35882600 -1.27980900 -0.35238100  
C 5.81578600 -1.44855200 -0.14435100  
C -0.71763700 -2.04544800 -1.48156800  
C 1.37601200 -0.41956200 -0.36154100  
H 1.61534800 -1.33551700 -0.88989500  
C 2.36363700 0.25255700 0.27588100  
H 2.10469800 1.16268800 0.81469200  
C -4.85200300 -0.42661100 -0.82197300  
C -1.05620800 3.59936400 1.76267800  
C 6.54019000 -0.54136200 0.63774100  
C -3.30983700 -1.82295900 0.61953700  
C -1.04021300 1.18940100 1.57976700  
H -1.27520500 0.20466600 1.97140300  
C -0.40095300 3.71128700 0.53292800  
C -0.09082400 2.54404700 -0.20309600  
C -1.37651600 2.34229800 2.27966600  
H -1.88331200 2.27154800 3.23756800  
C 4.59980300 0.69821100 1.06247600  
H 4.25270600 1.58016100 1.59099200  
C 6.50753200 -2.52449100 -0.72763500  
H 5.93495500 -3.22125300 -1.33116300  
C -5.77948500 -2.06611300 0.77831400  
C 7.87120900 -2.67564800 -0.52822500  
C 7.91452200 -0.67739900 0.84934600  
H 8.43322000 0.05120800 1.46370200  
C 8.57348100 -1.74935200 0.26177600  
H 9.64184200 -1.86923100 0.41734600  
C -7.27010000 -0.67069300 -0.59220100  
H -7.41933400 0.39098700 -0.38107600  
H -7.97139700 -1.27615600 -0.02321000  
H -7.40501700 -0.83136300 -1.66431300  
C -4.35750600 -3.42158200 2.19184600  
H -3.29601700 -3.60303700 2.34265500



H -4.86491800 -4.33507300 1.87521300  
H -4.82093000 -3.07057200 3.11747900  
H -3.48006600 0.99909900 -2.22631300  
H -1.71691100 0.99860900 -2.51354500  
H -1.30861800 4.48965300 2.32700100  
H 8.39903900 -3.50954600 -0.98116700  
O 0.55205800 2.56263500 -1.41456300  
O -0.00999300 4.89948700 -0.02246400  
C 0.11287400 3.47071500 -2.43010600  
H -0.98261700 3.53098800 -2.46132800  
H 0.51888900 4.47252500 -2.27947600  
H 0.48394000 3.05727700 -3.37162900  
C -0.32416600 6.10026400 0.66683000  
H 0.15597400 6.13502400 1.65327900  
H 0.06659600 6.90949400 0.04744900  
H -1.40805100 6.22522000 0.78749000

P<sub>3c'</sub>

Charge= 0 multiplicity= 1

O 0.66038400 -2.70689600 1.39718100  
C 1.44670600 -1.80019700 -0.67673300  
O -0.43878900 2.70160300 1.48366700  
C 1.48545700 -2.71683800 0.48544300  
O 2.45538500 3.03680100 -2.28620900  
O 3.92749300 3.92882800 1.92759100  
O 3.45484400 -2.77397300 -1.60374100  
N 3.17304000 3.48537300 -0.17333700  
C 2.18724500 3.07794500 -1.07316200  
N 1.73878800 3.27095100 1.70091300  
C 0.42610700 -0.77941400 -0.88065700  
C 0.89441200 2.70703000 -0.51098800  
C 1.50419700 3.41281400 3.14254000  
H 2.44815000 3.68813500 3.60644700  
H 1.13515900 2.46820600 3.54752700

H 0.74967300 4.18264600 3.32189300  
C 2.43031100 -1.90354600 -1.61622700  
C 2.78041700 -4.60746000 1.51274200  
H 2.04742200 -4.60296900 2.31281500  
C 3.00309200 3.58010300 1.21015300  
C 4.50197000 3.85299000 -0.67590100  
H 5.25806800 3.19329000 -0.24386800  
H 4.73522500 4.88027600 -0.38762100  
H 4.48162100 3.75428800 -1.75828000  
C 3.55623600 -3.66449800 -0.56240800  
C 2.61782200 -3.67142700 0.47630500  
C 0.63897000 2.87147300 0.92348300  
C 4.63453000 -4.55246300 -0.59372800  
H 5.33658000 -4.50823900 -1.41983000  
H 0.55558300 -0.19778000 -1.79082700  
C 4.77116000 -5.46695500 0.44220500  
C 3.84394300 -5.49653400 1.49814900  
H 5.60429800 -6.16385300 0.43247200  
H 2.48183800 -1.26506100 -2.49229700  
C -0.10836900 2.22346200 -1.36091900  
C -0.63798600 -0.53143700 -0.08344600  
H -0.79632000 -1.17349900 0.77522000  
N 0.03830500 2.19368600 -2.69186800  
H -0.72007000 1.86947700 -3.27441200  
C -1.65576300 0.49807600 -0.29704100  
C -1.43822400 1.71564300 -0.87891800  
C -2.99677900 0.21080700 0.29544900  
C -3.46719400 1.00780200 1.35350500  
C -3.75099200 -0.88395500 -0.14563400  
C -4.68421000 0.70892800 1.95262900  
H -2.85888600 1.83756800 1.69695700  
C -4.98572200 -1.18267000 0.47097200  
C -5.44627700 -0.37910500 1.51715900  
H -5.05021500 1.32126500 2.77157000  
C -2.50866600 2.62703000 -1.14026900

N -3.33092800 3.40080400 -1.43011000  
H 0.91140600 2.55921600 -3.07916700  
H -6.39269600 -0.59638800 1.99910200  
H 3.96324600 -6.21685700 2.30190600  
O -3.25339000 -1.67927300 -1.14929900  
O -5.64567200 -2.27303800 -0.02145000  
C -3.94185000 -1.59999700 -2.40048000  
H -4.96932200 -1.96530200 -2.31352500  
H -3.94975400 -0.56855500 -2.77755300  
H -3.38388200 -2.23643400 -3.09147800  
C -6.87206900 -2.64352600 0.58910000  
H -7.20921800 -3.53732400 0.06113500  
H -6.73586100 -2.87991300 1.65234200  
H -7.62936300 -1.85479000 0.48843100

P<sub>3a</sub>

Charge= 0 multiplicity= 1

O 5.23113700 1.84225100 1.25230500  
O 3.32836800 -1.09320600 -0.88641800  
O -5.65768300 0.27147300 -1.98375300  
O -2.66586100 -1.24050200 1.38022200  
O -7.09887000 -2.30510500 1.49042200  
N -6.36860700 -1.01325000 -0.26120300  
N -3.10608700 0.73750900 -2.28159400  
N -4.87713300 -1.81071100 1.40291600  
N -0.78292500 -2.72583100 -1.29398400  
C -0.57767100 0.70465800 -0.50483400  
C -1.47962400 -0.26632900 -0.85492800  
C -2.92098700 0.00766100 -1.17884300  
C -1.06254400 2.07547200 -0.16791200  
C -3.99822600 -0.52303700 -0.45671100  
C 3.17911300 0.96962300 0.32131100  
C 3.87903700 -0.20965000 -0.23526900  
C 5.33365400 -0.24916300 0.05064300  
C -1.08166500 -1.62258500 -1.07090800

C 0.84090800 0.38806100 -0.40082500  
H 1.16983600 -0.57105700 -0.78474800  
C 1.75106800 1.21250000 0.17183500  
H 1.40617100 2.15795400 0.58705500  
C -5.35285900 -0.37309800 -0.96679100  
C -1.99755700 4.63843500 0.49061000  
C 5.95009200 0.77285300 0.78032700  
C -3.75737900 -1.19753500 0.81483300  
C -1.97413500 2.25033500 0.88514900  
H -2.29915800 1.38112300 1.44951800  
C -1.08639300 4.47332400 -0.55528300  
H -0.74287600 5.33532500 -1.12089300  
C -0.61420100 3.20130300 -0.87753700  
H 0.09793100 3.07487100 -1.68887100  
C -2.43465900 3.52616400 1.21203000  
H -3.13585500 3.65034000 2.03276000  
C 3.90936000 1.89392600 1.00974800  
H 3.47531100 2.78837600 1.44442300  
C 6.11889400 -1.31897600 -0.40981900  
H 5.63481400 -2.10810000 -0.97406100  
C -6.17747300 -1.75181000 0.91164600  
C 7.47538400 -1.33885100 -0.13376300  
C 7.31902600 0.75466800 1.06033200  
H 7.76007400 1.56580700 1.62990200  
C 8.08394400 -0.30697300 0.60048500  
H 9.14837100 -0.34546800 0.80455300  
C -7.73134600 -0.89459200 -0.79125300  
H -8.02676700 0.15687200 -0.82277300  
H -8.38959400 -1.45759400 -0.13411200  
H -7.76884400 -1.29427000 -1.80722300  
C -4.70224100 -2.55239200 2.65719200  
H -3.64049100 -2.54527400 2.89183200  
H -5.06424200 -3.57481200 2.53250100  
H -5.27387100 -2.07710800 3.45848700  
H -4.07200200 0.89773100 -2.58108700

H -2.31275600 1.04011900 -2.82653800  
H -2.36212300 5.63038000 0.74326100  
Cl 8.46432300 -2.67073500 -0.70517300

P<sub>3d'</sub>

Charge=0 multiplicity=1

O 2.07490800 -1.64695400 0.79156400  
C 1.56545900 -0.38135400 -1.17830800  
O -2.95286700 0.39764700 1.58596700  
C 2.45293100 -0.91967000 -0.12426700  
O -1.89059400 3.37371700 -1.97967200  
O -1.34053200 4.58713000 2.37272500  
O 3.40296500 0.76993000 -2.24330800  
N -1.62640500 3.96588500 0.20203500  
C -1.95990700 3.03782900 -0.78499700  
N -2.11245600 2.46220900 1.96851400  
C 0.13251700 -0.64388500 -1.25068100  
C -2.35695100 1.70950900 -0.33329800  
C -2.23147000 2.18820500 3.40545700  
H -1.85415900 3.05597200 3.94085400  
H -1.65289600 1.29684500 3.65666300  
H -3.27728200 2.00357000 3.66292200  
C 2.11079300 0.41222200 -2.14484000  
C 4.82513100 -0.95158700 0.68147100  
H 4.49521600 -1.59081500 1.49250300  
C -1.66898200 3.72128800 1.57718700  
C -1.19857800 5.31417300 -0.18941000  
H -0.18600300 5.50262700 0.17472500  
H -1.86718300 6.05703400 0.25104100  
H -1.23114700 5.36597200 -1.27474000  
C 4.29063600 0.31291700 -1.30236400  
C 3.87264100 -0.51280000 -0.25326400  
C -2.50820200 1.43186700 1.09945800  
C 5.62359200 0.70895900 -1.44131400

H 5.90810600 1.35084700 -2.26827200  
H -0.35909000 -0.20123400 -2.11473900  
C 6.55453900 0.26911100 -0.51223200  
C 6.14619400 -0.56099200 0.54550600  
H 7.59521000 0.56221700 -0.59704900  
H 1.53022000 0.85034400 -2.95003300  
C -2.63546600 0.71883300 -1.28308200  
C -0.60196700 -1.37352900 -0.38047500  
H -0.09273000 -1.86735500 0.43937900  
N -2.65873500 0.97694500 -2.59803600  
H -2.92776200 0.25241000 -3.24825400  
C -2.04310200 -1.62750200 -0.48513200  
C -2.95314000 -0.70741800 -0.93121900  
C -2.48571100 -2.96294900 -0.00570800  
C -3.55966200 -3.08383500 0.89154300  
C -1.79281200 -4.11925600 -0.40171000  
C -3.94453900 -4.33895600 1.35982900  
H -4.06181900 -2.18907700 1.24361300  
C -2.18881100 -5.37275000 0.05898400  
H -0.95075600 -4.03159400 -1.08286600  
C -3.26707900 -5.48510300 0.94002100  
H -4.77135600 -4.41949100 2.05988700  
H -1.65400400 -6.26099900 -0.26591200  
C -4.32335800 -1.03662500 -1.17276600  
N -5.44111500 -1.22860700 -1.44271300  
H -2.49814500 1.94346300 -2.89096100  
H -3.57172600 -6.46231500 1.30491000  
Cl 7.34229800 -1.10502500 1.70783600

P<sub>3e</sub>

Charge=0 multiplicity=1

O 5.22082400 1.61547200 1.44976300  
O 3.33674400 -1.22211300 -0.83276300  
O -5.67911600 0.42939700 -1.71745700  
O -2.54191500 -1.74275900 1.11560000

O -7.00176700 -2.66023900 1.36300100  
N -6.33239800 -1.10933600 -0.19143800  
N -3.13321400 0.89126200 -2.08793900  
N -4.77132900 -2.22705600 1.20313500  
N -0.75409600 -2.63085900 -1.91348200  
C -0.57420900 0.53618400 -0.36877800  
C -1.46332100 -0.34321200 -0.91900300  
C -2.91434800 -0.01800300 -1.13599400  
C -1.09309700 1.78573700 0.27261000  
C -3.96127100 -0.65340000 -0.45649100  
C 3.17237500 0.76983100 0.48686500  
C 3.88269100 -0.36588100 -0.14254500  
C 5.34131600 -0.39806800 0.12320400  
C -1.05575300 -1.60924100 -1.44347000  
C 0.84467900 0.22649000 -0.29529800  
H 1.18650300 -0.67587200 -0.78955000  
C 1.74048500 0.99982200 0.36348100  
H 1.38098700 1.89521300 0.86881300  
C -5.33834200 -0.38603600 -0.84536300  
C -2.04619900 4.07908900 1.59903700  
C 5.95075800 0.58873100 0.90529700  
C -3.66600600 -1.55624400 0.65202900  
C -1.69999300 1.68985700 1.53549900  
H -1.79906500 0.70460300 1.98193800  
C -1.45905500 4.19971500 0.33967700  
H -1.37000100 5.16618700 -0.14477700  
C -0.99006000 3.05759500 -0.30783600  
C -2.17059700 2.82381300 2.19559600  
H -2.63622900 2.72526900 3.17173600  
C 3.89606400 1.66145700 1.22357100  
H 3.45393700 2.52242300 1.71408800  
C 6.13744300 -1.42535200 -0.40967700  
H 5.65875000 -2.18715800 -1.01460700  
C -6.09743400 -2.04334500 0.82309700  
C 7.49751500 -1.43908100 -0.15140400

|    |             |             |             |
|----|-------------|-------------|-------------|
| C  | 7.32330000  | 0.57678900  | 1.16729400  |
| H  | 7.75874700  | 1.36005300  | 1.77865700  |
| C  | 8.09903300  | -0.44269200 | 0.63572000  |
| H  | 9.16654800  | -0.47529000 | 0.82408600  |
| C  | -7.71970400 | -0.86465400 | -0.60119400 |
| H  | -7.97628800 | 0.18416800  | -0.43394900 |
| H  | -8.35740600 | -1.51415700 | -0.00657600 |
| H  | -7.83435000 | -1.08262600 | -1.66544500 |
| C  | -4.54796700 | -3.18684800 | 2.29079200  |
| H  | -3.47386000 | -3.25750100 | 2.44465900  |
| H  | -4.96385900 | -4.15780600 | 2.01477700  |
| H  | -5.04330500 | -2.84406800 | 3.20287300  |
| H  | -4.10803300 | 1.11396100  | -2.30690900 |
| H  | -2.35768600 | 1.29649100  | -2.59369500 |
| H  | -2.41213000 | 4.96781100  | 2.10516900  |
| Cl | 8.50003500  | -2.71815000 | -0.81273800 |
| Cl | -0.29673900 | 3.23896500  | -1.92071200 |

P<sub>3e'</sub>

Charge=0 multiplicity=1

|   |             |             |             |
|---|-------------|-------------|-------------|
| O | 2.26398400  | -1.41815700 | 0.92944400  |
| C | 1.71250900  | -0.11933000 | -1.00809400 |
| O | -2.87136000 | 0.73425700  | 1.66353700  |
| C | 2.62098400  | -0.67105300 | 0.02123800  |
| O | -1.99905400 | 3.38857300  | -2.19571300 |
| O | -1.69453400 | 5.12473700  | 2.00183600  |
| O | 3.52156600  | 1.08177100  | -2.06806900 |
| N | -1.85908800 | 4.24473700  | -0.09051400 |
| C | -2.08245300 | 3.18778800  | -0.97247300 |
| N | -2.25707600 | 2.90517100  | 1.82607600  |
| C | 0.28262600  | -0.39727900 | -1.06989100 |
| C | -2.38971100 | 1.89070700  | -0.38082200 |
| C | -2.37765100 | 2.77880900  | 3.28351200  |
| H | -2.11689400 | 3.73877800  | 3.72215800  |



H -1.70485400 1.99609400 3.64054400  
H -3.40087100 2.50106200 3.54725800  
C 2.23492500 0.70697400 -1.96007700  
C 5.00642000 -0.70256400 0.78673500  
H 4.69529400 -1.36558800 1.58599000  
C -1.92049600 4.15051300 1.30248200  
C -1.53444700 5.57368600 -0.62305300  
H -0.54922900 5.88544400 -0.26862600  
H -2.27203600 6.30050000 -0.27628400  
H -1.54617400 5.50377100 -1.70780800  
C 4.42864600 0.60774500 -1.15464100  
C 4.03496200 -0.24845900 -0.12076400  
C -2.53076700 1.75418200 1.07210400  
C 5.75576200 1.01903300 -1.30496700  
H 6.02117600 1.68427600 -2.11973200  
H -0.22793700 0.08267200 -1.90137300  
C 6.70563300 0.56366200 -0.40292500  
C 6.32167300 -0.29684300 0.63950600  
H 7.74232600 0.86775800 -0.49725200  
H 1.63788900 1.15898900 -2.74533900  
C -2.57787700 0.78475600 -1.21618200  
C -0.41790600 -1.19498800 -0.23142900  
H 0.12627300 -1.72319600 0.54345100  
N -2.57348400 0.88197900 -2.55165100  
H -2.75370500 0.06451300 -3.11705200  
C -1.85469100 -1.47125900 -0.28283900  
C -2.82259400 -0.60786000 -0.70541700  
C -2.27622200 -2.76904500 0.33012300  
C -2.95878400 -2.74684600 1.55721900  
C -1.97423400 -4.01645000 -0.23447300  
C -3.31955300 -3.93086900 2.19670400  
H -3.18877400 -1.78209300 1.99899700  
C -2.33822200 -5.20664400 0.39216100  
C -3.00881800 -5.15975100 1.61413600  
H -3.84446100 -3.89161200 3.14647700

|    |             |             |             |
|----|-------------|-------------|-------------|
| H  | -2.10042500 | -6.15448600 | -0.07854300 |
| C  | -4.20239700 | -0.98143100 | -0.74359600 |
| N  | -5.33828100 | -1.22442300 | -0.83469900 |
| H  | -2.45133300 | 1.81338800  | -2.95605500 |
| H  | -3.29015800 | -6.08750100 | 2.10422900  |
| Cl | 7.54135600  | -0.85976400 | 1.76810200  |
| Cl | -1.15602200 | -4.11185800 | -1.792777   |

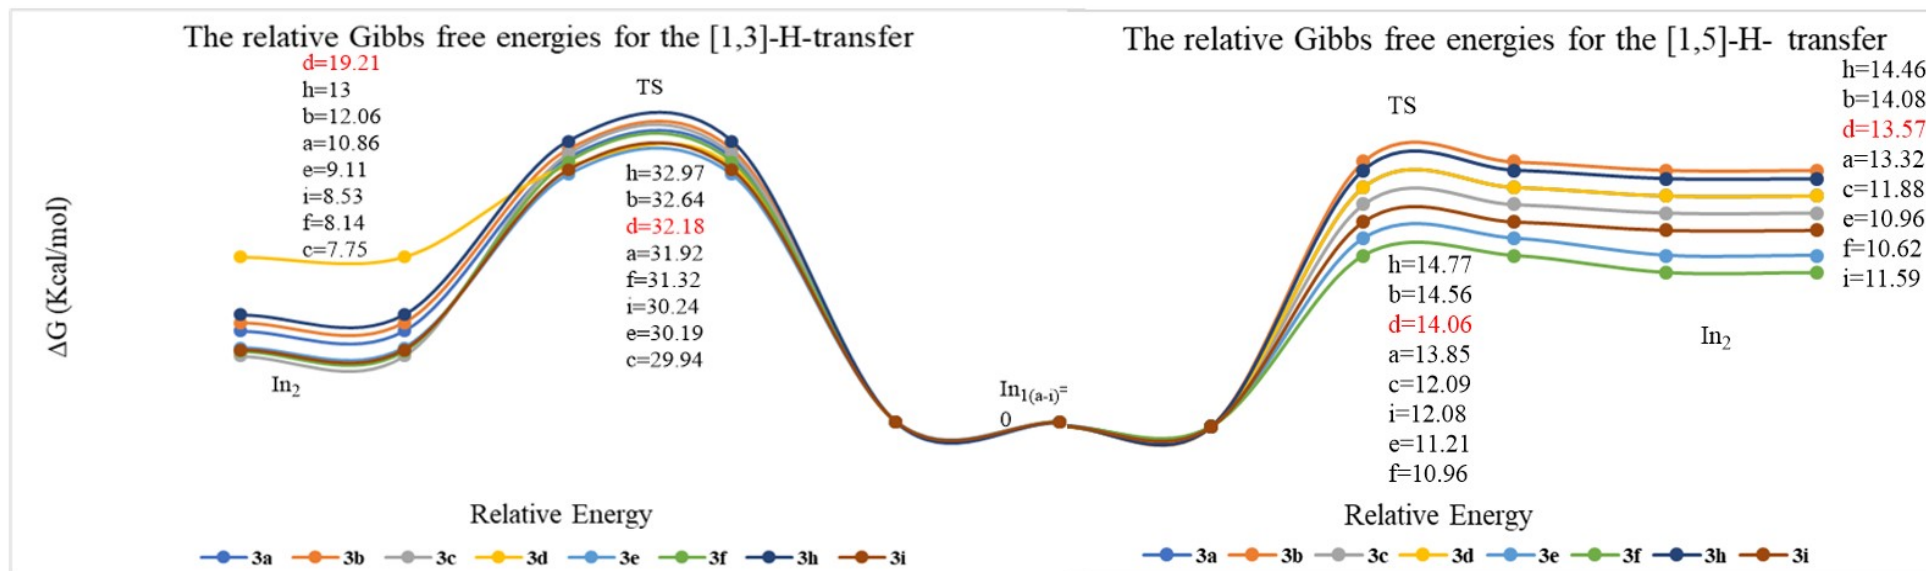

**Fig. 2.** Relative Gibbs free energies for the mechanism of [1,3] and [1,5]-H-transfer (all values in kcal mol<sup>-1</sup>).

**Table 17.** Electron density ( $\rho$  BCP), Laplacian ( $\nabla^2\rho$  BCP), potential energy ( $V$  BCP), kinetic energy ( $G$  BCP), total electron energy densities ( $H_{BCP}= G_{BCP}-V_{BCP}$ ), and interaction energy ( $\Delta E_{HB}= \frac{1}{2} V_{BCP}$ ), calculated at the respective bond critical points, by M06-2X/def2-tzvp in acetonitrile solvent

| Parameter                                         | Distance | $\rho_{BCP}^*$ | $\nabla^2\rho_{BCP}^*$ | $V_{BCP}^*$ | $G_{BCP}^*$ | $H_{BCP}^*$ | $\Delta E_{HB}$ |
|---------------------------------------------------|----------|----------------|------------------------|-------------|-------------|-------------|-----------------|
| BCP (O <sub>3</sub> -C <sub>42</sub> ) <b>3b'</b> | 2.9      | 0.014          | -0.22                  | -0.01       | 0.012       | 0.002       | ----            |
| BCP (O <sub>1</sub> -H <sub>15</sub> ) <b>3b'</b> | 2.6      | 0.007          | -0.11                  | -0.004      | 0.006       | 0.002       | -1.26           |
| BCP (O <sub>1</sub> -H <sub>38</sub> ) <b>3b'</b> | 2.2      | 0.017          | -0.28                  | -0.013      | 0.015       | 0.003       | -3.77           |
| BCP (O <sub>6</sub> -C <sub>26</sub> ) <b>3b'</b> | 3.3      | 0.006          | -0.08                  | -0.003      | 0.004       | 0.001       | ----            |
| BCP (O <sub>7</sub> -H <sub>22</sub> ) <b>3b'</b> | 2.8      | 0.005          | -0.07                  | -0.003      | 0.004       | 0.001       | -0.94           |
| BCP (N <sub>8</sub> -C <sub>17</sub> ) <b>3b'</b> | 3.4      | 0.006          | -0.08                  | -0.003      | 0.004       | 0.001       | -----           |
| BCP (C <sub>2</sub> -N <sub>10</sub> ) <b>3b'</b> | 3.4      | 0.006          | -0.08                  | -0.003      | 0.004       | 0.001       | -----           |
| BCP(C <sub>12</sub> -C <sub>11</sub> ) <b>3b'</b> | 3.0      | 0.014          | -0.18                  | -0.009      | 0.010       | 0.001       | -----           |
| CCP <b>3b'</b>                                    | ----     | 0.003          | -0.05                  | -0.001      | 0.002       | 0.001       | ----            |
| CCP <b>3b'</b>                                    | ----     | 0.005          | -0.07                  | -0.002      | 0.003       | 0.001       | ----            |
| CCP <b>3b'</b>                                    | ----     | 0.01           | -0.19                  | -0.002      | 0.010       | 0.008       | ----            |
| BCP (O <sub>1</sub> -H <sub>24</sub> ) <b>3b</b>  | 1.8      | 0.036          | -0.54                  | -0.035      | 0.034       | -0.001      | -10.98          |
| BCP (O <sub>2</sub> -C <sub>9</sub> ) <b>3b</b>   | 2.7      | 0.018          | -0.28                  | -0.014      | 0.016       | 0.002       | -----           |
| BCP (O <sub>2</sub> -H <sub>32</sub> ) <b>3b</b>  | 2.6      | 0.006          | -0.09                  | -0.004      | 0.005       | 0.001       | -1.26           |
| BCP(O <sub>57</sub> -H <sub>14</sub> ) <b>3b</b>  | 2.2      | 0.017          | -0.28                  | -0.013      | 0.015       | 0.002       | -4.08           |
| CCP <b>3b</b>                                     | ----     | 0.006          | -0.09                  | +0.006      | 0.006       | 0.012       | ----            |

Despite having three cage critical points, the stability of  $P_{3b'}$  originates in numerous intramolecular interactions. Thus, the linear product  $P_{3b}$  could arise from two rotations in the  $\sigma$  bonds of  $P_{3b'}$ , as shown in Scheme 2. The driving force for these rotations could be a reduction in the instability resulting from the repulsion of cage critical points and forming the stronger non-bonding interactions, as in linear product  $P_{3b}$  (Fig 3).

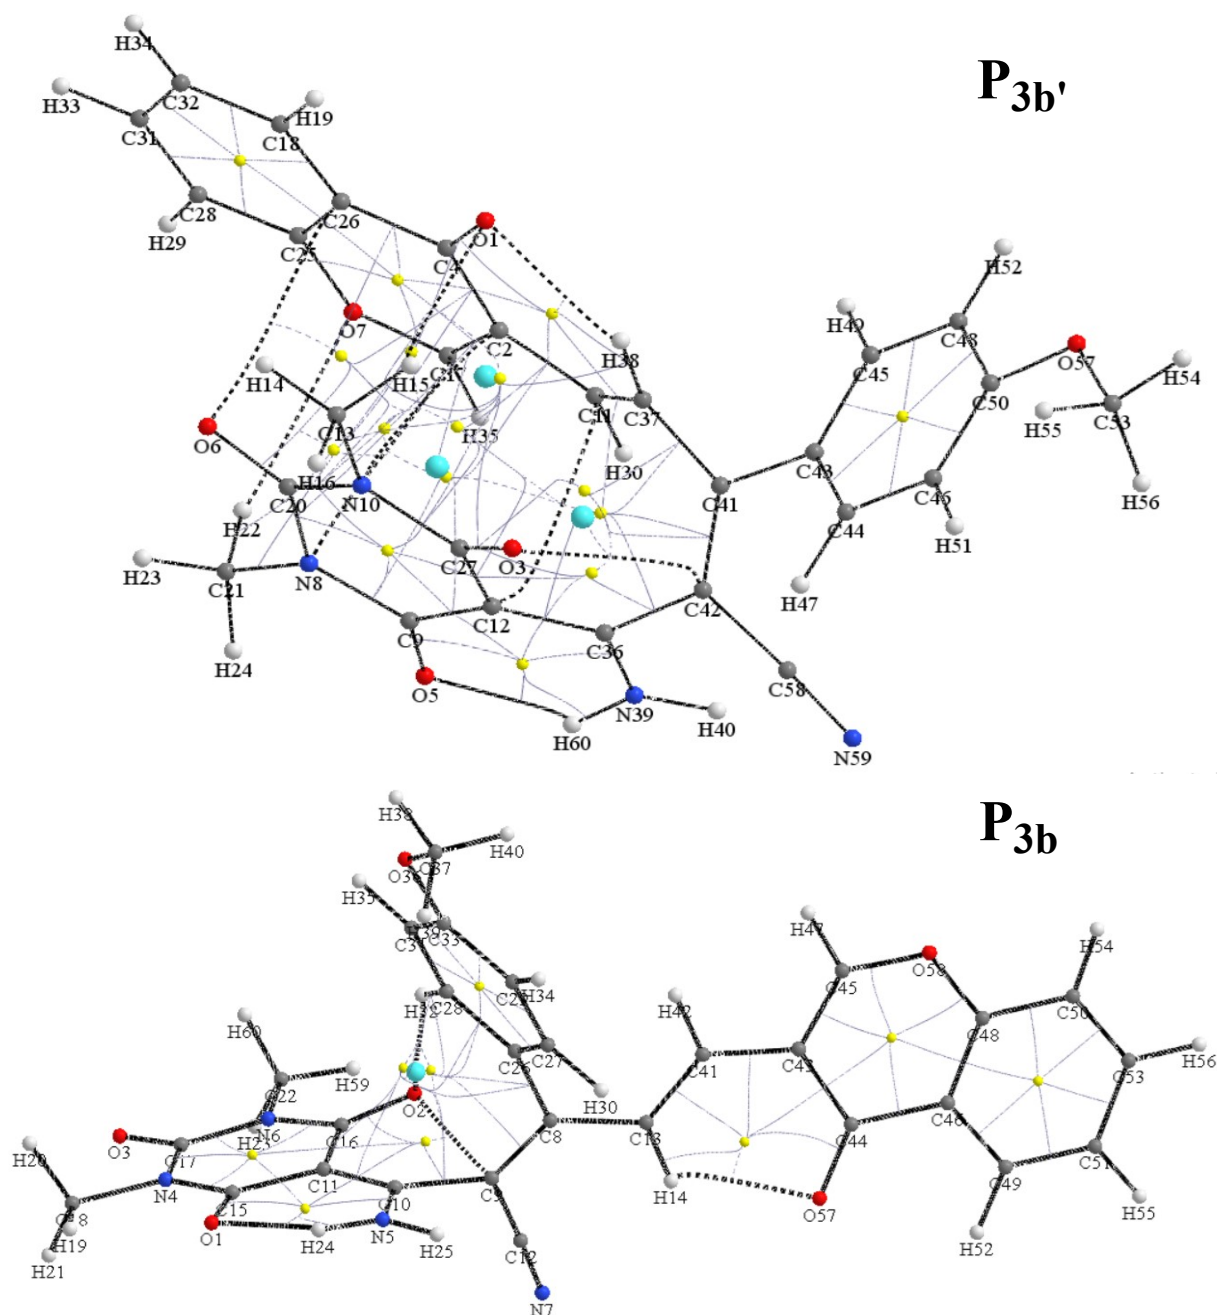

Fig. 3. The molecular graph of stereoisomers  $P_{3b}$ ,  $P_{3b'}$ .

## Reference

- 1 F. Neese, The ORCA program system, *Wiley Interdiscip. Rev. Comput. Mol. Sci.*, 2012, **2**, 73.
- 2 C. Riplinger and F. Neese, *J. Chem. Phys.*, 2013, **138**, 034106.
- 3 C. Riplinger, B. Sandhoefer, A. Hansen and F. Neese, *J. Chem. Phys.*, 2013, **139**, 134101.
- 4 F. Weigend and R. Ahlrichs, *Phys. Chem. Chem. Phys.*, 2005, **7**, 3297.
- 5 (a) Y. Zhao and D. G. Truhlar, *Theor. Chem. Acc.*, 2008, **120**, 215; (b) M. Walker, A. J. Harvey, A. Sen and C. E. Dessent, *J. Phys. Chem. A*, 2013, **117**, 12590.
- 6 (a) S. Grimme, J. Antony, S. Ehrlich and H. Krieg, *J. Chem. Phys.*, 2010, **132**, 154104; (b) S. Ehrlich, J. Moellmann and S. Grimme, *Acc. Chem. Res.*, 2013, **46**, 916; (c) S. Ehrlich, H. F. Bettinger and S. Grimme, *Angew. Chem. Int. Ed.*, 2013, **52**, 10892.
- 7 (a) A. J. Becke, *Chem. Phys*, 1993, **98**, 5648; (b) L. R. Domingo, M. Ríos-Gutiérrez and P. Pérez, *Molecules*, 2016, **21**, 748.
- 8 (a) AIMAll (Version 17.01.25), T. A. Keith, TK Gristmill Software, Overland Park KS; R. W. F. Bader, *Chem. Rev.*, 1991, **91**, 893; (b) R. F. W. Bader, *J. Phys. Chem. A*, 2010, **114**, 7431; (c) R. F. W. Bader, In *Atoms in Molecules: A Quantum Theory*; The International Series of Monographs of Chemistry; J. Halpen, M. L. H. Gren, Eds.; Clarendon Press: Oxford, U.K., 1990.
- 9 (a) B. Mennucci and J. Tomasi, *J. Chem. Phys.*, 1997, **106**, 5151; (b) V. Barone and M. Cossi, *J. Phys. Chem. A*, 1998, **102**, 1995.
- 10 M. J. Frisch, G. W. Trucks, H. B. Schlegel, G. E. Scuseria, M. A. Robb, J. R. Cheeseman, G. Scalmani, V. Barone, G. A. Petersson, H. Nakatsuji, X. Li, M. Caricato, A. V. Marenich, J. Bloino, B. G. Janesko, R. Gomperts, B. Mennucci, H. P. Hratchian, J. V. Ortiz, A. F. Izmaylov, J. L. Sonnenberg, D. Williams-Young, F. Ding, F. Lipparini, F. Egidi, J. Goings, B. Peng, A. Petrone, T. Henderson, D. Ranasinghe, V. G. Zakrzewski,

J. Gao, N. Rega, G. Zheng, W. Liang, M. Hada, M. Ehara, K. Toyota, R. Fukuda, J. Hasegawa, M. Ishida, T. Nakajima, Y. Honda, O. Kitao, H. Nakai, T. Vreven, K. Throssell, J. A. Montgomery, Jr., J. E. Peralta, F. Ogliaro, M. J. Bearpark, J. J. Heyd, E. N. Brothers, K. N. Kudin, V. N. Staroverov, T. A. Keith, R. Kobayashi, J. Normand, K. Raghavachari, A. P. Rendell, J. C. Burant, S. S. Iyengar, J. Tomasi, M. Cossi, J. M. Millam, M. Klene, C. Adamo, R. Cammi, J. W. Ochterski, R. L. Martin, K. Morokuma, O. Farkas, J. B. Foresman, and D. J. Fox, Gaussian Development Version, Revision J.05, Gaussian, Inc., Wallingford, CT, 2019.

- 11 R. Vianello, and Z. B. Maksić, *Tetrahedron*, 2005, **61**, 9381.
- 12 R. Vianello, and Z. B. Maksić, *Tetrahedron lett*, 2005, **46**, 3711.
- 13 Z. B. Maksić, and R. Vianello, *New J. Chem.*, 2004, **28**, 843.
- 14 A. Kütt, T. Rodima, J. Saame, E. Raamat, V. Mäemets, I. Kaljurand, I. A. Koppel, R. Y. Garlyauskayte, Y. L. Yagupolskii, L. M. Yagupolskii and E. Bernhardt, *J. Org. Chem.*, 2011, **76**, 391.
